# Supplementary material for: Improving risk factor management for patients with poorly controlled type 2 diabetes: a systematic review of healthcare interventions in primary care and community settings
Source: PubMed Central journal article supplement — BMJ Open. 2017 Aug 4;7(8):e015135. doi: 10.1136/bmjopen-2016-015135 (PMC5724222; doi:10.1136/bmjopen-2016-015135), 2017-08-04
Supplement: bmjopen-2016-015135.draft_revisions.pdf [file bmjopen-2016-015135.draft_revisions.pdf]

# BMJ Open

## Improving risk factor management for patients with poorly controlled type 2 diabetes: A systematic review of healthcare interventions in primary care and community settings

|                                 |                                                                                                                                                                                                                                                                                                                                                                                                                                                                                                                              |
|---------------------------------|------------------------------------------------------------------------------------------------------------------------------------------------------------------------------------------------------------------------------------------------------------------------------------------------------------------------------------------------------------------------------------------------------------------------------------------------------------------------------------------------------------------------------|
| Journal:                        | <i>BMJ Open</i>                                                                                                                                                                                                                                                                                                                                                                                                                                                                                                              |
| Manuscript ID                   | bmjopen-2016-015135                                                                                                                                                                                                                                                                                                                                                                                                                                                                                                          |
| Article Type:                   | Research                                                                                                                                                                                                                                                                                                                                                                                                                                                                                                                     |
| Date Submitted by the Author:   | 11-Nov-2016                                                                                                                                                                                                                                                                                                                                                                                                                                                                                                                  |
| Complete List of Authors:       | Murphy, Mark; HRB Centre for Primary Care Research, Department of General Practice<br>Byrne, Molly; University of Galway, Ireland, School of Psychology<br>Galvin, Rose; University of Limerick, Department of Clinical Therapies<br>Boland, Fiona; Royal College of Surgeons Ireland, 123 St Stephens Green, HRB Centre For Primary Care Research, Division of Population Health Sciences (PHS)<br>Fahey, Tom; Royal College of Surgeons in Ireland, Department of General Practice<br>Smith, Susan; RCSI, General Practice |
| <b>Primary Subject Heading</b>: | Diabetes and endocrinology                                                                                                                                                                                                                                                                                                                                                                                                                                                                                                   |
| Secondary Subject Heading:      | General practice / Family practice, Epidemiology, Health services research                                                                                                                                                                                                                                                                                                                                                                                                                                                   |
| Keywords:                       | DIABETES & ENDOCRINOLOGY, EPIDEMIOLOGY, GENERAL MEDICINE (see Internal Medicine), HEALTH SERVICES ADMINISTRATION & MANAGEMENT                                                                                                                                                                                                                                                                                                                                                                                                |
|                                 |                                                                                                                                                                                                                                                                                                                                                                                                                                                                                                                              |

SCHOLARONE™  
Manuscripts

**Title**

Improving risk factor management for patients with poorly controlled type 2 diabetes: A systematic review of healthcare interventions in primary care and community settings

**Corresponding author**

Dr. Mark E Murphy, MB BCh BAO BMedSci MRCP MICGP

HRB Centre for Primary Care Research,

Department of General Practice,

Royal College of Surgeons, Ireland,

Dublin 2,

Ireland.

Telephone: 01 4028504

Email: [markmurphy@rcsi.ie](mailto:markmurphy@rcsi.ie)

**Co-authors**

Dr. Molly Byrne, BA MSc PhD <sup>2</sup>

Dr. Rose Galvin, PhD BScPhysio DipStats MISCSP <sup>3</sup>

Dr. Fiona Boland, MSc PhD <sup>1</sup>

Professor Tom Fahey, MSc MD DCH DObs MEd Cert MFPH FRCGP <sup>1</sup>

Professor Susan M Smith, MD MSc MB BCh BAO DCH MRCPI MRCGP <sup>1</sup>

**Co-authors institutions**

1/ HRB Centre for Primary Care Research, Royal College of Surgeons, Ireland

2/ Department of Physiotherapy, University of Limerick, Ireland

3/ Health Behaviour Change Research Group, School of Psychology, National University of Ireland, Galway, Ireland.

**Word Count: 3976**

For peer review only

**Abstract**

Objectives: Poorly-controlled type 2 diabetes mellitus (T2DM) is a major international health problem. Our aim was to assess the effectiveness of healthcare interventions, specifically targeting patients with poorly-controlled T2DM, which seek to improve glycaemic control and cardiovascular risk in primary care settings.

Design: Systematic review.

Setting: Primary care and community settings.

Included studies: Randomised controlled trials (RCTs) targeting patients with poor glycaemic control were identified from Pubmed, Embase, Web of Science, Cochrane Library and SCOPUS. Poor glycaemic control was defined as HbA1c over 68mmol/mol (7.5%).

Interventions: Interventions were classified as organisational, patient-oriented, professional, financial or regulatory.

Outcomes: Primary outcomes were HbA1c, blood pressure and lipids. Two reviewers independently assessed studies for eligibility, extracted data, and assessed study quality. Meta-analyses were undertaken where appropriate using random-effects models. Subgroup analysis explored the effects of intervention type, baseline HbA1c, study quality and study duration. Meta-regression analyses were undertaken to investigate identified heterogeneity.

Results: Thirty-eight RCTs were identified, including 10,407 patients with most undertaken in the USA. In general studies had low risk of bias. The main intervention-types were patient-directed (48%) and organisational (48%). Overall, interventions reduced HbA1c by -0.34% (95% CI; -0.46%, -0.21%) but meta-analyses had high statistical heterogeneity. Subgroup analyses suggested that organisational interventions, interventions on those with baseline HbA1c over 9.5% and studies of longer duration had better improvements in HbA1c. Meta-regression analyses suggested that only interventions on those with population HbA1c over 9.5% were more effective. Interventions did not improve blood pressure or lipids, although

1  
2  
3 baseline levels of control were generally good.  
4

5  
6 Conclusions: This review suggests that interventions for T2DM, in primary care, are  
7  
8 better targeted at individuals with very poor glycaemic control and that  
9  
10 organisational interventions may be more effective.  
11

### 12 13 14 **Article summary:**

#### 15 'Strengths and limitations of the study'

- 16  
17 • This systematic review adds to the evidence regarding the effectiveness of  
18  
19 healthcare interventions, which specifically target patients with poor  
20  
21 glycaemic control of Type 2 Diabetes Mellitus, in community settings.  
22
- 23 • There is no specific definition for 'poor control' diabetes in the literature, but  
24  
25 by including all studies that had patients with a HbA1c > 59 mmol/mol (7.5%),  
26  
27 we captured the full range of poor glycaemic control and also examined  
28  
29 other key risk factors such as blood pressure and lipids.
- 30 • Data were pooled from 38 studies across four continents, enhancing the  
31  
32 generalisability of the findings.
- 33 • We did not account for medication use in the studies, but given that all  
34  
35 included studies were RCTs, which would balance out delivery of  
36  
37 medications, we think that differences relating to underlying medication  
38  
39 usage relate to how different interventions types promote the intensification  
40  
41 of medications.
- 42 • An individual patient data meta-analysis may answer further questions not  
43  
44 possible in this review.  
45

#### 46 47 **Funding statement:**

48  
49 This work was supported by the HRB Centre for Primary Care Research (Research  
50  
51 Grant: HRC-2014-1), a publicly funded body. Four of the six study authors are  
52  
53 employed by this agency.  
54  
55  
56  
57  
58  
59  
60

**Competing interests statement:**

Nil

**Author's contributions:**

All authors contributed to the drafting of the paper. MEM, MB and RG independently assessed studies for eligibility, extracted data, and assessed study quality. Decisions or disagreements were brought to SMS. SMS, TF and FB provided methodological and statistical support to the paper. All authors contributed to the writing of the paper.

## Main text

### Introduction

Worldwide, type 2 diabetes mellitus (T2DM) is rising in prevalence and will exceed 4.4% of the world's population, or 366 million by 2030 (1). Despite a wealth of evidence regarding the importance of risk factor control in T2DM, many patients continue to have poor control of HbA1c, blood pressure and lipids. Up to 60% of patients fail to meet target HbA1c levels (2). Similarly over one third of patients with T2DM have inadequate blood pressure control (3). Poorly-controlled T2DM - and its associated microvascular and macrovascular complications - is associated with higher morbidity, higher mortality, poorer quality of life and substantial economic burden (4).

Several systematic reviews have examined interventions designed to support the delivery of diabetes care in the community to improve glycaemic and cardiovascular risk factor control (5-10). A 2011 review of community-based interventions including all patients with T2DM, comprising sixty-eight studies, showed that only one third had a statistically significant improvement in one of the relevant clinical outcomes for diabetes: HbA1c, blood pressure or lipids (8). The majority of included studies targeted all patients with T2DM without focussing on those with poor control. Although no overall effect was noted, combining organisational with professional (multifaceted) interventions was concluded to be more beneficial than single interventions and the highest quality multifaceted randomised controlled trials (RCTs) tended to include decision support interventions and elements. A 2013 review looked at 48 cluster RCTs, assessing the effectiveness of Quality Improvement (QI) strategies on the management of diabetes (both type 1 and 2) (11). It suggested that QI interventions, which intervened at a system level on diabetes management, were associated with the largest benefits in glycaemic control and that the effectiveness of interventions targeting healthcare practitioners varied with baseline glycaemic control; being more effective with patients with worse control (11). A 2016 review, of type 1 or type 2 diabetes in primary care, looked at the effects of Clinician Education, Clinician Reminders, Team Changes, Case Management,

1  
2  
3 Electronic Patient Registry, Telemedicine and Audit and Feedback (10). Including  
4 thirty studies, it concluded that multifaceted interventions on multidisciplinary  
5 teams were most effective. Interventions targeting family physicians were only  
6 effective if computerised feedback on insulin prescribing was provided.  
7  
8  
9

10  
11  
12 Four large RCTs from North America and the UK have investigated the effects of  
13 intensive management of hyperglycaemic and cardiac risk factors on mortality in  
14 T2DM across all settings (12-17). Uncertainty remains regarding intensive glycaemic  
15 management for all patients with T2DM, with concerns about aggressive reductions  
16 in HbA1c (18). Targeted reductions in cardiovascular and glycaemic risk factors in  
17 certain vulnerable populations (cognitively impaired, disabled and frail) have been  
18 advocated (19). Interventions that specifically target those with very poor control of  
19 risk factors may be more beneficial than those targeting all patients, achieving the  
20 benefits of cardiovascular and glycaemic control, but without the potential risks of  
21 intensively lowering HbA1c in all persons with T2DM. The effect of interventions  
22 specifically targeting patients with poorly controlled T2DM in primary care is  
23 unknown.  
24  
25  
26  
27  
28  
29  
30  
31  
32  
33

34  
35 Our aim was to assess the effectiveness of healthcare interventions delivered in  
36 primary care and community settings, targeting poorly-controlled T2DM, which seek  
37 to improve glycaemic control, blood pressure and lipids.  
38  
39  
40  
41  
42  
43  
44  
45  
46  
47  
48  
49  
50  
51  
52  
53  
54  
55  
56  
57  
58  
59  
60



## Methods

The Preferred Reporting Items for Systematic Reviews and Meta-Analyses (PRISMA) guidelines were used to standardise the conduct and reporting of the research and the protocol was registered on PROSPERO (20).

### *Data Sources and Searches*

We searched articles in all languages from the Cochrane Library, Pubmed, Embase, Web of Science and SCOPUS from 1990 to 31st December 2015. Reference lists of all included papers were searched. Secondary searching of all references from included studies was also conducted. *Appendix 1* outlines the search string.

### *Study Selection*

We considered randomised controlled trials (RCTs), controlled clinical trials (CCTs), controlled before and after studies (CBAs) and interrupted time series analyses (ITS) meeting the Cochrane Effective Practice and Organisation of Care (EPOC) quality criteria (21). Studies published in all languages were eligible.

### Population:

Individuals with 'poorly controlled' T2DM were our population of interest. Though there is a broad consensus about the importance of achieving good glycaemic control for the reasons described, there are no validated cut-offs, which define 'poor-control' of T2DM for targeted interventions. Poorly controlled T2DM has been defined based upon elevated glycated haemoglobin levels in the literature, with different thresholds of HbA1c described, from over 59 mmol/mol (7.5%), over 64 mmol/mol (8.0%) to over 75 mmol/mol (9.0%) (22-24). A recent definition from 2015 of 'persistently poorly controlled diabetes' as a HbA1c over 75 mmol/mol (9.0%) for over one year (25). In this review, we considered participants to have poorly controlled T2DM if their HbA1c was over 59 mmol/mol (7.5%) (or if over 80% of the population in a study had a HbA1c over 59 mmol/mol). Similarly there is no defined cut off as to what defines 'poorly-controlled' blood pressure. We identified studies primarily based on poor glycaemic control but also included participants in these

1  
2  
3 studies who had uncontrolled hypertension or elevated cholesterol/ lipids, if the risk  
4 factor level was above that of an accepted international target, as designated by the  
5 study authors. Where studies included patients with 'poor control' based upon a  
6 range of risk factor profiles, for consistency, we only included a study if 80% of the  
7 population had a HbA1c over 59 mmol/mol (7.5%).  
8  
9

### 10 11 12 Interventions:

13  
14 We included interventions delivered by healthcare professionals (HCPs) specifically  
15 aiming to target patients with poor control of T2DM, based in primary care or  
16 community settings. The primary healthcare setting was defined as providing  
17 "integrated, easy to access, health care services by clinicians who are accountable  
18 for addressing a large majority of personal health care needs, developing a sustained  
19 and continuous relationship with patients, and practicing in the context of family and  
20 community" (26). We excluded drug trials though interventions could have involved  
21 treatment intensification. Interventions were defined as simple if they had one  
22 identifiable component and multifaceted if they had more than one element. We  
23 excluded trials performed within the hospital or the hospital-outpatient setting. The  
24 Cochrane EPOC taxonomy of interventions was utilised and the predominant  
25 intervention type was defined using five categories including organisational, patient-  
26 centred, regulatory, financial and professional (*Appendix 2*) (21):  
27  
28  
29  
30  
31  
32  
33  
34  
35  
36  
37  
38

### 39 Comparison:

40 Comparison groups were included if they received usual care in that setting for  
41 T2DM. Controls were also included if they received minor enhanced elements of  
42 care, such as education leaflets, which the study authors believed did not go beyond  
43 usual care in most settings.  
44  
45  
46  
47  
48

### 49 Outcome measures:

50 Primary outcomes included glycaemic control (HbA1c), blood pressure (systolic or  
51 diastolic) and lipid levels, but if studies did not include HbA1c they were excluded.  
52 Secondary outcomes included patient reported outcome measures (PROMs) (for  
53 example health related quality of life), utilisation of health services, behavioural  
54  
55  
56  
57  
58  
59  
60

1  
2  
3 outcomes such as medication adherence, provider behaviour, acceptability of service  
4 to patients and providers, economic outcomes and adverse events.  
5  
6

#### 7 8 *Data Extraction and Quality Assessment*

9  
10 Two reviewers (MEM and RG) read the titles and/ or abstracts of the identified  
11 references and eliminated irrelevant studies. Studies that were deemed eligible for  
12 inclusion were read in full and their suitability for inclusion in the systematic review  
13 was independently determined by two reviewers. Disagreements were managed by  
14 a third, independent reviewer (SMS). The following information was extracted: a)  
15 Details of intervention, b) Participants, c) Clinical setting, d) Study design, e)  
16 Outcomes, f) Author Information. We contacted authors for missing data.  
17  
18

19  
20 Risk of bias in articles was assessed using the Cochrane Handbook for systematic  
21 reviewing and EPOC criteria (27). Two review authors independently assessed the  
22 risk of bias of each included study against the criteria described in the Cochrane risk  
23 of bias tool. We explicitly judged each of these criteria using: low risk of bias, high  
24 risk of bias or unclear risk of bias (either lack of information or uncertainty over the  
25 potential for bias). We resolved disagreements by consensus and consulted a third  
26 review author to resolve disagreements if necessary. An overall assessment of a  
27 study's risk of bias was determined using EPOC guidance, with judgement and  
28 consensus reached between two reviewers (MEM and SMS) (27).  
29  
30  
31  
32  
33  
34  
35  
36  
37  
38

#### 39 40 *Data Analysis*

41  
42 For continuous data we calculated the treatment effect using mean differences (MD)  
43 and 95% confidence intervals (CI). No binary outcomes were included. Revman  
44 software was used to perform the analysis, determine heterogeneity and produce  
45 forest plots to illustrate pooled estimates (21). Stata version 13 was used to  
46 investigate publication bias by creating funnel plots and using Egger's test to assess  
47 funnel plot asymmetry (28). A random-effects analysis was applied and  
48 heterogeneity across the studies was quantified using the  $I^2$  statistic. If the  $I^2$  statistic  
49 was >50%, it was deemed that there was significant heterogeneity between the  
50 studies.  
51  
52  
53  
54  
55  
56  
57  
58  
59  
60

1  
2  
3 Subgroup analyses were performed for primary outcomes based on a priori  
4 assumptions, as per the PROSPERO protocol (20). For HbA1c we explored the  
5 possible effects of subgroups; a) the type of intervention based upon the EPOC  
6 taxonomy (*Appendix 2*); b) study quality and c) baseline HbA1c in the study  
7 populations (HbA1c 7.5% - 9.4%, or  $\geq 9.5\%$ ). After reviewing the included studies we  
8 also included study duration as a subgroup ( $< 12$  months or  $\geq 12$  months), as a wide  
9 range in study duration was found. Subgroup analyses for systolic blood pressure  
10 (SBP) and diastolic blood pressure (DBP) explored the effects of intervention-type  
11 based upon the EPOC taxonomy.  
12  
13  
14  
15  
16  
17  
18  
19

20 When important heterogeneity was identified, we investigated its causes using  
21 meta-regression. Meta-regression is an extension to subgroup analysis that allows  
22 the effect of continuous, as well as categorical, characteristics to be investigated  
23 (29). Meta-regression was performed to explore the effects of; a) study quality  
24 (using the overall assessment risk of bias); b) study population characteristics (e.g.  
25 gender, age and baseline HbA1c and SBP); c) intervention type (EPOC taxonomy);  
26 and d) study duration on the primary outcomes (29). Random effects meta-  
27 regression was performed using Stata 13 (28).  
28  
29  
30  
31  
32  
33  
34  
35  
36  
37  
38  
39  
40  
41  
42  
43  
44  
45  
46  
47  
48  
49  
50  
51  
52  
53  
54  
55  
56  
57  
58  
59  
60

## Results

Overall 15,130 titles were screened and 38 full text articles met the inclusion criteria (Figure 1: PRISMA Flow diagram). All 38 studies were RCTs, encompassing 45 interventions in total, comprising 10,407 patients (22-25, 30-63). No other eligible study designs were identified.

### *Characteristics of studies*

Twenty-nine of the 38 studies were conducted in the United States, six in Europe, two in Australia and one in Israel. Follow-up of outcomes in the studies varied in length from 3 (53) to 36 months (46). The mean HbA1c across all studies was 9.5% (95% CI; 9.2%, 9.8%). The mean age of patients in the studies varied from 49.6 (47) to 63.2 (64); partly reflecting different inclusion criteria (Table 1). Twenty-six studies explicitly defined their study population as “poorly controlled”, “complicated” or “persistently poorly controlled”, whereas the other twelve had poorly controlled T2DM with HbA1c  $\geq$  59 mmol/mol (7.5%) as per the review inclusion criteria. Twenty-four of the 38 studies reported SBP results (22-25, 30-36, 38, 39, 41, 45, 46, 48-51, 54, 58, 59, 61) and of these, twenty reported DBP (22-25, 31, 32, 34-36, 38, 39, 41, 45, 46, 48, 49, 51, 54, 58, 61). Seventeen of the studies reported a lipid outcome (23, 24, 30-32, 35, 36, 38, 39, 41, 45, 46, 48, 51, 56, 58, 61). All of the 38 studies reported at least one secondary outcome. Two studies were excluded from primary outcome analysis due to lack of appropriate data, despite efforts to contact authors (31, 60).

Interventions were all complex with multiple components. Studies were categorised based on the predominant intervention element using the EPOC taxonomy. The included interventions were categorised as predominantly patient-centred (n=18, 47%); organisational (n=18, 47%), financial (n=1, 3%) or professional (n=1, 3%). One study (Long et al. 2012) comprised two intervention arms with a patient-centred and financial intervention (included as a patient-centred predominant intervention in our analysis). Descriptions of the interventions are outlined in Table 1.

The eighteen patient-centred interventions in our review included four telephone-

(34, 41, 56, 58), four computerised/ mobile phone based- (32, 36, 52, 60), one video-based- (51), four peer-support- (30, 38, 44, 49), three self-monitoring-based (37, 50, 63) and two-culturally-supportive self-management interventions (39, 45). The 18 organisational interventions included five pharmacist interventions performing case management (35, 40, 47, 48, 57), six nurse case management interventions (23, 31, 46, 53, 55, 59), three web-based/ telemedicine/ telephone case management interventions (24, 25, 62), two new-clinic-based interventions (43, 54), one community health-worker intervention (61) and one psychological intervention (22). More detailed descriptions of the interventions are outlined in *Appendix 3*.

### *Risk of bias*

All 38 studies were RCTs, with six being cluster RCTs. Overall, 22 studies were classified as having a predominant low-risk of bias (58%) (22-24, 32-36, 39, 41, 42, 45, 46, 51, 53-55, 58-60, 62, 63), twelve studies had an unclear-risk (32%) (25, 30, 31, 37, 38, 40, 44, 47, 49, 56, 57, 61) and four RCTs were classified as having a high-risk of bias (10%) (43, 48, 50, 52) (*Appendix 4*). Blinding of outcome assessment was classified as low-risk in all studies. Attrition bias was evident in seven studies. *Appendix 5* outlines the summary judgements for both overall risk of bias and predominant intervention type, which were used in the meta-regression analysis.

There was no evidence of publication bias in the studies included in the HbA1c ( $p = 0.41$ ) or DPB analysis ( $p = 0.29$ ). However, there was some evidence of publication bias in the studies included in the SBP analysis ( $p < 0.01$ ). See *Appendix 6*.

### *Primary outcomes*

#### HbA1c

Overall 36 of the 38 studies were included in a meta-analysis, which found a mean difference (MD) in HbA1c of -4 mmol/mol (-0.34%) (95% CI; -0.46%, -0.21%) favouring intervention groups, but with statistical heterogeneity ( $I^2 = 68\%$ ). *Figure 2(a)* outlines the overall effect of interventions on HbA1c, across EPOC categories.

Subgroup analyses were performed based upon the predominant organisational

1  
2  
3 type (*Figure 2(a)*), the baseline HbA1c level (*Figure 2(b)*), study quality (*Figure 2(c)*)  
4 and study duration (*Figure 2(d)*). These analyses suggested that organisational  
5 interventions (MD in HbA1c of -5 mmol/mol (-0.48%) (95% CI; -0.73%, -0.23%);  $I^2 =$   
6 80%) (more than patient-centred interventions), on those with baseline HbA1c over  
7 80mmol/mol (9.5%) (MD in HbA1c of -7 mmol/mol (-0.60%) (95% CI; -0.84%, -  
8 0.36%));  $I^2 = 74%$ ) and studies of longer duration (MD in HbA1c of -4 mmol/mol (-  
9 0.38%) (95% CI; -0.57%, -0.20%);  $I^2 = 74%$ ) had better improvements in HbA1c.  
10 Studies with a low-risk of bias appeared to have a smaller reduction in HbA1c  
11 compared to unclear- and high-risk studies (MD in HbA1c of -3 mmol/mol (-0.28%)  
12 (95% CI; -0.42%, -0.21%);  $I^2 = 57%$ ).

13  
14  
15  
16  
17  
18  
19  
20  
21  
22 As the overall results showed statistical heterogeneity, meta-regression analysis was  
23 also conducted to explore the components of this heterogeneity. As with the meta-  
24 analyses, higher baseline HbA1c was associated with a greater reduction in HbA1c  
25 ( $\beta$ -Coefficient -0.32 (95% CI; -0.47, -0.18),  $p < 0.001$ ). The predominant-intervention  
26 type, risk of bias and study-duration were not associated with improved glycaemic  
27 control.

### 28 29 30 31 32 33 Blood pressure

34  
35  
36 Overall SBP did not improve in the twenty-three interventions included in the meta-  
37 analysis (MD SBP - 0.76 mmHg (95%; CI -2.00, 0.47)) with moderate heterogeneity  
38 ( $I^2 = 40%$ ) (22-25, 30-36, 38, 39, 41, 45, 46, 48-51, 54, 58, 59, 61). DBP improved  
39 modestly in the nineteen studies included in the meta-analysis (MD DBP -  
40 1.21mmHg (95%; CI -2.24, -0.18)) with moderate heterogeneity ( $I^2 = 48%$ ) (*Appendix*  
41 7) (22-25, 31, 32, 34-36, 38, 39, 41, 45, 46, 48, 49, 51, 54, 58, 61).

42  
43  
44  
45  
46  
47  
48 In the subgroup analysis, intervention-type did not appear to differentially affect SBP  
49 (*Appendix 7*). With DBP however, organisational interventions appeared to improve  
50 DBP modestly (MD DBP - 2.66mmHg (95%; CI -4.27, -1.05) ( $I^2 = 36%$ )) compared to  
51 patient-centred interventions (*Appendix 8*). Meta-regression analysis was not  
52 conducted for SBP or DBP as significant heterogeneity was not present.

### 53 54 55 56 57 Lipids

1  
2  
3 Seventeen of the 38 studies reported total cholesterol, LDL-cholesterol, HDL-  
4 cholesterol or triacylglycerides (23, 24, 30-32, 35, 36, 38, 39, 41, 45, 46, 48, 51, 56,  
5 58, 61). Statistically significant improvements in lipids were only demonstrated in  
6 four of these 17 studies (31, 32, 45, 48). Baseline lipid levels were generally not  
7 reported. Eight of the seventeen studies reported data relating to total cholesterol.  
8 Meta-analysis was undertaken on these studies, which indicated no difference in MD  
9 (MD Total Cholesterol – 2.19 mg/dl (95% CI -6.5, 2.11);  $I^2 = 0\%$ ) (*Appendix 9*) (35, 36,  
10 38, 41, 45, 46, 58, 61).

### 11 12 13 14 15 16 17 18 *Secondary outcomes*

19  
20 All but one the 38 included studies reported at least one of the eligible secondary  
21 outcomes (*Appendix 10*). Overall, interventions had very limited effect on secondary  
22 outcomes. Twenty-three studies reported other physical outcomes (e.g. BMI, and  
23 estimated glomerular filtration rate). Of the twelve studies that reported on weight  
24 or BMI, only one showed significant improvement (56). Seven studies reported  
25 mental health outcomes (25, 36, 38, 41, 45, 58, 63) with one showing a significant  
26 improvement in the Change Mental Component Summary Score (63). Twenty-five  
27 studies reported PROMs, ten showing an improvement with the intervention. Nine  
28 studies reported medication adherence outcomes, two showing improvement.  
29 Sixteen studies reported utilisation outcomes with four improving processes of care.  
30  
31  
32  
33  
34  
35  
36  
37  
38  
39  
40  
41  
42  
43  
44  
45  
46  
47  
48  
49  
50  
51  
52  
53  
54  
55  
56  
57  
58  
59  
60



## Discussion

### *Statement of principle findings*

Healthcare interventions have positive, albeit modest, effects on HbA1c in poorly controlled T2DM. Interventions targeting those with a higher baseline HbA1c ( $\geq 80$  mmol/mol (9.5%)) show the greatest effects. There was no evidence of a significant impact on blood pressure or lipids, though baseline control of these risk factors was generally good or of an effect on secondary outcomes. Our results suggest that a targeted approach to T2DM management, focussing on individuals with very poor glycaemic control, may represent a prudent strategy for future management.

### *Strengths and weaknesses of the study*

The methodology of our systematic review addresses key credibility issues (65, 66). The research question was sensible, our search of the literature was exhaustive and our results are outlined clearly for primary and secondary outcomes. The effect of baseline HbA1c was consistent across studies, biologically plausible and was an a priori hypothesis (66).

We performed meta-regression to explore the heterogeneity, which also confirmed the increased effectiveness of interventions on those with HbA1c  $\geq 80$  mmol/mol (9.5%). However, a major limitation is that meta-regression is usually underpowered to detect anything but very large associations. Though we do not believe the subgroup findings occurred by chance, there remained high heterogeneity and we explored between-study comparisons rather than within-study comparisons (66). An individual patient data meta-analysis would answer further questions not possible in this review. There was some evidence of publication bias in the SBP analysis, but this was not present for the twenty studies reporting DBP.

This study will inform researchers regarding the range of interventions that have been deployed to target patients with poorly controlled T2DM. There is no specific definition for 'poor control' of T2DM in the literature, but by including all studies

1  
2  
3 that had patients with a HbA1c > 59 mmol/mol (7.5%), we captured the full range of  
4 poor glycaemic control. Studies examining poor control of HbA1c possess a risk of  
5 regression towards the mean. However, all included studies were RCTs with control  
6 groups, which should have accounted for this. Targeted interventions in poorly  
7 controlled T2DM need to be distinguished from interventions, which are designed to  
8 intensively reduce HbA1c in all patients. Though persons with very poor glycaemic  
9 control are also at risk of the adverse effects of hypoglycaemic agents, targeting this  
10 population is more likely to reach the right balance of reducing harms of  
11 overtreatment and maximising potential benefits (18). The relative importance of  
12 targeting glycaemic or cardiovascular risk has been debated in the literature (17).  
13 We did not account for medication use in the studies, but given that all included  
14 studies were RCTs, which would balance out delivery of medications, we think that  
15 differences relating to underlying medication usage relate to how different  
16 interventions types promote the intensification of medications.  
17  
18  
19  
20  
21  
22  
23  
24  
25  
26  
27  
28

### 29 *Comparison with other studies*

30  
31  
32 The existing literature examining healthcare interventions to improve glycaemic  
33 control has focussed on a range of approaches. There have been systematic reviews  
34 of interventions including QI initiatives, education, self-management support, case-  
35 management, adherence to medication and professional interventions, though as  
36 outlined previously most have not specifically targeted patients with poor glycaemic  
37 control (8, 10, 11).  
38  
39  
40  
41  
42

43  
44 A synthesis of 27 systematic reviews and 347 randomised controlled trials identified  
45 the cost-effectiveness of self-management interventions in T2DM. in all patients  
46 with T2DM (67). This overview included studies that targeted all patients with T2DM  
47 and found very good evidence that education improves blood glucose control in  
48 patients with T2DM in the short term (less than 12 months) and that behavioural  
49 and psychological interventions are associated with modest improvements in blood  
50 glucose control (HbA1C) (67, 68).. A review of computer-based diabetes self-  
51 management interventions to manage T2DM reported a small beneficial effect on  
52 blood glucose control (MD of -0.2%) (69). Another recent systematic review of 118  
53  
54  
55  
56  
57  
58  
59  
60

1  
2  
3 self-management interventions found improvements in HbA1c in 62% of studies. The  
4 overall mean effect was to reduce HbA1c by -0.57%, although patients with  
5 persistently elevated HbA1c over 9 had greater improvements (70). In our review,  
6 patient-orientated interventions, such as self-monitoring of blood glucose and self-  
7 management interventions, seemed to be less effective than organisational  
8 interventions.  
9

10  
11  
12  
13  
14 Case management by nurses and other professionals and case management in  
15 socially disadvantaged have been shown to be beneficial when targeted at all  
16 patients with T2DM and our review supports this conclusion for poorly-controlled  
17 populations (5, 71-73). Pharmacist-based interventions have been studied, mainly in  
18 outpatient settings or in US primary care, and have been found to be effective and  
19 cost-effective (74, 75). The five pharmacist interventions in our review, targeting  
20 patients with poorly-controlled T2DM, showed mixed results, but overall had  
21 predominantly positive effects on HbA1c.  
22  
23  
24  
25  
26  
27  
28

29  
30 Attention to, and reporting of, intensification of anti-diabetic medications and  
31 patient's adherence to treatment regimens are needed to achieve optimal glycaemic  
32 control (76, 77). Evidence regarding adherence in T2DM is mixed. A previous  
33 systematic review of twenty one studies that included fourteen RCTs to enhance  
34 T2DM treatment adherence in community and hospital settings found that few  
35 studies measured or assessed adherence and that interventions to improve  
36 adherence did not show benefits or harms (78). A review by Farmer et al. found  
37 limited evidence of effect for interventions promoting the monitoring of medication  
38 use and brief messaging to support medication adherence in patients with T2DM,  
39 though the included studies did not specifically target patients with poorly controlled  
40 diabetes (64). Only nine of the 38 included studies in our review looked at adherence  
41 to medications as an outcome and only two of these nine studies had a statistically  
42 significant effect on adherence (49, 61). The baseline level of adherence varied  
43 considerably and studies used different scale ranges.  
44  
45  
46  
47  
48  
49  
50  
51  
52  
53  
54

55  
56 Our review identified only one professional-based interventions in poorly controlled  
57 T2DM, through a physician decision aid (42). Two systematic reviews have examined  
58  
59  
60

1  
2  
3 the impact of clinical decision support systems (CDSS) on the management of T2DM  
4 in primary care - between them looking at twenty eight trials, with varying results  
5 but none of these CDSS interventions were designed to promote intensification of  
6 prescribing in persons with poor glycaemic control (79, 80).  
7  
8  
9

### 10 *Future research*

11  
12  
13  
14 There is a need for further research examining professional-based interventions in  
15 poorly controlled T2DM, such as CDSS, which promote intensification of medications  
16 (76). Studies from jurisdictions outside North America on poorly controlled  
17 populations would also be welcome. It is likely that most successful interventions  
18 have their impact as a result of intensification of medicines and/ or improving  
19 adherence to medicines (76). As adherence was not measured in most of the studies  
20 and intensification poorly documented, it is important that future interventions  
21 report on these findings. Furthermore organisational interventions could incur  
22 significant costs to a health system so cost-effectiveness analyses on future  
23 interventions should be undertaken to ensure the modest improvements in HbA1c  
24 are beneficial for the health systems.  
25  
26  
27  
28  
29  
30  
31  
32  
33  
34

35 In conclusion, clinicians and policy makers, when considering organisation of care for  
36 T2DM should focus their effects on those patients with very poor glycaemic control  
37 ( $\geq 80$  mmol/mol (9.5%)). Prioritising interventions that emphasise structured  
38 organisation of care, which can include intensification and adherence to  
39 medications, also seem more likely to deliver optimal results in terms of glycaemic  
40 control for T2DM patients.  
41  
42  
43  
44  
45  
46  
47  
48  
49

### 50 **Acknowledgements**

51  
52 Nil  
53  
54  
55  
56  
57  
58  
59  
60

## References

1. Wild S, Roglic G, Green A, et al. Global prevalence of diabetes: estimates for the year 2000 and projections for 2030. *Diabetes Care*. 2004;27(5):1047-53.
2. Spann SJ, Nutting PA, Galliher JM, et al. Management of type 2 diabetes in the primary care setting: a practice-based research network study. *Ann Fam Med*. 2006;4(1):23-31.
3. Campbell DJ, McGrady M, Prior DL, et al. Most individuals with treated blood pressures above target receive only one or two antihypertensive drug classes. *Intern Med J*. 2013;43(2):137-43.
4. Stratton IM, Adler AI, Neil HA, et al. Association of glycaemia with macrovascular and microvascular complications of type 2 diabetes (UKPDS 35): prospective observational study. *Bmj*. 2000;321(7258):405-12.
5. Stelfox M, Dipnarine K, Stopka C. The chronic care model and diabetes management in US primary care settings: a systematic review. *Prev Chronic Dis*. 2013;10:E26.
6. Mays N. Reducing unwarranted variations in healthcare in the English NHS. *Bmj*. 2011;342:d1849.
7. Simmons RK, Carlsen AH, Griffin SJ, et al. Variation in prescribing of lipid-lowering medication in primary care is associated with incidence of cardiovascular disease and all-cause mortality in people with screen-detected diabetes: findings from the ADDITION-Denmark trial. *Diabet Med*. 2014.
8. Seitz P, Rosemann T, Gensichen J, Huber CA. Interventions in primary care to improve cardiovascular risk factors and glycated haemoglobin (HbA1c) levels in patients with diabetes: a systematic review. *Diabetes Obes Metab*. 2011;13(6):479-89.
9. Renders CM, Valk GD, Griffin SJ, et al. Interventions to improve the management of diabetes in primary care, outpatient, and community settings: a systematic review. *Diabetes Care*. 2001;24(10):1821-33.
10. Seidu S, Walker NS, Bodicoat DH, et al. A systematic review of interventions targeting primary care or community based professionals on cardio-metabolic risk factor control in people with diabetes. *Diabetes Res Clin Pract*. 2016;113:1-13.

11. Tricco AC, Ivers NM, Grimshaw JM, et al. Effectiveness of quality improvement strategies on the management of diabetes: a systematic review and meta-analysis. *Lancet*. 2012;379(9833):2252-61.
12. Patel A, MacMahon S, Chalmers J, et al. Intensive blood glucose control and vascular outcomes in patients with type 2 diabetes. *N Engl J Med*. 2008;358(24):2560-72.
13. Gerstein HC, Miller ME, Byington RP, et al. Effects of intensive glucose lowering in type 2 diabetes. *N Engl J Med*. 2008;358(24):2545-59.
14. Duckworth W, Abraira C, Moritz T, et al. Glucose control and vascular complications in veterans with type 2 diabetes. *N Engl J Med*. 2009;360(2):129-39.
15. Turnbull FM, Abraira C, Anderson RJ, et al. Intensive glucose control and macrovascular outcomes in type 2 diabetes. *Diabetologia*. 2009;52(11):2288-98.
16. Skyler JS, Bergenstal R, Bonow RO, et al. Intensive glycemic control and the prevention of cardiovascular events: implications of the ACCORD, ADVANCE, and VA Diabetes Trials: a position statement of the American Diabetes Association and a Scientific Statement of the American College of Cardiology Foundation and the American Heart Association. *J Am Coll Cardiol*. 2009;53(3):298-304.
17. Hayward RA, Reaven PD, Wiitala WL, et al. Follow-up of glycemic control and cardiovascular outcomes in type 2 diabetes. *N Engl J Med*. 2015;372(23):2197-206.
18. Hayward RA. Excessive testing of adults with type 2 diabetes. *Bmj*. 2015;351:h6549.
19. Mossello E. Targeting Vascular Risk Factors in Older Adults: From Polypill to Personalized Prevention. *JAMA Intern Med*. 2015;175(12):1949-50.
20. Murphy M, Galvin R, Fahey T, Smith S. Effectiveness of interventions in primary care to improve glycosylated haemoglobin (HbA1c) and cardiovascular risk factor levels in patients with poorly-controlled type 2 diabetes mellitus: a systematic review. PROSPERO. 2014;CRD42014014442.
21. Effective Practice and Organisation of Care. EPOC Intervention types. Norwegian Knowledge Centre for the Health Services. 2015;Accessed on 13th April 2016: [https://epoc.cochrane.org/sites/epoc.cochrane.org/files/uploads/EPOC\\_Taxonomy\\_of\\_Interventions\\_2002.pdf](https://epoc.cochrane.org/sites/epoc.cochrane.org/files/uploads/EPOC_Taxonomy_of_Interventions_2002.pdf).

- 1  
2  
3 22. Keogh KM, Smith SM, White P, et al. Psychological family intervention for  
4 poorly controlled type 2 diabetes. *Am J Manag Care*. 2011;17(2):105-13.
- 5  
6 23. Krein SL, Klamerus ML, Vijan S, et al. Case management for patients with  
7 poorly controlled diabetes: a randomized trial. *Am J Med*. 2004;116(11):732-9.
- 8  
9 24. McMahon GT, Gomes HE, Hohne SH, et al. Web-based care management in  
10 patients with poorly controlled diabetes. *Diabetes Care*. 2005;28(7):1624-9.
- 11  
12 25. Crowley MJ, Edelman D, McAndrew AT, et al. Effectiveness of a scalable  
13 telemedicine intervention for veterans with persistent poor diabetes control.  
14 *Diabetes*. 2015;64:A80.
- 15  
16 26. Vanselow NA, Donaldson MS, Yordy KD. A new definition of primary care.  
17 *Jama*. 1995;273(3):192.
- 18  
19 27. Effective Practice and Organisation of Care (EPOC). Summary assessments of  
20 the risk of bias. EPOC Resources for review authors Oslo: Norwegian Knowledge  
21 Centre for the Health Services.2013 [Available from: Accessed on 13th April 2016  
22 [http://epoc.cochrane.org/sites/epoc.cochrane.org/files/uploads/16\\_Summary](http://epoc.cochrane.org/sites/epoc.cochrane.org/files/uploads/16_Summary_assessments_of_the_risk_of_bias_2013_08_12_2.pdf)  
23 [assessments\\_of\\_the\\_risk\\_of\\_bias\\_2013\\_08\\_12\\_2.pdf](http://epoc.cochrane.org/sites/epoc.cochrane.org/files/uploads/16_Summary_assessments_of_the_risk_of_bias_2013_08_12_2.pdf).
- 24  
25 28. StataCorp. Stata Statistical Software: Release 13. College Station, TX:  
26 StataCorp LP; 2013.
- 27  
28 29. Thompson SG, Higgins JP. How should meta-regression analyses be  
29 undertaken and interpreted? *Stat Med*. 2002;21(11):1559-73.
- 30  
31 30. Thom DH, Ghorob A, Hessler D, et al. Impact of peer health coaching on  
32 glycemic control in low-income patients with diabetes: a randomized controlled trial.  
33 *Ann Fam Med*. 2013;11(2):137-44.
- 34  
35 31. Taylor CB, Miller NH, Reilly KR, et al. Evaluation of a nurse-care management  
36 system to improve outcomes in patients with complicated diabetes. *Diabetes Care*.  
37 2003;26(4):1058-63.
- 38  
39 32. Tang PC, Overhage JM, Chan AS, et al. Online disease management of  
40 diabetes: Engaging and motivating patients online with enhanced resources-diabetes  
41 (EMPOWER-D), a randomized controlled trial. *J Am Med Inform Assoc*.  
42 2013;20(3):526-34.
- 43  
44 33. Sen AP, Sewell TB, Riley EB, et al. Financial incentives for home-based health  
45 monitoring: a randomized controlled trial. *J Gen Intern Med*. 2014;29(5):770-7.
- 46  
47  
48  
49  
50  
51  
52  
53  
54  
55  
56  
57  
58  
59  
60

- 1  
2  
3 34. Schillinger D, Handley M, Wang F, Hammer H. Effects of Self-Management  
4 Support on Structure, Process, and Outcomes Among Vulnerable Patients With  
5 Diabetes A three-arm practical clinical trial. *Diabetes Care*. 2009;32(4):559-66.  
6  
7  
8 35. Rothman RL, Malone R, Bryant B, et al. A randomized trial of a primary care-  
9 based disease management program to improve cardiovascular risk factors and  
10 glycated hemoglobin levels in patients with diabetes. *Am J Med*. 2005;118(3):276-84.  
11  
12 36. Quinn CC, Shardell MD, Terrin ML, et al. Cluster-randomized trial of a mobile  
13 phone personalized behavioral intervention for blood glucose control. *Diabetes Care*.  
14 2011;34(9):1934-42.  
15  
16 37. Polonsky WH, Fisher L, Schikman CH, et al. A structured self-monitoring of  
17 blood glucose approach in type 2 diabetes encourages more frequent, intensive, and  
18 effective physician interventions: results from the STeP study. *Diabetes Technol  
19 Ther*. 2011;13(8):797-802.  
20  
21 38. Philis-Tsimikas A, Fortmann A, Lleba-Ocana L, et al. Peer-Led Diabetes  
22 Education Programs in High-Risk Mexican Americans Improve Glycemic Control  
23 Compared With Standard Approaches A Project Dulce promotora randomized trial.  
24 *Diabetes Care*. 2011;34(9):1926-31.  
25  
26 39. Palmas W, Findley SE, Mejia M, et al. Results of the northern Manhattan  
27 diabetes community outreach project: a randomized trial studying a community  
28 health worker intervention to improve diabetes care in Hispanic adults. *Diabetes  
29 Care*. 2014;37(4):963-9.  
30  
31 40. Odegard PS, Goo A, Hummel J, et al. Caring for poorly controlled diabetes  
32 mellitus: a randomized pharmacist intervention. *Ann Pharmacother*. 2005;39(3):433-  
33 40.  
34  
35 41. Mons U, Raum E, Kramer HU, et al. Effectiveness of a Supportive Telephone  
36 Counseling Intervention in Type 2 Diabetes Patients: Randomized Controlled Study.  
37 *Plos One*. 2013;8(10).  
38  
39 42. Mathers N, Ng CJ, Campbell MJ, et al. Clinical effectiveness of a patient  
40 decision aid to improve decision quality and glycaemic control in people with  
41 diabetes making treatment choices: a cluster randomised controlled trial (PANDAs)  
42 in general practice. *BMJ Open*. 2012;2(6).  
43  
44  
45  
46  
47  
48  
49  
50  
51  
52  
53  
54  
55  
56  
57  
58  
59  
60



- 1  
2  
3 43. Maislos M, Weisman D. Multidisciplinary approach to patients with poorly  
4 controlled type 2 diabetes mellitus: a prospective, randomized study. *Acta Diabetol.*  
5 2004;41(2):44-8.  
6  
7  
8 44. Long JA, Jahnle EC, Richardson DM, et al. Peer mentoring and financial  
9 incentives to improve glucose control in African American veterans: a randomized  
10 trial. *Ann Intern Med.* 2012;156(6):416-24.  
11  
12 45. Kim MT, Han HR, Song HJ, et al. A community-based, culturally tailored  
13 behavioral intervention for Korean Americans with type 2 diabetes. *Diabetes Educ.*  
14 2009;35(6):986-94.  
15  
16 46. Jovanovic L, Cali Medi-Cal type2 Diabet Stu G. Closing the gap: Effect of  
17 diabetes case management on glycemic control among low-income ethnic minority  
18 populations - The California Medi-Cal type 2 diabetes study. *Diabetes Care.*  
19 2004;27(1):95-103.  
20  
21 47. Jameson JP, Baty PJ. Pharmacist collaborative management of poorly  
22 controlled diabetes mellitus: a randomized controlled trial. *Am J Manag Care.*  
23 2010;16(4):250-5.  
24  
25 48. Jacobs M, Sherry PS, Taylor LM, et al. Pharmacist Assisted Medication  
26 Program Enhancing the Regulation of Diabetes (PAMPERED) study. *J Am Pharm*  
27 *Assoc (2003).* 2012;52(5):613-21.  
28  
29 49. Heisler M, Vijan S, Makki F, Piette JD. Diabetes control with reciprocal peer  
30 support versus nurse care management: a randomized trial. *Ann Intern Med.*  
31 2010;153(8):507-15.  
32  
33 50. Guerci B, Drouin P, Grange V, et al. Self-monitoring of blood glucose  
34 significantly improves metabolic control in patients with type 2 diabetes mellitus: the  
35 Auto-Surveillance Intervention Active (ASIA) study. *Diabetes Metab.* 2003;29(6):587-  
36 94.  
37  
38 51. Frosch DL, Uy V, Ochoa S, Mangione CM. Evaluation of a behavior support  
39 intervention for patients with poorly controlled diabetes. *Arch Intern Med.*  
40 2011;171(22):2011-7.  
41  
42 52. Forjuoh SN, Bolin JN, Huber Jr JC, et al. Behavioral and technological  
43 interventions targeting glycemic control in a racially/ethnically diverse population: A  
44 randomized controlled trial. *BMC Public Health.* 2014;14(1).  
45  
46  
47  
48  
49  
50  
51  
52  
53  
54  
55  
56  
57  
58  
59  
60

- 1  
2  
3 53. Farmer A, Hardeman W, Hughes D, et al. An explanatory randomised  
4 controlled trial of a nurse-led, consultation-based intervention to support patients  
5 with adherence to taking glucose lowering medication for type 2 diabetes. *Bmc*  
6 *Family Practice*. 2012;13.  
7  
8  
9  
10 54. Edelman D, Fredrickson SK, Melnyk SD, et al. Medical clinics versus usual care  
11 for patients with both diabetes and hypertension: a randomized trial. *Ann Intern*  
12 *Med*. 2010;152(11):689-96.  
13  
14  
15 55. DePue JD, Dunsiger S, Seiden AD, et al. Nurse-Community Health Worker  
16 Team Improves Diabetes Care in American Samoa Results of a randomized  
17 controlled trial. *Diabetes Care*. 2013;36(7):1947-53.  
18  
19  
20  
21 56. Dale J, Caramlau I, Sturt J, et al. Telephone peer-delivered intervention for  
22 diabetes motivation and support: The telecare exploratory RCT. *Patient Education*  
23 *and Counseling*. 2009;75(1):91-8.  
24  
25  
26 57. Choe HM, Mitrovich S, Dubay D, et al. Proactive case management of high-  
27 risk patients with type 2 diabetes mellitus by a clinical pharmacist: a randomized  
28 controlled trial. *Am J Manag Care*. 2005;11(4):253-60.  
29  
30  
31 58. Blackberry ID, Furler JS, Best JD, et al. Effectiveness of general practice based,  
32 practice nurse led telephone coaching on glycaemic control of type 2 diabetes: the  
33 Patient Engagement and Coaching for Health (PEACH) pragmatic cluster randomised  
34 controlled trial. *Bmj*. 2013;347:f5272.  
35  
36  
37  
38 59. Edelman D, Dolor RJ, Coffman CJ, et al. Nurse-Led Behavioral Management of  
39 Diabetes and Hypertension in Community Practices: A Randomized Trial. *J Gen Intern*  
40 *Med*. 2015;30(5):626-33.  
41  
42  
43 60. Capozza K, Woolsey S, Georgsson M, et al. Going mobile with diabetes  
44 support: a randomized study of a text message-based personalized behavioral  
45 intervention for type 2 diabetes self-care. *Diabetes spectrum* : a publication of the  
46 American Diabetes Association. 2015;28(2):83-91.  
47  
48  
49  
50 61. McDermott RA, Schmidt B, Preece C, et al. Community health workers  
51 improve diabetes care in remote Australian Indigenous communities: results of a  
52 pragmatic cluster randomized controlled trial. *BMC Health Serv Res*. 2015;15.  
53  
54  
55  
56  
57  
58  
59  
60

- 1  
2  
3 62. O'Connor PJ, Schmittiel JA, Pathak RD, et al. Randomized trial of telephone  
4 outreach to improve medication adherence and metabolic control in adults with  
5 diabetes. *Diabetes Care*. 2014;37(12):3317-24.  
6  
7  
8 63. Sugiyama T, Steers WN, Wenger NS, et al. Effect of a community-based  
9 diabetes self-management empowerment program on mental health-related quality  
10 of life: a causal mediation analysis from a randomized controlled. *BMC Health Serv*  
11 *Res*. 2015;15.  
12  
13 64. Farmer AJ, McSharry J, Rowbotham S, et al. Effects of interventions  
14 promoting monitoring of medication use and brief messaging on medication  
15 adherence for people with Type 2 diabetes: a systematic review of randomized trials.  
16 *Diabet Med*. 2015.  
17  
18 65. Murad MH, Montori VM, Ioannidis JP, et al. How to read a systematic review  
19 and meta-analysis and apply the results to patient care: users' guides to the medical  
20 literature. *Jama*. 2014;312(2):171-9.  
21  
22 66. Sun X, Ioannidis JP, Agoritsas T, et al. How to use a subgroup analysis: users'  
23 guide to the medical literature. *Jama*. 2014;311(4):405-11.  
24  
25 67. Health and Information and Quality Authority. Health technology assessment  
26 of chronic disease self- management support interventions. 2015.  
27  
28 68. Ismail K, Winkley K, Rabe-Hesketh S. Systematic review and meta-analysis of  
29 randomised controlled trials of psychological interventions to improve glycaemic  
30 control in patients with type 2 diabetes. *Lancet*. 2004;363(9421):1589-97.  
31  
32 69. Pal K, Eastwood SV, Michie S, et al. Computer-based interventions to improve  
33 self-management in adults with type 2 diabetes: a systematic review and meta-  
34 analysis. *Diabetes Care*. 2014;37(6):1759-66.  
35  
36 70. Chryala CA, Sherr D, Lipman RD. Diabetes self-management education for  
37 adults with type 2 diabetes mellitus: A systematic review of the effect on glycemic  
38 control. *Patient Educ Couns*. 2015.  
39  
40 71. Norris SL, Nichols PJ, Caspersen CJ, et al. The effectiveness of disease and  
41 case management for people with diabetes. A systematic review. *Am J Prev Med*.  
42 2002;22(4 Suppl):15-38.  
43  
44  
45  
46  
47  
48  
49  
50  
51  
52  
53  
54  
55  
56  
57  
58  
59  
60

- 1  
2  
3 72. Glazier RH, Bajcar J, Kennie NR, Willson K. A systematic review of  
4 interventions to improve diabetes care in socially disadvantaged populations.  
5 Diabetes Care. 2006;29(7):1675-88.  
6  
7  
8 73. Saxena S, Misra T, Car J, et al. Systematic review of primary healthcare  
9 interventions to improve diabetes outcomes in minority ethnic groups. J Ambul Care  
10 Manage. 2007;30(3):218-30.  
11  
12 74. Wang Y, Yeo QQ, Ko Y. Economic evaluations of pharmacist-managed services  
13 in people with diabetes mellitus: a systematic review. Diabet Med. 2015.  
14  
15 75. Santschi V, Chiolero A, Paradis G, et al. Pharmacist interventions to improve  
16 cardiovascular disease risk factors in diabetes: a systematic review and meta-analysis  
17 of randomized controlled trials. Diabetes Care. 2012;35(12):2706-17.  
18  
19 76. Krass I, Schieback P, Dhippayom T. Adherence to diabetes medication: a  
20 systematic review. Diabet Med. 2015;32(6):725-37.  
21  
22 77. Cramer JA. A systematic review of adherence with medications for diabetes.  
23 Diabetes Care. 2004;27(5):1218-24.  
24  
25 78. Vermeire E, Wens J, Van Royen P, et al. Interventions for improving  
26 adherence to treatment recommendations in people with type 2 diabetes mellitus.  
27 Cochrane Database Syst Rev. 2005(2):Cd003638.  
28  
29 79. Cleveringa FG, Gorter KJ, van den Donk M, et al. Computerized decision  
30 support systems in primary care for type 2 diabetes patients only improve patients'  
31 outcomes when combined with feedback on performance and case management: a  
32 systematic review. Diabetes Technol Ther. 2013;15(2):180-92.  
33  
34 80. Jeffery R, Iserman E, Haynes RB. Can computerized clinical decision support  
35 systems improve diabetes management? A systematic review and meta-analysis.  
36 Diabet Med. 2012;30(6):739-45.  
37  
38  
39  
40  
41  
42  
43  
44  
45  
46  
47  
48  
49  
50  
51  
52  
53  
54  
55  
56  
57  
58  
59  
60

Figure 1: PRISMA Flow Sheet

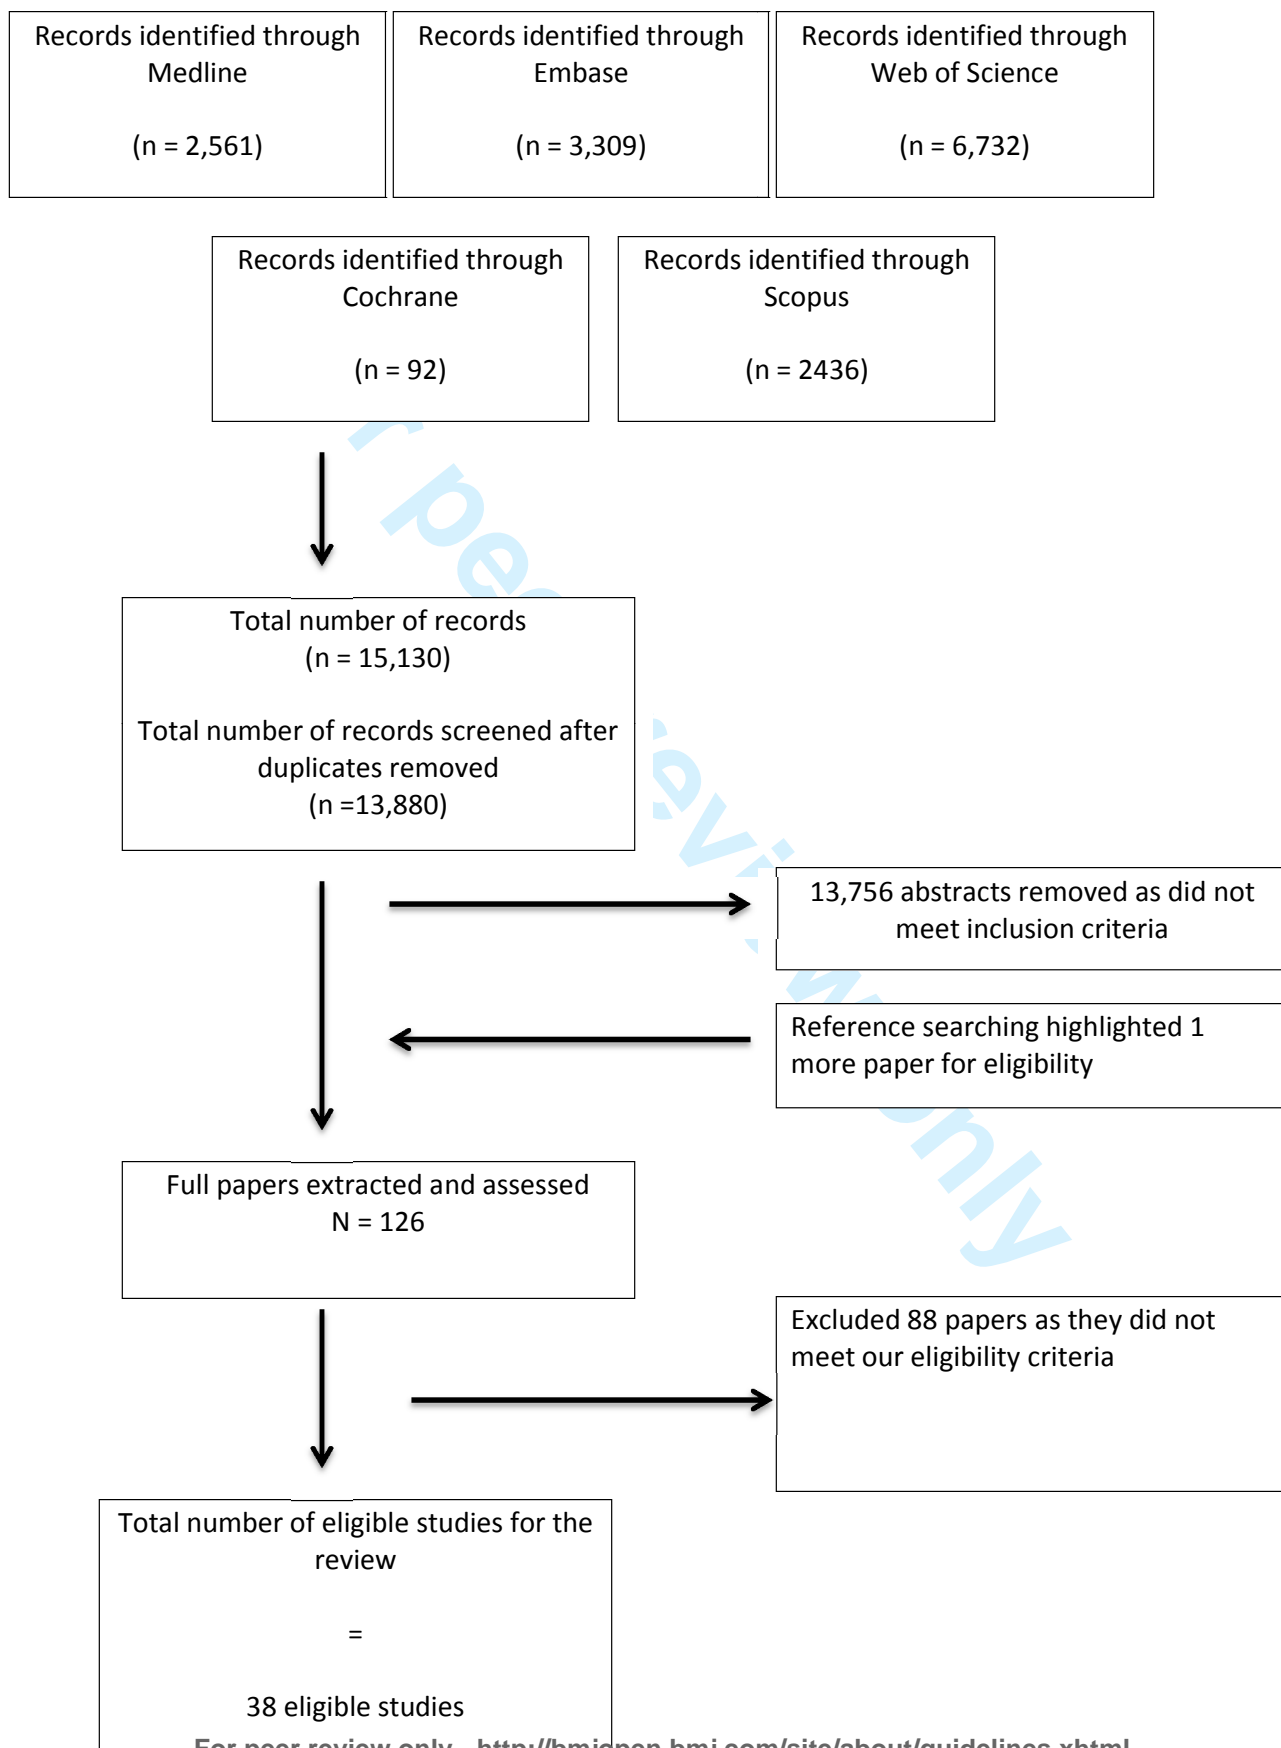

1  
2  
3  
4  
5  
6  
7  
8  
9  
10  
11  
12  
13  
14  
15  
16  
17  
18  
19  
20  
21  
22  
23  
24  
25  
26  
27  
28  
29  
30  
31  
32  
33  
34  
35  
36  
37  
38  
39  
40  
41  
42  
43  
44  
45  
46  
47  
48  
49  
50  
51  
52  
53  
54  
55  
56  
57  
58  
59  
60

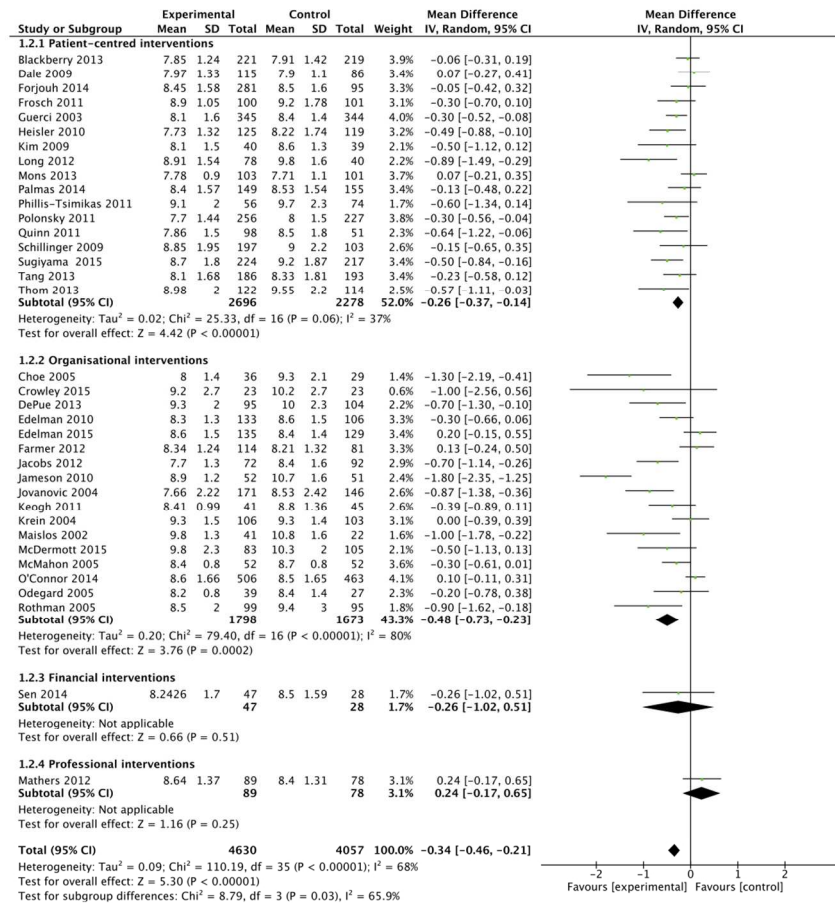

Figure 2a. Effects of interventions on HbA1c, with intervention-type subgroups

215x279mm (150 x 150 DPI)

1  
2  
3  
4  
5  
6  
7  
8  
9  
10  
11  
12  
13  
14  
15  
16  
17  
18  
19  
20  
21  
22  
23  
24  
25  
26  
27  
28  
29  
30  
31  
32  
33  
34  
35  
36  
37  
38  
39  
40  
41  
42  
43  
44  
45  
46  
47  
48  
49  
50  
51  
52  
53  
54  
55  
56  
57  
58  
59  
60

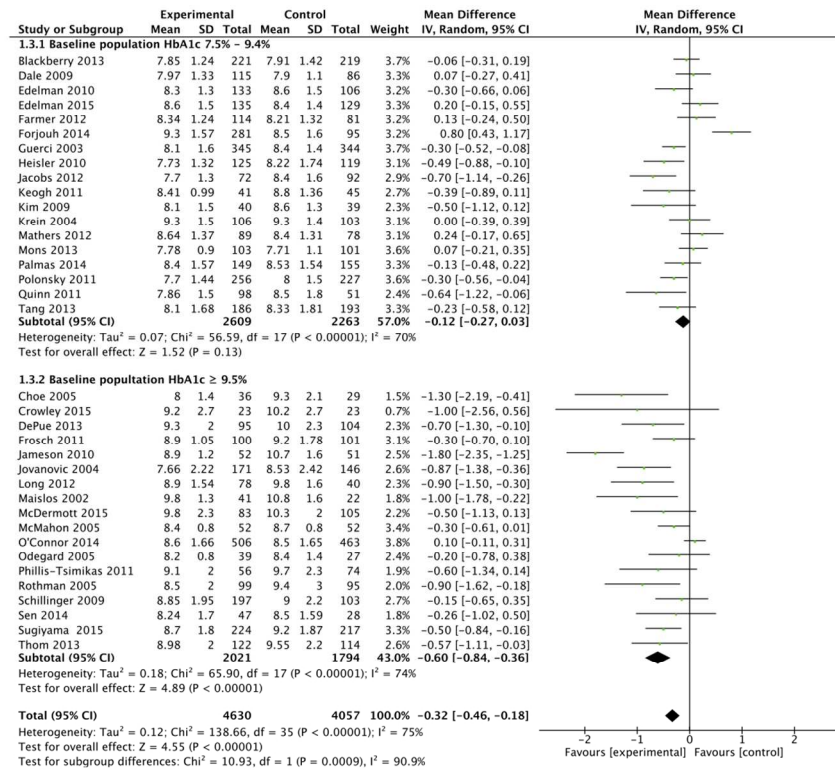

Figure 2b. Effects of interventions on HbA1c, with baseline HbA1c subgroups

215x279mm (150 x 150 DPI)

1  
2  
3  
4  
5  
6  
7  
8  
9  
10  
11  
12  
13  
14  
15  
16  
17  
18  
19  
20  
21  
22  
23  
24  
25  
26  
27  
28  
29  
30  
31  
32  
33  
34  
35  
36  
37  
38  
39  
40  
41  
42  
43  
44  
45  
46  
47  
48  
49  
50  
51  
52  
53  
54  
55  
56  
57  
58  
59  
60

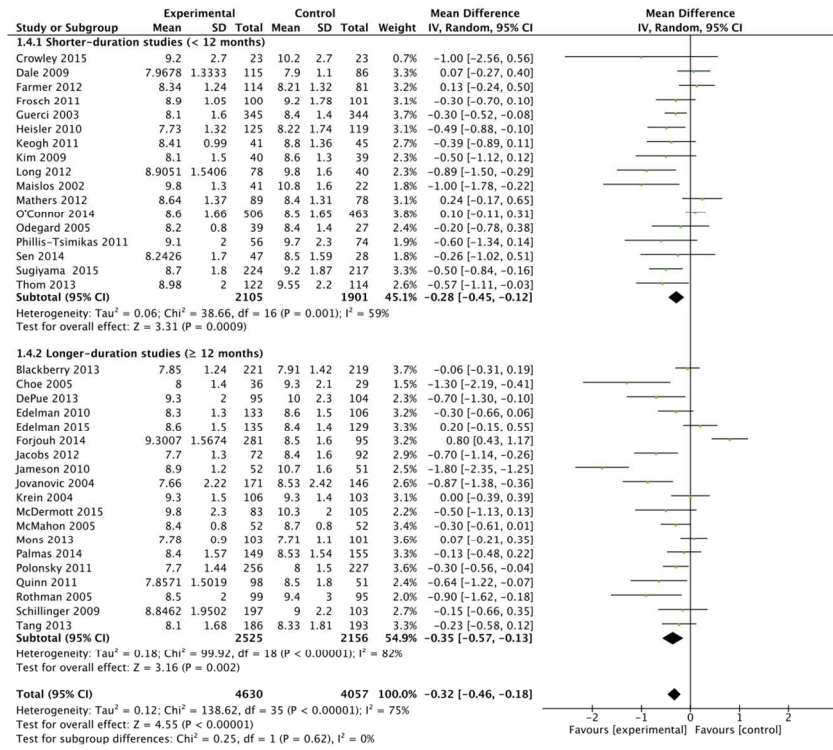

Figure 2c. Effects of interventions on HbA1c, with study quality subgroups

215x279mm (150 x 150 DPI)



1  
2  
3  
4  
5  
6  
7  
8  
9  
10  
11  
12  
13  
14  
15  
16  
17  
18  
19  
20  
21  
22  
23  
24  
25  
26  
27  
28  
29  
30  
31  
32  
33  
34  
35  
36  
37  
38  
39  
40  
41  
42  
43  
44  
45  
46  
47  
48  
49  
50  
51  
52  
53  
54  
55  
56  
57  
58  
59  
60

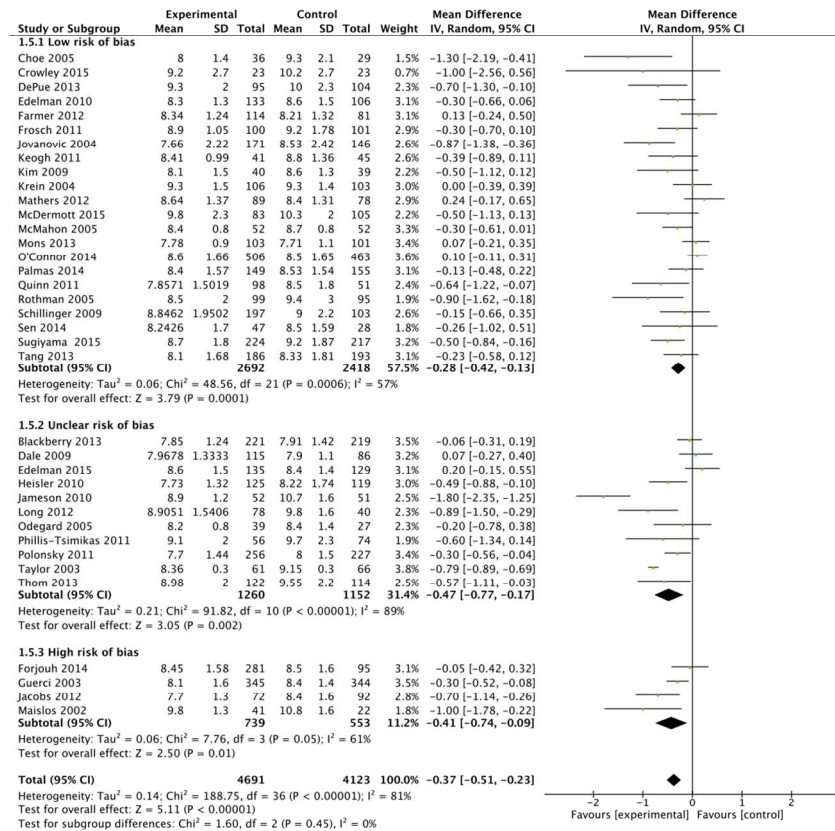

Figure 2d. Effects of interventions on HbA1c, with study duration subgroups

215x279mm (150 x 150 DPI)

**Table 1: Characteristics of included studies**

| Study ID<br>Author,<br>Year<br>Country       | Patient participants<br>Total patients (n) Intervention (n) Control (n)<br>Age (mean, unless stated)<br>Gender (% male, unless stated)<br>HbA1c cutoff of 'poor control'<br>Baseline HbA1c level (mean)<br>Baseline BP (mean)<br>% on insulin at baseline<br>Diabetes duration: (years)<br><b>Practitioner and practice participants</b>    | Brief intervention description                                                  | Predominant<br>Intervention<br>type | Outcomes:<br>Primary<br>Secondary                                                                                                                                                                                                                                                                                                          | Study<br>duration<br>Months |
|----------------------------------------------|---------------------------------------------------------------------------------------------------------------------------------------------------------------------------------------------------------------------------------------------------------------------------------------------------------------------------------------------|---------------------------------------------------------------------------------|-------------------------------------|--------------------------------------------------------------------------------------------------------------------------------------------------------------------------------------------------------------------------------------------------------------------------------------------------------------------------------------------|-----------------------------|
| Blackberry<br>2013<br>Victoria,<br>Australia | <b>Patient participants</b><br>473 Patients (236 Intervention and 237 Control)<br>Mean age: 62.8<br>% male: 57%<br>T2DM with HbA1c > 7.5%<br>Mean HbA1c: 8.06<br>Mean BP: NR<br>% insulin baseline: 27%<br>Mean diabetes duration 10 (5-14 range)<br><b>Practitioner and practice participants</b><br>59 practices<br>Practice-based nurses | Telephone coaching by nurses to support diabetes management and self monitoring | Patient-centred                     | Primary outcomes:<br>HbA1c at 18 months<br><br>Secondary outcomes: Lipid and TAG profile; eGFR and urine ACR; BP; BMI; waist circumference; smoking status; Quality of Life; Diabetes Self efficacy; Diabetes support; Depression status; Intensification of diabetes.<br>Others: Health service utilization; Physical activity, Nutrition | 18 months                   |
| Capozza<br>2015<br>USA                       | <b>Patient participants</b><br>93 patients (58 Intervention; 35 Control)<br>Mean age: 58.7<br>% male: 35.5%<br>T2DM with HbA1c > 8%<br>Mean Baseline HbA1c 9.1%<br>Mean Baseline BP: NR<br>% insulin baseline: NR<br>Diabetes duration: NR<br><b>Practitioner and practice participants</b><br>Recruited from 18 primary clinics            | Text-message based behavioural intervention for T2DM                            | Patient-centred                     | Primary outcome:<br>Change in HbA1c from day 0 to day 180<br><br>Secondary outcomes:<br>Patient interaction and satisfaction (CSQ8) with the program                                                                                                                                                                                       | 6 months                    |
| Choe                                         | <b>Patient participants</b><br>80 patients (41 Intervention and 39 Control)                                                                                                                                                                                                                                                                 | Pharmacist case management                                                      | Organisational.                     | Primary outcome:<br>HbA1c level at 12 months                                                                                                                                                                                                                                                                                               | 12 month<br>intervention    |

|                                            |                                                                                                                                                                                                                                                                                                                                                                                                                                                                                                                                                              |                                                                                                                                            |                         |                                                                                                                                                                                                                                                      |                                                                                      |
|--------------------------------------------|--------------------------------------------------------------------------------------------------------------------------------------------------------------------------------------------------------------------------------------------------------------------------------------------------------------------------------------------------------------------------------------------------------------------------------------------------------------------------------------------------------------------------------------------------------------|--------------------------------------------------------------------------------------------------------------------------------------------|-------------------------|------------------------------------------------------------------------------------------------------------------------------------------------------------------------------------------------------------------------------------------------------|--------------------------------------------------------------------------------------|
| 2005<br>USA                                | <p>Age: 51.0 (all less 70)<br/>% male: 46%<br/>HbA1c <math>\geq</math> 8.0%<br/>Mean HbA1c 10.1<br/>Mean BP: NR<br/>% insulin baseline: 30%<br/>Diabetes duration: NR</p> <p><b>Practitioner and practice participants</b></p> <ul style="list-style-type: none"> <li>1 clinic</li> <li>1 pharmacist case manager</li> </ul>                                                                                                                                                                                                                                 |                                                                                                                                            |                         | <p>Secondary outcomes: Rates of diabetes process measures (LDL, dilated retinal examination, urine ACR or use of ACE Inhibitors, monofilament testing for diabetic neuropathy, by chart review over 24 months); Rate of HbA1c measurement.</p>       | <p>with primary outcome reporting at 12 months and a further 24 month follow up.</p> |
| Crowley<br>2015<br>USA                     | <p><b>Patient participants</b><br/>50 patients (25 Intervention and 25 Control)<br/>Age: 60<br/>% male: 24%<br/>HbA1c &gt; 9%<br/>Definition: Yes, defined as 'persistently poor diabetes'<br/>Mean HbA1c 10.5%<br/>Mean SBP: 127/ 80<br/>% insulin baseline: NR<br/>Diabetes duration: 12</p> <p><b>Practitioner and practice participants</b><br/>Patients all receiving care by Durham VA primary care and endocrinology</p>                                                                                                                              | <p>Intensive telemedicine intervention for veterans</p>                                                                                    | <p>Organisational</p>   | <p>Primary outcome:<br/>HbA1c</p> <p>Secondary outcomes: Diabetes self-management (Self-care inventory revised); Depression (PHQ-9); Self reported medication adherence (Morisky medication adherence); BP; Adverse events; Telephone encounters</p> | <p>6 months</p>                                                                      |
| Dale<br>2009<br>England<br>Exploratory RCT | <p><b>Patient participants</b><br/>231 (90 (PS) Intervention 1, 44 (NS) Intervention 2 and 97 Control)<br/>Age: No mean age provided, but wide spectrum of ages from below 50 to over 70 in each of the intervention and control groups.<br/>% male: 57%<br/>HbA1c <math>\geq</math> 7.5%<br/>Mean HbA1c: 8.6%<br/>Mean BP: NR<br/>% insulin baseline: 0%<br/>Diabetes duration: No mean, but between 1- 15 years mostly.</p> <p><b>Practitioner and practice participants</b><br/>29 practices<br/>Peer coaching or diabetes specialist nurse delivered</p> | <p>Two intervention telecare groups:</p> <p>a) Peer-support telecare intervention</p> <p>b) Diabetic specialist nurse telecare support</p> | <p>Patient-centred.</p> | <p>Primary outcome:<br/>Self efficacy (DMSES)</p> <p>Secondary outcomes: HbA1c; Cholesterol; BMI. Diabetes distress (PAID)</p>                                                                                                                       | <p>6 months</p>                                                                      |

|                                                                    |                                                                                                                                                                                                                                                                                                                                                                                                                                                                                      |                                                                                                                                          |                 |                                                                                                                                                                                                                                        |           |
|--------------------------------------------------------------------|--------------------------------------------------------------------------------------------------------------------------------------------------------------------------------------------------------------------------------------------------------------------------------------------------------------------------------------------------------------------------------------------------------------------------------------------------------------------------------------|------------------------------------------------------------------------------------------------------------------------------------------|-----------------|----------------------------------------------------------------------------------------------------------------------------------------------------------------------------------------------------------------------------------------|-----------|
|                                                                    |                                                                                                                                                                                                                                                                                                                                                                                                                                                                                      |                                                                                                                                          |                 |                                                                                                                                                                                                                                        |           |
| DePue<br>2013<br>U.S. Territory of America<br>Somoa<br>Cluster RCT | <p><b>Patient participants</b><br/>268 patients (104 Intervention and 164 Control)<br/>Age: 55<br/>% male: 38%</p> <p>Intervention did not target poor control per se, mean baseline HbA1c of 9.6% (SD of 2.1%) was deemed eligible for inclusion<br/>Mean HbA1c 9.8<br/>Mean BP: 133/ 84<br/>% insulin baseline: NR<br/>Mean diabetes duration: NR</p> <p><b>Practitioner and practice participants</b><br/>Cluster RCT based upon twelve village units<br/>Nurse care managers</p> | Nurse–Community Health Worker Team in American Somoa                                                                                     | Organisational. | <p>Primary outcome:<br/>HbA1c</p> <p>Secondary outcomes: BP; BMI; Dietary intake; Medication adherence; Physical activity; Adapted measures of diabetes beliefs</p>                                                                    | 12 months |
| Edelman<br>2010<br>North Carolina and Virginia, USA.               | <p><b>Patient participants</b><br/>239 patients (133 Intervention and 106 Control)<br/>Age: 61.9<br/>% male: 96%<br/>T2DM HbA1c &gt;7.5 AND (SPB &gt; 140 DBP &gt; 90)<br/>Mean HbA1c: 9.2%<br/>Mean BP: 152/ 84<br/>% insulin baseline: unclear<br/>Duration of diabetes: NR</p> <p><b>Practitioner and practice participants</b><br/>2 VA centres<br/>A care team involving internist, pharmacist, a nurse and educator</p>                                                        | Enrollment into a general medical clinic (GMC) with an internist, pharmacist and a nurse or educator that met seven times over 12 months | Organisational. | <p>Primary outcomes:<br/>HbA1c</p> <p>Secondary outcomes: Systolic blood pressure; Adherence to medications; Self-efficacy; Adverse events through structured self report and medical record review; Health utilization; Cost data</p> | 12 months |
| Edelman<br>2015<br>USA                                             | <p><b>Patient participants</b><br/>377 patients (193 Intervention and 184 Control)<br/>Age: 58.7<br/>% male: 45.4%<br/>HbA1c ≥ 7.5 (and HTN)<br/>Mean HbA1c 9.1%<br/>Mean BP: 142.2/ 80.7<br/>% insulin baseline: NR<br/>Diabetes duration: NR</p> <p><b>Practitioner and practice participants</b></p>                                                                                                                                                                              | Nurse case management                                                                                                                    | Organisational  | <p>Primary outcome:<br/>HbA1c</p> <p>Secondary outcomes: BP; Weight; Physical activity; Self-efficacy; Health literacy; Medication adherence (via self report)</p>                                                                     | 24 months |

|                         |                                                                                                                                                                                                                                                                                                                                                                                                                           |                                                                                                                                                                                                                                                    |                 |                                                                                                                                                                                                                                                                                                                                                                                                                                     |                                                          |
|-------------------------|---------------------------------------------------------------------------------------------------------------------------------------------------------------------------------------------------------------------------------------------------------------------------------------------------------------------------------------------------------------------------------------------------------------------------|----------------------------------------------------------------------------------------------------------------------------------------------------------------------------------------------------------------------------------------------------|-----------------|-------------------------------------------------------------------------------------------------------------------------------------------------------------------------------------------------------------------------------------------------------------------------------------------------------------------------------------------------------------------------------------------------------------------------------------|----------------------------------------------------------|
|                         | 9 primary care practices in Duke.                                                                                                                                                                                                                                                                                                                                                                                         |                                                                                                                                                                                                                                                    |                 |                                                                                                                                                                                                                                                                                                                                                                                                                                     |                                                          |
| Farmer<br>2012<br>UK    | <p><b>Patient participants</b><br/>211 patients (126 Intervention and 85 Control)<br/>Age: 63.2<br/>% male: 65%<br/>HbA1c <math>\geq</math> 7.5%<br/>Mean HbA1c: 8.3%<br/>Mean BP: 136.9/ 78.2<br/>% insulin baseline: NR<br/>Mean diabetes duration: 6.8 years</p> <p><b>Practitioner and practice participants</b><br/>13 practices<br/>Practice nurses</p>                                                             | Nurse-led, multilevel intervention to support medication adherence                                                                                                                                                                                 | Organisational  | <p>Primary outcome:<br/>% days over a 12 week period on which the correct number of doses of main glucose lowering medication was taken each day as prescribed.</p> <p>Secondary outcomes: Hba1c at 0 and 20 weeks (from protocol); Functional status as per SF 12 Physical and SF 12 Mental; Diabetes treatment satisfaction and satisfaction with nurse; MARS Self reported adherence (range 5-25); % reporting hypoglycaemia</p> | 12 weeks (intervention was 8 weeks into a 20 week trial) |
| Forjough<br>2014<br>USA | <p><b>Patient participants</b><br/>376 patients (101 Intervention 1 (CDSMP), 81 Intervention 2 (PDA), 99 Intervention 3 (PDA, CDSMP and 95 Control)<br/>Age: 57.6<br/>% male: 44.0%<br/>HbA1c &gt;7.5%<br/>Mean HbA1c: 9.3<br/>Mean BP: 134.8/ 77<br/>% insulin baseline: NR<br/>Mean diabetes duration: NR</p> <p><b>Practitioner and practice participants</b><br/>7 practices involved<br/>Technology intervention</p> | Three intervention groups, reflecting the individual and combined effects of a behavioural and technology intervention; a chronic Disease Self-Management Program (CDSMP) and a diabetes self-care software on a personal digital assistant (PDA). | Patient-centred | <p>Primary:<br/>HbA1c</p> <p>Secondary: BMI; BP; Self management behavioural measures (e.g. foot care)</p>                                                                                                                                                                                                                                                                                                                          | 12 months                                                |
| Frosch<br>2011<br>USA   | <p><b>Patient participants</b><br/>201 patients (100 Intervention and 101 Control)<br/>Age: 55.5<br/>% male: 51.5%<br/>HbA1c &gt; 8.0<br/>Mean HbA1c: 9.6%<br/>Mean BP: 127.7/ 74.0<br/>% insulin baseline: NR<br/>Mean diabetes duration: 9.5</p> <p><b>Practitioner and practice participants</b><br/>3 academic primary care practices and 1 community based safety net clinic<br/>Nurse educators</p>                 | A video behavioural support intervention by nurse educators with a workbook followed by 5 sessions of telephone coaching.                                                                                                                          | Patient-centred | <p>Primary:<br/>HbA1c</p> <p>Secondary: LDL Cholesterol; BP; BMI; Prescribed medications; Diabetes knowledge (23 point Diabetes knowledge test); Self-care behaviours (SDSCA)</p>                                                                                                                                                                                                                                                   | Unclear, possibly over 6 months                          |

|    |         |                                                                                                                                                                                                                                                                                                                                                                       |                                                                                                            |                                                                                                                                                                                                  |           |
|----|---------|-----------------------------------------------------------------------------------------------------------------------------------------------------------------------------------------------------------------------------------------------------------------------------------------------------------------------------------------------------------------------|------------------------------------------------------------------------------------------------------------|--------------------------------------------------------------------------------------------------------------------------------------------------------------------------------------------------|-----------|
| 1  |         |                                                                                                                                                                                                                                                                                                                                                                       |                                                                                                            |                                                                                                                                                                                                  |           |
| 2  |         |                                                                                                                                                                                                                                                                                                                                                                       |                                                                                                            |                                                                                                                                                                                                  |           |
| 3  |         |                                                                                                                                                                                                                                                                                                                                                                       |                                                                                                            |                                                                                                                                                                                                  |           |
| 4  |         |                                                                                                                                                                                                                                                                                                                                                                       |                                                                                                            |                                                                                                                                                                                                  |           |
| 5  |         |                                                                                                                                                                                                                                                                                                                                                                       |                                                                                                            |                                                                                                                                                                                                  |           |
| 6  |         |                                                                                                                                                                                                                                                                                                                                                                       |                                                                                                            |                                                                                                                                                                                                  |           |
| 7  |         |                                                                                                                                                                                                                                                                                                                                                                       |                                                                                                            |                                                                                                                                                                                                  |           |
| 8  | Guerci  | <b>Patient participants</b><br>988 patients (510 Intervention and 478 Control)<br>Age: 60.6<br>% male: 53.7%<br>HbA1c $\geq$ (7.5 and 11) diabetes.<br>Mean HbA1c 8.95%<br>Mean SBP: 139.6, 80.4<br>% insulin baseline: 0%<br>Mean diabetes duration months: 96.6<br><b>Practitioner and practice participants</b><br>265 GPs involved, uncertain number of practices | A self-monitoring of blood glucose intervention<br><br>Auto-Surveillance Intervention Active (ASIA) study. | Patient-centred<br><br>Primary:<br>HbA1c<br><br>Secondary: Changes in fasting glucose; Symptomatic hyoglycaemia; BP; Weight; Diet; Drugs; Adverse drug event                                     | 6 months  |
| 9  | 2003    |                                                                                                                                                                                                                                                                                                                                                                       |                                                                                                            |                                                                                                                                                                                                  |           |
| 10 | France  |                                                                                                                                                                                                                                                                                                                                                                       |                                                                                                            |                                                                                                                                                                                                  |           |
| 11 |         |                                                                                                                                                                                                                                                                                                                                                                       |                                                                                                            |                                                                                                                                                                                                  |           |
| 12 |         |                                                                                                                                                                                                                                                                                                                                                                       |                                                                                                            |                                                                                                                                                                                                  |           |
| 13 |         |                                                                                                                                                                                                                                                                                                                                                                       |                                                                                                            |                                                                                                                                                                                                  |           |
| 14 |         |                                                                                                                                                                                                                                                                                                                                                                       |                                                                                                            |                                                                                                                                                                                                  |           |
| 15 |         |                                                                                                                                                                                                                                                                                                                                                                       |                                                                                                            |                                                                                                                                                                                                  |           |
| 16 |         |                                                                                                                                                                                                                                                                                                                                                                       |                                                                                                            |                                                                                                                                                                                                  |           |
| 17 |         |                                                                                                                                                                                                                                                                                                                                                                       |                                                                                                            |                                                                                                                                                                                                  |           |
| 18 |         |                                                                                                                                                                                                                                                                                                                                                                       |                                                                                                            |                                                                                                                                                                                                  |           |
| 19 | Heisler | <b>Patient participants</b><br>244 patients (126 Intervention and 119 Control (NCM))<br>Age: 62.0<br>% male: 100%<br>HbA1c > 7.5%<br>Mean HbA1c 7.98<br>Mean BP: 138.4/ 76.5<br>% insulin baseline: 56%<br>Diabetes duration: NR<br><b>Practitioner and practice participants</b><br>Two VA facilities<br>Nurse and peer case managers                                | Reciprocal peer support                                                                                    | Patient-centred<br><br>Primary<br>HbA1c 6 months<br><br>Secondary: Medication adherence; Diabetes emotional distress; Diabetes specific social support; Medication changes Attendance at clinics | 6 months  |
| 20 | 2010    |                                                                                                                                                                                                                                                                                                                                                                       |                                                                                                            |                                                                                                                                                                                                  |           |
| 21 | USA     |                                                                                                                                                                                                                                                                                                                                                                       |                                                                                                            |                                                                                                                                                                                                  |           |
| 22 |         |                                                                                                                                                                                                                                                                                                                                                                       |                                                                                                            |                                                                                                                                                                                                  |           |
| 23 |         |                                                                                                                                                                                                                                                                                                                                                                       |                                                                                                            |                                                                                                                                                                                                  |           |
| 24 |         |                                                                                                                                                                                                                                                                                                                                                                       |                                                                                                            |                                                                                                                                                                                                  |           |
| 25 |         |                                                                                                                                                                                                                                                                                                                                                                       |                                                                                                            |                                                                                                                                                                                                  |           |
| 26 |         |                                                                                                                                                                                                                                                                                                                                                                       |                                                                                                            |                                                                                                                                                                                                  |           |
| 27 |         |                                                                                                                                                                                                                                                                                                                                                                       |                                                                                                            |                                                                                                                                                                                                  |           |
| 28 |         |                                                                                                                                                                                                                                                                                                                                                                       |                                                                                                            |                                                                                                                                                                                                  |           |
| 29 |         |                                                                                                                                                                                                                                                                                                                                                                       |                                                                                                            |                                                                                                                                                                                                  |           |
| 30 | Jacobs  | <b>Patient participants</b><br>396 patients (195 Intervention and 201 Control)<br>Age: 62.9<br>% male: 50%<br>HbA1c > 8.0%<br>Mean HbA1c 9.35<br>Mean BP: 138.7/ 78.9<br>% insulin baseline: NR<br>Mean diabetes duration: NR<br><b>Practitioner and practice participants</b><br>5 pharmacists, patients came from practices of 66 primary care physicians.          | A pharmacist assisted medication program intervention                                                      | Organisational<br><br>Primary<br>No specific primary outcome given or sample size:<br><br>Secondary: HbA1c < 7%; LDL Cholesterol < 100mg/dl; BP < 130/ 80mmHg                                    | 12 months |
| 31 | 2012    |                                                                                                                                                                                                                                                                                                                                                                       |                                                                                                            |                                                                                                                                                                                                  |           |
| 32 | USA     |                                                                                                                                                                                                                                                                                                                                                                       |                                                                                                            |                                                                                                                                                                                                  |           |
| 33 |         |                                                                                                                                                                                                                                                                                                                                                                       |                                                                                                            |                                                                                                                                                                                                  |           |
| 34 |         |                                                                                                                                                                                                                                                                                                                                                                       |                                                                                                            |                                                                                                                                                                                                  |           |
| 35 |         |                                                                                                                                                                                                                                                                                                                                                                       |                                                                                                            |                                                                                                                                                                                                  |           |
| 36 |         |                                                                                                                                                                                                                                                                                                                                                                       |                                                                                                            |                                                                                                                                                                                                  |           |
| 37 |         |                                                                                                                                                                                                                                                                                                                                                                       |                                                                                                            |                                                                                                                                                                                                  |           |
| 38 |         |                                                                                                                                                                                                                                                                                                                                                                       |                                                                                                            |                                                                                                                                                                                                  |           |
| 39 |         |                                                                                                                                                                                                                                                                                                                                                                       |                                                                                                            |                                                                                                                                                                                                  |           |
| 40 |         |                                                                                                                                                                                                                                                                                                                                                                       |                                                                                                            |                                                                                                                                                                                                  |           |
| 41 |         |                                                                                                                                                                                                                                                                                                                                                                       |                                                                                                            |                                                                                                                                                                                                  |           |
| 42 |         |                                                                                                                                                                                                                                                                                                                                                                       |                                                                                                            |                                                                                                                                                                                                  |           |
| 43 |         |                                                                                                                                                                                                                                                                                                                                                                       |                                                                                                            |                                                                                                                                                                                                  |           |
| 44 |         |                                                                                                                                                                                                                                                                                                                                                                       |                                                                                                            |                                                                                                                                                                                                  |           |
| 45 |         |                                                                                                                                                                                                                                                                                                                                                                       |                                                                                                            |                                                                                                                                                                                                  |           |
| 46 |         |                                                                                                                                                                                                                                                                                                                                                                       |                                                                                                            |                                                                                                                                                                                                  |           |
| 47 |         |                                                                                                                                                                                                                                                                                                                                                                       |                                                                                                            |                                                                                                                                                                                                  |           |
| 48 |         |                                                                                                                                                                                                                                                                                                                                                                       |                                                                                                            |                                                                                                                                                                                                  |           |
| 49 |         |                                                                                                                                                                                                                                                                                                                                                                       |                                                                                                            |                                                                                                                                                                                                  |           |

|                          |                                                                                                                                                                                                                                                                                                                                                                |                                                                |                 |                                                                                                                                                                                                                                                                                                                                                                                                   |                                                 |
|--------------------------|----------------------------------------------------------------------------------------------------------------------------------------------------------------------------------------------------------------------------------------------------------------------------------------------------------------------------------------------------------------|----------------------------------------------------------------|-----------------|---------------------------------------------------------------------------------------------------------------------------------------------------------------------------------------------------------------------------------------------------------------------------------------------------------------------------------------------------------------------------------------------------|-------------------------------------------------|
| Jameson<br>2010<br>USA   | <p><b>Patient participants</b><br/>104 patients (52 Intervention and 52 Control)<br/>Age: 49.6<br/>% male: 49%<br/>HbA1c <math>\geq</math> 9.0% (two of the population had T1DM)<br/>Mean HbA1c: 10.8%<br/>Mean BP: NR<br/>% insulin baseline: 49.6%<br/>Mean diabetes duration: NR</p> <p><b>Practitioner and practice participants</b><br/>1 pharmacist.</p> | A pharmacist collaborative management intervention             | Organisational  | <p>Primary:<br/>HbA1c</p> <p>Secondary: % of patients with a 1.0% decrease in HbA1c.</p>                                                                                                                                                                                                                                                                                                          | 12 months                                       |
| Jovanovic<br>2004<br>USA | <p><b>Patient participants</b><br/>362 patients (186 Intervention and 172 Control)<br/>Age: 57.0<br/>% male: 23.8%<br/>HbA1c &gt; 7.5<br/>Mean HbA1c: 9.65%<br/>Mean BP: 135/ 79<br/>% insulin baseline: NR<br/>Mean diabetes duration: 11.1</p> <p><b>Practitioner and practice participants</b><br/>Unclear number of case managers and practices</p>        | Diabetes case management by a nurse or dietician               | Organisational  | <p>Primary:<br/>HbA1c</p> <p>Secondary: % participants achieving HbA1c goals<br/>medication usage; BP ; Lipids; BMI; Frequency of hypoglycaemia</p>                                                                                                                                                                                                                                               | 36 months                                       |
| Keogh<br>2011<br>Ireland | <p><b>Patient participants</b><br/>121 patients (60 Intervention and 61 Control)<br/>Age: 58.6<br/>% male: 64%<br/>HbA1c <math>\geq</math> 8.0%<br/>Median HbA1c: 9.2<br/>Mean BP: 138.8/ 76.8<br/>% insulin baseline: 52%<br/>Mean diabetes duration: 9.4</p> <p><b>Practitioner and practice participants</b><br/>One practice<br/>One psychologist</p>      | Psychological family intervention                              | Organisational  | <p>Primary outcome:<br/>Hba1c</p> <p>Secondary outcomes: Illness perceptions (Brief illness Perception Questionnaire); Psychological wellbeing (12-item Well-Being questionnaire); BP; BMI; Diabetes self management (Summary of Diabetes Self-care Activities Questionnaire); Self Efficacy (UK version Diabetes Self-Efficacy Scale); Family support (Diabetes Family Behaviour Checklist).</p> | 6 months                                        |
| Kim<br>2009<br>USA       | <p><b>Patient participants</b><br/>83 patients (41 Intervention and 42 Control)<br/>Age: 56.4<br/>% male: 55.4%<br/>HbA1c <math>\geq</math> 7.5%</p>                                                                                                                                                                                                           | A Community-based, culturally tailored behavioral intervention | Patient-centred | <p>Primary:<br/>HbA1c</p> <p>Secondary: Diabetes knowledge test (DKT)' Self efficacy (Stanford Chronic Disease Self-Efficacy scale); Self care</p>                                                                                                                                                                                                                                                | 30 weeks (7 months)<br><br>6 month intervention |

|                                          |                                                                                                                                                                                                                                                                                                                                                                                                                                                                            |                                                                                              |                 |                                                                                                                                                                                                                   |           |
|------------------------------------------|----------------------------------------------------------------------------------------------------------------------------------------------------------------------------------------------------------------------------------------------------------------------------------------------------------------------------------------------------------------------------------------------------------------------------------------------------------------------------|----------------------------------------------------------------------------------------------|-----------------|-------------------------------------------------------------------------------------------------------------------------------------------------------------------------------------------------------------------|-----------|
|                                          | <p>Mean HbA1c: 9.25%</p> <p>Mean BP 132.1/ 79.3</p> <p>% insulin baseline: NR</p> <p>Mean diabetes duration: NR</p> <p><b>Practitioner and practice participants</b></p> <p>Uncertain number practices</p> <p>Community nurse delivered</p>                                                                                                                                                                                                                                |                                                                                              |                 | (Diabetes self care activitiis (SDSCA); Depression (Kim Depression Scale for Korean Americans); Quality of Life (Diabetes Quality of Life Measure (DQQL); Lipids; BP; BMI                                         |           |
| <p>Krein</p> <p>2004</p> <p>USA</p>      | <p><b>Patient participants</b></p> <p>246 patients (123 Intervention and 123 Control)</p> <p>Age: 61</p> <p>% male: 97%</p> <p>HbA1c <math>\geq</math>7.5%</p> <p>Mean HbA1c 9.25</p> <p>Mean BP: 145/ 86</p> <p>% insulin baseline: 59%</p> <p>Mean diabetes duration: 11</p> <p><b>Practitioner and practice participants</b></p> <p>One VA centre, unclear number of practices</p> <p>Two nurse case managers</p>                                                       | Case management by nurse practitioners                                                       | Organisational  | <p>Primary:</p> <p>HbA1c</p> <p>Secondary: LDL; Cholesterol; BP; Health status; Patient satisfaction; Inpatient and outpatient encounters, pharmacy and laboratory use; Semi structured interviews also done.</p> | 18 months |
| <p>Long</p> <p>2012</p> <p>USA</p>       | <p><b>Patient participants</b></p> <p>118 patients (38 Intervention 1 (PM), 40 Intervention 2 (FI) and 39 Control)</p> <p>Age: 60</p> <p>% male: 94%</p> <p>HbA1c &gt; 8.0% (two patients may have had T1DM)</p> <p>HbA1c Mean: 9.7</p> <p>Mean BP: NR</p> <p>% insulin baseline: 74%</p> <p>Mean diabetes duration: NR</p> <p>Diabetes over 10 years: 58%</p> <p><b>Practitioner and practice participants</b></p> <p>Unclear number of practices</p> <p>Peer mentors</p> | <p>Two interventions:</p> <p>Peer mentoring</p> <p>Financial incentivisation of patients</p> | Patient-centred | <p>Primary:</p> <p>Hba1c</p> <p>Secondary: Patient recollection of hypoglycaemic event</p>                                                                                                                        | 6 months  |
| <p>Maislos</p> <p>2002</p> <p>Israel</p> | <p><b>Patient participants</b></p> <p>82 patients (48 Intervention and 34 Control)</p> <p>Age: 60.5</p> <p>% male: 29.5%</p> <p>HbA1c <math>\geq</math> 10%</p> <p>Mean HbA1c 11.35</p> <p>Mean BP: NR</p>                                                                                                                                                                                                                                                                 | A mobile clinic providing interdisciplinary care                                             | Organisational  | <p>Primary:</p> <p>Decrease of HbA1c of 0.5% at six months</p> <p>Secondary: Compliance with study protocol at six months</p>                                                                                     | 6 months  |



|                                               |                                                                                                                                                                                                                                                                                                                                                     |                                                                                                                                                                                          |                |                                                                                                                                                                                                                                                                      |           |
|-----------------------------------------------|-----------------------------------------------------------------------------------------------------------------------------------------------------------------------------------------------------------------------------------------------------------------------------------------------------------------------------------------------------|------------------------------------------------------------------------------------------------------------------------------------------------------------------------------------------|----------------|----------------------------------------------------------------------------------------------------------------------------------------------------------------------------------------------------------------------------------------------------------------------|-----------|
|                                               | % insulin baseline: 20%<br>Duration diabetes: 10<br><b>Practitioner and practice participants</b><br>2 practices involved via 1 mobile clinic                                                                                                                                                                                                       |                                                                                                                                                                                          |                |                                                                                                                                                                                                                                                                      |           |
| Mathers<br>2012<br>UK<br>Cluster RCT          | <b>Patient participants</b><br>175 patients (95 Intervention and 80 Control)<br>Age: 64<br>% male: 54%<br>HbA1c $\geq$ 7.5<br>Mean HbA1c: 8.7%<br>Mean BP: NR<br>% insulin baseline: NR<br>Duration diabetes: 7.8<br><b>Practitioner and practice participants</b><br>49 practices involved<br>GPs and nurses from practices delivered intervention | Patient decision aid to improve decision quality and glycaemic control                                                                                                                   | Professional   | Primary:<br>HbA1c<br><br>Secondary: Decisional conflict scale score- indicator of decision quality; Knowledge and realistic expectations of the risks and benefits; Regret scale                                                                                     | 6 months  |
| McDermott<br>2015<br>Australia<br>Cluster RCT | <b>Patient participants</b><br>213 patients (113 Intervention and 100 Control)<br>Age: 47.9<br>% male: 37.6%<br>HbA1c $\geq$ 8.5 (69mmol/mol)<br>Mean HbA1c 10.7<br>Mean BP: 131/ 79.3<br>% insulin baseline: 44.4%<br>Diabetes duration: NR<br><b>Practitioner and practice participants</b><br>12 remote communities in north Queensland.         | Community-based health-worker led case management approach to the care of Indigenous adults with poorly controlled type 2 diabetes in primary care services in remote northern Australia | Organisational | Primary outcome:<br>HbA1c level at 18 months<br><br>Secondary outcomes:<br>BP<br>BMI<br>Lipids<br>Medications<br>ACR<br>eGFR<br>Test of Functional Health Literacy for Adults (TOFHLA)<br>Assessment of Quality of Life (AQoL) instrument<br>Implementation Fidelity | 18 months |
| McMahon<br>2005<br>USA                        | <b>Patient participants</b><br>104 patients (52 Intervention and 52 Control)<br>Age: 63.5<br>% male: 99%<br>HbA1c $\geq$ 9%<br>Mean HbA1c: 10.0%<br>Mean BP: 140/ 81<br>% insulin baseline: 54%<br>Duration diabetes: 12.3 years<br><b>Practitioner and practice participants</b><br>Practice number unclear                                        | Web-based care management                                                                                                                                                                | Organisational | Primary:<br>HbA1c<br><br>Secondary<br>Systolic BP<br>Diastolic BP<br>TAG<br>LDL Cholesterol<br>HDL Cholesterol                                                                                                                                                       | 12 months |

|                                        |                                                                                                                                                                                                                                                                                                                                                                                                                      |                                                                                                  |                 |                                                                                                                                                                                                                                              |                                             |
|----------------------------------------|----------------------------------------------------------------------------------------------------------------------------------------------------------------------------------------------------------------------------------------------------------------------------------------------------------------------------------------------------------------------------------------------------------------------|--------------------------------------------------------------------------------------------------|-----------------|----------------------------------------------------------------------------------------------------------------------------------------------------------------------------------------------------------------------------------------------|---------------------------------------------|
|                                        | Care manager available                                                                                                                                                                                                                                                                                                                                                                                               |                                                                                                  |                 |                                                                                                                                                                                                                                              |                                             |
| Mons<br>2013<br>Germany                | <p><b>Patient participants</b><br/>204 patients (103 Intervention and 101 Control)<br/>Age: 67.5<br/>% male: 61%<br/>HbA1c &gt; 7.5%<br/>Mean HbA1c: 8.1%<br/>Mean BP: 137.5/ 80<br/>% insulin baseline: NR<br/>Duration diabetes: NR</p> <p><b>Practitioner and practice participants</b><br/>10 GP practices<br/>Practice nurses</p>                                                                               | Supportive telephone counseling                                                                  | Patient-centred | <p>Primary<br/>HbA1c</p> <p>Secondary Systolic BP; Diastolic BP; Cholesterol; Health related quality of life (Short Form General Health Survey: SF-12); Symptoms of depression: Geriatric depression scale</p>                               | 18 months                                   |
| O'Connor<br>2014<br>USA<br>Cluster RCT | <p><b>Patient participants</b><br/>1102 patients (569 Intervention and 533 Control)<br/>Age: 43% ≥ 65 years. ~ 61 mean<br/>% male: 51.3%<br/>HbA1c ≥ 8%<br/>Mean HbA1c: 9.8%<br/>Mean BP: NR<br/>% insulin baseline: NR<br/>Diabetes duration: NR</p> <p><b>Practitioner and practice participants</b><br/>Large medical groups in California.<br/>Clusters defined on their linkage to primary care physicians.</p> | Telephone Outreach to Improve Medication Adherence and Metabolic Control in Adults With Diabetes | Organisational  | <p>Primary Outcome:<br/>Medication adherence (at least one prescription fill within 60 days of prescription date).</p> <p>Secondary Outcomes: Medication persistence (two or more prescription fills within 180 days); HbA1c; BP; Lipids</p> | 6 months                                    |
| Odegard<br>2005<br>USA                 | <p><b>Patient participants</b><br/>77 patients (43 Intervention and 34 Control)<br/>Age: 51.8<br/>% male: 57%<br/>HbA1c ≥ 9.0%<br/>Mean HbA1c: 10.4%<br/>Mean BP: NR<br/>% insulin baseline: 32%<br/>Duration diabetes: 7.6</p> <p><b>Practitioner and practice participants</b><br/>7 primary care clinics<br/>Pharmacists: Unclear number</p>                                                                      | A pharmacist intervention care management intervention                                           | Organisational  | <p>Primary<br/>HbA1c 12 months</p> <p>Secondary: Medication appropriateness (Medication Appropriate Index/ MAI); Self reported adherence by questionnaire</p>                                                                                | 6 month intervention but HbA1c at 12 months |

|                                                                                           |                                        |                                                                                                                                                                                                                                                                                                                                                                            |                                                                      |                 |                                                                                                                                                                                                                                  |                                                                                         |
|-------------------------------------------------------------------------------------------|----------------------------------------|----------------------------------------------------------------------------------------------------------------------------------------------------------------------------------------------------------------------------------------------------------------------------------------------------------------------------------------------------------------------------|----------------------------------------------------------------------|-----------------|----------------------------------------------------------------------------------------------------------------------------------------------------------------------------------------------------------------------------------|-----------------------------------------------------------------------------------------|
| 1<br>2<br>3<br>4<br>5<br>6<br>7<br>8<br>9<br>10<br>11<br>12<br>13<br>14<br>15<br>16<br>17 | Palmas<br>2014<br>USA                  | <p><b>Patient participants</b><br/>360 patients (181 Intervention and 179 Control)<br/>Age: 57.6<br/>% male: 38%<br/>HbA1c <math>\geq</math> 8.0%<br/>Mean HbA1c: 8.7%<br/>Mean BP: 136/ 81<br/>% insulin baseline: NR<br/>Duration diabetes: NR</p> <p><b>Practitioner and practice participants</b><br/>Unclear number GP practices<br/>Two community health workers</p> | Community health worker (CHW) intervention in an Hispanic population | Patient-centred | <p>Primary:<br/>HbA1c</p> <p>Secondary: Systolic BP; Diastolic BP; LDL Cholesterol; Medication adherence; Dosage and intensity; Physical activity; Diet; Depression</p>                                                          | 12 months                                                                               |
| 18<br>19<br>20<br>21<br>22<br>23<br>24<br>25<br>26<br>27                                  | Phillis-Tsimikas<br>2011<br>USA        | <p><b>Patient participants</b><br/>207 patients (104 Intervention and 103 Control)<br/>Age: 50.7<br/>% male: 29.5%<br/>HbA1c &gt; 8.0%<br/>Mean HbA1c: 10.4%<br/>Mean BP: 122.6/75<br/>Duration diabetes: NR<br/>% insulin baseline: NR</p> <p><b>Practitioner and practice participants</b><br/>Unclear number GP practices participating<br/>Peer educators</p>          | Peer-led diabetes education programs in high-risk Mexican Americans  | Patient-centred | <p>Primary:<br/>HbA1c</p> <p>Secondary: Lipids; BP; BMI; Self management behaviours and Depression (in separate publication)</p>                                                                                                 | 10 months<br><br>Intervention was 4 months and primary outcome was 6 months after this. |
| 28<br>29<br>30<br>31<br>32<br>33<br>34<br>35<br>36                                        | Polonsky<br>2011<br>USA<br>Cluster RCT | <p><b>Patient participants</b><br/>499 patients (256 Intervention and 227 Control)<br/>Age: 55.8<br/>% male: 53.2%<br/>HbA1c &gt; 7.5%<br/>Mean HbA1c: 8.9<br/>Mean BP: NR<br/>% on insulin: 0%<br/>Duration diabetes: 7.6</p> <p><b>Practitioner and practice participants</b><br/>34 GP practices participating</p>                                                      | Self blood glucose monitoring                                        | Patient-centred | <p>Primary:<br/>Hba1c</p> <p>Secondary: Treatment intensification; Total number of visits with medication or lifestyle modifications; Time to the first treatment change; Frequency of SMBG; GWB from WHO-5 Well-Being Index</p> | 12 months                                                                               |
| 37<br>38<br>39<br>40<br>41<br>42<br>43<br>44<br>45                                        | Quinn<br>2011                          | <p><b>Patient participants</b><br/>Cluster trial, 3 intervention groups, 1 control<br/>163 patients (Intervention 1 (CO) 23,</p>                                                                                                                                                                                                                                           | Mobile phone-based treatment/behavioural coaching intervention       | Patient-centred | <p>Primary:<br/>HbA1c</p>                                                                                                                                                                                                        | 12 months                                                                               |

1  
2  
3  
4  
5  
6  
7  
8  
9  
10  
11  
12  
13  
14  
15  
16  
17  
18  
19  
20  
21  
22  
23  
24  
25  
26  
27  
28  
29  
30  
31  
32  
33  
34  
35  
36  
37  
38  
39  
40  
41  
42  
43  
44  
45  
46  
47  
48  
49

|                            |                                                                                                                                                                                                                                                                                                                                                                            |                                                                                                                                                 |                 |                                                                                                                                                                                                                                                                                                                                                                                 |           |
|----------------------------|----------------------------------------------------------------------------------------------------------------------------------------------------------------------------------------------------------------------------------------------------------------------------------------------------------------------------------------------------------------------------|-------------------------------------------------------------------------------------------------------------------------------------------------|-----------------|---------------------------------------------------------------------------------------------------------------------------------------------------------------------------------------------------------------------------------------------------------------------------------------------------------------------------------------------------------------------------------|-----------|
| USA<br>Cluster RCT         | Intervention 2 (CPP) 22, Intervention 3 (CPDS) 62 and Control 56)<br>Age: 52.9 (weighted average)<br>% male: 52.5% (weighted average)<br>HbA1c $\geq$ 7.5%<br>Mean HbA1c: 9.4<br>Mean SBP: 131/ NR<br>% insulin baseline: NR<br>Duration diabetes: 8.2<br><b>Practitioner and practice participants</b><br>26 GP practices participating                                   |                                                                                                                                                 |                 | Secondary: PHQ-9 questionnaire for depressive symptoms; Self completion patient outcome instrument; Diabetes Distress Scale; BP; Lipids; Hypoglycaemic events; Hospitalisations and ED visits                                                                                                                                                                                   |           |
| Rothman<br>2005<br>USA     | <b>Patient participants</b><br>217 patients (112 Intervention and 105 Control)<br>Age: 55.5<br>% male: 44%<br>HbA1c $\geq$ 8.0%<br>Mean HbA1c: 11<br>Mean BP: 138.5/ 81<br>% insulin baseline: 39%<br>Duration diabetes: 8.5<br><b>Practitioner and practice participants</b><br>Three pharmacists                                                                         | A primary care-based disease management program delivered by trained pharmacists.                                                               | Organisational  | Primary:<br>HbA1c<br><br>Secondary: BP; Aspirin; Lipids; Diabetes knowledge Satisfaction (Diabetes Treatment Satisfaction Questionnaire); Use of clinical services; Adverse events; Process measures (time spent with patients and medication changes)                                                                                                                          | 12 months |
| Schillinger<br>2009<br>USA | <b>Patient participants</b><br>339 patients (112 intervention 1 (ATSM), 113 intervention 2 (GVC) and 114 Control)<br>Age: 56.1<br>% male: 41 %<br>HbA1c $\geq$ 8.0%<br>Mean HbA1c: 9.5%<br>Mean BP: 140/ 77.3<br>% insulin baseline: 38%<br>Duration diabetes: 9.5<br><b>Practitioner and practice participants</b><br>Uncertain number GPs- in a safety net health system | Two interventions:<br><br>Self-Management Support via 1/ Automated telephone self management support (ATSM) and 2/ Group medical visits (GMVs). | Patient-centred | Primary:<br>Self management behaviour<br><br>Secondary: Patient assessment of chronic illness care (PACIC); Diabetes Quality Improvement Program; Interpersonal Processes of Care for Diverse Populations (IPC) instrument; Self management behavior (Foods, diets, exercise, self monitoring); SF-12 instrument for QoL; Functional status- likert scale; HbA1c; SBP; DBP; BMI | 12 months |
| Sen<br>2014                | <b>Patient participants</b><br>75 patients (21 Intervention 1 (low), 26 Intervention 2 (high) and 28 Control)<br>Age: 54.3                                                                                                                                                                                                                                                 | Financial incentives for home based monitoring- two interventions                                                                               | Financial       | Primary:<br>Adherence over three months<br><br>Secondary: HbA1c                                                                                                                                                                                                                                                                                                                 | 12 weeks  |

|                         |                                                                                                                                                                                                                                                                                                                                                                                                                                                                            |                                                                 |                 |                                                                                                                                                                                                                                |           |
|-------------------------|----------------------------------------------------------------------------------------------------------------------------------------------------------------------------------------------------------------------------------------------------------------------------------------------------------------------------------------------------------------------------------------------------------------------------------------------------------------------------|-----------------------------------------------------------------|-----------------|--------------------------------------------------------------------------------------------------------------------------------------------------------------------------------------------------------------------------------|-----------|
| USA                     | <p>% male: 36%</p> <p>HbA1c <math>\geq</math> 7.5% (90-95% had T2DM from personal correspondence with author)</p> <p>Mean HbA1c 9.5%</p> <p>Mean BP: 132.9/ 86.1</p> <p>% insulin baseline: NR</p> <p>Mean diabetes duration: NR</p> <p><b>Practitioner and practice participants</b></p> <p>1 practice</p>                                                                                                                                                                |                                                                 |                 |                                                                                                                                                                                                                                |           |
| Sugiyama<br>2015<br>USA | <p><b>Patient participants</b></p> <p>516 patients (258 Intervention and 258 Control)</p> <p>Age: 63</p> <p>% male: 30%</p> <p>HbA1c <math>\geq</math> 8.0%</p> <p>Mean HbA1c: 9.7</p> <p>Mean BP: NR</p> <p>% insulin baseline: NR</p> <p>Diabetes duration: NR</p> <p><b>Practitioner and practice participants</b></p> <p>Participants were recruited from senior centers, churches, community clinics, and Los Angeles County Community and Senior Service Centers</p> | Diabetes self management education by trained health educators. | Patient-centred | <p>Primary:<br/>HbA1c</p> <p>Secondary: Change Mental Component Summary Score (MCS-12) from the SF-12; Social support score from the Diabetes Care Profile</p>                                                                 | 6 months  |
| Tang<br>2013<br>USA     | <p><b>Patient participants</b></p> <p>415 patients (203 Intervention and 213 Control)</p> <p>Age: 54</p> <p>% male: 60%</p> <p>HbA1c <math>\geq</math> 7.5%</p> <p>Mean HbA1c: 9.3</p> <p>Mean BP: 126.6/ 72.7</p> <p>% insulin baseline: NR</p> <p>Mean diabetes duration: NR</p> <p><b>Practitioner and practice participants</b></p> <p>Uncertain number practices</p>                                                                                                  | Online disease management of diabetes                           | Patient-centred | <p>Primary:<br/>HbA1c</p> <p>Secondary: SBP; DBP; LDL; 10 year Framingham risk; Satisfaction; Psychosocial wellbeing; Healthcare utilization</p>                                                                               | 12 months |
| Taylor<br>2003<br>USA   | <p><b>Patient participants</b></p> <p>169 patients (84 Intervention and 85 Control)</p> <p>Age: 55.2</p> <p>% male: 52.7%</p> <p>HbA1c <math>&gt;</math> 10.0%</p> <p>Mean HbA1c: 9.5%</p>                                                                                                                                                                                                                                                                                 | Nurse care management (NCM)                                     | Organisational  | <p>Primary:<br/>% of patients in 'target' HbA1c</p> <p>Secondary: Total cholesterol; HDL Cholesterol; LDL cholesterol; TAGs; Glucose; Microalbuminuria; SBP; DBP; Processes of care (foot, eye, dental exam and flu shot);</p> | 12 months |

1  
2  
3  
4  
5  
6  
7  
8  
9  
10  
11  
12  
13  
14  
15  
16  
17  
18  
19  
20  
21  
22  
23  
24  
25  
26  
27  
28  
29  
30  
31  
32  
33  
34  
35  
36  
37  
38  
39  
40  
41  
42  
43  
44  
45  
46  
47  
48  
49

|                             |                                                                                                                                                                                                                                                                                                                           |                      |                 |                                                                                                                                         |          |
|-----------------------------|---------------------------------------------------------------------------------------------------------------------------------------------------------------------------------------------------------------------------------------------------------------------------------------------------------------------------|----------------------|-----------------|-----------------------------------------------------------------------------------------------------------------------------------------|----------|
|                             | Mean BP: 127.5/ 72.8<br>% insulin baseline: NR<br>Mean diabetes duration NR<br><b>Practitioner and practice participants</b><br>Uncertain number practices<br>Nurse care managers                                                                                                                                         |                      |                 | Psychosocial (SF 26 for QoL and Duke Activity Status);<br>Patient and physician satisfaction; Medical utilization<br>(physician visits) |          |
| Thom<br><br>2013<br><br>USA | <b>Patient participants</b><br>299 patients (151 Intervention and 148 Control)<br>Age: 55.2<br>% male: 47.8%<br>HbA1c ≥ 8.0%<br>Mean HbA1c: 10.0<br>Mean BP: 143.2/ NR<br>% insulin baseline: 55%<br>Mean diabetes duration: 8.9<br><b>Practitioner and practice participants</b><br>6 practices included<br>Peer coaches | Peer health coaching | Patient-centred | Primary:<br>HbA1c<br><br>Secondary: % patients whose HbA1c dropped 1%; %<br>patients with a HbA1c less 7.5; LDL; SBP; BMI               | 6 months |

**Glossary of abbreviations:**

ACR (albumin-creatinine ratio), AQoL (assessment of quality of life), ATSM (automated telephone self management support) , BMI (body mass index), BP (blood pressure), CDSMP (chronic disease self-management program) , CO (coach-only), CPDS (coach primary care provider portal with decision support), CPP (coach primary care physician portal), CSQ8 (client satisfaction scale 8), DBP (diastolic blood pressure), DMSES (diabetes management self efficacy scale) , DQOL (diabetes quality of life measure), ED (emergency department), eGFR (estimated glomerular filtration rate), FI (financial incentivisation), GMV (group medical visits), GWB (global well being), LDL (low density lipoprotein), MAI (medication appropriate index), MARS (medication adherence rating scale), MCS-12 (mental component summary score), NR (not recorded), PACIC (Patient assessment of chronic illness care), PAID (problems areas in diabetes scale), PDA (personal digital assistant), PHQ-9 (patient health questionnaire 9), PM (peer mentoring), SBP (systolic blood pressure), SDSCA (summary of diabetes self-care behaviours scale), SF-12 (short Form general health survey), T2DM (type 2 diabetes mellitus), TOFHLA (test of functional health literacy for adults), VA (veteran’s affairs), WHO (World Health Organisation).

1  
2  
3  
4  
5  
6  
7  
8  
9  
10  
11  
12  
13  
14  
15  
16  
17  
18  
19  
20  
21  
22  
23  
24  
25  
26  
27  
28  
29  
30  
31  
32  
33  
34  
35  
36  
37  
38  
39  
40  
41  
42  
43  
44  
45  
46  
47  
48  
49

For peer review only

**Appendix 1: Search String****Pubmed/ Medline**

Diabetes OR T2D\$ OR NIDDM OR MODY OR Non-insulin dependent OR Insulin OR  
IDDM OR Poorly-controlled

AND

Lipid OR cholesterol OR blood pressure OR hypertension OR cardiovascular risk OR  
glycaemic OR glycemic OR HbA1c OR A1c OR (HbA AND (1c)) OR haemoglobin OR  
hemoglobin

AND

primary care or primary health or family physician\* or general practi\* or family  
practi\* or outpatient? or clinic? or ambulatory or health centre? or health centre? or  
office or veterans OR pharmacist OR nurse OR doctor OR psychologist OR OR health  
care provider OR case manager OR “case management” OR “care management”

((primary care[Title/Abstract] OR primary health[Title/Abstract] OR (family  
physician[Title/Abstract] OR family physicians[Title/Abstract]) OR (general  
practicability[Title/Abstract] OR general practice[Title/Abstract] OR general  
practice,[Title/Abstract] OR general practices[Title/Abstract] OR general  
practician[Title/Abstract] OR general practitioners[Title/Abstract] OR general  
practitioner[Title/Abstract] OR general practitioners[Title/Abstract] OR general  
practitioner[Title/Abstract] OR general practitioners[Title/Abstract] OR general  
practiioners[Title/Abstract] OR general practioner[Title/Abstract] OR general  
practioners[Title/Abstract] OR general practionner[Title/Abstract] OR general  
practionners[Title/Abstract] OR general practise[Title/Abstract] OR general  
practises[Title/Abstract] OR general practitioner[Title/Abstract] OR general



1  
2  
3 practitioner's[Title/Abstract] OR general practitioners[Title/Abstract] OR general  
4  
5 practitioner[Title/Abstract] OR general practitionners[Title/Abstract] OR general  
6  
7 practive[Title/Abstract]) OR (family practice[Title/Abstract] OR family  
8  
9 practices[Title/Abstract] OR family practioner[Title/Abstract] OR family  
10  
11 practise[Title/Abstract] OR family practitioner[Title/Abstract] OR family  
12  
13 practitioners[Title/Abstract]) OR outpatient?[Title/Abstract] OR  
14  
15 clinic?[Title/Abstract] OR ambulatory[Title/Abstract] OR health  
16  
17 centre?[Title/Abstract] OR health centre?[Title/Abstract] OR office[Title/Abstract]  
18  
19 OR veterans[Title/Abstract] OR pharmacist[Title/Abstract] OR nurse[Title/Abstract]  
20  
21 OR doctor[Title/Abstract] OR psychologist[Title/Abstract] OR health care  
22  
23 provider[Title/Abstract] OR case manager[Title/Abstract] OR "case  
24  
25 management"[Title/Abstract] OR "care management"[Title/Abstract]) AND  
26  
27 ("1990/01/01"[PDAT] : "2014/11/26"[PDAT])) AND ((Lipid[Title/Abstract] OR  
28  
29 cholesterol[Title/Abstract] OR blood pressure[Title/Abstract] OR  
30  
31 hypertension[Title/Abstract] OR cardiovascular risk[Title/Abstract] OR  
32  
33 glycaemic[Title/Abstract] OR glycemic[Title/Abstract] OR HbA1c[Title/Abstract] OR  
34  
35 A1c[Title/Abstract] OR (HbA[Title/Abstract] AND 1c[All Fields]) AND Title/Abstract[All  
36  
37 Fields] OR haemoglobin[Title/Abstract] OR hemoglobin[Title/Abstract]) AND  
38  
39 ("1990/01/01"[PDAT] : "2014/11/26"[PDAT])) AND ((Diabetes[Title/Abstract] OR  
40  
41 T2D\$[Title/Abstract] OR NIDDM[Title/Abstract] OR MODY[Title/Abstract] OR Non-  
42  
43 insulin dependent[Title/Abstract] OR Insulin[Title/Abstract] OR IDDM[Title/Abstract]  
44  
45 OR Poorly-controlled[Title/Abstract]) AND ("1990/01/01"[PDAT] :  
46  
47 "2015/12/31"[PDAT])) AND ("1990/01/01"[PDAT] : "2015/12/31"[PDAT])  
48  
49  
50  
51  
52  
53  
54  
55  
56  
57  
58  
59  
60

**WoS search**

TS = (Diabetes OR T2D\$ OR NIDDM OR MODY OR Non-insulin dependent OR Insulin OR IDDM OR Poorly-controlled )

AND

TS = (Lipid OR cholesterol OR blood pressure OR hypertension OR cardiovascular risk OR glycaemic OR glycemic OR HbA1c OR A1c OR (HbA AND (1c)) OR haemoglobin OR hemoglobin)

AND

TS = (primary care or primary health or family physician\* or general practi\* or family practi\* or outpatient? or clinic? or ambulatory or health centre? or health centre? or office)

TI = (Diabetes OR T2D\$ OR NIDDM OR MODY OR Non-insulin dependent OR Insulin OR IDDM OR Poorly-controlled ) AND TS = (Lipid OR cholesterol OR blood pressure OR hypertension OR cardiovascular risk OR glycaemic OR glycemic OR HbA1c OR A1c OR (HbA AND (1c)) OR haemoglobin OR hemoglobin) AND TS = (primary care or primary health or family physician\* or general practi\* or family practi\* or outpatient? or clinic? or ambulatory or health centre? or health centre? or office)

*Indexes=SCI-EXPANDED, SSCI, CPCI-S, CPCI-SSH Timespan=1990-2015*

**SCOPUS**

lipid OR cholesterol OR blood pressure OR hypertension OR cardiovascular risk

OR glycaemic OR glyceic OR hba1c OR a1c OR ( hba AND ( 1c ) ) OR haemogl  
obin OR hemoglobin AND diabetes OR t2d\$ OR niddm OR mody OR non-  
insulin dependent OR insulin OR iddm OR poorly-  
controlled AND primary care OR primary health OR family physician\* OR gener  
al practi\* OR family practi\* OR outpatient? OR clinic? OR ambulatory OR healt  
h centre? OR health centre? OR office AND ( EXCLUDE ( SUBJAREA , "DENT" ) O  
R EXCLUDE ( SUBJAREA , "ENVI" ) OR EXCLUDE ( SUBJAREA , "DENT" ) OR EXCLUD  
E ( SUBJAREA , "ENVI" ) OR EXCLUDE ( SUBJAREA , "ARTS" ) OR EXCLUDE ( SUBJAR  
EA , "CHEM" ) OR EXCLUDE ( SUBJAREA , "ENGI" ) OR EXCLUDE ( SUBJAREA , "BUS  
I" ) OR EXCLUDE ( SUBJAREA , "ECON" ) OR EXCLUDE ( SUBJAREA , "VETE" ) OR E  
XCLUDE ( SUBJAREA , "MATE" ) OR EXCLUDE ( SUBJAREA , "COMP" ) OR EXCLUDE  
( SUBJAREA , "MATH" ) OR EXCLUDE ( SUBJAREA , "EART" ) OR EXCLUDE ( SUBJAR  
EA , "PHYS" ) )

1990- 2015 Title abstract

**Embase**

(primary care OR primary health OR family physician\* OR general practi\* OR family  
practi\* OR outpatient? OR clinic? OR ambulatory OR health centre? OR health  
centre? OR office OR veterans OR pharmacist OR nurse OR doctor OR psychologist  
OR OR health care provider OR case manager OR case management OR care  
management):ab,ti

AND

(Lipid OR cholesterol OR blood pressure OR hypertension OR cardiovascular risk OR  
glycaemic OR glycemic OR HbA1c OR A1c OR (HbA AND (1c)) OR haemoglobin OR  
haemoglobin):ab,ti

AND

(Diabetes OR T2D\$ OR NIDDM OR MODY OR Non-insulin dependent OR Insulin OR  
IDDM OR Poorly-controlled):ab,ti

1  
2  
3 **Cochrane Library = 74**  
4  
5  
6  
7

8 (Diabetes OR T2D\$ OR NIDDM OR MODY OR Non-insulin dependent OR Insulin OR  
9 IDDM OR Poorly-controlled)  
10

11  
12  
13  
14 AND

15  
16  
17 (Lipid OR cholesterol OR blood pressure OR hypertension OR cardiovascular risk OR  
18 glycaemic OR glycemic OR HbA1c OR A1c OR (HbA AND (1c)) OR haemoglobin OR  
19 hemoglobin)  
20  
21

22  
23  
24  
25  
26 AND

27  
28  
29 (primary care or primary health or family physician\* or general practi\* or family  
30 practi\* or outpatient? or clinic? or ambulatory or health centre? or health centre?  
31 office or veterans OR pharmacist OR nurse OR doctor OR psychologist OR health care  
32 provider OR case manager OR case management OR care management)  
33  
34  
35

36  
37  
38  
39  
40 (Diabetes OR T2D\$ OR NIDDM OR MODY OR Non-insulin dependent OR Insulin OR  
41 IDDM OR Poorly-controlled) AND ( Lipid OR cholesterol OR blood pressure OR  
42 hypertension OR cardiovascular risk OR glycaemic OR glycemic OR HbA1c OR A1c OR  
43 (HbA AND (1c)) OR haemoglobin) AND (primary care or primary health or family  
44 physician\* or general practi\* or family practi\* or outpatient? or clinic? or  
45 ambulatory or health centre? or health centre? or office or veterans OR pharmacist  
46 OR nurse OR doctor OR psychologist OR health care provider OR case manager OR  
47 case management OR care management) in Title, Abstract, Keywords in Cochrane  
48  
49  
50  
51  
52  
53  
54  
55  
56  
57  
58  
59  
60  
Reviews

## Appendix 2

| <b>Appendix 2: Cochrane Effective Practice And Organisation of Care Review Group taxonomy of interventions:</b> |                                                                                                                                                                                                                                                                                       |
|-----------------------------------------------------------------------------------------------------------------|---------------------------------------------------------------------------------------------------------------------------------------------------------------------------------------------------------------------------------------------------------------------------------------|
| <b>Professional interventions</b>                                                                               | For example; distribution of educational materials to healthcare professional, or educational meetings, or audit and feedback.                                                                                                                                                        |
| <b>Organisational interventions</b>                                                                             | For example; Revision of professional role (e.g. community pharmacist providing case management for patient with diabetes) or skill mix changes (changes in numbers, types or qualifications of staff). Included telemedicine interventions with predominant organisational elements. |
| <b>Patient-orientated interventions</b>                                                                         | For example; patient education, peer support or support for self management. Including telephone and telemedicine interventions with predominant patients elements (with focus on self-management)                                                                                    |
| <b>Financial interventions</b>                                                                                  | For example; Fee-for-service for provider or a penalty for the patient.                                                                                                                                                                                                               |
| <b>Regulatory interventions</b>                                                                                 | For example; changes to local or national regulations designed to alter care delivery to improve outcomes.                                                                                                                                                                            |

## Appendix 3: Detailed description of study interventions

| N  | Study                                                | Brief intervention description                                                  | Intervention description                                                                                                                                                                                                                                                                                                                                                                                                                                                                                                                                                                                                                                                                                                                                         |
|----|------------------------------------------------------|---------------------------------------------------------------------------------|------------------------------------------------------------------------------------------------------------------------------------------------------------------------------------------------------------------------------------------------------------------------------------------------------------------------------------------------------------------------------------------------------------------------------------------------------------------------------------------------------------------------------------------------------------------------------------------------------------------------------------------------------------------------------------------------------------------------------------------------------------------|
| N. | Author<br>Year<br>Country                            | Brief Intervention description                                                  | Intervention description (detailed)<br><br>Length intervention<br><br>Predominant Intervention type<br><br>Comparison                                                                                                                                                                                                                                                                                                                                                                                                                                                                                                                                                                                                                                            |
| 1  | Blackberry<br><br>2013<br><br>Victoria,<br>Australia | Telephone coaching by nurses to support diabetes management and self monitoring | <p>The PEACH study:</p> <p>GP based nurse led telephone coaching; dealing with lifestyle issues, medication adherence and dosing, self monitoring of their disease, how to take greater initiative in the therapeutic alliance with their doctor, facilitating appropriate intensification of medications to achieve treatment goals. Nurses did not have prescribing rights.</p> <p>Length: In the first six months there were five telephone-coaching sessions at intervals of six weeks in the first six months, a coaching session at 8 and 10 months, a face-to-face coaching session at 12 months and a final coaching session at 15 months.</p> <p>Predominant EPOC intervention type: Patient-centred</p> <p>Comparison: Usual general practice care</p> |
| 2  | Capozza<br><br>2015<br><br>USA                       | Text-message based behavioural intervention for T2DM                            | <p>Receipt of 1-7 test diabetes-related messages per day, depending on the choices they made at enrolment. The content of the text messages were reviewed by certified diabetes educators and patients had control over the types and frequency of the messages. Users could turn off the program by texting the word 'stop'. The core messages related to diabetes education and health improvement (medication reminders, glucose testing reminders, BP measurement reminders and encouraging weight loss). Patients could reply to messages to get feedback.</p> <p>Length: 6 months of text messages</p>                                                                                                                                                     |

|   |                                              |                                                                                                                     |                                                                                                                                                                                                                                                                                                                                                                                                                                                                                                                                                                                                                                                                                                                                                                                                                                                                                                                                                                                                                                                                                                                                                                                                                                                                                                                                                                                                                                                                                                                                                                                                                                                                                              |
|---|----------------------------------------------|---------------------------------------------------------------------------------------------------------------------|----------------------------------------------------------------------------------------------------------------------------------------------------------------------------------------------------------------------------------------------------------------------------------------------------------------------------------------------------------------------------------------------------------------------------------------------------------------------------------------------------------------------------------------------------------------------------------------------------------------------------------------------------------------------------------------------------------------------------------------------------------------------------------------------------------------------------------------------------------------------------------------------------------------------------------------------------------------------------------------------------------------------------------------------------------------------------------------------------------------------------------------------------------------------------------------------------------------------------------------------------------------------------------------------------------------------------------------------------------------------------------------------------------------------------------------------------------------------------------------------------------------------------------------------------------------------------------------------------------------------------------------------------------------------------------------------|
|   |                                              |                                                                                                                     | <p>Predominant EPOC intervention type: Patient</p> <p>Comparison: Usual care</p>                                                                                                                                                                                                                                                                                                                                                                                                                                                                                                                                                                                                                                                                                                                                                                                                                                                                                                                                                                                                                                                                                                                                                                                                                                                                                                                                                                                                                                                                                                                                                                                                             |
| 3 | <p>Choe</p> <p>2005</p> <p>Michigan, USA</p> | <p>Pharmacist case management</p>                                                                                   | <p>The case manager was a clinical pharmacist who was already established as a pharmacotherapy consultant at the clinic before the start of the intervention. The clinical pharmacist evaluated patient's therapeutic regimens based on efficacy, safety, adverse effects, drug interactions, drug costs and monitoring. All therapeutic recommendations were discussed with the primary care provider before significant therapy alterations. The pharmacist also followed up on these recommendations. Face to face consultations between pharmacist and physician were included.</p> <p>Length: Initial one-hour consultation with patient and monthly telephone contact thereafter and saw patients in conjunction with their routine primary care visits for one year.</p> <p>Predominant EPOC intervention type: Organisational.</p> <p>Comparison: Usual care.</p>                                                                                                                                                                                                                                                                                                                                                                                                                                                                                                                                                                                                                                                                                                                                                                                                                    |
| 4 | <p>Crowley</p> <p>2015</p> <p>USA</p>        | <p>Intensive telemedicine intervention for veterans</p>                                                             | <p>An advanced comprehensive diabetes care (ACDC) program, including telemonitoring, physician guided medication management, self-management behavioural support and physician guided depression management. It was delivered via a telephone using existing staff in the VA.</p> <p>VA home technology (HT) nurses delivered the intervention. Usual care involves HT nurses ringing patients, but they do not deliver a comprehensive diabetes management intervention like ACDC. In terms of telemonitoring, patients were asked and prompted to perform SMBG daily and to submit this on their HT-issued equipment. They were called by a HT nurse if they did not submit data for three days. In terms of self-management every two weeks a HT nurse rang the patient, delivering a diabetes self-management support module. This was a 30-minute telephone call every 2 weeks- reviewing blood glucose data, reconciling medications and reviewed adherence. For the physician medication management component, the HT nurse then contacted the study physician (an endocrinologist) and medication changes (such as insulin changes) were transmitted back to the HT nurse via an EHR- the nurse then relaying this on to the patients. In terms of depression, if the baseline or three-month PHQ9 was high, a psychiatrist of primary care physician input was made.</p> <p>Length: Daily telemonitoring, two weekly calls by a home technology nurse, input by endocrinology to nursing staff at two weekly intervals over six months.</p> <p>Predominant EPOC intervention type: Organisational</p> <p>Comparison: Usual care but received an educational packet in addition.</p> |
| 5 | <p>Dale</p> <p>2009</p> <p>England</p>       | <p>Two intervention telecare groups:</p> <p>a) Peer-support telecare intervention</p> <p>b) Diabetic specialist</p> | <p>Two intervention telecare (telephone) groups:</p> <p>a) Telephone peer-delivered intervention.</p> <p>b) Diabetic specialist nurse telecare support</p> <p>The telecare support was intended to supplement routine care by motivating adherence to the advice provided by the GP or practice nurse at the time of change (medication and/ or lifestyle) in diabetes care.</p>                                                                                                                                                                                                                                                                                                                                                                                                                                                                                                                                                                                                                                                                                                                                                                                                                                                                                                                                                                                                                                                                                                                                                                                                                                                                                                             |



1  
2  
3  
4  
5  
6  
7  
8  
9  
10  
11  
12  
13  
14  
15  
16  
17  
18  
19  
20  
21  
22  
23  
24  
25  
26  
27  
28  
29  
30  
31  
32  
33  
34  
35  
36  
37  
38  
39  
40  
41  
42  
43  
44  
45  
46  
47  
48  
49

|   |                                                                            |                                                                                                                                          |                                                                                                                                                                                                                                                                                                                                                                                                                                                                                                                                                                                                                                                                                                                                                                                                                                                                                                                                                                                                                                                                                                                                                                                                                                                                                                                                                                                                                             |
|---|----------------------------------------------------------------------------|------------------------------------------------------------------------------------------------------------------------------------------|-----------------------------------------------------------------------------------------------------------------------------------------------------------------------------------------------------------------------------------------------------------------------------------------------------------------------------------------------------------------------------------------------------------------------------------------------------------------------------------------------------------------------------------------------------------------------------------------------------------------------------------------------------------------------------------------------------------------------------------------------------------------------------------------------------------------------------------------------------------------------------------------------------------------------------------------------------------------------------------------------------------------------------------------------------------------------------------------------------------------------------------------------------------------------------------------------------------------------------------------------------------------------------------------------------------------------------------------------------------------------------------------------------------------------------|
|   |                                                                            | nurse telecare support                                                                                                                   | <p>Length of intervention: The first telecare call was made 3-5 days later and a standard package offered support 7-10, 14-18 28-35, 56-70, 56-120 days later.</p> <p>Training for the telecare support was with a two days training programme (motivational interviewing, active listening skills).</p> <p>Peer supporters recruited through a diabetes care user group. Otherwise they were trained as above. Two were excluded from the trial as they could not master the techniques.</p> <p>The trained peer supporters had a median diabetes duration of 10 years and 6/9 had T2DM.</p> <p>They were paid a small fee and had access to an experienced DSN educationalist. They were invited to 6 monthly review meetings.</p> <p>Predominant EPOC intervention type: Patient-centred.</p> <p>Comparison: Usual care.</p>                                                                                                                                                                                                                                                                                                                                                                                                                                                                                                                                                                                             |
| 6 | DePue<br>2013<br><br>U.S. Territory of America<br>Somoa<br><br>Cluster RCT | Nurse–Community Health Worker Team in American Somoa                                                                                     | <p>Nurse–Community Health Worker Team: Nurse case manager (NCM) and four community health workers with a minimum of high school education- all staff underwent training. A field director supervised the research.</p> <p>Length: The NCM met with all patients at least once over 12 months, conducting groups sessions with patients at high risk, providing feedback to physicians and oversight of CHW visits. The CHWs helped patients make and keep healthcare appointments, helped patients understand diabetes, reinforced adherence to medications and provided support. Patients at higher risk were seen weekly in a group meeting conducted by the NCM with CHW assistance or, if unable to attend the group meeting, they were seen individually by CHWs.</p> <p>Patients at moderate risk were seen monthly by CHWs and patients at lower risk were seen every 3 months. All individual visits occurred at the patient’s home, workplace, or at TC, per the patient’s choice. Family members were encouraged to attend these visits. BG and BP were monitored at each visit and urgent levels were referred immediately to the TC physician during clinic hours or to the hospital emergency department.</p> <p>Predominant EPOC intervention type: Organisational.</p> <p>Comparison: Usual care. Patients also received a self-care diabetes book and a risk profile was placed in their medical chart.</p> |
| 7 | Edelman<br>2010<br><br>North Carolina and Virginia, USA.                   | Enrollment into a general medical clinic (GMC) with an internist, pharmacist and a nurse or educator that met seven times over 12 months | <p>Patients in the intervention arm were assigned to a group medical clinic (GMC) that met on the patient’s preferred half-day. Each group had 7-8 patients and a care team (a primary care internist, a pharmacist, a nurse or certified diabetes educator).</p> <p>The groups met every 2 months (7 visits over 12 months).</p> <p>Patients were given \$10 for each GMC session they attended. The care team met the group at each visit and each group met the same care team at each visit. Each provider could be a member of more than one care team.</p> <p>Each GMC session lasted 90-120 minutes visit: BP and home glucose values were checked at each GMC session; education assessment was then delivered by nurse or educator- the patients chose certain topics so the education sessions were tailored to the member’s needs. The pharmacist and PCP reviewed the</p>                                                                                                                                                                                                                                                                                                                                                                                                                                                                                                                                       |

|    |                        |                                                                    |                                                                                                                                                                                                                                                                                                                                                                                                                                                                                                                                                                                                                                                                                                                                                                                                                                                                                                                                                                                                                                                                                                                                                                                                                                                                                                                                                                                                                                                                                                                                                                                                                                                                                                                                                                                                                                                                         |
|----|------------------------|--------------------------------------------------------------------|-------------------------------------------------------------------------------------------------------------------------------------------------------------------------------------------------------------------------------------------------------------------------------------------------------------------------------------------------------------------------------------------------------------------------------------------------------------------------------------------------------------------------------------------------------------------------------------------------------------------------------------------------------------------------------------------------------------------------------------------------------------------------------------------------------------------------------------------------------------------------------------------------------------------------------------------------------------------------------------------------------------------------------------------------------------------------------------------------------------------------------------------------------------------------------------------------------------------------------------------------------------------------------------------------------------------------------------------------------------------------------------------------------------------------------------------------------------------------------------------------------------------------------------------------------------------------------------------------------------------------------------------------------------------------------------------------------------------------------------------------------------------------------------------------------------------------------------------------------------------------|
|    |                        |                                                                    | <p>medical record, BP and glucose levels at each session and an individualized management plan directed at improving HbA1c and BP was formulated (medications and lifestyle based). The Primary Care Provider was then informed.</p> <p>Signed attendance contacts to boost attendance, telephone contact if needed to change management based upon lab results.</p> <p>All patients received usual primary care on top of this.</p> <p>Predominant EPOC intervention type: Organisational.</p> <p>Comparison: Usual care.</p>                                                                                                                                                                                                                                                                                                                                                                                                                                                                                                                                                                                                                                                                                                                                                                                                                                                                                                                                                                                                                                                                                                                                                                                                                                                                                                                                          |
| 8* | Edelman<br>2015<br>USA | Nurse case management                                              | <p>A single nurse with experience in case management delivered both the tailored behavioral intervention and the control.</p> <p>For the intervention arm, the content was tailored to each patient's individual barriers to controlling blood sugar or BP. This content was divided into a series of topical modules addressing one or more behaviors appropriate for improving control of BP or blood sugar, and included physical activity, weight reduction, low salt intake, smoking cessation, medication adherence, management of hypoglycemia, and blood glucose monitoring. The modules assessed barriers to specific behaviors, and the nurse then tried to engage the patient in problem-solving in order to determine actions for overcoming these barriers. In addition, barriers that might generalize to a number of problems—specifically, low levels of disease knowledge, poor memory, poor social support, and concern about the quality of physician-patient decision-making—were addressed on their own. Fidelity was assessed by two nurse-investigators (KP, BG), who listened to a sample of 5 % of total calls for delivery of intended content.</p> <p>Length: The nurse rang intervention and control patients 12 times in total over 24 months every 2 months.</p> <p>Predominant EPOC intervention type: Organisational</p> <p>Comparison: "Attention Control". The control patients received calls that were not tailored; these calls provided traditional didactic information on a range of topics that had no relationship to HTN, DM, or any of the behaviors we were trying to improve (e.g., flu shots, skin cancer prevention). Content was tightly scripted, designed to limit the potential for productive interaction between nurse and patient, and was informed by standard guidelines as stated on government websites.</p> |
| 9  | Farmer<br>2012<br>UK   | Nurse-led, multilevel intervention to support medication adherence | <p>Nurse-led, consultation-based intervention to support patients with adherence to taking glucose lowering medications.</p> <p>This was a multi-level intervention, targeting both health professional and patient behaviour. Initially there was training for the clinic nurses provided by a clinical psychologist and an intervention facilitator' as the first part of the intervention. The aim was to strengthen patient motivation to take OGLM regularly and support medicine taking through action-plans.</p> <p>8 weeks after recruitment, patients were invited to the intervention visit to record and review their medication; and then randomised to either an intervention to support medication or adherence, or to standard care.</p>                                                                                                                                                                                                                                                                                                                                                                                                                                                                                                                                                                                                                                                                                                                                                                                                                                                                                                                                                                                                                                                                                                                 |

1  
2  
3  
4  
5  
6  
7  
8  
9  
10  
11  
12  
13  
14  
15  
16  
17  
18  
19  
20  
21  
22  
23  
24  
25  
26  
27  
28  
29  
30  
31  
32  
33  
34  
35  
36  
37  
38  
39  
40  
41  
42  
43  
44  
45  
46  
47  
48  
49

|    |                         |                                                                                                                                                                                                                                                           |                                                                                                                                                                                                                                                                                                                                                                                                                                                                                                                                                                                                                                                                                                                                                                                                                                                                                                                                                                                                                                                                                                                                                                                                                                                                                                                                                                                                                                                                                                                                                                                                                                                                                                                                                                                                                                                                                                                                            |
|----|-------------------------|-----------------------------------------------------------------------------------------------------------------------------------------------------------------------------------------------------------------------------------------------------------|--------------------------------------------------------------------------------------------------------------------------------------------------------------------------------------------------------------------------------------------------------------------------------------------------------------------------------------------------------------------------------------------------------------------------------------------------------------------------------------------------------------------------------------------------------------------------------------------------------------------------------------------------------------------------------------------------------------------------------------------------------------------------------------------------------------------------------------------------------------------------------------------------------------------------------------------------------------------------------------------------------------------------------------------------------------------------------------------------------------------------------------------------------------------------------------------------------------------------------------------------------------------------------------------------------------------------------------------------------------------------------------------------------------------------------------------------------------------------------------------------------------------------------------------------------------------------------------------------------------------------------------------------------------------------------------------------------------------------------------------------------------------------------------------------------------------------------------------------------------------------------------------------------------------------------------------|
|    |                         |                                                                                                                                                                                                                                                           | <p>There were 2 components in the intervention delivered to patients. (1) nurses elicited patient beliefs about intention to take their medications as prescribed. Positive beliefs were reinforced verbally and non-verbally, through provision of tailored information. Negative beliefs were addressed using problem solving and the nurse facilitated patients in action planning.</p> <p>The intervention consultation took 30 minutes, with 20 minutes for data collection, which both intervention and control patients received.</p> <p>Predominant EPOC intervention type: Organisational.</p> <p>Comparison: Usual care. The standard care visit lasted approximately 20 minutes, during which data were collected. Same nurses delivered this.</p>                                                                                                                                                                                                                                                                                                                                                                                                                                                                                                                                                                                                                                                                                                                                                                                                                                                                                                                                                                                                                                                                                                                                                                              |
| 10 | Forjough<br>2014<br>USA | <p>Three intervention groups, reflecting the individual and combined effects of a behavioural and technology intervention; a chronic Disease Self-Management Program (CDSMP) and a diabetes self-care software on a personal digital assistant (PDA).</p> | <p>Four arms in the trial:</p> <ul style="list-style-type: none"> <li>a) Chronic Disease Self Management Program (CDSMP)</li> <li>b) Personal digital assistant (PDA)</li> <li>c) Both CDSMP and PDA</li> <li>d) Usual care</li> </ul> <p>CDSMP: Involved a 6-week, classroom-based program for diabetes self-management. Based upon 1999 paper showing effectiveness of CDSMP. Its goal was to increase self-efficacy to decrease chronic disease related symptoms and avoidable healthcare utilization. It teaches participants techniques to facilitate enhanced decision making, action planning, and effective communication. CDSMP workshops hosted in clinical environments and community-based settings. Fidelity to classes not monitored. Master trainers/ lay leaders underwent 4 days of training- and the lay leaders used pre-scripted materials.</p> <p>PDA: This intervention arm were taught how to use a diabetes self-care software. It was loaded onto a handheld device and was called "Diabetes Pilot". The Diabetes Pilot allowed recording and some monitoring of blood glucose, BP, medication usage, physical activity and dietary intake on the PDA. One-to one instruction by a project coordinator covering key areas such as data entry, foot database utilization and reports was provided. Participants were instructed to input information daily. Training effectiveness was not assessed.</p> <p>CDSMP and PDA group received both.<br/>The CDSMP was a 6 week program, based in a classroom. Unclear how many workshops.<br/>The PDA arm: Uncertain, participants asked to use it daily and input information into it.<br/>Primary outcome 12 months, followed up to 24 months</p> <p>CDSMP: 6 weeks<br/>PDA: Uncertain, possibly 2 years</p> <p>Predominant EPOC intervention type: Patient-centred.</p> <p>Comparison: Usual care along with Texas Diabetes Council patient education materials.</p> |

|    |                          |                                                                                                                           |                                                                                                                                                                                                                                                                                                                                                                                                                                                                                                                                                                                                                                                                                                                                                                                                                                                                                                                                                                                                                                                                                                                                                                                                                                                                                                                 |
|----|--------------------------|---------------------------------------------------------------------------------------------------------------------------|-----------------------------------------------------------------------------------------------------------------------------------------------------------------------------------------------------------------------------------------------------------------------------------------------------------------------------------------------------------------------------------------------------------------------------------------------------------------------------------------------------------------------------------------------------------------------------------------------------------------------------------------------------------------------------------------------------------------------------------------------------------------------------------------------------------------------------------------------------------------------------------------------------------------------------------------------------------------------------------------------------------------------------------------------------------------------------------------------------------------------------------------------------------------------------------------------------------------------------------------------------------------------------------------------------------------|
|    |                          |                                                                                                                           |                                                                                                                                                                                                                                                                                                                                                                                                                                                                                                                                                                                                                                                                                                                                                                                                                                                                                                                                                                                                                                                                                                                                                                                                                                                                                                                 |
| 11 | Frosch<br>2011<br>USA    | A video behavioural support intervention by nurse educators with a workbook followed by 5 sessions of telephone coaching. | <p>Intervention participants received a 24 minute long CDC program with an accompanying booklet called "Living with Diabetes: Making lifestyle changes to last a lifetime"- this was developed by the Foundation for Informed Decision Making. The participants were also entitled to have up to 5 sessions of telephone coaching with a bilingual nurse educator, trained in patient-centred approaches to diabetes management and motivational enhancement- with a goal to collaborate with participants in identifying behavioural goals and a behavioural plan.</p> <p>The first session was 60 minutes in length (2 weeks after enrollment), the second and third were 30 minutes, fourth and fifth were 15 minutes. Interval between telephone coaching was open to participants and nurse educators to negotiate. Both groups received a telephone call one week after enrollment to review intervention materials.</p> <p>Five coaching sessions (spread over a max duration of 2.5 hours) and a 24-minute DVD to watch, as well as a booklet on lifestyle changes in diabetes.</p> <p>Predominant EPOC intervention type: Patient-centred.</p> <p>Comparison: Usual care. Participants also received a 20-page brochure entitled "4 steps to control your diabetes for life" developed by the NIH.</p> |
| 12 | Guerci<br>2003<br>France | A self-monitoring of blood glucose intervention<br><br>Auto-Surveillance Intervention Active (ASIA) study.                | <p>Self monitoring of blood glucose (SMBG):</p> <p>Patients received initial training by their GP at the initial inclusion visit. Patients were required to perform at least six capillary assays a week (3 different days, including the weekend).</p> <p>Standardised management including medications, blood glucose level, diet and physical exercise.</p> <p>Five visits were conducted during the intervention. At each visit, a clinical evaluation was performed. Laboratory values took place at 3 visits. At the third visit the GP could modify the treatments based upon the SBGM. At each consultation the patients were advised about management for T2DM.</p> <p>The intervention period was 24 weeks. Followed up every 6 weeks.</p> <p>Five visits were conducted during the intervention. At each visit, a clinical evaluation was performed (weight, SBP, DBP). Laboratory values took place at 3 visits.. At the third visit the GP could modify the treatments based upon the SBGM. . At each consultation the patients were advised about management of T2DM.</p> <p>Predominant EPOC intervention type: Patient-centred.</p> <p>Comparison: Usual care.</p>                                                                                                                              |
| 13 | Heisler<br>2010          | Reciprocal peer support                                                                                                   | Initial face to face meeting in groups of 4-18 (in two age cohorts to aid cohesion and help patients get an age matched peer partner). Patients received \$20 for the initial and 6 monthly assessment.                                                                                                                                                                                                                                                                                                                                                                                                                                                                                                                                                                                                                                                                                                                                                                                                                                                                                                                                                                                                                                                                                                         |

|    |                        |                                                       |                                                                                                                                                                                                                                                                                                                                                                                                                                                                                                                                                                                                                                                                                                                                                                                                                                                                                                                                                                                                                                                                                                                                                                                                                                                                                                                               |
|----|------------------------|-------------------------------------------------------|-------------------------------------------------------------------------------------------------------------------------------------------------------------------------------------------------------------------------------------------------------------------------------------------------------------------------------------------------------------------------------------------------------------------------------------------------------------------------------------------------------------------------------------------------------------------------------------------------------------------------------------------------------------------------------------------------------------------------------------------------------------------------------------------------------------------------------------------------------------------------------------------------------------------------------------------------------------------------------------------------------------------------------------------------------------------------------------------------------------------------------------------------------------------------------------------------------------------------------------------------------------------------------------------------------------------------------|
|    | USA                    |                                                       | <p>Reciprocal Peer support (RPS)<br/>3 hour group session facilitated by a care manager and research associate. Action planning on laboratory results. Training in peer communication, paired with an age-matched peer for peer support.<br/>Encouraged to call each other at least once per week.. Given a DVD on communication skill and a diabetes self management work book.<br/>Also offered three 1.5 hour group sessions at months 1,3 and 6- entirely patient-driven to discuss progress on action plans. Facilitation by a care manager or research associate.</p> <p>The care managers went through training- 4 hour course on motivational interviewing.</p> <p>Nurse care manager (NCM) was usual care: Attended a 1.5 hour session, led by the NCM, to discuss the results from the initial assessment, review results, ask questions and get information. Their care manager's phone number was given and follow up phone calls and face to face meetings were encouraged. Patients were provided with diabetes self management educational materials. In effect this is enhanced usual care- as many patients are not aware of and do not avail of this.</p> <p>Predominant EPOC intervention type: Patient-centred.</p> <p>Comparison: The comparator was enhanced usual care with nurse care management.</p> |
| 14 | Jacobs<br>2012<br>USA  | A pharmacist assisted medication program intervention | <p>PAMPERED (pharmacist assisted medication program enhancing the regulation of diabetes) study:</p> <p>An initial pharmacist-patient clinic visit at baseline involved obtaining a comprehensive medication review; performing a targeted physical assessment including checking BMI, BP and a foot examination; education on diabetes; ordering laboratory values; reviewing, modifying and monitoring the patient's medication and providing detailed counselling on all therapies; facilitating self-monitoring of blood glucose; and providing reinforcement of dietary guidelines and exercise. These recommendations were based on most recent guidance. Approval by the patient's PCP was required before a treatment recommendation was made.</p> <p>Patients were required to attend a minimum of three visits with the pharmacist; at baseline, 6 months and 12 months for focused preventive and secondary diabetes management. Additional visits arranged as clinically appropriate. Laboratory outcomes checked at baseline, 6 and 12 months. On average 6.5 office visits with a pharmacist occurred over the 12 months.</p> <p>Predominant EPOC intervention type: Organisational.</p> <p>Comparison: Usual care.</p>                                                                                         |
| 15 | Jameson<br>2010<br>USA | A pharmacist collaborative management intervention    | <p>One pharmacist provided the intervention to the entire intervention group. This pharmacist was a board certified pharmacotherapy specialist, had an American Society of Health-System Pharmacists diabetes management traineeship, a postgraduate course in diabetes management from the American Diabetes Association and an educators training program.</p> <p>Patients met the pharmacist at the primary care site for an assessment of medication adherence, barriers to optimizing glucose control and a medication review. Individualized education was provided regarding self-management, lifestyle, medications and monitoring. Guidelines were followed. This included early switching to insulin after failure of 2 oral medications. The PCP approved any changes.</p> <p>After this visit, subsequent visits depended on control. Telephone calls also included.</p>                                                                                                                                                                                                                                                                                                                                                                                                                                          |

|    |                          |                                                  |                                                                                                                                                                                                                                                                                                                                                                                                                                                                                                                                                                                                                                                                                                                                                                                                                                                                                                                                                                                                                                                                                                                                                                                                                                                                     |
|----|--------------------------|--------------------------------------------------|---------------------------------------------------------------------------------------------------------------------------------------------------------------------------------------------------------------------------------------------------------------------------------------------------------------------------------------------------------------------------------------------------------------------------------------------------------------------------------------------------------------------------------------------------------------------------------------------------------------------------------------------------------------------------------------------------------------------------------------------------------------------------------------------------------------------------------------------------------------------------------------------------------------------------------------------------------------------------------------------------------------------------------------------------------------------------------------------------------------------------------------------------------------------------------------------------------------------------------------------------------------------|
|    |                          |                                                  | <p>Initial visit. Telephone calls also included. Thereafter conducted as needed- as subsequent visits depended on control.</p> <p>Average 6 office visits and 3 telephone calls per patient over a one-year period. Office visits lasted between 30-60 minutes. Phone calls 10-20 minutes.</p> <p>Predominant EPOC intervention type: Organisational.</p> <p>Comparison: Probably usual care.</p>                                                                                                                                                                                                                                                                                                                                                                                                                                                                                                                                                                                                                                                                                                                                                                                                                                                                   |
| 16 | Jovanovic<br>2004<br>USA | Diabetes case management by a nurse or dietician | <p>Case Management:</p> <p>Intensive diabetes case management was provided to the intervention group in addition to primary care.</p> <p>Study staff met with all patients at the beginning and end of the trial to assess overall health status and collect study outcomes. Quarterly assessments of outcomes were performed.</p> <p>The case manager was either a nurse or a dietician (working in close collaboration with an endocrinologist). Evidence based practice in terms of insulin initiation was agreed with collaboration with the PCP. Potential barriers to care were identified and educational strategies designed to address these barriers. American Diabetes Association goals for diabetes, BP and lipid treatment were used. Flexibility to allow individualized targets allowed. All patients educated about self-management and given a monitor. Diabetic educators assessed lifestyle behaviours and gave patients strategies to improve self-care. Transportation issues addressed to improve visit completion.</p> <p>Unclear how many meetings or interaction with a case manager occurred over the 36 months</p> <p>Predominant EPOC intervention type: Organisational.</p> <p>Comparison: Usual care from primary care provider.</p> |
| 17 | Keogh<br>2011<br>Ireland | Psychological family intervention                | <p>Psychological family intervention for poorly controlled Type 2 diabetes.</p> <p>Three weekly sessions delivered by a health psychologist who had received 16 hours of training in motivational interviewing. The first two sessions lasted 45 minutes, taking place in the patient's home, with a family member. The third and final session was a 10-15 minute telephone call. Each session was tailored to the patient's needs involving a/ challenging negative perceptions of diabetes, 2/ examining how negative perceptions influenced self management and 3/ developing ways to improve self management and mobilise family support. Techniques such as exchange information, elicitation of change talk, reducing resistance, building self-efficacy, problem solving and goal setting were used.</p> <p>Predominant EPOC intervention type: Organisational.</p> <p>Comparison: Usual care.</p>                                                                                                                                                                                                                                                                                                                                                          |
| 18 | Kim                      | A Community-based,                               | Culturally tailored comprehensive T2DM management intervention for Korean American immigrants.                                                                                                                                                                                                                                                                                                                                                                                                                                                                                                                                                                                                                                                                                                                                                                                                                                                                                                                                                                                                                                                                                                                                                                      |

|                                                                                                                         |                                        |                                             |                                                                                                                                                                                                                                                                                                                                                                                                                                                                                                                                                                                                                                                                                                                                                                                                                                                                                                                                                                                                                                                                                                                                                                                                                                                                                                                                                                                         |
|-------------------------------------------------------------------------------------------------------------------------|----------------------------------------|---------------------------------------------|-----------------------------------------------------------------------------------------------------------------------------------------------------------------------------------------------------------------------------------------------------------------------------------------------------------------------------------------------------------------------------------------------------------------------------------------------------------------------------------------------------------------------------------------------------------------------------------------------------------------------------------------------------------------------------------------------------------------------------------------------------------------------------------------------------------------------------------------------------------------------------------------------------------------------------------------------------------------------------------------------------------------------------------------------------------------------------------------------------------------------------------------------------------------------------------------------------------------------------------------------------------------------------------------------------------------------------------------------------------------------------------------|
| 1<br>2<br>3<br>4<br>5<br>6<br>7<br>8<br>9<br>10<br>11<br>12<br>13<br>14<br>15<br>16<br>17<br>18<br>19<br>20<br>21<br>22 | 2009<br><br>USA                        | culturally tailored behavioral intervention | <p>A community based self-help intervention program for type 2 diabetes mellitus (SHIP- DM) involving structured psycho-behavioural education, home glucose and BP telemonitoring and individualized telephone counselling from a bilingual nurse.</p> <p>It consisted of three concurrent programs.</p> <p>First, a 2 hourly weekly education session was delivered for 6 weeks. This was delivered at a community site by trained nurses and a nutritionist- to enhance knowledge and promote diabetes self-care behaviours for glucose control.</p> <p>Secondly, there was home glucose monitoring and teletransmission- this lasted for 24 weeks after the educational program- each patient received monitors and a teletransmission system. Nurses could view this information.</p> <p>Thirdly, monthly telephone counselling by a bilingual nurse for 24 weeks was provided according to a standardized protocol- to reinforce new knowledge, to discuss problems, find solutions and provide emotional support. These lasted 10-25 minutes.</p> <p>At least 7 (one meeting and monthly telephone contact X 6 months)</p> <p>Predominant EPOC intervention type: Patient-centred.</p> <p>Comparison: Usual care with delayed intervention.</p>                                                                                                                                   |
| 23<br>24<br>25<br>26<br>27<br>28<br>29<br>30<br>31<br>32<br>33<br>34<br>35<br>36<br>37<br>38                            | 19<br><br>Krein<br><br>2004<br><br>USA | Case management by nurse practitioners      | <p>Collaborative case management.</p> <p>All participants in trial given a blood pressure monitor, educational material and a periodical newsletter</p> <p>Two nurse practitioner care managers worked with patients and their primary care providers, monitoring and coordinating care for the intervention group for 18 months, through telephone calls, collaborative goal setting and treatment algorithms.</p> <p>There were two nurse case managers. One nurse was present at each site, providing 20 hours of care per week, to approximately 60 patients each. They had a 2 days training program on collaborative goal setting- and training updates at 6-month intervals.</p> <p>Patient contact was predominantly by telephone, though face-to-face contact could happen. Case managers encouraged self-management, diet exercise, provided reminders of screenings and tests, monitored home glucose and BP measures and identified medication changes as needed. Medications treatment algorithms were given to the case managers. Every change was approved by the PCP- being notified of changes by email.</p> <p>Predominant EPOC intervention type: Organisational.</p> <p>Comparison: Usual care. Patients also received educational materials. All participants in trial were given a blood pressure monitor, educational materials and a periodical newsletter.</p> |
| 39<br>40<br>41<br>42<br>43<br>44<br>45<br>46<br>47<br>48<br>49                                                          | 20<br><br>Long                         | Two interventions:                          | Two intervention groups, one control. Received €25 for filling out a survey at Month 0 and Month 6. Also were notified of their starting HbA1c level and of the                                                                                                                                                                                                                                                                                                                                                                                                                                                                                                                                                                                                                                                                                                                                                                                                                                                                                                                                                                                                                                                                                                                                                                                                                         |

|                                                                                                                               |                                             |                                                                        |                                                                                                                                                                                                                                                                                                                                                                                                                                                                                                                                                                                                                                                                                                                                                                                                                                                                                                                                                                                                                                                                                                                                                                                                                                                                         |
|-------------------------------------------------------------------------------------------------------------------------------|---------------------------------------------|------------------------------------------------------------------------|-------------------------------------------------------------------------------------------------------------------------------------------------------------------------------------------------------------------------------------------------------------------------------------------------------------------------------------------------------------------------------------------------------------------------------------------------------------------------------------------------------------------------------------------------------------------------------------------------------------------------------------------------------------------------------------------------------------------------------------------------------------------------------------------------------------------------------------------------------------------------------------------------------------------------------------------------------------------------------------------------------------------------------------------------------------------------------------------------------------------------------------------------------------------------------------------------------------------------------------------------------------------------|
| 1<br>2<br>3<br>4<br>5<br>6<br>7<br>8<br>9<br>10<br>11<br>12<br>13<br>14<br>15<br>16<br>17<br>18<br>19<br>20<br>21<br>22<br>23 | 2012<br><br>USA                             | Peer mentoring<br><br>Financial incentivisation of patients            | <p>ADA and VA recommendations.</p> <p>1/ Peer mentoring:<br/>Patients in this group matched to a peer supporter within 1-3 weeks. Peer reviewers were all African American patients with prior poor T2Dm control in the past but well controlled recently. They were matched by sex and age (+/- 10 years).</p> <p>Training: They received a 1-hour long 1:1 training session informed by motivational interviewing techniques. Uncertain who trained the peer mentors.</p> <p>No monitoring of the calls. The mentor-mentee contacts were all telephone calls. Mentors were incentivized with \$20 per month if they talked at least once per week with their mentee. Mentors were also given \$25 after the training session and after an exit interview.</p> <p>Peer mentoring: Aiming to have 4 calls per month for 6 months. The Results showed 38% mentors talked 4 times per month during the first month and by Month 6, that reduced to 16%</p> <p>2/ Financial incentives<br/>In the financial incentive arm, participants were told that they would receive \$100 at 6 months if their HbA1c level decreased by 1%, and \$200 if it reduced by 2% or to 6.5%.</p> <p>Predominant EPOC intervention type: Patient-centred.</p> <p>Comparison: Usual care.</p> |
| 24<br>25<br>26<br>27<br>28<br>29<br>30<br>31<br>32<br>33<br>34                                                                | 21<br><br>Maislos<br><br>2002<br><br>Israel | A mobile clinic providing interdisciplinary care                       | <p>Interdisciplinary care via a mobile clinic offered by the Western Negev Mobile Clinic Diabetes Program (WNMCDP).</p> <p>WNMCDP is a weekly mobile diabetes clinic aimed to provide interdisciplinary care for patients, in primary care facilities. An initial visit involved a meeting with a diabetologist, the dietician and a nurse educator. After this regular follow visits were scheduled. The team held a weekly evening meeting at the clinic and the nurse and dietician have an additional weekly meeting at the primary care site. At the meeting, all patients received dietary counselling and have a session with the nurse educator. Continuation of treatment and follow up visits are scheduled according to the patient's condition. Special emphasis was placed on education, to improve compliance and lifestyle behaviours.</p> <p>Mobile clinic visited weekly.</p> <p>Predominant EPOC intervention type: Organisational.</p> <p>Comparison: Usual care.</p>                                                                                                                                                                                                                                                                                |
| 35<br>36<br>37<br>38<br>39<br>40<br>41<br>42<br>43<br>44<br>45<br>46<br>47<br>48<br>49                                        | 22<br><br>Mathers<br><br>2012<br><br>UK     | Patient decision aid to improve decision quality and glycaemic control | <p>PANDAs study: using patient decision aid (PDA):</p> <p>A complex intervention with three components; PDA, healthcare professional training workshop and use of PDA in a consultation.</p> <p>Development of PDA done with MRC framework- to facilitate decision making between clinicians and patients</p>                                                                                                                                                                                                                                                                                                                                                                                                                                                                                                                                                                                                                                                                                                                                                                                                                                                                                                                                                           |



|    |                                               |                                                                                                                                                                                          |                                                                                                                                                                                                                                                                                                                                                                                                                                                                                                                                                                                                                                                                                                                                                                                                                                                                                                                                                                                                                                                                                                                                                                                             |
|----|-----------------------------------------------|------------------------------------------------------------------------------------------------------------------------------------------------------------------------------------------|---------------------------------------------------------------------------------------------------------------------------------------------------------------------------------------------------------------------------------------------------------------------------------------------------------------------------------------------------------------------------------------------------------------------------------------------------------------------------------------------------------------------------------------------------------------------------------------------------------------------------------------------------------------------------------------------------------------------------------------------------------------------------------------------------------------------------------------------------------------------------------------------------------------------------------------------------------------------------------------------------------------------------------------------------------------------------------------------------------------------------------------------------------------------------------------------|
|    | Cluster RCT                                   |                                                                                                                                                                                          | <p>Doctors and nurses involved with diabetes care in the practice attended a 2-hour training session on how to use the PANDAs decision aid (shared decision making, communication skills, the evidence of different treatment options).</p> <p>The PANDAs decision aid was given to the patient prior to the consultation with the nurse or GP- it included information about insulin or other treatments, presented probabilities of outcomes, it clarified patient values and gave structured guidance. The patient then saw the GP and nurse, facilitated with the use of the PANDAs aid.</p> <p>This was a one off intervention given on 1 day</p> <p>Predominant EPOC intervention type: Professional.</p> <p>Comparison: Usual care.</p>                                                                                                                                                                                                                                                                                                                                                                                                                                              |
| 23 | McDermott<br>2015<br>Australia<br>Cluster RCT | Community-based health-worker led case management approach to the care of Indigenous adults with poorly controlled type 2 diabetes in primary care services in remote northern Australia | <p>Each site allocated to the intervention arm recruited an Indigenous health worker resident in the community (selected by the health service) to work as part of the primary care team, and allocated a caseload of between 9 and 26 clients. The health workers with low caseloads worked part-time. All health workers at the commencement of the study received an intensive 3-week training in clinical aspects of diabetes and other chronic condition care, including how to support patients in self-management skills, advice on medications, routine foot care, nutrition, smoking cessation, follow up referrals to other providers, and scheduled tests.</p> <p>Length: During the 18 month intervention period, the health workers attended two workshops where they underwent refresher training, including in Good Clinical Practice and reflective practice. During these sessions, they reported on their patients' progress and shared approaches to problem solving with the clinical support team and peers.</p> <p>Predominant EPOC intervention type: Organisational</p> <p>Comparison: Usual care.</p>                                                              |
| 24 | McMahon<br>2005<br>USA                        | Web-based care management                                                                                                                                                                | <p>Web based care management involving training and giving a notebook computer, glucose and blood pressure monitoring devices and access to a care management website. The website provided educational modules, accepted uploads from monitoring devices and had an internal messaging system for patients to communicate with the care manager. Given free internet.</p> <p>Training to each participant for mean of 2.3 hours. Home BP monitoring encouraged three times weekly. Glucose monitoring frequency was individualized. Participants could communicate with a care manager through the website. If they did not use the website for two weeks, they were contacted by phone.</p> <p>An advanced practice nurse reviewed patient information and provided recommendation to the PCP about treatment changes, based upon guidelines.</p> <p>Episodes: Unclear, one training session and then self-usage of web management (patients contacted if they didn't use after 2 weeks). 1 year.</p> <p>Predominant EPOC intervention type: Organisational.</p> <p>Comparison: Usual care. All participants attended a self-management educational session (prior to randomization).</p> |

|    |                                        |                                                                                                  |                                                                                                                                                                                                                                                                                                                                                                                                                                                                                                                                                                                                                                                                                                                                                                                                                             |
|----|----------------------------------------|--------------------------------------------------------------------------------------------------|-----------------------------------------------------------------------------------------------------------------------------------------------------------------------------------------------------------------------------------------------------------------------------------------------------------------------------------------------------------------------------------------------------------------------------------------------------------------------------------------------------------------------------------------------------------------------------------------------------------------------------------------------------------------------------------------------------------------------------------------------------------------------------------------------------------------------------|
| 25 | Mons<br>2013<br>Germany                | Supportive telephone counseling                                                                  | <p>Supportive telephone counseling intervention led by practice nurses of the participating GP practices- monthly over 12 months. Each nurse was trained before hand. Each call lasted 10 minutes, was structured and included questions on patients' physical and mental condition, medication adherence, symptoms, and lifestyle advice. The items were designed to motivate the patients, identify barriers and help self-management.</p> <p>Monthly over 12 months. Over 90% had 10-12 sessions.</p> <p>Predominant EPOC intervention type: Patient-centred.</p> <p>Comparison: Usual care.</p>                                                                                                                                                                                                                         |
| 26 | O'Connor<br>2014<br>USA<br>Cluster RCT | Telephone Outreach to Improve Medication Adherence and Metabolic Control in Adults With Diabetes | <p>The telephone intervention was delivered by interventionists who were pharmacists, diabetes educators, or nurse health managers trained in the use of the study protocol and intervention. Those randomized to the intervention, who had recently been prescribed a new medication for poorly controlled T2DM, received a single structured telephone call to ascertain if the patient had started the medication. Positive reinforcement was made to those who had started. For those who had not started, the interventionist probed for reasons of non-adherence and resolved to solve any barriers.</p> <p>Length: One phone-call lasting &lt; 5 minutes. Most calls occurred within 2-6 weeks after prescription date.</p> <p>Predominant EPOC intervention type: Organisational</p> <p>Comparison: Usual care.</p> |
| 27 | Odegard<br>2005<br>USA                 | A pharmacist intervention care management intervention                                           | <p>Pharmacist intervention was composed of a diabetes care plan (DCP), a regular pharmacist-patient communication on diabetes care progress and pharmacist-provider communication on the subject's diabetes care progress. Medication related problems were identified. The intervention commenced one week after baseline data interview. A face-to-face appointment created this DCP which was communicated to the PCP.</p> <p>Weekly face-to-face or telephone communication was kept with the patient and the pharmacist- then reduced to monthly when deemed necessary over a 6-month period.</p> <p>On average there were 4.5 telephone contacts and 2.1 in person visits.</p> <p>Predominant EPOC intervention type: Organisational.</p> <p>Comparison: Usual care.</p>                                              |
| 28 | Palmas<br>2014<br>USA                  | Community health worker (CHW) intervention in an Hispanic population                             | <p>12-month CHW intervention or enhanced usual care</p> <p>Two full time CHWs delivered a multicomponent intervention that included one-to-one visits, group visits and telephone follow up. They used the Small Steps, Big Rewards framework. Goal setting and discussing barriers were features of the visits. A needs assessment was performed throughout the year.</p> <p>Episodes of care:<br/>Aimed for 4 1:1 visits, 10 groups sessions and 20 follow up phone calls over the year per subject.</p>                                                                                                                                                                                                                                                                                                                  |

|    |                                                           |                                                                            |                                                                                                                                                                                                                                                                                                                                                                                                                                                                                                                                                                                                                                                                                                                                                                                                                                                                                                                                                                                                                                                                                                                                                                                                                                                                                                                                                                                                                                                                                                                                                                                                                                                                                                                                                                         |
|----|-----------------------------------------------------------|----------------------------------------------------------------------------|-------------------------------------------------------------------------------------------------------------------------------------------------------------------------------------------------------------------------------------------------------------------------------------------------------------------------------------------------------------------------------------------------------------------------------------------------------------------------------------------------------------------------------------------------------------------------------------------------------------------------------------------------------------------------------------------------------------------------------------------------------------------------------------------------------------------------------------------------------------------------------------------------------------------------------------------------------------------------------------------------------------------------------------------------------------------------------------------------------------------------------------------------------------------------------------------------------------------------------------------------------------------------------------------------------------------------------------------------------------------------------------------------------------------------------------------------------------------------------------------------------------------------------------------------------------------------------------------------------------------------------------------------------------------------------------------------------------------------------------------------------------------------|
|    |                                                           |                                                                            | <p>Predominant EPOC intervention type: Patient-centred.</p> <p>Comparison: 'Enhanced usual care'. Spanish-language educational material posted every three months, preceded by phone calls, to ensure participants received the brochures.</p>                                                                                                                                                                                                                                                                                                                                                                                                                                                                                                                                                                                                                                                                                                                                                                                                                                                                                                                                                                                                                                                                                                                                                                                                                                                                                                                                                                                                                                                                                                                          |
| 29 | <p>Phillis-Tsimikas</p> <p>2011</p> <p>USA</p>            | <p>Peer-led diabetes education programs in high-risk Mexican Americans</p> | <p>Assessments at month 0, 4 (post intervention) and 10- intervention participants were given a glucometer and a small gift card. The Project Dulce (intervention) group received eight weekly 2 hour diabetes self management classes for two months; and then monthly support groups, each 2 hours in length, led by a trained peer educator. Before the intervention those individuals, living in this community, with diabetes, that had traits of being a good leader were identified and trained over a 3 month period. Peer educators spent 40 hours learning the curriculum, behavior modification techniques etc. Then they co-taught a session with a trainer, before being supervised giving a session before doing it alone. The curriculum covered many aspect of diabetes management. If patients were noticed not be meeting targets for diabetes care, the peer educator would direct them to the PCP- they would not make any medication related changes themselves.</p> <p>Episodes of care: Unclear how many, but envisaged as 8 weekly classes for two months, then monthly for the next three months.</p> <p>Predominant EPOC intervention type: Patient-centred.</p> <p>Comparison: Usual care.</p>                                                                                                                                                                                                                                                                                                                                                                                                                                                                                                                                               |
| 30 | <p>Polonsky</p> <p>2011</p> <p>USA</p> <p>Cluster RCT</p> | <p>Self blood glucose monitoring</p>                                       | <p>STeP (Structured Testing Programme) is a 12-month Cluster RCT assessing efficacy of structured self-monitoring of blood glucose (SMBG) in T2DM patients (none on insulin).</p> <p>Both physicians and patients participated in a collaborative programme to gather, interpret and act upon the structured SMBG data, at 3 monthly intervals, to make treatment modifications.</p> <p>The study's duration was 12 months with patient visits occurring at initial screening and baseline followed by visits at months 1, 3, 6, 9, and 12.</p> <p>At all subsequent visits (months 1, 3, 6, 9, and 12), ACG and STG clinic staff collected laboratory samples, recorded changes in medications, and performed brief physical examinations. Point-of-care A1C equipment (A1CNow+ test kit; Bayer Healthcare, Tarrytown, NY) was provided to all practices for clinical use only to assure that differential availability of the equipment did not affect outcomes. Patients in both groups brought their meters to each subsequent visit for electronic data uploading; physicians and clinic staff were blinded to these data and all other study-collected measures. Patients also reported all changes made to their diabetes regimen since their last visit. All patients completed the STeP questionnaire and a post-visit questionnaire to record physician discussion of SMBG results and recommendations for pharmacologic and lifestyle changes that occurred during the visit.</p> <p>Predominant EPOC intervention type: Patient-centred.</p> <p>Comparison: 'Enhanced usual care': quarterly diabetes focused physician visits, free blood glucose meters and strips and they were evaluated at months 1, 3, 6, 9 and 12 (like the intervention group).</p> |
| 31 | <p>Quinn</p>                                              | <p>Mobile phone-based</p>                                                  | <p>Mobile phone-based treatment/ behavioural coaching intervention</p>                                                                                                                                                                                                                                                                                                                                                                                                                                                                                                                                                                                                                                                                                                                                                                                                                                                                                                                                                                                                                                                                                                                                                                                                                                                                                                                                                                                                                                                                                                                                                                                                                                                                                                  |

|                                                                                                                         |                                          |                                                                                   |                                                                                                                                                                                                                                                                                                                                                                                                                                                                                                                                                                                                                                                                                                                                                                                                                                                                                                                                                                                                                                                                                                                                                                                                                                                           |
|-------------------------------------------------------------------------------------------------------------------------|------------------------------------------|-----------------------------------------------------------------------------------|-----------------------------------------------------------------------------------------------------------------------------------------------------------------------------------------------------------------------------------------------------------------------------------------------------------------------------------------------------------------------------------------------------------------------------------------------------------------------------------------------------------------------------------------------------------------------------------------------------------------------------------------------------------------------------------------------------------------------------------------------------------------------------------------------------------------------------------------------------------------------------------------------------------------------------------------------------------------------------------------------------------------------------------------------------------------------------------------------------------------------------------------------------------------------------------------------------------------------------------------------------------|
| 1<br>2<br>3<br>4<br>5<br>6<br>7<br>8<br>9<br>10<br>11<br>12<br>13<br>14<br>15<br>16<br>17<br>18<br>19<br>20<br>21<br>22 | 2011<br><br>USA<br><br>Cluster RCT       | treatment/<br>behavioural coaching<br>intervention                                | <p>26 primary care practices, randomly assigned to one of four groups:</p> <p>1/ Coach-only (CO) group- included a mobile diabetes management software application and a web portal. The mobile software allowed patients to enter diabetes self-care data (glucose, diet, medications) on a mobile phone and receive automated, real-time educational, behavioural and motivational messaging specific to the entered data.</p> <p>2/ Coach PCP portal (CPP)- The patient web portal augmented the mobile software and had a secure messaging centre with additional information.</p> <p>3/ Coach PCP portal with decision support (CPDS): This group had providers with access to analysed patient data that could make decisions linked to standards of care.</p> <p>All patients received a glucometer and mobile phone with 1 year unlimited free data and service plan. Diabetes educators intermittently reviewed the patient data. Patients could communicate by phone or electronically to educators. Patients also received an electronic action plan every 2.5 months.</p> <p>Predominant EPOC intervention type: Patient-centred.</p> <p>Comparison: Usual care.</p>                                                                          |
| 23<br>24<br>25<br>26<br>27<br>28<br>29<br>30<br>31<br>32<br>33<br>34<br>35                                              | 32<br><br>Rothman<br><br>2005<br><br>USA | A primary care-based disease management program delivered by trained pharmacists. | <p>Pharmacist intervention: Three pharmacists (trained in the outpatient department) delivered the intervention within the general medicine practice - two of them were diabetic educators. The intervention included intensive educational sessions, evidence-based algorithms, proactive management of clinical parameters and treatment recommendations that were shared with the PCP.</p> <p>A diabetes care coordinator was also part of the intervention and this person addressed health behaviour and education- this coordinator rang patients regularly.</p> <p>Pharmacists rang the patient or met them every 2-4 weeks, or more frequently if needed. Unclear if there was a face to face meeting (probably was in the General Medicine Practice. A coordinator also rang patients from time to time.</p> <p>A median of 45 contacts or care-related activities between pharmacists and patients were recorded; about 38 minutes each month.</p> <p>Predominant EPOC intervention type: Organisational.</p> <p>Comparison: Usual care after a 1-hour management session that was conducted by a clinical pharmacist practitioner from the disease management team, including education and treatment recommendations approved by the PCP.</p> |
| 36<br>37<br>38<br>39<br>40<br>41<br>42<br>43<br>44<br>45<br>46<br>47<br>48<br>49                                        | 33<br><br>Schillinger<br><br>2009        | Two interventions:<br><br>Self-Management                                         | <p>Two interventions in the Improving Diabetes Efforts Across Language and Literacy (IDEALL) Project:</p> <p>Two self management support (SMS) systems, conducted in a safety net health system were tested against a control; a) Automated telephone self management support (ATSM) and b) Group medical visits (GMVs).</p>                                                                                                                                                                                                                                                                                                                                                                                                                                                                                                                                                                                                                                                                                                                                                                                                                                                                                                                              |

|    |                    |                                                                                                                      |                                                                                                                                                                                                                                                                                                                                                                                                                                                                                                                                                                                                                                                                                                                                                                                                                                                                                                                                                                                                                                                                                                                                                                                                                                                                                                                                                               |
|----|--------------------|----------------------------------------------------------------------------------------------------------------------|---------------------------------------------------------------------------------------------------------------------------------------------------------------------------------------------------------------------------------------------------------------------------------------------------------------------------------------------------------------------------------------------------------------------------------------------------------------------------------------------------------------------------------------------------------------------------------------------------------------------------------------------------------------------------------------------------------------------------------------------------------------------------------------------------------------------------------------------------------------------------------------------------------------------------------------------------------------------------------------------------------------------------------------------------------------------------------------------------------------------------------------------------------------------------------------------------------------------------------------------------------------------------------------------------------------------------------------------------------------|
|    | USA                | Support via 1/<br>Automated telephone<br>self-management<br>support (ATSM) and 2/<br>Group medical visits<br>(GMVs). | <p>ATSM and GVCs attempt to activate patients, routed in efficacy theory.</p> <p>ATSM:<br/>ATSM patients received automated (pre-recorded) telephone calls over 39 weeks (9 months). Patient responses triggered immediate automated education messages and/ or a subsequent nurse phone follow-up. Each call took 5-10 minutes. The mean number automated calls completed over 9 months was 21.9 (envisaged to be 39); mean number of call backs was 9.2.</p> <p>GVC:<br/>The GVC group received 90-minute monthly sessions over 9 months, with 6-10 participants, co-facilitated by a primary care physician and health educator. Participants in this group received bus tokens and snacks. Mean number of GMVs attended was 4.8 out of 9.</p> <p>There was no specific expectation regarding co-management with the primary care physician. In both interventions action plans regarding self management were generated (information in other papers).</p> <p>All participants received €15 and €25 dollars for the baseline and one year follow up assessment.</p> <p>Predominant EPOC intervention type: Patient-centred.</p> <p>Comparison: Usual care.</p>                                                                                                                                                                                            |
| 34 | Sen<br>2014<br>USA | Financial incentives<br>for home based<br>monitoring- two<br>interventions                                           | <p>Two intervention groups received financial incentives for home-based health monitoring. All three groups received three biometric devices, a self monitoring glucose device, a digital BP monitor and a device to automatically transmit readings from the biometric devices to the study website. All patients were instructed to use the biometric devices daily. In the intervention arms, participants who used all three devices on a given day were entered into a lottery to win something on the following day. In the daily lottery process, numbers between 0-99 were picked by the participant.</p> <p>In the high incentive intervention the average daily reward was €2.80; a two digit match (1: 100 chance) yielded a €100 award and a one digit match (1: 5 chance) yielded a €10 award.</p> <p>In the low incentive intervention, rewards were €50 and €5 respectively, expecting an average daily reward of €1.40.</p> <p>Each day all incentive arm participants were reminded by text message or email informing them of the lottery numbers. A study coordinator met with all participants at 3 and 6 months- participants were paid €25 for each visit.</p> <p>Episodes of care: daily</p> <p>Predominant EPOC intervention type: Financial</p> <p>Comparison: 'Daily home monitoring control group' received biometric devices.</p> |
| 35 | Sugiyama           | Diabetes self-<br>management                                                                                         | Called the Diabetes Self-Care Study, the intervention involved community-based diabetes self-management education (DSME).                                                                                                                                                                                                                                                                                                                                                                                                                                                                                                                                                                                                                                                                                                                                                                                                                                                                                                                                                                                                                                                                                                                                                                                                                                     |

|                                                                                                             |                                       |                                        |                                                                                                                                                                                                                                                                                                                                                                                                                                                                                                                                                                                                                                                                                                                                                                                                                                                                                                                                                                                                                                                                                                                                                                                                                                                                                                                                                                                                                                                                                                                                                                                                                         |
|-------------------------------------------------------------------------------------------------------------|---------------------------------------|----------------------------------------|-------------------------------------------------------------------------------------------------------------------------------------------------------------------------------------------------------------------------------------------------------------------------------------------------------------------------------------------------------------------------------------------------------------------------------------------------------------------------------------------------------------------------------------------------------------------------------------------------------------------------------------------------------------------------------------------------------------------------------------------------------------------------------------------------------------------------------------------------------------------------------------------------------------------------------------------------------------------------------------------------------------------------------------------------------------------------------------------------------------------------------------------------------------------------------------------------------------------------------------------------------------------------------------------------------------------------------------------------------------------------------------------------------------------------------------------------------------------------------------------------------------------------------------------------------------------------------------------------------------------------|
| 1<br>2<br>3<br>4<br>5<br>6<br>7<br>8<br>9<br>10<br>11<br>12<br>13<br>14<br>15<br>16<br>17<br>18<br>19<br>20 | 2015<br><br>USA                       | education by trained health educators. | <p>All study participants were given glucose meters and testing strips, and received a 2-hour training on self-monitoring of blood glucose by a certified diabetes educator. Health educators, who delivered the education, completed a one-year training program and received 8 hours of curricula delivered by the study team about diabetes and its clinical presentations and complications. Additionally, they received 12 hours of training and implementation of the empowerment sessions.</p> <p>Length: Participants in the intervention group received six weekly two-hour group self-care sessions consisting of 8 to 10 persons per group, conducted in English or Spanish, and facilitated by health educators. In the group session, participants identified self-management challenges and discussed why each activity was challenging and how to solve it.</p> <p>Each participant also had a one-on-one session with the health educator to review his or her baseline and follow-up laboratory and biometric data during one of the group sessions.</p> <p>There was also a \$10 gift card for each assessment.</p> <p>Predominant EPOC intervention type: Patient</p> <p>Comparison: Usual care.</p>                                                                                                                                                                                                                                                                                                                                                                                                 |
| 21<br>22<br>23<br>24<br>25<br>26<br>27<br>28<br>29<br>30<br>31<br>32<br>33<br>34<br>35<br>36                | 36<br><br>Tang<br><br>2013<br><br>USA | Online disease management of diabetes  | <p>Online disease management of diabetes: Engaging and Motivating Patients online with Enhanced Resources- Diabetes (EMPOWER-D):</p> <p>A personalized healthcare program (PHCP) comprising nurse care managers authorized to change medications, multi-disciplinary team based care, patient self-management tools and an online communication channel between patients and their healthcare team. This intervention comprised:</p> <ol style="list-style-type: none"> <li>1/ Wireless glucometer uploading of information to the electronic health record</li> <li>2/ A diabetes summary sheet with a personalized action plan and treatment goals, including displaying the risk of a variety of diabetes related complications, medication information and monitoring information.</li> <li>3/ A nutrition log</li> <li>4/ Insulin record</li> <li>5/ Exercise log</li> <li>6/ Online communication/ messaging system</li> <li>7/ Nurse care managers who provide advice and can make medication changes.</li> <li>8/ Patient specific text and video educational material.</li> </ol> <p>On top of this, participants in the intervention group had 3 in-persons visits, firstly a 90 minute group visit introducing the online tools, a 90 minute 1:1 meeting with a nurse care manager to develop a shared care plan and 3/ a 60 minute visit with a registered dietician. Also a pharmacist reviewed all intervention group medications and made recommendations- they were also consulted throughout the trial.</p> <p>Predominant EPOC intervention type: Patient-centred.</p> <p>Comparison: Usual care.</p> |
| 37<br>38<br>39<br>40<br>41<br>42<br>43<br>44<br>45<br>46<br>47<br>48<br>49                                  | 37<br><br>Taylor<br><br>2003          | Nurse care management (NCM)            | <p>Nurse care management (NCM): Initial 90 minute meeting with a registered nurse to review patient medications, lifestyle and psychosocial status. Self-management plan was developed.</p>                                                                                                                                                                                                                                                                                                                                                                                                                                                                                                                                                                                                                                                                                                                                                                                                                                                                                                                                                                                                                                                                                                                                                                                                                                                                                                                                                                                                                             |

|    |                     |                      |                                                                                                                                                                                                                                                                                                                                                                                                                                                                                                                                                                                                                                                                                                                                                                                                                                                                                                                                                                                                                 |
|----|---------------------|----------------------|-----------------------------------------------------------------------------------------------------------------------------------------------------------------------------------------------------------------------------------------------------------------------------------------------------------------------------------------------------------------------------------------------------------------------------------------------------------------------------------------------------------------------------------------------------------------------------------------------------------------------------------------------------------------------------------------------------------------------------------------------------------------------------------------------------------------------------------------------------------------------------------------------------------------------------------------------------------------------------------------------------------------|
|    | USA                 |                      | <p>Then a weekly group class (1-2 hours with 4-10 per class) was scheduled for 4 weeks; including group discussion and problem solving.</p> <p>This was followed with telephone follow-up calls at week 4,5,8,12,16,20,28,36 and 44 (9 in total) from the nurse, averaging 15 minutes each. The nurse care managers gave advice as per agreed protocols. The PCP was called if a change in medication was recommended. The NCMs underwent specific training.</p> <p>Episodes of care: 5 visits and 9 telephone calls</p> <p>Predominant EPOC intervention type: Organisational.</p> <p>Comparison: Some educational materials, otherwise usual care.</p>                                                                                                                                                                                                                                                                                                                                                        |
| 38 | Thom<br>2013<br>USA | Peer health coaching | <p>Potential peer coaches attended 36 hours of training over 8 weeks using a curriculum developed by the study team- learning active listening, non-judgmental communication, helping with diabetes self-management skills, provision of support, assisting with lifestyle change, facilitating medication adherence and understanding and navigation of the health system. There was a written and oral assessment for these persons- those who passed became peer coaches.</p> <p>The peer coach- patient interaction was at the discretion of the patient and peer coach, either in person or by telephone contact, either outside or inside the clinic.</p> <p>The goal was for two telephone contacts every month and two or more in-person contacts over 6 months. They helped devise action plans for the patients.</p> <p>Peer coaches received €125 for training and €25 per client coached each month.</p> <p>Predominant EPOC intervention type: Patient-centred.</p> <p>Comparison: Usual care.</p> |

1  
2  
3  
4  
5  
6  
7  
8  
9  
10  
11  
12  
13  
14  
15  
16  
17  
18  
19  
20  
21  
22  
23  
24  
25  
26  
27  
28  
29  
30  
31  
32  
33  
34  
35  
36  
37  
38  
39  
40  
41  
42  
43  
44  
45  
46  
47  
48  
49  
50  
51  
52  
53  
54  
55  
56  
57  
58  
59  
60

|                       | Allocation concealment (selection bias) | Blinding of participants and personnel (performance bias) | Blinding of outcome assessment (detection bias) | Incomplete outcome data (attrition bias) | Selective reporting (reporting bias) | Other bias |
|-----------------------|-----------------------------------------|-----------------------------------------------------------|-------------------------------------------------|------------------------------------------|--------------------------------------|------------|
| Blackberry 2013       | ?                                       | ?                                                         | ?                                               | ?                                        | ?                                    | ?          |
| Capozza 2015          | ?                                       | ?                                                         | ?                                               | ?                                        | ?                                    | ?          |
| Choe 2005             | ?                                       | ?                                                         | ?                                               | ?                                        | ?                                    | ?          |
| Crowley 2015          | ?                                       | ?                                                         | ?                                               | ?                                        | ?                                    | ?          |
| Dale 2009             | ?                                       | ?                                                         | ?                                               | ?                                        | ?                                    | ?          |
| DePue 2013            | ?                                       | ?                                                         | ?                                               | ?                                        | ?                                    | ?          |
| Edelman 2010          | ?                                       | ?                                                         | ?                                               | ?                                        | ?                                    | ?          |
| Edelman 2015          | ?                                       | ?                                                         | ?                                               | ?                                        | ?                                    | ?          |
| Farmer 2012           | ?                                       | ?                                                         | ?                                               | ?                                        | ?                                    | ?          |
| Forjough 2014         | ?                                       | ?                                                         | ?                                               | ?                                        | ?                                    | ?          |
| Frosch 2011           | ?                                       | ?                                                         | ?                                               | ?                                        | ?                                    | ?          |
| Guerci 2003           | ?                                       | ?                                                         | ?                                               | ?                                        | ?                                    | ?          |
| Heisler 2010          | ?                                       | ?                                                         | ?                                               | ?                                        | ?                                    | ?          |
| Jacobs 2012           | ?                                       | ?                                                         | ?                                               | ?                                        | ?                                    | ?          |
| Jameson 2010          | ?                                       | ?                                                         | ?                                               | ?                                        | ?                                    | ?          |
| Jovanovic 2004        | ?                                       | ?                                                         | ?                                               | ?                                        | ?                                    | ?          |
| Keogh 2011            | ?                                       | ?                                                         | ?                                               | ?                                        | ?                                    | ?          |
| Kim 2009              | ?                                       | ?                                                         | ?                                               | ?                                        | ?                                    | ?          |
| Krein 2004            | ?                                       | ?                                                         | ?                                               | ?                                        | ?                                    | ?          |
| Long 2012             | ?                                       | ?                                                         | ?                                               | ?                                        | ?                                    | ?          |
| Maislos 2002          | ?                                       | ?                                                         | ?                                               | ?                                        | ?                                    | ?          |
| Mathers 2012          | ?                                       | ?                                                         | ?                                               | ?                                        | ?                                    | ?          |
| McDermott 2015        | ?                                       | ?                                                         | ?                                               | ?                                        | ?                                    | ?          |
| McMahon 2005          | ?                                       | ?                                                         | ?                                               | ?                                        | ?                                    | ?          |
| Mons 2013             | ?                                       | ?                                                         | ?                                               | ?                                        | ?                                    | ?          |
| O'Connor 2014         | ?                                       | ?                                                         | ?                                               | ?                                        | ?                                    | ?          |
| Odegard 2005          | ?                                       | ?                                                         | ?                                               | ?                                        | ?                                    | ?          |
| Palmas 2014           | ?                                       | ?                                                         | ?                                               | ?                                        | ?                                    | ?          |
| Phillis-Tsimikas 2011 | ?                                       | ?                                                         | ?                                               | ?                                        | ?                                    | ?          |
| Polonsky 2011         | ?                                       | ?                                                         | ?                                               | ?                                        | ?                                    | ?          |
| Quinn 2011            | ?                                       | ?                                                         | ?                                               | ?                                        | ?                                    | ?          |
| Rothman 2005          | ?                                       | ?                                                         | ?                                               | ?                                        | ?                                    | ?          |
| Schillinger 2009      | ?                                       | ?                                                         | ?                                               | ?                                        | ?                                    | ?          |
| Sen 2014              | ?                                       | ?                                                         | ?                                               | ?                                        | ?                                    | ?          |
| Sugiyama 2015         | ?                                       | ?                                                         | ?                                               | ?                                        | ?                                    | ?          |
| Tang 2013             | ?                                       | ?                                                         | ?                                               | ?                                        | ?                                    | ?          |
| Taylor 2003           | ?                                       | ?                                                         | ?                                               | ?                                        | ?                                    | ?          |
| Thom 2013             | ?                                       | ?                                                         | ?                                               | ?                                        | ?                                    | ?          |

215x279mm (150 x 150 DPI)



## Appendix 5: Overall quality assessment and predominant EPOC intervention type

| Study | Study_ID         | Year | Predominant EPOC intervention type | Overall quality assessment |
|-------|------------------|------|------------------------------------|----------------------------|
| 1     | Blackberry       | 2009 | Patient                            | Low-risk                   |
| 2     | Capozza          | 2015 | Patient                            | Unclear-risk               |
| 3     | Choe             | 2012 | Organisational                     | Unclear-risk               |
| 4     | Crowley          | 2015 | Organisational                     | Low-risk                   |
| 5     | Dale             | 2003 | Patient                            | Unclear-risk               |
| 6     | DePue            | 2011 | Organisational                     | Low-risk                   |
| 7     | Edelman          | 2012 | Organisational                     | Low-risk                   |
| 8     | Edelman15        | 2015 | Organisational                     | Unclear-risk               |
| 9     | Farmer           | 2013 | Organisational                     | Low-risk                   |
| 10    | Forjough         | 2013 | Patient                            | High-risk                  |
| 11    | Frosch           | 2005 | Patient                            | Low-risk                   |
| 12    | Guerci           | 2013 | Patient                            | High-risk                  |
| 13    | Heisler          | 2010 | Patient                            | Unclear-risk               |
| 14    | Jacobs           | 2014 | Organisational                     | High-risk                  |
| 15    | Jameson          | 2011 | Organisational                     | Unclear-risk               |
| 16    | Jovanovic        | 2010 | Organisational                     | Low-risk                   |
| 17    | Keogh            | 2012 | Organisational                     | Low-risk                   |
| 18    | Kim              | 2010 | Patient                            | Low-risk                   |
| 19    | Krein            | 2004 | Organisational                     | Low-risk                   |
| 20    | Long             | 2009 | Patient                            | Unclear-risk               |
| 21    | Maislos          | 2004 | Organisational                     | High-risk                  |
| 22    | Mathers          | 2012 | Professional                       | Low-risk                   |
| 23    | McDermott        | 2015 | Organisational                     | Low-risk                   |
| 24    | McMahon          | 2004 | Organisational                     | Low-risk                   |
| 25    | Mons             | 2005 | Patient                            | Low-risk                   |
| 26    | O'Connor         | 2014 | Organisational                     | Low-risk                   |
| 27    | Odegard          | 2005 | Organisational                     | Unclear-risk               |
| 28    | Palmas           | 2014 | Patient                            | Low-risk                   |
| 29    | Phillis-Tsimikas | 2011 | Patient                            | Unclear-risk               |
| 30    | Polonsky         | 2011 | Patient                            | Unclear-risk               |
| 31    | Quinn            | 2011 | Patient                            | Low-risk                   |
| 32    | Rothman          | 2005 | Organisational                     | Low-risk                   |
| 33    | Schillinger      | 2009 | Patient                            | Low-risk                   |
| 34    | Sen              | 2014 | Financial                          | Low-risk                   |
| 35    | Sugiyama         | 2015 | Patient                            | Low-risk                   |
| 36    | Tang             | 2013 | Patient                            | Low-risk                   |
| 37    | Taylor           | 2003 | Organisational                     | Unclear-risk               |
| 38    | Thom             | 2013 | Patient                            | Unclear-risk               |

Appendix 6: Funnel plot of included studies

a. Funnel plot of studies included in the HbA1c analysis

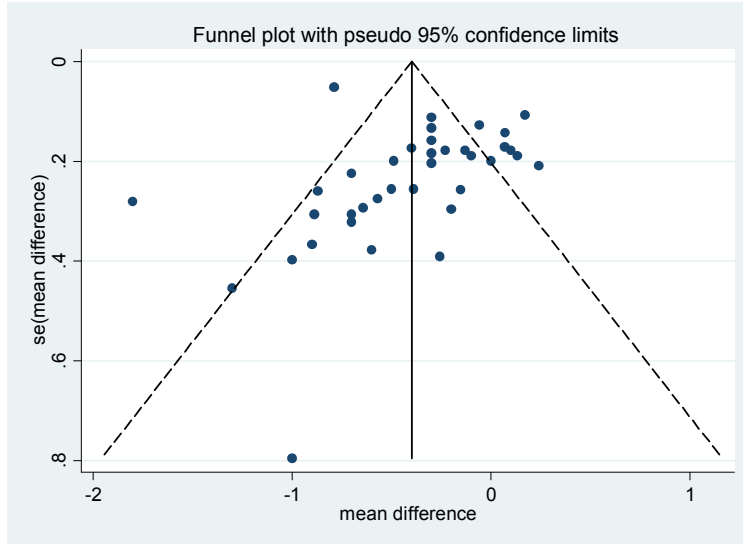

b. Funnel plot of studies included in the DBP analysis

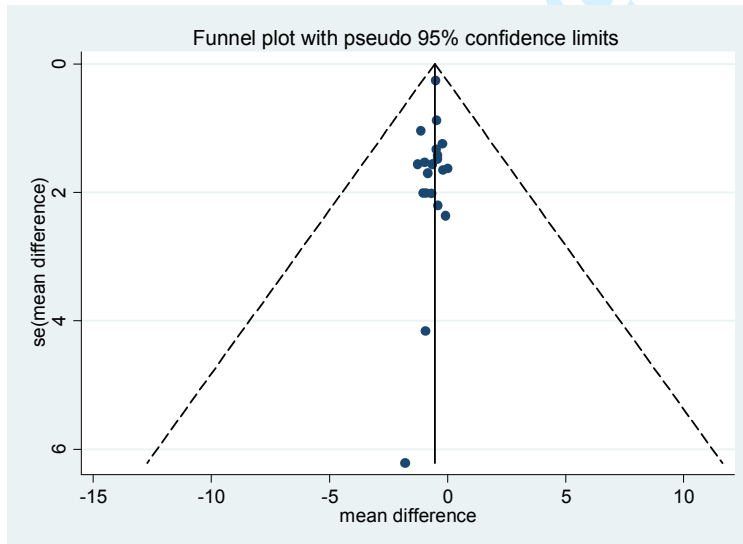

**c. Funnel plot of studies included in the SBP analysis**

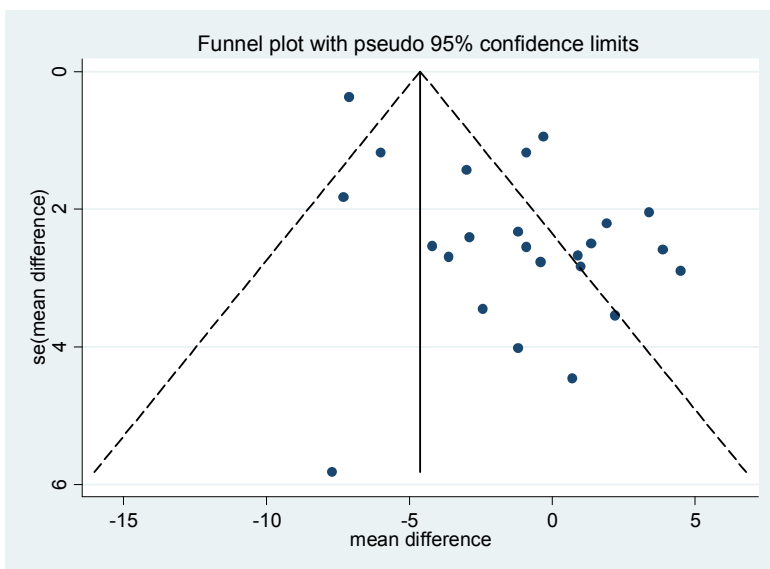

**d. Funnel plot of studies included in the lipid analysis**

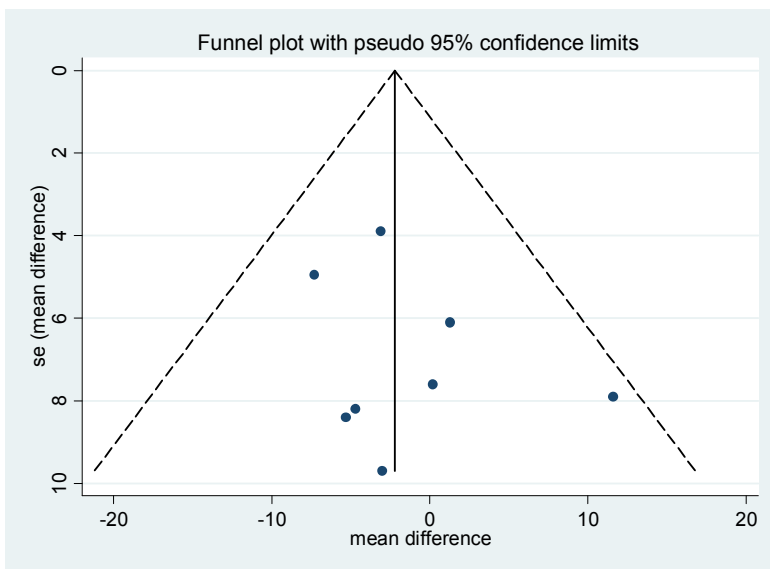

1  
2  
3  
4  
5  
6  
7  
8  
9  
10  
11  
12  
13  
14  
15  
16  
17  
18  
19  
20  
21  
22  
23  
24  
25  
26  
27  
28  
29  
30  
31  
32  
33  
34  
35  
36  
37  
38  
39  
40  
41  
42  
43  
44  
45  
46  
47  
48  
49  
50  
51  
52  
53  
54  
55  
56  
57  
58  
59  
60

Appendix 7. Effects of interventions on systolic blood pressure

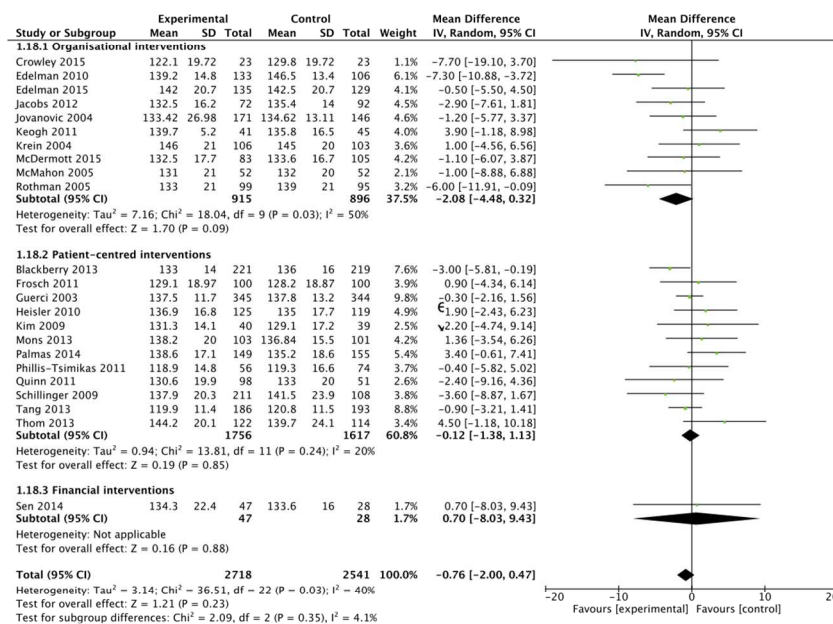

215x279mm (150 x 150 DPI)

Appendix 8. Effects of interventions on diastolic blood pressure

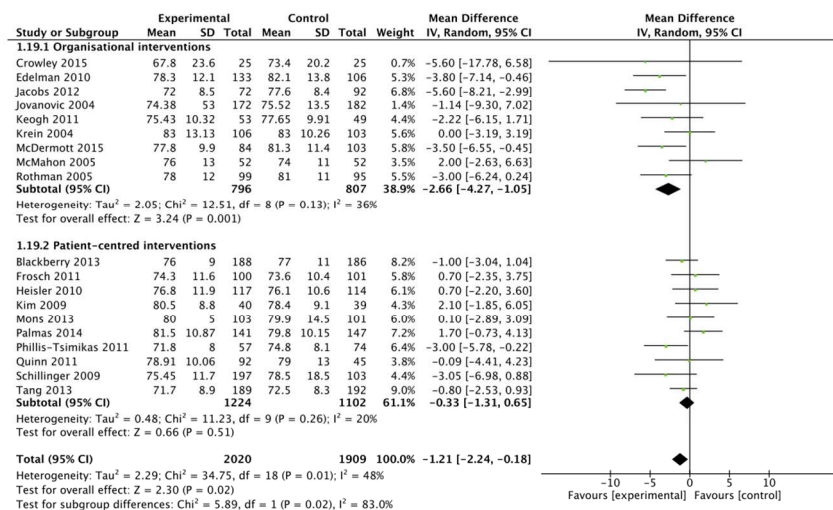

215x279mm (150 x 150 DPI)

1  
2  
3  
4  
5  
6  
7  
8  
9  
10  
11  
12  
13  
14  
15  
16  
17  
18  
19  
20  
21  
22  
23  
24  
25  
26  
27  
28  
29  
30  
31  
32  
33  
34  
35  
36  
37  
38  
39  
40  
41  
42  
43  
44  
45  
46  
47  
48  
49  
50  
51  
52  
53  
54  
55  
56  
57  
58  
59  
60

Appendix 9: Effects of interventions on total cholesterol

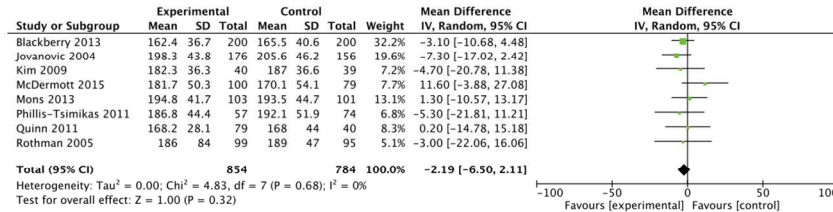

215x279mm (150 x 150 DPI)

## Appendix 9: Secondary outcomes measured and results

| Number | Study      | Mental health outcomes                             | Psychosocial outcomes                                                                                                                                                                             | Adherence outcomes | Other physical outcomes | Healthcare utilisation outcomes                                                                                                                                                                                                                                                                          | Medication related outcomes |
|--------|------------|----------------------------------------------------|---------------------------------------------------------------------------------------------------------------------------------------------------------------------------------------------------|--------------------|-------------------------|----------------------------------------------------------------------------------------------------------------------------------------------------------------------------------------------------------------------------------------------------------------------------------------------------------|-----------------------------|
| 1      | Blackberry | Major depression<br>1.09 (0.49 to 2.46)<br>p= 0.83 | Quality of life 0.02 (CI -0.01 to 0.05) p =0.16<br><br>Diabetes self efficacy -0.06 (CI - 2.22 to 2.10) p 0.96<br><br>Diabetes support -0.09 (CI - 0.01 to 0.18) p 0.08                           |                    |                         |                                                                                                                                                                                                                                                                                                          |                             |
| 2      | Capozza    |                                                    | Patient interaction and satisfaction (CSQ8) with the program by means of survey-intervention patients all scoring over 3 on a four point satisfaction scale. No clear comparison with usual care. |                    |                         |                                                                                                                                                                                                                                                                                                          |                             |
| 3      | Choe       |                                                    |                                                                                                                                                                                                   |                    |                         | Process measures:<br>(% before, % after, p value)<br><br>Rate of HbA1c measurement: 82.9% 92.3% 0.21<br><br>Dilated retinal examination: 74.3% 97.3% p= 0.004<br><br>Urine ACR or use of ACE Inhibitors: 85.7% 94.9% p= 0.18<br><br>Monofilament testing for diabetic neuropathy by chart review over 24 |                             |

1  
2  
3  
4  
5  
6  
7  
8  
9  
10  
11  
12  
13  
14  
15  
16  
17  
18  
19  
20  
21  
22  
23  
24  
25  
26  
27  
28  
29  
30  
31  
32  
33  
34  
35  
36  
37  
38  
39  
40  
41  
42  
43  
44  
45  
46  
47  
48  
49

|   |         |                                                          |                                                                                                                                                                                                                                                                                                                                                                                                                                                                                                                                                                                                                             |                                                                                                      |                                                                                                                                                                                                                                                                                                                                                                      |                                       |  |
|---|---------|----------------------------------------------------------|-----------------------------------------------------------------------------------------------------------------------------------------------------------------------------------------------------------------------------------------------------------------------------------------------------------------------------------------------------------------------------------------------------------------------------------------------------------------------------------------------------------------------------------------------------------------------------------------------------------------------------|------------------------------------------------------------------------------------------------------|----------------------------------------------------------------------------------------------------------------------------------------------------------------------------------------------------------------------------------------------------------------------------------------------------------------------------------------------------------------------|---------------------------------------|--|
|   |         |                                                          |                                                                                                                                                                                                                                                                                                                                                                                                                                                                                                                                                                                                                             |                                                                                                      |                                                                                                                                                                                                                                                                                                                                                                      | months: 62.9% 92.3% p=0.002           |  |
| 4 | Crowley | Depression (PHQ-9): mean difference was not significant. | Diabetes self-management (Self-care inventory revised) SCI-R: mean difference was +7.0 (p=0.047) in favour of intervention                                                                                                                                                                                                                                                                                                                                                                                                                                                                                                  | Self reported medication adherence (Morisky medication adherence scale 4): nonsignificant difference |                                                                                                                                                                                                                                                                                                                                                                      | Adverse events similar in both groups |  |
| 5 | Dale    |                                                          | Diabetes distress (PAID) adjusted score showed no significant difference for two intervention groups versus control.<br><br>Self efficacy (DMSES) adjusted score showed no significant difference for two intervention groups versus control. PS-CG, +4.17, p=0.28 DSN-CG, +0.38, p=0.94.<br><br>Self efficacy (DMSES) improved for the patients in the peer support group but there were no significant differences between groups; diabetes related problems (PAID) reduced for those in the diabetes nurse specialists group. In all groups the HbA1c improved, but there were no significant differences between groups |                                                                                                      | Normal ACR: 1.05 (0.62 to 1.75) p= 0.87<br><br>Normal eGFR: 0.92 (0.55 to 1.53) p 0.76<br><br>Current smoker 0.043 (0.55 to 1.53) p 0.72<br><br>Healthy weight (BMI<25) 2.19 (1.1 to 4.38) p=0.03<br><br>Weight 0.12 (-1.53 to 1.77) p=0.89<br><br>Waist circumference Men 0.90 (-1.40 to 3.19) p=0.44<br><br>Waist circumference Women -1.52 (-4.08 to 1.04) p=0.24 |                                       |  |
| 6 | DePue   |                                                          | Mean perceived competence score significant difference 1.6 (CI: 0.9 to 2.4) p< 0.001<br><br>Physical activity Adapted measures of diabetes beliefs; no data reported.                                                                                                                                                                                                                                                                                                                                                                                                                                                       | Adherence: self reported medication adherence<br><br>Nonsignificant difference.                      |                                                                                                                                                                                                                                                                                                                                                                      |                                       |  |



|    |              |  |                                                                                                                                                                                                                                                                                                                           |                                                                                                                                      |                                                         |                                                                                                             |                                                                                                                                                                                                                                      |
|----|--------------|--|---------------------------------------------------------------------------------------------------------------------------------------------------------------------------------------------------------------------------------------------------------------------------------------------------------------------------|--------------------------------------------------------------------------------------------------------------------------------------|---------------------------------------------------------|-------------------------------------------------------------------------------------------------------------|--------------------------------------------------------------------------------------------------------------------------------------------------------------------------------------------------------------------------------------|
| 7  | Edelman 2010 |  | Self-efficacy using the Perceived Competence Scale<br><br>Nonsignificant difference                                                                                                                                                                                                                                       | Adherence to medications ???<br>Morisky self-reported medication adherence scale<br><br>Nonsignificant difference                    | BMI nonsignificant differences                          | Adverse events through structured self report and medical record review<br>Health utilization Cost data     |                                                                                                                                                                                                                                      |
| 8  | Edelman 2015 |  | Self-efficacy- but no report in Results section<br>Health literacy- but no report in Results section.                                                                                                                                                                                                                     | Medication adherence (via self report) - but no report in Results section.                                                           | No significant differences weight or physical activity. | 45.2% of intervention group had GP management plan for diabetes V's 35.5% of controls (non-significant)     |                                                                                                                                                                                                                                      |
| 9  | Farmer       |  | Functional status as per SF 12<br><br>Physical and SF 12 Mental Diabetes treatment satisfaction and satisfaction with nurse<br><br><u>SF 12 Physical</u><br>46.3 (9.0) V's 44.6 (11.1)<br><br>MD -0.7 (CI -2.7, 1.4) p = 0.52<br><br><u>SF 12 Mental</u><br>49.5 (10.4) V's 52.6 (8.8)<br>MD -1.6 (CI -3.9, 0.6) p = 0.15 | MARS Self reported adherence (range 5-25) with a higher score indicating higher levels of adherence<br><br>Nonsignificant difference | BMI dietary nonsignificant difference.                  | % reporting hypoglycaemia nonsignificant difference<br><br>Treatment satisfaction nonsignificant difference | Primary outcome % days over a 12 week period on which the correct number of doses of main glucose lowering medication was taken each day as prescribed.<br><br>77.4% (26.3) & days taking correct dose V's 69% = 8.4% MD (P = 0.044) |
| 10 | Forjough     |  | Self care data not given                                                                                                                                                                                                                                                                                                  |                                                                                                                                      |                                                         |                                                                                                             |                                                                                                                                                                                                                                      |
| 11 | Frosch       |  | Diabetes knowledge: (23 point Diabetes knowledge test) - nonsignificant difference.<br><br>Self-care behaviours (SDSCA) - nonsignificant difference<br><br>Diabetes knowledge and behavioural outcomes by group over time: Exercise was                                                                                   |                                                                                                                                      |                                                         |                                                                                                             | Prescribed medications measured: taking most prescribed medications (P = .01; interaction, P = .41), and taking all prescribed medications (P .001; interaction, P=.75).<br><br>Nonsignificant difference.                           |

1  
2  
3  
4  
5  
6  
7  
8  
9  
10  
11  
12  
13  
14  
15  
16  
17  
18  
19  
20  
21  
22  
23  
24  
25  
26  
27  
28  
29  
30  
31  
32  
33  
34  
35  
36  
37  
38  
39  
40  
41  
42  
43  
44  
45  
46  
47  
48  
49

1  
2  
3  
4  
5  
6  
7  
8  
9  
10  
11  
12  
13  
14  
15  
16  
17  
18  
19  
20  
21  
22  
23  
24  
25  
26  
27  
28  
29  
30  
31  
32  
33  
34  
35  
36  
37  
38  
39  
40  
41  
42  
43  
44  
45  
46  
47  
48  
49

|    |           |  |                                                                                                                                                                                                                                                                                                                                         |                                                                                                                                                              |                                                                                                |                                                                                                            |                                                                                                                                       |
|----|-----------|--|-----------------------------------------------------------------------------------------------------------------------------------------------------------------------------------------------------------------------------------------------------------------------------------------------------------------------------------------|--------------------------------------------------------------------------------------------------------------------------------------------------------------|------------------------------------------------------------------------------------------------|------------------------------------------------------------------------------------------------------------|---------------------------------------------------------------------------------------------------------------------------------------|
|    |           |  | statistically significantly reduced                                                                                                                                                                                                                                                                                                     |                                                                                                                                                              |                                                                                                |                                                                                                            |                                                                                                                                       |
| 12 | Guerci    |  |                                                                                                                                                                                                                                                                                                                                         |                                                                                                                                                              |                                                                                                | Symptomatic hyoglycaemia<br>Any hypoglycaemia: 53 (10.4%) in SMBG and 25 (5.2%) in control p= 0.003        | Medications nonsignificant difference                                                                                                 |
| 13 | Heisler   |  | Diabetes social support score - nonsignificant difference<br><br>Diabetes distress Diabetes QoL -nonsignificant difference                                                                                                                                                                                                              | Medication adherence nonsignificant difference<br><br>Medication intensification: Significant increase in insulin and oral diabetic medication prescribing . | BMI nonsignificant difference                                                                  |                                                                                                            | Medication intensification: Significant increase in insulin and oral diabetic medication prescribing .                                |
| 14 | Jacobs    |  |                                                                                                                                                                                                                                                                                                                                         |                                                                                                                                                              | Weight and diet nonsignificant difference                                                      | Intervention group had more screening parameters performed (retinal screening, nephropathy and neuropathy) | Medication sse; intervention group had higher use of antiplatelet, diabetic and statin medications.                                   |
| 15 | Jameson   |  |                                                                                                                                                                                                                                                                                                                                         |                                                                                                                                                              |                                                                                                |                                                                                                            | Intervention group- 28.8% commenced basal bolus insulin V's 1 (2%) patient in the control group.                                      |
| 16 | Jovanovic |  |                                                                                                                                                                                                                                                                                                                                         |                                                                                                                                                              | HbA1c < 7%<br>35% V's 21% (but p = 0.105)                                                      |                                                                                                            | Medication usage Increase in oral agents in intervention group, without any increase in numbers on insulin. Control group- no change. |
| 17 | Keogh     |  | The intervention group reported better personal control, a better understanding of diabetes and an increased belief in treatment effectiveness. They also had fewer symptoms and lower levels of diabetes concern and distress. They also had better psychological well being, adherence to lifestyle factors, self efficacy and family |                                                                                                                                                              | Statistically more patients in intervention group achieved at least 1.0% improvement in HbA1c. |                                                                                                            |                                                                                                                                       |

|    |       |                                                                                                                                                                                   |                                                                                                                                                                                                                                                                                                                                                                                                                                                                                                                                |  |                                                                                                                                                                                                                                                               |  |  |
|----|-------|-----------------------------------------------------------------------------------------------------------------------------------------------------------------------------------|--------------------------------------------------------------------------------------------------------------------------------------------------------------------------------------------------------------------------------------------------------------------------------------------------------------------------------------------------------------------------------------------------------------------------------------------------------------------------------------------------------------------------------|--|---------------------------------------------------------------------------------------------------------------------------------------------------------------------------------------------------------------------------------------------------------------|--|--|
|    |       |                                                                                                                                                                                   | <p>support.</p> <p>Illness perceptions (Brief illness Perception Questionnaire)- statistically significant improvement</p> <p>Psychological wellbeing (12-item Well-Being questionnaire)- statistically significant improvement</p> <p>Diabetes self management (Summary of Diabetes Self-care Activities Questionnaire) Self Efficacy (UK version Diabetes Self-Efficacy Scale)- statistically significant improvement</p> <p>Family support (Diabetes Family Behaviour Checklist)- statistically significant improvement</p> |  |                                                                                                                                                                                                                                                               |  |  |
| 18 | Kim   | <p>Depression (Kim Depression Scale for Korean Americans) nonsignificant difference</p> <p>Quality of Life (Diabetes Quality of Life Measure (DQOL) nonsignificant difference</p> | <p>Diabetes knowledge test (DKT) statistically significant difference</p> <p>Self efficacy (Stanford Chronic Disease Self-Efficacy scale) statistically significant difference</p> <p>Self care (Diabetes self care activitiis (SDSCA) statistically significant difference</p>                                                                                                                                                                                                                                                |  | <p>% participants achieving HbA1c goals</p> <p>% participants achieving HbA1c goals &amp; achieving HbA1c less 6.5, 7 and 7.5 greater in intervention group (Fig 3). statistically significant. But data not shown.</p> <p>BMI- nonsignificant difference</p> |  |  |
| 19 | Krein |                                                                                                                                                                                   | General satisfaction score and                                                                                                                                                                                                                                                                                                                                                                                                                                                                                                 |  | BMI nonsignificant                                                                                                                                                                                                                                            |  |  |

1  
2  
3  
4  
5  
6  
7  
8  
9  
10  
11  
12  
13  
14  
15  
16  
17  
18  
19  
20  
21  
22  
23  
24  
25  
26  
27  
28  
29  
30  
31  
32  
33  
34  
35  
36  
37  
38  
39  
40  
41  
42  
43  
44  
45  
46  
47  
48  
49

1  
2  
3  
4  
5  
6  
7  
8  
9  
10  
11  
12  
13  
14  
15  
16  
17  
18  
19  
20  
21  
22  
23  
24  
25  
26  
27  
28  
29  
30  
31  
32  
33  
34  
35  
36  
37  
38  
39  
40  
41  
42  
43  
44  
45  
46  
47  
48  
49

|    |         |  |                                                                                                                                                                                                                                                                                                                                                                                                                                                                                                                                                  |  |                               |                                                                                                                                                                                           |                                                                                   |
|----|---------|--|--------------------------------------------------------------------------------------------------------------------------------------------------------------------------------------------------------------------------------------------------------------------------------------------------------------------------------------------------------------------------------------------------------------------------------------------------------------------------------------------------------------------------------------------------|--|-------------------------------|-------------------------------------------------------------------------------------------------------------------------------------------------------------------------------------------|-----------------------------------------------------------------------------------|
|    |         |  | rating of diabetes provider score was marginally better and statistically better in the intervention group.                                                                                                                                                                                                                                                                                                                                                                                                                                      |  | difference                    |                                                                                                                                                                                           |                                                                                   |
| 20 | Long    |  |                                                                                                                                                                                                                                                                                                                                                                                                                                                                                                                                                  |  | BMI nonsignificant difference | Uptake of intervention<br><br>Peer mentoring: Aiming to have 4 calls per month for 6 months. The Results showed 38% mentors talked 4 times per month and by Month 6, that reduced to 16%. | No difference in hypoglycaemia                                                    |
| 21 | Maisios |  |                                                                                                                                                                                                                                                                                                                                                                                                                                                                                                                                                  |  |                               | Adherence to follow up: 41/48 and 23/34 patients returned for follow up. 29% intervention group non-compliant.                                                                            | Use of insulin nonsignificant difference<br>INT: 25% to 40%<br>CONTROL: 15 to 17% |
| 22 | Mathers |  | Decisional conflict:<br><br>Mean difference between intervention and control groups on the total score for decisional conflict on the total score was -7.72 (CI -12.5, -2.97)<br><br>Realistic expectations: Were better in intervention group<br><br>Preferred option: - Proportion undecided: No significant difference<br><br>Participation in decision-making: Statistically significant difference, intervention group had higher participation rates.<br><br>Regret score. No significant difference.<br><br>Acceptability: Most found PDA |  |                               |                                                                                                                                                                                           |                                                                                   |

|    |           |                                                                                              |                                                                                                                                                                                                    |                                                                                                                                                                                                                                                                                                                                     |                                                                                              |                                                                                                                                                                   |                                                                                |
|----|-----------|----------------------------------------------------------------------------------------------|----------------------------------------------------------------------------------------------------------------------------------------------------------------------------------------------------|-------------------------------------------------------------------------------------------------------------------------------------------------------------------------------------------------------------------------------------------------------------------------------------------------------------------------------------|----------------------------------------------------------------------------------------------|-------------------------------------------------------------------------------------------------------------------------------------------------------------------|--------------------------------------------------------------------------------|
|    |           |                                                                                              | useful.                                                                                                                                                                                            |                                                                                                                                                                                                                                                                                                                                     |                                                                                              |                                                                                                                                                                   |                                                                                |
| 23 | McDermott |                                                                                              | <p>Test of Functional Health Literacy for Adults (TOFHLA)- unclear if significant result present</p> <p>Assessment of Quality of Life (AQoL) instrument- unclear if significant result present</p> | <p>Waitlist patients had better self-report adherence</p> <p>Adherence: SS reduction</p>                                                                                                                                                                                                                                            | <p>Slight non-significant reductions in rest of other physical outcomes (BMI, ACR, eGFR)</p> | <p>Intervention group patients statistically significantly more likely to have seen a dietician and dentist, be taking inulin and have influenza vaccination.</p> |                                                                                |
| 24 | McMahon   |                                                                                              |                                                                                                                                                                                                    |                                                                                                                                                                                                                                                                                                                                     |                                                                                              | <p>Frequency of data uploads on web-based care management system (used to look at effect on HbA1c primary outcome)</p>                                            |                                                                                |
| 25 | Mons      | <p>Symptoms of depression: Geriatric depression scale GDS: No difference between groups.</p> | <p>Health related quality of life (Short Form General Health Survey: SF-12)</p> <p>No difference <u>between</u> groups at 12 months.</p> <p>Statistically significant change at 18 months.</p>     |                                                                                                                                                                                                                                                                                                                                     |                                                                                              |                                                                                                                                                                   |                                                                                |
| 26 | O'Connor  |                                                                                              |                                                                                                                                                                                                    | <p>No significant difference between groups regarding medication adherence (one prescription fill within 60 days of prescription date)- 88% in intervention group vs 86% in control group.</p> <p>Similarly there was no significant difference between groups regarding medication persistence (two or more prescription fills</p> |                                                                                              |                                                                                                                                                                   | <p>Medication persistence (two or more prescription fills within 180 days)</p> |

1  
2  
3  
4  
5  
6  
7  
8  
9  
10  
11  
12  
13  
14  
15  
16  
17  
18  
19  
20  
21  
22  
23  
24  
25  
26  
27  
28  
29  
30  
31  
32  
33  
34  
35  
36  
37  
38  
39  
40  
41  
42  
43  
44  
45  
46  
47  
48  
49

1  
2  
3  
4  
5  
6  
7  
8  
9  
10  
11  
12  
13  
14  
15  
16  
17  
18  
19  
20  
21  
22  
23  
24  
25  
26  
27  
28  
29  
30  
31  
32  
33  
34  
35  
36  
37  
38  
39  
40  
41  
42  
43  
44  
45  
46  
47  
48  
49

|    |                  |                                                                                                                       |                                                                                                                      |                                            |                |                                                                                                                                                                                                                                                                                                                                                                                                                                                                                                                                               |                                                                                |
|----|------------------|-----------------------------------------------------------------------------------------------------------------------|----------------------------------------------------------------------------------------------------------------------|--------------------------------------------|----------------|-----------------------------------------------------------------------------------------------------------------------------------------------------------------------------------------------------------------------------------------------------------------------------------------------------------------------------------------------------------------------------------------------------------------------------------------------------------------------------------------------------------------------------------------------|--------------------------------------------------------------------------------|
|    |                  |                                                                                                                       |                                                                                                                      | within 180 days)                           |                |                                                                                                                                                                                                                                                                                                                                                                                                                                                                                                                                               |                                                                                |
| 27 | Odegard          |                                                                                                                       |                                                                                                                      | No improvement on self reported adherence. |                |                                                                                                                                                                                                                                                                                                                                                                                                                                                                                                                                               | No significant difference in MAI (medication appropriateness) at end of study. |
| 28 | Palmas           |                                                                                                                       |                                                                                                                      |                                            |                |                                                                                                                                                                                                                                                                                                                                                                                                                                                                                                                                               |                                                                                |
| 29 | Phillis-Tsimikas | Self management behaviours and Depression (in separate publication) - not published at time of search so not included | Self management behaviours and Depression (in separate publication)- not published at time of search so not included |                                            |                |                                                                                                                                                                                                                                                                                                                                                                                                                                                                                                                                               |                                                                                |
| 30 | Polonsky         |                                                                                                                       | GWB WHO-5 - nonsignificant difference                                                                                |                                            |                | <p>Treatment intensification</p> <p>Changes in treatment: 75.5% of STG patients received a medication change at month 1 V's 28% of ACG patients (p &lt;0.0001).</p> <p>Twice as many STB patients started on insulin between month 1 and 12. Heightened attention paid to subjects.</p> <p>Free meters: Requirement to bring meters to all study visits</p> <p>More frequent study visits<br/>STG physicians trained on a treatment algorithm<br/>SMBG: Lower test use in STG group (0.77) V's ACG group 1.05 (nonsignificant difference)</p> |                                                                                |
| 31 | Quinn            | PHQ-9 depression -                                                                                                    | Diabetes distress scale -                                                                                            |                                            | BMI unclear if | Hypoglycaemic events and                                                                                                                                                                                                                                                                                                                                                                                                                                                                                                                      |                                                                                |

|    |             |                           |                                                                                                                                                                                                                                                                                                                                                                                                                                                                                                                                    |  |                           |                                                                                                                                                                                                                                                                                                                         |  |
|----|-------------|---------------------------|------------------------------------------------------------------------------------------------------------------------------------------------------------------------------------------------------------------------------------------------------------------------------------------------------------------------------------------------------------------------------------------------------------------------------------------------------------------------------------------------------------------------------------|--|---------------------------|-------------------------------------------------------------------------------------------------------------------------------------------------------------------------------------------------------------------------------------------------------------------------------------------------------------------------|--|
|    |             | nonsignificant difference | nonsignificant difference<br>Diabetes diabetes inventory - nonsignificant difference                                                                                                                                                                                                                                                                                                                                                                                                                                               |  | statistically significant | hospitalizations were infrequent in all groups.                                                                                                                                                                                                                                                                         |  |
| 32 | Rothman     |                           | Diabetes knowledge Satisfaction:<br><br>(Diabetes Treatment Satisfaction Questionnaire)<br>MD in scores (INT V's control)<br><br>Diabetes knowledge: +14 (CI 9 to 20)<br><br>Diabetes treatment satisfaction +3 (CI 1 to 6) statistically significant reduction                                                                                                                                                                                                                                                                    |  |                           | Process measures (time spent with patients) and medication changes. But did not factor in any changes made by PCP. Aspirin use higher in intervention group at 12 months. Statin use equal. No statistically significant increase in services in intervention group.                                                    |  |
| 33 | Schillinger |                           | SF-12 instrument for QoL nonsignificant difference<br><br>Patient assessment of chronic illness care (PACIC) score out of 100<br>Statistically significant difference ATSM +12.2 V's control GVC +12.6 V's control Data present<br><br>Diabetes Quality Improvement Program (100 score)<br><br>Self management behavior statistically significant difference ATSM +0.6 V's control GVC +0.3 V's control Data present<br><br>Diabetes self efficacy statistically significant difference ATSM +6.0 V's control GVC +5.5 V's control |  |                           | Functional outcomes:<br>Bed days: ATSM significant reduction<br><br>Restricted activity, ATSM significant improvement<br><br><u>Interpersonal Processes of Care</u> for Diverse Populations (IPC) instrument to capture reports of provider's communication. Statistically significant difference ATSM +9.0 V's control |  |

1  
2  
3  
4  
5  
6  
7  
8  
9  
10  
11  
12  
13  
14  
15  
16  
17  
18  
19  
20  
21  
22  
23  
24  
25  
26  
27  
28  
29  
30  
31  
32  
33  
34  
35  
36  
37  
38  
39  
40  
41  
42  
43  
44  
45  
46  
47  
48  
49

1  
2  
3  
4  
5  
6  
7  
8  
9  
10  
11  
12  
13  
14  
15  
16  
17  
18  
19  
20  
21  
22  
23  
24  
25  
26  
27  
28  
29  
30  
31  
32  
33  
34  
35  
36  
37  
38  
39  
40  
41  
42  
43  
44  
45  
46  
47  
48  
49

|    |          |                                                                                                                                                               |                                                                                                 |  |                    |                                                                                                                                                                                                                                                                                                                                                                                                                                                                                                                              |                             |
|----|----------|---------------------------------------------------------------------------------------------------------------------------------------------------------------|-------------------------------------------------------------------------------------------------|--|--------------------|------------------------------------------------------------------------------------------------------------------------------------------------------------------------------------------------------------------------------------------------------------------------------------------------------------------------------------------------------------------------------------------------------------------------------------------------------------------------------------------------------------------------------|-----------------------------|
|    |          |                                                                                                                                                               | Data present                                                                                    |  |                    |                                                                                                                                                                                                                                                                                                                                                                                                                                                                                                                              |                             |
| 34 | Sen      |                                                                                                                                                               |                                                                                                 |  |                    | <p>Primary outcome was adherence to biometric tests:</p> <p>At three months; total adherence rates were 81% in the low incentive arm V's 58% in control (p 0.007) and 77% in high incentive arm V's 58% (p0.02).</p> <p>No difference between the incentive arms.</p> <p>But no difference in the high incentive group V's control at month 6 (at 3 month post intervention follow up)..</p> <p>But the low incentive group still had significant improvement in adherence at month 6 Vs control (62% V's 27%, p 0.002).</p> |                             |
| 35 | Sugiyama | Change Mental Component Summary Score (MCS-12) from the SF-12: A mean difference of +1.6 between intervention and control which was statistically significant | Secondary outcomes: Social support score from the Diabetes Care Profile: non-significant change |  |                    |                                                                                                                                                                                                                                                                                                                                                                                                                                                                                                                              |                             |
| 36 | Tang     |                                                                                                                                                               | Satisfaction/ Psychosocial                                                                      |  | BMI nonsignificant | Healthcare utilisation -                                                                                                                                                                                                                                                                                                                                                                                                                                                                                                     | Significant increase in new |



|    |        |  |                                                                                                                                                                                                    |  |                                                   |                                                                                               |                                                                                                                                                                                          |
|----|--------|--|----------------------------------------------------------------------------------------------------------------------------------------------------------------------------------------------------|--|---------------------------------------------------|-----------------------------------------------------------------------------------------------|------------------------------------------------------------------------------------------------------------------------------------------------------------------------------------------|
|    |        |  | wellbeing<br>Intervention group had higher treatment satisfaction (statistically significant) and lower treatment distress scores. Other scales of diabetes distress had no change between groups. |  | difference                                        | nonsignificant difference in total physician visits.                                          | medications started and insulin commencement in intervention group. Patients already on insulin- the intervention group had a statistically significant higher number of dose increases. |
| 37 | Taylor |  | Psychosocial (SF 26 for QoL and Duke Activity Status):<br><br>Nonsignificant difference in psychological variables Patient and physician satisfaction<br>nonsignificant difference                 |  |                                                   | Medical utilization (physician visits)<br>nonsignificant difference in physician or ED visits |                                                                                                                                                                                          |
| 38 | Thom   |  |                                                                                                                                                                                                    |  | 10-year framingham risk nonsignificant difference |                                                                                               |                                                                                                                                                                                          |

1  
2  
3  
4  
5  
6  
7  
8  
9  
10  
11  
12  
13  
14  
15  
16  
17  
18  
19  
20  
21  
22  
23  
24  
25  
26  
27  
28  
29  
30  
31  
32  
33  
34  
35  
36  
37  
38  
39  
40  
41  
42  
43  
44  
45  
46  
47  
48  
49

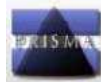

# PRISMA 2009 Checklist

1  
2  
3  
4  
5  
6  
7  
8  
9  
10  
11  
12  
13  
14  
15  
16  
17  
18  
19  
20  
21  
22  
23  
24  
25  
26  
27  
28  
29  
30  
31  
32  
33  
34  
35  
36  
37  
38  
39  
40  
41  
42  
43  
44  
45  
46  
47  
48  
49

| Section/topic                      | #  | Checklist item                                                                                                                                                                                                                                                                                              | Reported on page # |
|------------------------------------|----|-------------------------------------------------------------------------------------------------------------------------------------------------------------------------------------------------------------------------------------------------------------------------------------------------------------|--------------------|
| <b>TITLE</b>                       |    |                                                                                                                                                                                                                                                                                                             |                    |
| Title                              | 1  | Identify the report as a systematic review, meta-analysis, or both.                                                                                                                                                                                                                                         | 1                  |
| <b>ABSTRACT</b>                    |    |                                                                                                                                                                                                                                                                                                             |                    |
| Structured summary                 | 2  | Provide a structured summary including, as applicable: background; objectives; data sources; study eligibility criteria, participants, and interventions; study appraisal and synthesis methods; results; limitations; conclusions and implications of key findings; systematic review registration number. | 3                  |
| <b>INTRODUCTION</b>                |    |                                                                                                                                                                                                                                                                                                             |                    |
| Rationale                          | 3  | Describe the rationale for the review in the context of what is already known.                                                                                                                                                                                                                              | 6                  |
| Objectives                         | 4  | Provide an explicit statement of questions being addressed with reference to participants, interventions, comparisons, outcomes, and study design (PICOS).                                                                                                                                                  | 7                  |
| <b>METHODS</b>                     |    |                                                                                                                                                                                                                                                                                                             |                    |
| Protocol and registration          | 5  | Indicate if a review protocol exists, if and where it can be accessed (e.g., Web address), and, if available, provide registration information including registration number.                                                                                                                               | 8                  |
| Eligibility criteria               | 6  | Specify study characteristics (e.g., PICOS, length of follow-up) and report characteristics (e.g., years considered, language, publication status) used as criteria for eligibility, giving rationale.                                                                                                      | 8, 9               |
| Information sources                | 7  | Describe all information sources (e.g., databases with dates of coverage, contact with study authors to identify additional studies) in the search and date last searched.                                                                                                                                  | 8                  |
| Search                             | 8  | Present full electronic search strategy for at least one database, including any limits used, such that it could be repeated.                                                                                                                                                                               | 8                  |
| Study selection                    | 9  | State the process for selecting studies (i.e., screening, eligibility, included in systematic review, and, if applicable, included in the meta-analysis).                                                                                                                                                   | 8                  |
| Data collection process            | 10 | Describe method of data extraction from reports (e.g., piloted forms, independently, in duplicate) and any processes for obtaining and confirming data from investigators.                                                                                                                                  | 9, 10              |
| Data items                         | 11 | List and define all variables for which data were sought (e.g., PICOS, funding sources) and any assumptions and simplifications made.                                                                                                                                                                       | 9, 10              |
| Risk of bias in individual studies | 12 | Describe methods used for assessing risk of bias of individual studies (including specification of whether this was done at the study or outcome level), and how this information is to be used in any data synthesis.                                                                                      | 10                 |
| Summary measures                   | 13 | State the principal summary measures (e.g., risk ratio, difference in means).                                                                                                                                                                                                                               | 10, 11             |
| Synthesis of results               | 14 | Describe the methods of handling data and combining results of studies, if done, including measures of consistency (e.g., $I^2$ for each meta-analysis).                                                                                                                                                    | 10, 11             |

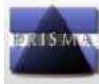

# PRISMA 2009 Checklist

Page 1 of 2

| Section/topic                 | #  | Checklist item                                                                                                                                                                                           | Reported on page # |
|-------------------------------|----|----------------------------------------------------------------------------------------------------------------------------------------------------------------------------------------------------------|--------------------|
| Risk of bias across studies   | 15 | Specify any assessment of risk of bias that may affect the cumulative evidence (e.g., publication bias, selective reporting within studies).                                                             | 10                 |
| Additional analyses           | 16 | Describe methods of additional analyses (e.g., sensitivity or subgroup analyses, meta-regression), if done, indicating which were pre-specified.                                                         | 10, 11             |
| <b>RESULTS</b>                |    |                                                                                                                                                                                                          |                    |
| Study selection               | 17 | Give numbers of studies screened, assessed for eligibility, and included in the review, with reasons for exclusions at each stage, ideally with a flow diagram.                                          | 12                 |
| Study characteristics         | 18 | For each study, present characteristics for which data were extracted (e.g., study size, PICOS, follow-up period) and provide the citations.                                                             | 12, 13             |
| Risk of bias within studies   | 19 | Present data on risk of bias of each study and, if available, any outcome level assessment (see item 12).                                                                                                | 13                 |
| Results of individual studies | 20 | For all outcomes considered (benefits or harms), present, for each study: (a) simple summary data for each intervention group (b) effect estimates and confidence intervals, ideally with a forest plot. | 13, 14, 15         |
| Synthesis of results          | 21 | Present results of each meta-analysis done, including confidence intervals and measures of consistency.                                                                                                  | 13, 14, 15         |
| Risk of bias across studies   | 22 | Present results of any assessment of risk of bias across studies (see Item 15).                                                                                                                          | 13                 |
| Additional analysis           | 23 | Give results of additional analyses, if done (e.g., sensitivity or subgroup analyses, meta-regression [see Item 16]).                                                                                    | 15                 |
| <b>DISCUSSION</b>             |    |                                                                                                                                                                                                          |                    |
| Summary of evidence           | 24 | Summarize the main findings including the strength of evidence for each main outcome; consider their relevance to key groups (e.g., healthcare providers, users, and policy makers).                     | 16                 |
| Limitations                   | 25 | Discuss limitations at study and outcome level (e.g., risk of bias), and at review-level (e.g., incomplete retrieval of identified research, reporting bias).                                            | 16, 17             |
| Conclusions                   | 26 | Provide a general interpretation of the results in the context of other evidence, and implications for future research.                                                                                  | 19                 |
| <b>FUNDING</b>                |    |                                                                                                                                                                                                          |                    |
| Funding                       | 27 | Describe sources of funding for the systematic review and other support (e.g., supply of data); role of funders for the systematic review.                                                               | 4                  |

From: Moher D, Liberati A, Tetzlaff J, Altman DG, The PRISMA Group (2009). Preferred Reporting Items for Systematic Reviews and Meta-Analyses: The PRISMA Statement. PLoS Med 6(6): e1000097. doi:10.1371/journal.pmed1000097

For more information, visit: [www.prisma-statement.org](http://www.prisma-statement.org).  
 For peer review only - <http://bmjopen.bmj.com/site/about/guidelines.xhtml>  
 Page 2 of 2

# BMJ Open

## Improving risk factor management for patients with poorly controlled type 2 diabetes: A systematic review of healthcare interventions in primary care and community settings

|                                 |                                                                                                                                                                                                                                                                                                                                                                                                                                                                                                                              |
|---------------------------------|------------------------------------------------------------------------------------------------------------------------------------------------------------------------------------------------------------------------------------------------------------------------------------------------------------------------------------------------------------------------------------------------------------------------------------------------------------------------------------------------------------------------------|
| Journal:                        | <i>BMJ Open</i>                                                                                                                                                                                                                                                                                                                                                                                                                                                                                                              |
| Manuscript ID                   | bmjopen-2016-015135.R1                                                                                                                                                                                                                                                                                                                                                                                                                                                                                                       |
| Article Type:                   | Research                                                                                                                                                                                                                                                                                                                                                                                                                                                                                                                     |
| Date Submitted by the Author:   | 19-Apr-2017                                                                                                                                                                                                                                                                                                                                                                                                                                                                                                                  |
| Complete List of Authors:       | Murphy, Mark; HRB Centre for Primary Care Research, Department of General Practice<br>Byrne, Molly; University of Galway, Ireland, School of Psychology<br>Galvin, Rose; University of Limerick, Department of Clinical Therapies<br>Boland, Fiona; Royal College of Surgeons Ireland, 123 St Stephens Green, HRB Centre For Primary Care Research, Division of Population Health Sciences (PHS)<br>Fahey, Tom; Royal College of Surgeons in Ireland, Department of General Practice<br>Smith, Susan; RCSI, General Practice |
| <b>Primary Subject Heading</b>: | Diabetes and endocrinology                                                                                                                                                                                                                                                                                                                                                                                                                                                                                                   |
| Secondary Subject Heading:      | General practice / Family practice, Epidemiology, Health services research                                                                                                                                                                                                                                                                                                                                                                                                                                                   |
| Keywords:                       | DIABETES & ENDOCRINOLOGY, EPIDEMIOLOGY, GENERAL MEDICINE (see Internal Medicine), HEALTH SERVICES ADMINISTRATION & MANAGEMENT                                                                                                                                                                                                                                                                                                                                                                                                |
|                                 |                                                                                                                                                                                                                                                                                                                                                                                                                                                                                                                              |

SCHOLARONE™  
Manuscripts

**Title**

Improving risk factor management for patients with poorly controlled type 2 diabetes: A systematic review of healthcare interventions in primary care and community settings

**Corresponding author**

Dr. Mark E Murphy, MB BCh BAO BMedSci MRCP MICGP

HRB Centre for Primary Care Research,

Department of General Practice,

Royal College of Surgeons, Ireland,

Dublin 2,

Ireland.

Telephone: 01 4028504

Email: [markmurphy@rcsi.ie](mailto:markmurphy@rcsi.ie)

**Co-authors**

Dr. Molly Byrne, BA MSc PhD <sup>2</sup>

Dr. Rose Galvin, PhD BScPhysio DipStats MISC <sup>3</sup>

Dr. Fiona Boland, MSc PhD <sup>1</sup>

Professor Tom Fahey, MSc MD DCH DObs MEd Cert MFPH FRCGP <sup>1</sup>

Professor Susan M Smith, MD MSc MB BCh BAO DCH MRCPI MRCGP <sup>1</sup>

**Co-authors institutions**

1/ HRB Centre for Primary Care Research, Royal College of Surgeons, Ireland

2/ Department of Physiotherapy, University of Limerick, Ireland

3/ Health Behaviour Change Research Group, School of Psychology, National University of Ireland, Galway, Ireland.

**Word Count: 3976**

For peer review only

**Abstract**

Objectives: Poorly-controlled type 2 diabetes mellitus (T2DM) is a major international health problem. Our aim was to assess the effectiveness of healthcare interventions, specifically targeting patients with poorly-controlled T2DM, which seek to improve glycaemic control and cardiovascular risk in primary care settings.

Design: Systematic review.

Setting: Primary care and community settings.

Included studies: Randomised controlled trials (RCTs) targeting patients with poor glycaemic control were identified from Pubmed, Embase, Web of Science, Cochrane Library and SCOPUS. Poor glycaemic control was defined as HbA1c over 68mmol/mol (7.5%).

Interventions: Interventions were classified as organisational, patient-oriented, professional, financial or regulatory.

Outcomes: Primary outcomes were HbA1c, blood pressure and lipid control. Two reviewers independently assessed studies for eligibility, extracted data, and assessed study quality. Meta-analyses were undertaken where appropriate using random-effects models. Subgroup analysis explored the effects of intervention type, baseline HbA1c, study quality and study duration. Meta-regression analyses were undertaken to investigate identified heterogeneity.

Results: Forty-two RCTs were identified, including 11,250 patients with most undertaken in the USA. In general studies had low risk of bias. The main intervention-types were patient-directed (48%) and organisational (48%). Overall, interventions reduced HbA1c by -0.34% (95% CI; -0.46%, -0.22%), but meta-analyses had high statistical heterogeneity. Subgroup analyses suggested that organisational interventions and interventions on those with baseline HbA1c over 9.5% had better improvements in HbA1c. Meta-regression analyses suggested that only interventions on those with population HbA1c over 9.5% were more effective. Interventions had a modest improvement of blood pressure and lipids, although baseline levels of

control were generally good.

Conclusions: This review suggests that interventions for T2DM, in primary care, are better targeted at individuals with very poor glycaemic control and that organisational interventions may be more effective.

#### Article summary:

##### 'Strengths and limitations of the study'

- This systematic review adds to the evidence regarding the effectiveness of healthcare interventions, which specifically target patients with poor glycaemic control of Type 2 Diabetes Mellitus, in community settings.
- There is no specific definition for 'poor control' diabetes in the literature, but by including all studies that had patients with a HbA1c > 59 mmol/mol (7.5%), we captured the full range of poor glycaemic control and also examined other key risk factors such as blood pressure and lipids.
- Data were pooled from 42 studies across four continents, enhancing the generalisability of the findings.
- We did not account for medication use in the studies, but given that all included studies were RCTs, which would balance out delivery of medications, we think that differences in underlying medication usage may relate to how different interventions promote intensification of medications.
- An individual patient data meta-analysis may answer further questions not possible in this review.

#### Funding statement:

This work was supported by the HRB Centre for Primary Care Research (Research Grant: HRC-2014-1), a publicly funded body. Four of the six study authors are employed by this agency.

#### Competing interests statement:



1  
2  
3 Nil  
4  
5  
6  
7

8 **Author's contributions:**  
9

10 All authors contributed to the drafting of the paper. MEM, MB and RG  
11 independently assessed studies for eligibility, extracted data, and assessed study  
12 quality. Decisions or disagreements were brought to SMS. SMS, TF and FB provided  
13 methodological and statistical support to the paper. All authors contributed to the  
14 writing of the paper.  
15  
16  
17  
18  
19  
20  
21  
22  
23  
24  
25  
26  
27  
28  
29  
30  
31  
32  
33  
34  
35  
36  
37  
38  
39  
40  
41  
42  
43  
44  
45  
46  
47  
48  
49  
50  
51  
52  
53  
54  
55  
56  
57  
58  
59  
60

## Main text

### Introduction

Worldwide, type 2 diabetes mellitus (T2DM) is rising in prevalence and will exceed 4.4% of the world's population, or 366 million by 2030 (1). Despite a wealth of evidence regarding the importance of risk factor control in T2DM, many patients continue to have poor control of HbA1c, blood pressure and lipids. Up to 60% of patients fail to meet target HbA1c levels (2). Similarly over one third of patients with T2DM have inadequate blood pressure control (3). Poorly-controlled T2DM - and its associated microvascular and macrovascular complications - is associated with higher morbidity, higher mortality, poorer quality of life and substantial economic burden (4).

Several studies have examined interventions designed to support the delivery of diabetes care in the community to improve glycaemic and cardiovascular risk factor control (5-11). A 2011 review of community-based interventions including all patients with T2DM, comprising sixty-eight studies, showed that only one third had a statistically significant improvement in one of the relevant clinical outcomes for diabetes: HbA1c, blood pressure or lipids (8). The majority of included studies targeted all patients with T2DM without focussing on those with poor control. Although no overall effect was noted, combining organisational with professional (multifaceted) interventions was concluded to be more beneficial than single interventions and the highest quality multifaceted randomised controlled trials (RCTs) tended to include decision support interventions and elements. A 2013 review looked at 48 cluster RCTs, assessing the effectiveness of Quality Improvement (QI) strategies on the management of diabetes (both type 1 and 2) (11). It suggested that QI interventions, which intervened at a system level on diabetes management, were associated with the largest benefits in glycaemic control and that the effectiveness of interventions targeting healthcare practitioners varied with baseline glycaemic control; being more effective with patients with worse control (11). A 2016 review, of type 1 or type 2 diabetes in primary care, looked at the effects of Clinician Education, Clinician Reminders, Team Changes, Case Management,

1  
2  
3 Electronic Patient Registry, Telemedicine and Audit and Feedback (10). Including  
4 thirty studies, it concluded that multifaceted interventions on multidisciplinary  
5 teams were most effective. Interventions targeting family physicians were only  
6 effective if computerised feedback on insulin prescribing was provided.  
7  
8  
9

10  
11  
12 Four large RCTs from North America and the UK have investigated the effects of  
13 intensive management of hyperglycaemic and cardiac risk factors on mortality in  
14 T2DM across all settings (12-17). Uncertainty remains regarding intensive glycaemic  
15 management for all patients with T2DM, with concerns about aggressive reductions  
16 in HbA1c (18). Targeted reductions in cardiovascular and glycaemic risk factors in  
17 certain vulnerable populations (cognitively impaired, disabled and frail) have been  
18 advocated (19). Interventions that specifically target those with very poor control of  
19 risk factors may be more beneficial than those targeting all patients, achieving the  
20 benefits of cardiovascular and glycaemic control, but without the potential risks of  
21 intensively lowering HbA1c in all persons with T2DM. The effect of interventions  
22 specifically targeting patients with poorly controlled T2DM in primary care is  
23 unknown.  
24  
25  
26  
27  
28  
29  
30  
31  
32  
33

34  
35 Our aim was to assess the effectiveness of healthcare interventions delivered in  
36 primary care and community settings, targeting poorly-controlled T2DM, which seek  
37 to improve glycaemic control, blood pressure and lipids.  
38  
39  
40  
41  
42  
43  
44  
45  
46  
47  
48  
49  
50  
51  
52  
53  
54  
55  
56  
57  
58  
59  
60

## Methods

The Preferred Reporting Items for Systematic Reviews and Meta-Analyses (PRISMA) guidelines were used to standardise the conduct and reporting of the research and the protocol was registered on PROSPERO (20).

### *Data Sources and Searches*

We searched articles in all languages from the Cochrane Library, Pubmed, Embase, Web of Science and SCOPUS from 1990 to 31st December 2016. Reference lists of all included papers were searched. Secondary searching of all references from included studies was also conducted. *Appendix 1* outlines the search string.

### *Study Selection*

We considered RCTs, controlled clinical trials (CCTs), controlled before and after studies (CBAs) and interrupted time series analyses (ITS) meeting the Cochrane Effective Practice and Organisation of Care (EPOC) quality criteria (21). Studies published in all languages were eligible.

### Population:

Individuals with 'poorly controlled' T2DM were our population of interest. Though there is a broad consensus about the importance of achieving good glycaemic control for the reasons described, there are no validated cut-offs, which define 'poor-control' of T2DM for targeted interventions. Poorly controlled T2DM has been defined based upon elevated glycated haemoglobin levels in the literature, with different thresholds of HbA1c described, from over 59 mmol/mol (7.5%), over 64 mmol/mol (8.0%) to over 75 mmol/mol (9.0%) (22-24). In this review, we considered participants to have poorly controlled T2DM if their HbA1c was over 59 mmol/mol (7.5%) (or if over 80% of the population in a study had a HbA1c over 59 mmol/mol). Similarly there is no defined cut off as to what defines 'poorly-controlled' blood pressure. We identified studies primarily based on poor glycaemic control but also included participants in these studies who had uncontrolled hypertension or elevated cholesterol/ lipids, if the risk factor level was above that of an accepted

1  
2  
3 international target, as designated by the study authors. Where studies included  
4 patients with 'poor control' based upon a range of risk factor profiles, for  
5 consistency, we only included a study if 80% of the population had a HbA1c over 59  
6 mmol/mol (7.5%).  
7  
8  
9

#### 10 11 Interventions:

12  
13 We included interventions delivered by healthcare professionals (HCPs) specifically  
14 aiming to target patients with poor control of T2DM, based in primary care or  
15 community settings. The primary healthcare setting was defined as providing  
16 "integrated, easy to access, health care services by clinicians who are accountable  
17 for addressing a large majority of personal health care needs, developing a sustained  
18 and continuous relationship with patients, and practicing in the context of family and  
19 community" (25). We excluded drug trials though interventions could have involved  
20 treatment intensification. Interventions were defined as simple if they had one  
21 identifiable component and multifaceted if they had more than one element. We  
22 excluded trials performed within the hospital or the hospital-outpatient setting. The  
23 Cochrane EPOC taxonomy of interventions was utilised and the predominant  
24 intervention type was defined using five categories including organisational, patient-  
25 centred, regulatory, financial and professional. Examples of these intervention types  
26 are provided in *Appendix 2* (21):  
27  
28  
29  
30  
31  
32  
33  
34  
35  
36  
37  
38

#### 39 Comparison:

40 Comparison groups were included if they received usual care in that setting for  
41 T2DM. Controls were also included if they received minor enhanced elements of  
42 care, such as education leaflets, which the study authors believed did not go beyond  
43 usual care in most settings.  
44  
45  
46  
47  
48

#### 49 Outcome measures:

50 Primary outcomes included glycaemic control (HbA1c), blood pressure (systolic or  
51 diastolic) and lipid levels, but if studies did not include HbA1c they were excluded.  
52 Secondary outcomes included patient reported outcome measures (PROMs) (for  
53 example health related quality of life), utilisation of health services, behavioural  
54  
55  
56  
57  
58  
59  
60

1  
2  
3 outcomes such as medication adherence, provider behaviour, acceptability of service  
4 to patients and providers, economic outcomes and adverse events.  
5  
6

#### 7 *Data Extraction and Quality Assessment*

8  
9  
10 Two reviewers (MEM and RG) read the titles and/ or abstracts of the identified  
11 references and eliminated irrelevant studies. Studies that were deemed eligible for  
12 inclusion were read in full and their suitability for inclusion in the systematic review  
13 was independently determined by two reviewers. Disagreements were managed by  
14 a third, independent reviewer (SMS). The following information was extracted: a)  
15 Details of intervention, b) Participants, c) Clinical setting, d) Study design, e)  
16 Outcomes, f) Author Information. We contacted authors for missing data.  
17  
18  
19  
20  
21  
22

23 Risk of bias in articles was assessed using the Cochrane Handbook for systematic  
24 reviewing and EPOC criteria (26). Two review authors independently assessed the  
25 risk of bias of each included study against the criteria described in the Cochrane risk  
26 of bias tool. We explicitly judged each of these criteria using: low risk of bias, high  
27 risk of bias or unclear risk of bias (either lack of information or uncertainty over the  
28 potential for bias). We resolved disagreements by consensus and consulted a third  
29 review author to resolve disagreements if necessary. An overall assessment of a  
30 study's risk of bias was determined using EPOC guidance, with judgement and  
31 consensus reached between two reviewers (MEM and SMS) (26).  
32  
33  
34  
35  
36  
37  
38  
39

#### 40 *Data Analysis*

41  
42  
43 For continuous data we calculated the treatment effect using mean differences (MD)  
44 and 95% confidence intervals (CI). No binary outcomes were included. Revman  
45 software was used to perform the analysis, determine heterogeneity and produce  
46 forest plots to illustrate pooled estimates (21). Stata version 13 was used to  
47 investigate publication bias by creating funnel plots and using Egger's test to assess  
48 funnel plot asymmetry (27). A random-effects analysis was performed and  
49 heterogeneity across the studies was quantified using the  $I^2$  statistic. The  $I^2$  statistic  
50 describes the percentage of the variability in effect estimates which is due to  
51 heterogeneity rather than sampling error (chance) (28). If the  $I^2$  statistic was >50%, it  
52  
53  
54  
55  
56  
57  
58  
59  
60

1  
2  
3 was deemed that there was significant heterogeneity between the studies.  
4

5  
6 Subgroup analyses were performed for primary outcomes based on a priori  
7 assumptions, as per the PROSPERO protocol (20). For HbA1c we explored the  
8 possible effects of subgroups; a) the type of intervention based upon the EPOC  
9 taxonomy (*Appendix 2*); b) study quality and c) baseline HbA1c in the study  
10 populations (HbA1c 7.5% - 9.4%, or  $\geq 9.5\%$ ). After reviewing the included studies we  
11 also included study duration as a subgroup ( $< 12$  months or  $\geq 12$  months), as a wide  
12 range in study duration was found. Subgroup analyses for systolic blood pressure  
13 (SBP) and diastolic blood pressure (DBP) explored the effects of intervention-type  
14 based upon the EPOC taxonomy.  
15  
16  
17  
18  
19  
20  
21

22  
23 When important heterogeneity was identified, we investigated its causes using  
24 meta-regression. Meta-regression is an extension to subgroup analysis that allows  
25 the effect of continuous, as well as categorical, characteristics to be investigated  
26 (29). Meta-regression was performed to explore the effects of; a) study quality  
27 (using the overall assessment risk of bias); b) study population characteristics (e.g.  
28 gender, age and baseline HbA1c and SBP); c) intervention type (EPOC taxonomy);  
29 and d) study duration on the primary outcomes (29). Random effects meta-  
30 regression was performed using Stata 13 (27).  
31  
32  
33  
34  
35  
36  
37  
38  
39  
40  
41  
42  
43  
44  
45  
46  
47  
48  
49  
50  
51  
52  
53  
54  
55  
56  
57  
58  
59  
60

## Results

Overall 18,829 titles were screened and 42 full text articles met the inclusion criteria (Figure 1: PRISMA Flow diagram). All 42 studies were RCTs, encompassing 50 interventions in total, comprising 11,250 patients (22-24, 30-68). No other eligible study designs were identified.

### *Characteristics of studies*

Twenty-nine of the 42 studies were conducted in the United States, nine in Europe, two in Australia, one in Mexico and one in Israel. Follow-up of outcomes in the studies varied in length from 3 (53) to 36 months (46). The mean HbA1c at baseline across all studies was 9.5% (95% CI; 9.3%, 9.8%). The mean age of patients in the studies was 58.0, varying from 47.9 (62) to 67.5 (41) partly reflecting different inclusion criteria (Table 1). Thirty studies explicitly defined their study population as “poorly controlled”, “complicated” or “persistently poorly controlled”, whereas the other twelve had poorly controlled T2DM with HbA1c  $\geq$  59 mmol/mol (7.5%) as per the review inclusion criteria. Twenty-seven of the 42 studies reported SBP results (22-24, 30-36, 38, 39, 41, 45, 46, 48-51, 54, 58-60, 62, 65, 66, 68) and of these, twenty-three reported DBP (22-24, 31, 32, 34-36, 38, 39, 41, 45, 46, 48, 49, 51, 54, 58, 59, 62, 65, 66, 68). Twenty of the studies reported a lipid outcome (23, 24, 30-32, 35, 36, 38, 39, 41, 45, 46, 48, 51, 56, 58, 62, 65, 66, 68). All of the 42 studies reported at least one secondary outcome. Two studies were excluded from primary outcome analysis due to lack of appropriate data, despite efforts to contact authors (31, 61).



1  
2  
3  
4  
5  
6  
7  
8  
9  
10  
11  
12  
13  
14  
15  
16  
17  
18  
19  
20  
21  
22  
23  
24  
25  
26  
27  
28  
29  
30  
31  
32  
33  
34  
35  
36  
37  
38  
39  
40  
41  
42  
43  
44  
45  
46  
47  
48  
49

**Table 1: Characteristics of included studies**

| Study ID<br>Author,<br>Year<br>Country   | Patient participants<br>Total patients (n) Intervention (n) Control (n)<br>Age (mean, unless stated)<br>Gender (% male, unless stated)<br>HbA1c cutoff of 'poor control'<br>Baseline HbA1c level (mean)<br>Baseline BP (mean)<br>% on insulin at baseline<br>Diabetes duration: (years)<br><b>Practitioner and practice participants</b>                                                                                                  | Brief Intervention description                                                                                                                                                                                                                                                                                                            | Predominant Intervention type | Outcomes:<br>Primary<br>Secondary                                                                                                                                                                                                                                         | Study duration<br>Months |
|------------------------------------------|-------------------------------------------------------------------------------------------------------------------------------------------------------------------------------------------------------------------------------------------------------------------------------------------------------------------------------------------------------------------------------------------------------------------------------------------|-------------------------------------------------------------------------------------------------------------------------------------------------------------------------------------------------------------------------------------------------------------------------------------------------------------------------------------------|-------------------------------|---------------------------------------------------------------------------------------------------------------------------------------------------------------------------------------------------------------------------------------------------------------------------|--------------------------|
| Anzaldo-Campos<br><br>2016<br><br>Mexico | <b>Patient participants</b><br>301 Patients (99 Intervention 1 (PD) and 102 in Intervention 2 (PD-TE) and 100 Control)<br>Mean age: 51.5<br>% male: 33%<br>T2DM with HbA1c ≥ 8.0%<br>Mean HbA1c: 11.16<br>Mean BP: 122/ 78<br>% insulin baseline: NR<br>Mean diabetes duration: NR<br><b>Practitioner and practice participants</b><br>81 medical offices within one Family Medical Unit<br>Trained clinicians, nurses and peer educators | Two interventions:<br><br>Nurse care support and peer-led diabetes self-management education intervention (called Project Dulce).<br><br>Nurse care support and peer-led diabetes self-management education intervention. A technology-enhanced intervention, using cell phone uploads of glucose and BP levels and text message support. | Patient-centred               | Primary outcomes:<br>HbA1c at 10 months<br><br>Secondary outcomes:<br>Lipid and TAG profile, BP, BMI.<br>Self-reported outcomes: Self efficacy (Spanish Self-Efficacy), depression (PHQ-9), lifestyle (IMEVID), quality of life (Diabetes 39), diabetes knowledge (DKQ24) | 10 months                |

|                                              |                                                                                                                                                                                                                                                                                                                                                                     |                                                                                 |                 |                                                                                                                                                                                                                                                                                                                                                     |           |
|----------------------------------------------|---------------------------------------------------------------------------------------------------------------------------------------------------------------------------------------------------------------------------------------------------------------------------------------------------------------------------------------------------------------------|---------------------------------------------------------------------------------|-----------------|-----------------------------------------------------------------------------------------------------------------------------------------------------------------------------------------------------------------------------------------------------------------------------------------------------------------------------------------------------|-----------|
|                                              |                                                                                                                                                                                                                                                                                                                                                                     |                                                                                 |                 |                                                                                                                                                                                                                                                                                                                                                     |           |
| Basudev<br>2016<br>UK                        | <p><b>Patient participants</b><br/>235 Patients (93 Intervention and 115 Control)<br/>Mean age: 59.9<br/>% male: 57.4%<br/>T2DM with HbA1c &gt; 8.5%<br/>Mean HbA1c: 10.3<br/>Mean BP: 135/ 78<br/>% insulin baseline: 38%<br/>Mean diabetes duration: NR</p> <p><b>Practitioner and practice participants</b><br/>From six general practices in London</p>         | Virtual clinic integrating primary and specialist care.                         | Organisational  | <p>Primary outcomes:<br/>HbA1c at 12 months</p> <p>Secondary outcomes: BP; BMI; Lipids; Renal Function (eGFR).</p>                                                                                                                                                                                                                                  | 12 months |
| Blackberry<br>2013<br>Victoria,<br>Australia | <p><b>Patient participants</b><br/>473 Patients (236 Intervention and 237 Control)<br/>Mean age: 62.8<br/>% male: 57%<br/>T2DM with HbA1c &gt; 7.5%<br/>Mean HbA1c: 8.06<br/>Mean BP: NR<br/>% insulin baseline: 27%<br/>Mean diabetes duration 10 (5-14 range)</p> <p><b>Practitioner and practice participants</b><br/>59 practices<br/>Practice-based nurses</p> | Telephone coaching by nurses to support diabetes management and self monitoring | Patient-centred | <p>Primary outcomes:<br/>HbA1c at 18 months</p> <p>Secondary outcomes: Lipid and TAG profile; eGFR and urine ACR; BP; BMI; waist circumference; smoking status; Quality of Life; Diabetes Self efficacy; Diabetes support; Depression status; Intensification of diabetes.<br/>Others: Health service utilization; Physical activity, Nutrition</p> | 18 months |
| Capozza<br>2015<br>USA                       | <p><b>Patient participants</b><br/>93 patients (58 Intervention; 35 Control)<br/>Mean age: 58.7<br/>% male: 35.5%<br/>T2DM with HbA1c &gt; 8%<br/>Mean Baseline HbA1c 9.1%<br/>Mean Baseline BP: NR<br/>% insulin baseline: NR<br/>Diabetes duration: NR</p> <p><b>Practitioner and practice participants</b><br/>Recruited from 18 primary clinics</p>             | Text-message based behavioural intervention for T2DM                            | Patient-centred | <p>Primary outcome:<br/>Change in HbA1c from day 0 to day 180</p> <p>Secondary outcomes:<br/>Patient interaction and satisfaction (CSQ8) with the program</p>                                                                                                                                                                                       | 6 months  |

|                                            |                                                                                                                                                                                                                                                                                                                                                                                                                                                                                                    |                                                                                                                                            |                  |                                                                                                                                                                                                                                                                                                     |                                                                                                     |
|--------------------------------------------|----------------------------------------------------------------------------------------------------------------------------------------------------------------------------------------------------------------------------------------------------------------------------------------------------------------------------------------------------------------------------------------------------------------------------------------------------------------------------------------------------|--------------------------------------------------------------------------------------------------------------------------------------------|------------------|-----------------------------------------------------------------------------------------------------------------------------------------------------------------------------------------------------------------------------------------------------------------------------------------------------|-----------------------------------------------------------------------------------------------------|
| Choe<br>2005<br>USA                        | <p><b>Patient participants</b><br/>80 patients (41 Intervention and 39 Control)<br/>Age: 51.0 (all less 70)<br/>% male: 46%<br/>HbA1c <math>\geq</math> 8.0%<br/>Mean HbA1c 10.1<br/>Mean BP: NR<br/>% insulin baseline: 30%<br/>Diabetes duration: NR</p> <p><b>Practitioner and practice participants</b><br/>1 clinic<br/>1 pharmacist case manager</p>                                                                                                                                         | Pharmacist case management                                                                                                                 | Organisational.  | <p>Primary outcome:<br/>HbA1c level at 12 months</p> <p>Secondary outcomes: Rates of diabetes process measures (LDL, dilated retinal examination, urine ACR or use of ACE Inhibitors, monofilament testing for diabetic neuropathy, by chart review over 24 months); Rate of HbA1c measurement.</p> | 12 month intervention with primary outcome reporting at 12 months and a further 24 month follow up. |
| Crowley<br>2015<br>USA                     | <p><b>Patient participants</b><br/>50 patients (25 Intervention and 25 Control)<br/>Age: 60<br/>% male: 24%<br/>HbA1c &gt; 9%<br/>Definition: Yes, defined as 'persistently poor diabetes'<br/>Mean HbA1c 10.5%<br/>Mean SBP: 127/ 80<br/>% insulin baseline: NR<br/>Diabetes duration: 12</p> <p><b>Practitioner and practice participants</b><br/>Patients all receiving care by Durham VA primary care and endocrinology</p>                                                                    | Intensive telemedicine intervention for veterans                                                                                           | Organisational   | <p>Primary outcome:<br/>HbA1c</p> <p>Secondary outcomes: Diabetes self-management (Self-care inventory revised); Depression (PHQ-9); Self reported medication adherence (Morisky medication adherence); BP; Adverse events; Telephone encounters</p>                                                | 6 months                                                                                            |
| Dale<br>2009<br>England<br>Exploratory RCT | <p><b>Patient participants</b><br/>231 (90 (PS) Intervention 1, 44 (NS) Intervention 2 and 97 Control)<br/>Age: No mean age provided, but wide spectrum of ages from below 50 to over 70 in each of the intervention and control groups.<br/>% male: 57%<br/>HbA1c <math>\geq</math>7.5%<br/>Mean HbA1c: 8.6%<br/>Mean BP: NR<br/>% insulin baseline: 0%<br/>Diabetes duration: No mean, but between 1- 15 years mostly.</p> <p><b>Practitioner and practice participants</b><br/>29 practices</p> | <p>Two intervention telecare groups:</p> <p>a) Peer-support telecare intervention</p> <p>b) Diabetic specialist nurse telecare support</p> | Patient-centred. | <p>Primary outcome:<br/>Self efficacy (DMSES)</p> <p>Secondary outcomes: HbA1c; Cholesterol; BMI. Diabetes distress (PAID)</p>                                                                                                                                                                      | 6 months                                                                                            |

|                                                                    |                                                                                                                                                                                                                                                                                                                                                                                                                                                                                      |                                                                                                                                          |                 |                                                                                                                                                                                                                                        |           |
|--------------------------------------------------------------------|--------------------------------------------------------------------------------------------------------------------------------------------------------------------------------------------------------------------------------------------------------------------------------------------------------------------------------------------------------------------------------------------------------------------------------------------------------------------------------------|------------------------------------------------------------------------------------------------------------------------------------------|-----------------|----------------------------------------------------------------------------------------------------------------------------------------------------------------------------------------------------------------------------------------|-----------|
|                                                                    | Peer coaching or diabetes specialist nurse delivered                                                                                                                                                                                                                                                                                                                                                                                                                                 |                                                                                                                                          |                 |                                                                                                                                                                                                                                        |           |
| DePue<br>2013<br>U.S. Territory of America<br>Somoa<br>Cluster RCT | <p><b>Patient participants</b><br/>268 patients (104 Intervention and 164 Control)<br/>Age: 55<br/>% male: 38%</p> <p>Intervention did not target poor control per se, mean baseline HbA1c of 9.6% (SD of 2.1%) was deemed eligible for inclusion<br/>Mean HbA1c 9.8<br/>Mean BP: 133/ 84<br/>% insulin baseline: NR<br/>Mean diabetes duration: NR</p> <p><b>Practitioner and practice participants</b><br/>Cluster RCT based upon twelve village units<br/>Nurse care managers</p> | Nurse–Community Health Worker Team in American Somoa                                                                                     | Organisational. | <p>Primary outcome:<br/>HbA1c</p> <p>Secondary outcomes: BP; BMI; Dietary intake; Medication adherence; Physical activity; Adapted measures of diabetes beliefs</p>                                                                    | 12 months |
| Edelman<br>2010<br>North Carolina and Virginia, USA.               | <p><b>Patient participants</b><br/>239 patients (133 Intervention and 106 Control)<br/>Age: 61.9<br/>% male: 96%</p> <p>T2DM HbA1c &gt;7.5 AND (SPB &gt; 140 DBP &gt; 90)<br/>Mean HbA1c: 9.2%<br/>Mean BP: 152/ 84<br/>% insulin baseline: unclear<br/>Duration of diabetes: NR</p> <p><b>Practitioner and practice participants</b><br/>2 VA centres<br/>A care team involving internist, pharmacist, a nurse and educator</p>                                                     | Enrollment into a general medical clinic (GMC) with an internist, pharmacist and a nurse or educator that met seven times over 12 months | Organisational. | <p>Primary outcomes:<br/>HbA1c</p> <p>Secondary outcomes: Systolic blood pressure; Adherence to medications; Self-efficacy; Adverse events through structured self report and medical record review; Health utilization; Cost data</p> | 12 months |
| Edelman<br>2015<br>USA                                             | <p><b>Patient participants</b><br/>377 patients (193 Intervention and 184 Control)<br/>Age: 58.7<br/>% male: 45.4%</p> <p>HbA1c <math>\geq</math> 7.5 (and HTN)<br/>Mean HbA1c 9.1%<br/>Mean BP: 142.2/ 80.7<br/>% insulin baseline: NR</p>                                                                                                                                                                                                                                          | Nurse case management                                                                                                                    | Organisational  | <p>Primary outcome:<br/>HbA1c</p> <p>Secondary outcomes: BP; Weight; Physical activity; Self-efficacy; Health literacy; Medication adherence (via self report)</p>                                                                     | 24 months |

|                         |                                                                                                                                                                                                                                                                                                                                                                                                   |                                                                                                                                                                                                                                                    |                 |                                                                                                                                                                                                                                                                                                                                                                                                                             |                                                          |
|-------------------------|---------------------------------------------------------------------------------------------------------------------------------------------------------------------------------------------------------------------------------------------------------------------------------------------------------------------------------------------------------------------------------------------------|----------------------------------------------------------------------------------------------------------------------------------------------------------------------------------------------------------------------------------------------------|-----------------|-----------------------------------------------------------------------------------------------------------------------------------------------------------------------------------------------------------------------------------------------------------------------------------------------------------------------------------------------------------------------------------------------------------------------------|----------------------------------------------------------|
|                         | Diabetes duration: NR<br><b>Practitioner and practice participants</b><br>9 primary care practices in Duke.                                                                                                                                                                                                                                                                                       |                                                                                                                                                                                                                                                    |                 |                                                                                                                                                                                                                                                                                                                                                                                                                             |                                                          |
| Farmer<br>2012<br>UK    | <b>Patient participants</b><br>211 patients (126 Intervention and 85 Control)<br>Age: 63.2<br>% male: 65%<br>HbA1c $\geq$ 7.5%<br>Mean HbA1c: 8.3%<br>Mean BP: 136.9/ 78.2<br>% insulin baseline: NR<br>Mean diabetes duration: 6.8 years<br><b>Practitioner and practice participants</b><br>13 practices<br>Practice nurses                                                                     | Nurse-led, multilevel intervention to support medication adherence                                                                                                                                                                                 | Organisational  | Primary outcome:<br>% days over a 12 week period on which the correct number of doses of main glucose lowering medication was taken each day as prescribed.<br><br>Secondary outcomes: Hba1c at 0 and 20 weeks (from protocol); Functional status as per SF 12 Physical and SF 12 Mental; Diabetes treatment satisfaction and satisfaction with nurse; MARS Self reported adherence (range 5-25); % reporting hypoglycaemia | 12 weeks (intervention was 8 weeks into a 20 week trial) |
| Forjough<br>2014<br>USA | <b>Patient participants</b><br>376 patients (101 Intervention 1 (CDSMP), 81 Intervention 2 (PDA), 99 Intervention 3 (PDA, CDSMP and 95 Control)<br>Age: 57.6<br>% male: 44.0%<br>HbA1c >7.5%<br>Mean HbA1c: 9.3<br>Mean BP: 134.8/ 77<br>% insulin baseline: NR<br>Mean diabetes duration: NR<br><b>Practitioner and practice participants</b><br>7 practices involved<br>Technology intervention | Three intervention groups, reflecting the individual and combined effects of a behavioural and technology intervention; a chronic Disease Self-Management Program (CDSMP) and a diabetes self-care software on a personal digital assistant (PDA). | Patient-centred | Primary:<br>HbA1c<br><br>Secondary: BMI; BP; Self management behavioural measures (e.g. foot care)                                                                                                                                                                                                                                                                                                                          | 12 months                                                |
| Frosch<br>2011<br>USA   | <b>Patient participants</b><br>201 patients (100 Intervention and 101 Control)<br>Age: 55.5<br>% male: 51.5%<br>HbA1c > 8.0<br>Mean HbA1c: 9.6%<br>Mean BP: 127.7/ 74.0<br>% insulin baseline: NR<br>Mean diabetes duration: 9.5<br><b>Practitioner and practice participants</b><br>3 academic primary care practices and 1                                                                      | A video behavioural support intervention by nurse educators with a workbook followed by 5 sessions of telephone coaching.                                                                                                                          | Patient-centred | Primary:<br>HbA1c<br><br>Secondary: LDL Cholesterol; BP; BMI; Prescribed medications; Diabetes knowledge (23 point Diabetes knowledge test); Self-care behaviours (SDSCA)                                                                                                                                                                                                                                                   | Unclear, possibly over 6 months                          |

|                          |                                                                                                                                                                                                                                                                                                                                                                       |                                                                                                            |                 |                                                                                                                                                                           |           |
|--------------------------|-----------------------------------------------------------------------------------------------------------------------------------------------------------------------------------------------------------------------------------------------------------------------------------------------------------------------------------------------------------------------|------------------------------------------------------------------------------------------------------------|-----------------|---------------------------------------------------------------------------------------------------------------------------------------------------------------------------|-----------|
|                          | community based safety net clinic<br>Nurse educators                                                                                                                                                                                                                                                                                                                  |                                                                                                            |                 |                                                                                                                                                                           |           |
| Guerci<br>2003<br>France | <b>Patient participants</b><br>988 patients (510 Intervention and 478 Control)<br>Age: 60.6<br>% male: 53.7%<br>HbA1c $\geq$ (7.5 and 11) diabetes.<br>Mean HbA1c 8.95%<br>Mean SBP: 139.6, 80.4<br>% insulin baseline: 0%<br>Mean diabetes duration months: 96.6<br><b>Practitioner and practice participants</b><br>265 GPs involved, uncertain number of practices | A self-monitoring of blood glucose intervention<br><br>Auto-Surveillance Intervention Active (ASIA) study. | Patient-centred | Primary:<br>HbA1c<br><br>Secondary: Changes in fasting glucose; Symptomatic hyoglycaemia; BP; Weight; Diet; Drugs; Adverse drug event                                     | 6 months  |
| Heisler<br>2010<br>USA   | <b>Patient participants</b><br>244 patients (126 Intervention and 119 Control (NCM))<br>Age: 62.0<br>% male: 100%<br>HbA1c > 7.5%<br>Mean HbA1c 7.98<br>Mean BP: 138.4/ 76.5<br>% insulin baseline: 56%<br>Diabetes duration: NR<br><b>Practitioner and practice participants</b><br>Two VA facilities<br>Nurse and peer case managers                                | Reciprocal peer support                                                                                    | Patient-centred | Primary<br>HbA1c 6 months<br><br>Secondary: Medication adherence; Diabetes emotional distress; Diabetes specific social support; Medication changes Attendance at clinics | 6 months  |
| Jacobs<br>2012<br>USA    | <b>Patient participants</b><br>396 patients (195 Intervention and 201 Control)<br>Age: 62.9<br>% male: 50%<br>HbA1c > 8.0%<br>Mean HbA1c 9.35<br>Mean BP: 138.7/ 78.9<br>% insulin baseline: NR<br>Mean diabetes duration: NR<br><b>Practitioner and practice participants</b><br>5 pharmacists, patients came from practices of                                      | A pharmacist assisted medication program intervention                                                      | Organisational  | Primary<br>No specific primary outcome given or sample size:<br><br>Secondary: HbA1c < 7%; LDL Cholesterol < 100mg/dl; BP < 130/ 80mmHg                                   | 12 months |

|                          |                                                                                                                                                                                                                                                                                                                                                                |                                                                |                 |                                                                                                                                                                                                                                                                                                                                                                                                   |                     |
|--------------------------|----------------------------------------------------------------------------------------------------------------------------------------------------------------------------------------------------------------------------------------------------------------------------------------------------------------------------------------------------------------|----------------------------------------------------------------|-----------------|---------------------------------------------------------------------------------------------------------------------------------------------------------------------------------------------------------------------------------------------------------------------------------------------------------------------------------------------------------------------------------------------------|---------------------|
|                          | 66 primary care physicians.                                                                                                                                                                                                                                                                                                                                    |                                                                |                 |                                                                                                                                                                                                                                                                                                                                                                                                   |                     |
| Jameson<br>2010<br>USA   | <p><b>Patient participants</b><br/>104 patients (52 Intervention and 52 Control)<br/>Age: 49.6<br/>% male: 49%<br/>HbA1c <math>\geq</math> 9.0% (two of the population had T1DM)<br/>Mean HbA1c: 10.8%<br/>Mean BP: NR<br/>% insulin baseline: 49.6%<br/>Mean diabetes duration: NR</p> <p><b>Practitioner and practice participants</b><br/>1 pharmacist.</p> | A pharmacist collaborative management intervention             | Organisational  | <p>Primary:<br/>HbA1c</p> <p>Secondary: % of patients with a 1.0% decrease in HbA1c.</p>                                                                                                                                                                                                                                                                                                          | 12 months           |
| Jovanovic<br>2004<br>USA | <p><b>Patient participants</b><br/>362 patients (186 Intervention and 172 Control)<br/>Age: 57.0<br/>% male: 23.8%<br/>HbA1c &gt; 7.5<br/>Mean HbA1c: 9.65%<br/>Mean BP: 135/ 79<br/>% insulin baseline: NR<br/>Mean diabetes duration: 11.1</p> <p><b>Practitioner and practice participants</b><br/>Unclear number of case managers and practices</p>        | Diabetes case management by a nurse or dietician               | Organisational  | <p>Primary:<br/>HbA1c</p> <p>Secondary: % participants achieving HbA1c goals medication usage; BP ; Lipids; BMI; Frequency of hypoglycaemia</p>                                                                                                                                                                                                                                                   | 36 months           |
| Keogh<br>2011<br>Ireland | <p><b>Patient participants</b><br/>121 patients (60 Intervention and 61 Control)<br/>Age: 58.6<br/>% male: 64%<br/>HbA1c <math>\geq</math> 8.0%<br/>Median HbA1c: 9.2<br/>Mean BP: 138.8/ 76.8<br/>% insulin baseline: 52%<br/>Mean diabetes duration: 9.4</p> <p><b>Practitioner and practice participants</b><br/>One practice<br/>One psychologist</p>      | Psychological family intervention                              | Organisational  | <p>Primary outcome:<br/>Hba1c</p> <p>Secondary outcomes: Illness perceptions (Brief illness Perception Questionnaire); Psychological wellbeing (12-item Well-Being questionnaire); BP; BMI; Diabetes self management (Summary of Diabetes Self-care Activities Questionnaire); Self Efficacy (UK version Diabetes Self-Efficacy Scale); Family support (Diabetes Family Behaviour Checklist).</p> | 6 months            |
| Kim<br>2009              | <p><b>Patient participants</b><br/>83 patients (41 Intervention and 42 Control)<br/>Age: 56.4</p>                                                                                                                                                                                                                                                              | A Community-based, culturally tailored behavioral intervention | Patient-centred | <p>Primary:<br/>HbA1c</p>                                                                                                                                                                                                                                                                                                                                                                         | 30 weeks (7 months) |

|                           |                                                                                                                                                                                                                                                                                                                                                                                                                                                                            |                                                                                              |                 |                                                                                                                                                                                                                                                                                                    |                      |
|---------------------------|----------------------------------------------------------------------------------------------------------------------------------------------------------------------------------------------------------------------------------------------------------------------------------------------------------------------------------------------------------------------------------------------------------------------------------------------------------------------------|----------------------------------------------------------------------------------------------|-----------------|----------------------------------------------------------------------------------------------------------------------------------------------------------------------------------------------------------------------------------------------------------------------------------------------------|----------------------|
| USA                       | <p>% male: 55.4%</p> <p>HbA1c <math>\geq</math> 7.5%</p> <p>Mean HbA1c: 9.25%</p> <p>Mean BP 132.1/ 79.3</p> <p>% insulin baseline: NR</p> <p>Mean diabetes duration: NR</p> <p><b>Practitioner and practice participants</b></p> <p>Uncertain number practices</p> <p>Community nurse delivered</p>                                                                                                                                                                       |                                                                                              |                 | <p>Secondary: Diabetes knowledge test (DKT)* Self efficacy (Stanford Chronic Disease Self-Efficacy scale); Self care (Diabetes self care activitiis (SDSCA); Depression (Kim Depression Scale for Korean Americans); Quality of Life (Diabetes Quality of Life Measure (DQQL); Lipids; BP; BMI</p> | 6 month intervention |
| Krein<br>2004<br>USA      | <p><b>Patient participants</b></p> <p>246 patients (123 Intervention and 123 Control)</p> <p>Age: 61</p> <p>% male: 97%</p> <p>HbA1c <math>\geq</math>7.5%</p> <p>Mean HbA1c 9.25</p> <p>Mean BP: 145/ 86</p> <p>% insulin baseline: 59%</p> <p>Mean diabetes duration: 11</p> <p><b>Practitioner and practice participants</b></p> <p>One VA centre, unclear number of practices</p> <p>Two nurse case managers</p>                                                       | Case management by nurse practitioners                                                       | Organisational  | <p>Primary: HbA1c</p> <p>Secondary: LDL; Cholesterol; BP; Health status; Patient satisfaction; Inpatient and outpatient encounters, pharmacy and laboratory use; Semi structured interviews also done.</p>                                                                                         | 18 months            |
| Long<br>2012<br>USA       | <p><b>Patient participants</b></p> <p>118 patients (38 Intervention 1 (PM), 40 Intervention 2 (FI) and 39 Control)</p> <p>Age: 60</p> <p>% male: 94%</p> <p>HbA1c &gt; 8.0% (two patients may have had T1DM)</p> <p>HbA1c Mean: 9.7</p> <p>Mean BP: NR</p> <p>% insulin baseline: 74%</p> <p>Mean diabetes duration: NR</p> <p>Diabetes over 10 years: 58%</p> <p><b>Practitioner and practice participants</b></p> <p>Unclear number of practices</p> <p>Peer mentors</p> | <p>Two interventions:</p> <p>Peer mentoring</p> <p>Financial incentivisation of patients</p> | Patient-centred | <p>Primary: Hba1c</p> <p>Secondary: Patient recollection of hypoglycaemic event</p>                                                                                                                                                                                                                | 6 months             |
| Maislos<br>2002<br>Israel | <p><b>Patient participants</b></p> <p>82 patients (48 Intervention and 34 Control)</p> <p>Age: 60.5</p> <p>% male: 29.5%</p> <p>HbA1c <math>\geq</math> 10%</p>                                                                                                                                                                                                                                                                                                            | A mobile clinic providing interdisciplinary care                                             | Organisational  | <p>Primary: Decrease of HbA1c of 0.5% at six months</p> <p>Secondary: Compliance with study protocol at six months</p>                                                                                                                                                                             | 6 months             |



|                                                            |                                                                                                                                                                                                                                                                                                                                                                                             |                                                                                                                                                                                                 |                       |                                                                                                                                                                                                                                                                                                 |                  |
|------------------------------------------------------------|---------------------------------------------------------------------------------------------------------------------------------------------------------------------------------------------------------------------------------------------------------------------------------------------------------------------------------------------------------------------------------------------|-------------------------------------------------------------------------------------------------------------------------------------------------------------------------------------------------|-----------------------|-------------------------------------------------------------------------------------------------------------------------------------------------------------------------------------------------------------------------------------------------------------------------------------------------|------------------|
|                                                            | <p>Mean HbA1c 11.35<br/> Mean BP: NR<br/> % insulin baseline: 20%<br/> Duration diabetes: 10<br/> <b>Practitioner and practice participants</b><br/> 2 practices involved via 1 mobile clinic</p>                                                                                                                                                                                           |                                                                                                                                                                                                 |                       |                                                                                                                                                                                                                                                                                                 |                  |
| <p>Mathers<br/> 2012<br/> UK<br/> Cluster RCT</p>          | <p><b>Patient participants</b><br/> 175 patients (95 Intervention and 80 Control)<br/> Age: 64<br/> % male: 54%<br/> HbA1c <math>\geq</math> 7.5<br/> Mean HbA1c: 8.7%<br/> Mean BP: NR<br/> % insulin baseline: NR<br/> Duration diabetes: 7.8<br/> <b>Practitioner and practice participants</b><br/> 49 practices involved<br/> GPs and nurses from practices delivered intervention</p> | <p>Patient decision aid to improve decision quality and glycaemic control</p>                                                                                                                   | <p>Professional</p>   | <p>Primary:<br/> HbA1c</p> <p>Secondary: Decisional conflict scale score- indicator of decision quality; Knowledge and realistic expectations of the risks and benefits; Regret scale</p>                                                                                                       | <p>6 months</p>  |
| <p>McDermott<br/> 2015<br/> Australia<br/> Cluster RCT</p> | <p><b>Patient participants</b><br/> 213 patients (113 Intervention and 100 Control)<br/> Age: 47.9<br/> % male: 37.6%<br/> HbA1c <math>\geq</math> 8.5 (69mmol/mol)<br/> Mean HbA1c 10.7<br/> Mean BP: 131/ 79.3<br/> % insulin baseline: 44.4%<br/> Diabetes duration: NR<br/> <b>Practitioner and practice participants</b><br/> 12 remote communities in north Queensland.</p>           | <p>Community-based health-worker led case management approach to the care of Indigenous adults with poorly controlled type 2 diabetes in primary care services in remote northern Australia</p> | <p>Organisational</p> | <p>Primary outcome:<br/> HbA1c level at 18 months</p> <p>Secondary outcomes:<br/> BP<br/> BMI<br/> Lipids<br/> Medications<br/> ACR<br/> eGFR<br/> Test of Functional Health Literacy for Adults (TOFHLA)<br/> Assessment of Quality of Life (AQoL) instrument<br/> Implementation Fidelity</p> | <p>18 months</p> |
| <p>McMahon<br/> 2005<br/> USA</p>                          | <p><b>Patient participants</b><br/> 104 patients (52 Intervention and 52 Control)<br/> Age: 63.5<br/> % male: 99%<br/> HbA1c <math>\geq</math> 9%<br/> Mean HbA1c: 10.0%<br/> Mean BP: 140/ 81<br/> % insulin baseline: 54%<br/> Duration diabetes: 12.3 years</p>                                                                                                                          | <p>Web-based care management</p>                                                                                                                                                                | <p>Organisational</p> | <p>Primary:<br/> HbA1c</p> <p>Secondary<br/> Systolic BP<br/> Diastolic BP<br/> TAG<br/> LDL Cholesterol<br/> HDL Cholesterol</p>                                                                                                                                                               | <p>12 months</p> |

|                                        |                                                                                                                                                                                                                                                                                                                                                                                                 |                                                                                                  |                 |                                                                                                                                                                                                                                      |                                             |
|----------------------------------------|-------------------------------------------------------------------------------------------------------------------------------------------------------------------------------------------------------------------------------------------------------------------------------------------------------------------------------------------------------------------------------------------------|--------------------------------------------------------------------------------------------------|-----------------|--------------------------------------------------------------------------------------------------------------------------------------------------------------------------------------------------------------------------------------|---------------------------------------------|
|                                        | <b>Practitioner and practice participants</b><br>Practice number unclear<br>Care manager available                                                                                                                                                                                                                                                                                              |                                                                                                  |                 |                                                                                                                                                                                                                                      |                                             |
| Mons<br>2013<br>Germany                | <b>Patient participants</b><br>204 patients (103 Intervention and 101 Control)<br>Age: 67.5<br>% male: 61%<br>HbA1c > 7.5%<br>Mean HbA1c: 8.1%<br>Mean BP: 137.5/ 80<br>% insulin baseline: NR<br>Duration diabetes: NR<br><b>Practitioner and practice participants</b><br>10 GP practices<br>Practice nurses                                                                                  | Supportive telephone counseling                                                                  | Patient-centred | Primary<br>HbA1c<br><br>Secondary Systolic BP; Diastolic BP; Cholesterol; Health related quality of life (Short Form General Health Survey: SF-12); Symptoms of depression: Geriatric depression scale                               | 18 months                                   |
| O'Connor<br>2014<br>USA<br>Cluster RCT | <b>Patient participants</b><br>1102 patients (569 Intervention and 533 Control)<br>Age: 43% ≥ 65 years. ~ 61 mean<br>% male: 51.3%<br>HbA1c ≥ 8%<br>Mean HbA1c: 9.8%<br>Mean BP: NR<br>% insulin baseline: NR<br>Diabetes duration: NR<br><b>Practitioner and practice participants</b><br>Large medical groups in California.<br>Clusters defined on their linkage to primary care physicians. | Telephone Outreach to Improve Medication Adherence and Metabolic Control in Adults With Diabetes | Organisational  | Primary Outcome:<br>Medication adherence (at least one prescription fill within 60 days of prescription date).<br><br>Secondary Outcomes: Medication persistence (two or more prescription fills within 180 days); HbA1c; BP; Lipids | 6 months                                    |
| Odegard<br>2005<br>USA                 | <b>Patient participants</b><br>77 patients (43 Intervention and 34 Control)<br>Age: 51.8<br>% male: 57%<br>HbA1c ≥ 9.0%<br>Mean HbA1c: 10.4%<br>Mean BP: NR<br>% insulin baseline: 32%<br>Duration diabetes: 7.6<br><b>Practitioner and practice participants</b><br>7 primary care clinics                                                                                                     | A pharmacist intervention care management intervention                                           | Organisational  | Primary<br>HbA1c 12 months<br><br>Secondary: Medication appropriateness (Medication Appropriate Index/ MAI); Self reported adherence by questionnaire                                                                                | 6 month intervention but HbA1c at 12 months |

|                                        |                                                                                                                                                                                                                                                                                                                                                                            |                                                                      |                 |                                                                                                                                                                                                                                  |                                                                                         |
|----------------------------------------|----------------------------------------------------------------------------------------------------------------------------------------------------------------------------------------------------------------------------------------------------------------------------------------------------------------------------------------------------------------------------|----------------------------------------------------------------------|-----------------|----------------------------------------------------------------------------------------------------------------------------------------------------------------------------------------------------------------------------------|-----------------------------------------------------------------------------------------|
|                                        | Pharmacists: Unclear number                                                                                                                                                                                                                                                                                                                                                |                                                                      |                 |                                                                                                                                                                                                                                  |                                                                                         |
| Palmas<br>2014<br>USA                  | <p><b>Patient participants</b><br/>360 patients (181 Intervention and 179 Control)<br/>Age: 57.6<br/>% male: 38%<br/>HbA1c <math>\geq</math> 8.0%<br/>Mean HbA1c: 8.7%<br/>Mean BP: 136/ 81<br/>% insulin baseline: NR<br/>Duration diabetes: NR</p> <p><b>Practitioner and practice participants</b><br/>Unclear number GP practices<br/>Two community health workers</p> | Community health worker (CHW) intervention in an Hispanic population | Patient-centred | <p>Primary:<br/>HbA1c</p> <p>Secondary: Systolic BP; Diastolic BP; LDL Cholesterol; Medication adherence; Dosage and intensity; Physical activity; Diet; Depression</p>                                                          | 12 months                                                                               |
| Phillis-Tsimikas<br>2011<br>USA        | <p><b>Patient participants</b><br/>207 patients (104 Intervention and 103 Control)<br/>Age: 50.7<br/>% male: 29.5%<br/>HbA1c &gt; 8.0%<br/>Mean HbA1c: 10.4%<br/>Mean BP: 122.6/75<br/>Duration diabetes: NR<br/>% insulin baseline: NR</p> <p><b>Practitioner and practice participants</b><br/>Unclear number GP practices participating<br/>Peer educators</p>          | Peer-led diabetes education programs in high-risk Mexican Americans  | Patient-centred | <p>Primary:<br/>HbA1c</p> <p>Secondary: Lipids; BP; BMI; Self management behaviours and Depression (in separate publication)</p>                                                                                                 | 10 months<br><br>Intervention was 4 months and primary outcome was 6 months after this. |
| Polonsky<br>2011<br>USA<br>Cluster RCT | <p><b>Patient participants</b><br/>499 patients (256 Intervention and 227 Control)<br/>Age: 55.8<br/>% male: 53.2%<br/>HbA1c &gt; 7.5%<br/>Mean HbA1c: 8.9<br/>Mean BP: NR<br/>% on insulin: 0%<br/>Duration diabetes: 7.6</p> <p><b>Practitioner and practice participants</b><br/>34 GP practices participating</p>                                                      | Self blood glucose monitoring                                        | Patient-centred | <p>Primary:<br/>Hba1c</p> <p>Secondary: Treatment intensification; Total number of visits with medication or lifestyle modifications; Time to the first treatment change; Frequency of SMBG; GWB from WHO-5 Well-Being Index</p> | 12 months                                                                               |
| Protheroe                              | <b>Patient participants</b>                                                                                                                                                                                                                                                                                                                                                | Lay Health Trainer (LHT) interviews with                             | Organisational  | Feasibility study                                                                                                                                                                                                                | 7 months                                                                                |

|                                     |                                                                                                                                                                                                                                                                                                                                                                                                                                                             |                                                                                   |                 |                                                                                                                                                                                                                                                               |           |
|-------------------------------------|-------------------------------------------------------------------------------------------------------------------------------------------------------------------------------------------------------------------------------------------------------------------------------------------------------------------------------------------------------------------------------------------------------------------------------------------------------------|-----------------------------------------------------------------------------------|-----------------|---------------------------------------------------------------------------------------------------------------------------------------------------------------------------------------------------------------------------------------------------------------|-----------|
| 2016<br>UK<br>Feasibility study     | 76 Patients (37 Intervention and 39 Control)<br>Mean age: 63.1<br>% male: 50.3%<br>T2DM with HbA1c > 7.5%<br>Mean HbA1c: 9.3<br>Mean BP: NR<br>% insulin baseline: NR<br>Mean diabetes duration: 61% > 5 years<br><b>Practitioner and practice participants</b><br>From six family doctor practices                                                                                                                                                         | patients, creating a self-management plan, with supportive phone calls.           |                 | Outcomes included: Deprivation; Health literacy; Diabetes self care; Diabetes Quality of Life; Diabetes UK Scale Items, Health-related Quality of Life, Warwick- Edinburgh Mental Well-Being, Illness Perception, health Status Measure, Resource Use, HbA1c. |           |
| Quinn<br>2011<br>USA<br>Cluster RCT | <b>Patient participants</b><br>Cluster trial, 3 intervention groups, 1 control<br>163 patients (Intervention 1 (CO) 23, Intervention 2 (CPP) 22, Intervention 3 (CPDS) 62 and Control 56)<br>Age: 52.9 (weighted average)<br>% male: 52.5% (weighted average)<br>HbA1c ≥ 7.5%<br>Mean HbA1c: 9.4<br>Mean SBP: 131/ NR<br>% insulin baseline: NR<br>Duration diabetes: 8.2<br><b>Practitioner and practice participants</b><br>26 GP practices participating | Mobile phone-based treatment/ behavioural coaching intervention                   | Patient-centred | Primary:<br>HbA1c<br><br>Secondary: PHQ-9 questionnaire for depressive symptoms; Self completion patient outcome instrument; Diabetes Distress Scale; BP; Lipids; Hypoglycaemic events; Hospitalisations and ED visits                                        | 12 months |
| Rothman<br>2005<br>USA              | <b>Patient participants</b><br>217 patients (112 Intervention and 105 Control)<br>Age: 55.5<br>% male: 44%<br>HbA1c ≥ 8.0%<br>Mean HbA1c: 11<br>Mean BP: 138.5/ 81<br>% insulin baseline: 39%<br>Duration diabetes: 8.5<br><b>Practitioner and practice participants</b><br>Three pharmacists                                                                                                                                                               | A primary care-based disease management program delivered by trained pharmacists. | Organisational  | Primary:<br>HbA1c<br><br>Secondary: BP; Aspirin; Lipids; Diabetes knowledge Satisfaction (Diabetes Treatment Satisfaction Questionnaire); Use of clinical services; Adverse events; Process measures (time spent with patients and medication changes)        | 12 months |
| Schillinger<br>2009                 | <b>Patient participants</b><br>339 patients (112 intervention 1 (ATSM), 113 intervention 2 (GVC) and 114 Control)<br>Age: 56.1                                                                                                                                                                                                                                                                                                                              | Two interventions:<br><br>Self-Management Support via 1/                          | Patient-centred | Primary:<br>Self management behaviour<br><br>Secondary: Patient assessment of chronic illness care                                                                                                                                                            | 12 months |

|                         |                                                                                                                                                                                                                                                                                                                                                                                                                  |                                                                                        |                 |                                                                                                                                                                                                                                                                              |           |
|-------------------------|------------------------------------------------------------------------------------------------------------------------------------------------------------------------------------------------------------------------------------------------------------------------------------------------------------------------------------------------------------------------------------------------------------------|----------------------------------------------------------------------------------------|-----------------|------------------------------------------------------------------------------------------------------------------------------------------------------------------------------------------------------------------------------------------------------------------------------|-----------|
| USA                     | % male: 41 %<br>HbA1c $\geq$ 8.0%<br>Mean HbA1c: 9.5%<br>Mean BP: 140/ 77.3<br>% insulin baseline: 38%<br>Duration diabetes: 9.5<br><b>Practitioner and practice participants</b><br>Uncertain number GPs- in a safety net health system                                                                                                                                                                         | Automated telephone self management support (ATSM) and 2/ Group medical visits (GMVs). |                 | (PACIC); Diabetes Quality Improvement Program; Interpersonal Processes of Care for Diverse Populations (IPC) instrument; Self management behavior (Foods, diets, exercise, self monitoring); SF-12 instrument for QoL; Functional status- likert scale; HbA1c; SBP; DBP; BMI |           |
| Sen<br>2014<br>USA      | <b>Patient participants</b><br>75 patients (21 Intervention 1 (low), 26 Intervention 2 (high) and 28 Control)<br>Age: 54.3<br>% male: 36%<br>HbA1c $\geq$ 7.5% (90-95% had T2DM from personal correspondence with author)<br>Mean HbA1c 9.5%<br>Mean BP: 132.9/ 86.1<br>% insulin baseline: NR<br>Mean diabetes duration: NR<br><b>Practitioner and practice participants</b><br>1 practice                      | Financial incentives for home based monitoring- two interventions                      | Financial       | Primary:<br>Adherence over three months<br><br>Secondary: HbA1c                                                                                                                                                                                                              | 12 weeks  |
| Sugiyama<br>2015<br>USA | <b>Patient participants</b><br>516 patients (258 Intervention and 258 Control)<br>Age: 63<br>% male: 30%<br>HbA1c $\geq$ 8.0%<br>Mean HbA1c: 9.7<br>Mean BP: NR<br>% insulin baseline: NR<br>Diabetes duration: NR<br><b>Practitioner and practice participants</b><br>Participants were recruited from senior centers, churches, community clinics, and Los Angeles County Community and Senior Service Centers | Diabetes self management education by trained health educators.                        | Patient-centred | Primary:<br>HbA1c<br><br>Secondary: Change Mental Component Summary Score (MCS-12) from the SF-12; Social support score from the Diabetes Care Profile                                                                                                                       | 6 months  |
| Tang<br>2013            | <b>Patient participants</b><br>415 patients (203 Intervention and 213 Control)<br>Age: 54<br>% male: 60%                                                                                                                                                                                                                                                                                                         | Online disease management of diabetes                                                  | Patient-centred | Primary:<br>HbA1c<br><br>Secondary: SBP; DBP; LDL; 10 year Framingham risk;                                                                                                                                                                                                  | 12 months |

|                       |                                                                                                                                                                                                                                                                                                                                      |                                                                                                                        |                 |                                                                                                                                                                                                                                                                                                                                                          |           |
|-----------------------|--------------------------------------------------------------------------------------------------------------------------------------------------------------------------------------------------------------------------------------------------------------------------------------------------------------------------------------|------------------------------------------------------------------------------------------------------------------------|-----------------|----------------------------------------------------------------------------------------------------------------------------------------------------------------------------------------------------------------------------------------------------------------------------------------------------------------------------------------------------------|-----------|
| USA                   | HbA1c $\geq$ 7.5%<br>Mean HbA1c: 9.3<br>Mean BP: 126.6/ 72.7<br>% insulin baseline: NR<br>Mean diabetes duration: NR<br><b>Practitioner and practice participants</b><br>Uncertain number practices                                                                                                                                  |                                                                                                                        |                 | Satisfaction; Psychosocial wellbeing; Healthcare utilization                                                                                                                                                                                                                                                                                             |           |
| Taylor<br>2003<br>USA | <b>Patient participants</b><br>169 patients (84 Intervention and 85 Control)<br>Age: 55.2<br>% male: 52.7%<br>HbA1c > 10.0%<br>Mean HbA1c: 9.5%<br>Mean BP: 127.5/ 72.8<br>% insulin baseline: NR<br>Mean diabetes duration NR<br><b>Practitioner and practice participants</b><br>Uncertain number practices<br>Nurse care managers | Nurse care management (NCM)                                                                                            | Organisational  | Primary:<br>% of patients in 'target' HbA1c<br><br>Secondary: Total cholesterol; HDL Cholesterol; LDL cholesterol; TAGs; Glucose; Microalbuminuria; SBP; DBP; Processes of care (foot, eye, dental exam and flu shot); Psychosocial (SF 26 for QoL and Duke Activity Status); Patient and physician satisfaction; Medical utilization (physician visits) | 12 months |
| Thom<br>2013<br>USA   | <b>Patient participants</b><br>299 patients (151 Intervention and 148 Control)<br>Age: 55.2<br>% male: 47.8%<br>HbA1c $\geq$ 8.0%<br>Mean HbA1c: 10.0<br>Mean BP: 143.2/ NR<br>% insulin baseline: 55%<br>Mean diabetes duration: 8.9<br><b>Practitioner and practice participants</b><br>6 practices included<br>Peer coaches       | Peer health coaching                                                                                                   | Patient-centred | Primary:<br>HbA1c<br><br>Secondary: % patients whose HbA1c dropped 1%; % patients with a HbA1c less 7.5; LDL; SBP; BMI                                                                                                                                                                                                                                   | 6 months  |
| Wild<br>2016<br>UK    | <b>Patient participants</b><br>231 Patients (160 Intervention and 161 Control)<br>Mean age: 61<br>% male: 66.8%<br>T2DM with HbA1c > 7.5%<br>Mean HbA1c: 8.9<br>Mean BP: 134/79<br>% insulin baseline: 26%                                                                                                                           | Supported telemonitoring involving twice-weekly self-measurement of glucose and transmission to a general practitioner | Patient-centred | Primary outcomes:<br>HbA1c at 9 months<br><br>Secondary outcomes: BP; BMI; Lipid and TAG profile; eGFR and urine ACR; UKPDS risk score; Anxiety and Depression score; Quality of Life; Diabetes Self efficacy; Self-reported physical activity, alcohol intake, exercise tolerance and diabetes knowledge; healthcare utilization.                       | 9 months  |

1  
2  
3  
4  
5  
6  
7  
8  
9  
10  
11  
12  
13  
14  
15  
16  
17  
18  
19  
20  
21  
22  
23  
24  
25  
26  
27  
28  
29  
30  
31  
32  
33  
34  
35  
36  
37  
38  
39  
40  
41  
42  
43  
44  
45  
46  
47  
48  
49

|  |                                                                                                                        |  |  |  |  |
|--|------------------------------------------------------------------------------------------------------------------------|--|--|--|--|
|  | Mean diabetes duration 7.4<br><b>Practitioner and practice participants</b><br>From 44 practices from four UK regions. |  |  |  |  |
|--|------------------------------------------------------------------------------------------------------------------------|--|--|--|--|

**Glossary of abbreviations:**

ACR (albumin-creatinine ratio), AqoL (assessment of quality of life), ATSM (automated telephone self management support) , BMI (body mass index), BP (blood pressure), CDSMP (chronic disease self-management program) , CO (coach-only), CPDS (coach primary care provider portal with decision support), CPP (coach primary care physician portal), CSQ8 (client satisfaction scale 8), DBP (diastolic blood pressure), DMSES (diabetes management self efficacy scale) , DQOL (diabetes quality of life measure), ED (emergency department), eGFR (estimated glomerular filtration rate), FI (financial incentivisation), GMV (group medical visits), GWB (blobal well being), LDL (low density lipoproetin), MAI (medication appropriate index), MARS (medication adherence rating scale), MCS-12 (mental component summary score), NR (not recorded), PACIC (Patient assessment of chronic illness care), PAID (problems areas in diabetes scale), PDA (personal digital assistant), PHQ-9 (patient health questionnaire 9), PM (peer mentoring), SBP (systolic blood pressure), SDSCA (summary of diabetes self-care behaviours scale), SF-12 (short Form general health survey), T2DM (type 2 diabetes mellitus), TOFHLA (test of functional health literacy for adults), VA (veteran’s affairs), WHO (World Health Organisation).

1  
2  
3  
4 Interventions were all complex with multiple components. Studies were categorised  
5 based on the predominant intervention element using the EPOC taxonomy. The  
6 included interventions were categorised as predominantly patient-centred (n=20,  
7 48%); organisational (n=20, 48%), financial (n=1, 2%) or professional (n=1, 2%). One  
8 study (Long et al. 2012) comprised two intervention arms with a patient-centred and  
9 financial intervention (included as a patient-centred predominant intervention in our  
10 analysis). Descriptions of the interventions are outlined in *Table 1*.

11  
12  
13  
14  
15  
16  
17  
18 The twenty patient-centred interventions in our review included four telephone- (34,  
19 41, 56, 58), five computerised/ mobile phone based- (32, 36, 52, 61, 68), one video-  
20 based- (51), five peer-support- (30, 38, 44, 49, 65), three self-monitoring-based (37,  
21 50, 64) and two-culturally-supportive self-management interventions (39, 45). The  
22 twenty organisational interventions included five pharmacist interventions  
23 performing case management (35, 40, 47, 48, 57), six nurse case management  
24 interventions (23, 31, 46, 53, 55, 60), three web-based/ telemedicine/ telephone  
25 case management interventions (24, 59, 63), three new-clinic-based interventions  
26 (43, 54, 66), one community health-worker intervention (62), one psychological  
27 intervention (22) and one lay health worker intervention (67). Eight interventions  
28 had an mHealth or telehealth component (33, 36, 45, 52, 56, 59, 65, 68). More  
29 detailed descriptions of the interventions are outlined in *Appendix 3*.

### 30 31 32 33 34 35 36 37 38 39 40 41 42 43 44 45 46 47 48 49 50 51 52 53 54 55 56 57 58 59 60

#### *Risk of bias*

All 42 studies were RCTs, with six being cluster RCTs. Overall, 25 studies were  
classified as having a predominant low-risk of bias (59.5%) (22-24, 32-36, 39, 41, 42,  
45, 46, 51, 53-55, 58, 59, 62-66, 68), thirteen studies had an unclear-risk (31%) (30,  
31, 37, 38, 40, 44, 47, 49, 56, 57, 60, 61, 67) and four RCTs were classified as having a  
high-risk of bias (9.5%) (43, 48, 50, 52) (*Appendix 4*). Blinding of outcome assessment  
was classified as low-risk in all studies. Attrition bias was evident in seven studies.  
*Appendix 5* outlines the summary judgements for both overall risk of bias and  
predominant intervention type, which were used in the meta-regression analysis.

There was no evidence of publication bias in the studies included in the HbA1c (p



1  
2  
3 =0.37) or SPB analysis ( $p=0.54$ ). However, there was some evidence of publication  
4 bias in the studies included in the DBP analysis ( $p < 0.01$ ). See *Appendix 6*.

### 7 8 *Primary outcomes*

#### 10 HbA1c

11  
12 Overall 40 of the 42 studies were included in a meta-analysis, which found a mean  
13 difference (MD) in HbA1c of -3.7 mmol/mol (-0.34%; 95% CI: -0.46%, -0.22%)  
14 favouring intervention groups, but with statistical heterogeneity ( $I^2 = 69%$ ). *Figure*  
15 *2(a)* outlines the overall effect of interventions on HbA1c, across EPOC categories.

16  
17  
18  
19  
20  
21 Subgroup analyses were performed based upon the predominant intervention type  
22 (*Figure 2(a)*), the baseline HbA1c level (*Figure 2(b)*), study quality (*Figure 2(c)*) and  
23 study duration (*Figure 2(d)*). These analyses suggested that organisational  
24 interventions (MD in HbA1c of -5.2 mmol/mol (-0.42%; 95% CI: -0.66%, -0.18%;  $I^2 =$   
25 79%) had better improvements in HbA1c than patient-centred interventions (-0.30%;  
26 95% CI: -0.43%, -0.18%;  $I^2 = 48%$ ) ( $p=0.05$ ). Similarly interventions performed when  
27 the baseline population-HbA1c was over 80mmol/mol (9.5%) (MD in HbA1c of -6.3  
28 mmol/mol (-0.58%; 95% CI: -0.81%, -0.35%;  $I^2 = 75%$ ) had better improvements in  
29 HbA1c than populations with a baseline-HbA1c  $< 9.5%$  (-0.17%; 95% CI: -0.29%, -  
30 0.05%;  $I^2 = 51%$ ) ( $p=0.002$ ). Studies with a low-risk of bias (MD in HbA1c was -2.8  
31 mmol/mol (-0.26%; 95% CI: -0.39%, -0.13%;  $I^2 = 59%$ ) appeared to have a smaller  
32 reduction in HbA1c compared to unclear (-0.49%; 95% CI: -0.84%, -0.15%;  $I^2 =$   
33 81%) and high-risk studies (-0.41%; 95% CI: -0.74%, -0.09%;  $I^2 = 61%$ ), but there was  
34 no evidence of a statistically significant difference ( $p=0.35$ ). Lastly, study duration did  
35 not appear to affect HbA1c (*Figure 2(d)*). Though not considered in our original  
36 protocol, subgroup analysis did not highlight additional benefit from those  
37 interventions (included in both organisational and patient-centred intervention  
38 types), which had a telemedicine or mHealth component (*Appendix 7*) (33, 36, 45,  
39 52, 56, 59, 65, 68).

40  
41  
42  
43  
44  
45  
46  
47  
48  
49  
50  
51  
52  
53  
54  
55  
56 As the overall results showed statistical heterogeneity, meta-regression analysis was  
57 also conducted to explore the components of this heterogeneity. As with the meta-  
58  
59  
60

1  
2  
3 analyses, higher baseline HbA1c was associated with a greater reduction in HbA1c  
4 ( $\beta$ -Coefficient: -0.27; 95% CI: -0.41, -0.13;  $p < 0.001$ ). The predominant-intervention  
5 type, risk of bias and study-duration were not associated with improved glycaemic  
6 control.  
7  
8  
9

### 10 11 Blood pressure

12  
13 Overall there was small improvement in SBP in the twenty-six interventions included  
14 in the meta-analysis, (MD SBP – 1.13 mmHg (95% CI -2.19, -0.08)) with moderate  
15 heterogeneity ( $I^2 = 47%$ ) (*Appendix 8*) (22-24, 30-36, 38, 39, 41, 45, 46, 48-51, 54, 58-  
16 60, 62, 65, 66, 68). DBP improved modestly in the twenty-two studies included in the  
17 meta-analysis (MD DBP – 1.37mmHg (95% CI -2.25, -0.50)) with moderate  
18 heterogeneity ( $I^2 = 44%$ ) (*Appendix 9*) (22-24, 31, 32, 34-36, 38, 39, 41, 45, 46, 48, 49,  
19 51, 54, 58, 59, 62, 65, 66, 68).  
20  
21

22  
23 In the subgroup analysis, organisational interventions appeared to improve SBP  
24 modestly (MD SBP: – 2.69mmHg; 95% CI: -5.11, -0.26;  $I^2 = 57%$ ) compared to patient-  
25 centred interventions (MD SBP: – 0.52mmHg; 95% CI: -1.41, 0.38;  $I^2 = 20%$ ) which  
26 showed no statistically significant improvement (*Appendix 8*). However, there was  
27 no evidence of a statistically significant difference between intervention types.  
28 Similarly with DBP, organisational interventions appeared to improve DBP modestly  
29 (MD DBP: -2.87mmHg; 95% CI: -4.29, -1.45;  $I^2 = 30%$ ) compared to patient-centred  
30 interventions (MD DBP: -1.37mmHg; 95% CI: -1.42, 0.2;  $I^2 = 30%$ ) (*Appendix 9*) and  
31 there was evidence of a statistically significant difference ( $p = 0.007$ ). Meta-regression  
32 analysis was not conducted for SBP or DBP as significant heterogeneity was not  
33 present on the overall effect sizes.  
34  
35  
36  
37  
38  
39  
40  
41  
42  
43  
44  
45  
46

### 47 Lipids

48  
49 Twenty of the 42 studies reported total cholesterol, LDL-cholesterol, HDL-cholesterol  
50 or triacylglycerides (23, 24, 30-32, 35, 36, 38, 39, 41, 45, 46, 48, 51, 56, 58, 62, 65, 66,  
51 68). Statistically significant improvements in lipids were only demonstrated in four of  
52 these 20 studies (31, 32, 45, 48). Baseline lipid levels were generally not reported.  
53  
54 Eleven of the twenty studies reported data relating to total cholesterol. Meta-  
55  
56  
57  
58  
59  
60

1  
2  
3 analysis was undertaken on these studies, which indicated a modest improvement in  
4 total cholesterol, favouring intervention groups (MD Total Cholesterol – 4.29 mg/dl  
5 (95% CI -7.68, -0.89);  $I^2 = 0\%$ ) (*Appendix 10*) (35, 36, 38, 41, 45, 46, 58, 62, 65, 66, 68).  
6  
7

### 8 9 *Secondary outcomes*

10  
11 All but one the 42 included studies reported at least one of the eligible secondary  
12 outcomes (*Appendix 11*). Overall, interventions had very limited effect on secondary  
13 outcomes. Twenty-six studies reported other physical outcomes (e.g. BMI, and  
14 estimated glomerular filtration rate). Of the fifteen studies that reported on weight  
15 or BMI, only one showed significant improvement (56). Ten studies reported mental  
16 health outcomes (36, 38, 41, 45, 58, 59, 64) with two showing a significant  
17 improvement in the Change Mental Component Summary Score and the Short Form-  
18 12 Mental Health Score (64, 67). Twenty-eight studies reported PROMs, eleven  
19 showing an improvement with the intervention. Ten studies reported medication  
20 adherence outcomes, two showing improvement. Eighteen studies reported  
21 utilisation outcomes with four improving processes of care.  
22  
23  
24  
25  
26  
27  
28  
29  
30  
31  
32  
33  
34

## 35 **Discussion**

### 36 37 *Statement of principle findings*

38  
39 Healthcare interventions have positive, albeit modest, effects on HbA1c in poorly  
40 controlled T2DM. Interventions targeting those with a higher baseline HbA1c ( $\geq 80$   
41 mmol/mol (9.5%)) show the greatest effects. There was also evidence of a modest  
42 impact on both blood pressure and lipids, though baseline control of these risk  
43 factors was generally good. Generally little effect on secondary outcomes was found.  
44 Our results suggest that a targeted approach to T2DM management, focussing on  
45 individuals with very poor glycaemic control, may represent a prudent strategy for  
46 future management.  
47  
48  
49  
50  
51  
52  
53  
54

### 55 56 *Strengths and weaknesses of the study*

57  
58  
59  
60

1  
2  
3 The methodology of our systematic review addresses key credibility issues (69, 70).  
4 The research question was sensible, our search of the literature was exhaustive and  
5 our results are outlined clearly for primary and secondary outcomes. The effect of  
6 baseline HbA1c was consistent across studies, biologically plausible and was an a  
7 priori hypothesis (70).  
8  
9  
10

11  
12  
13 We performed meta-regression to explore the heterogeneity, which also confirmed  
14 the increased effectiveness of interventions on those with HbA1c  $\geq$  80 mmol/mol  
15 (9.5%). However, a major limitation is that meta-regression is usually underpowered  
16 to detect anything but very large associations. Meta-regression considers the  
17 interactions between trial level covariates and the treatment effect, but it inherits  
18 difficulties of interpretation attached to non-randomised studies, as it is not possible  
19 to randomise patients to one covariate value or another, so causality cannot be  
20 attached its findings (71). Though we do not believe the subgroup findings occurred  
21 by chance, there remained high heterogeneity and we explored between-study  
22 comparisons rather than within-study comparisons (70). There was some evidence  
23 of publication bias in the DBP analysis, but this was not present for the twenty-two  
24 studies reporting SBP. It should also be noted that the power of Egger's test is low  
25 when the number of studies is small and should only be used if the analysis includes  
26 a range of study sizes.  
27  
28  
29  
30  
31  
32  
33  
34  
35  
36  
37  
38  
39

40 This study will inform researchers regarding the range of interventions that have  
41 been deployed to target patients with poorly controlled T2DM. There is no specific  
42 definition for 'poor control' of T2DM in the literature, but by including all studies  
43 that had patients with a HbA1c  $>$  59 mmol/mol (7.5%), we captured the full range of  
44 poor glycaemic control. Studies examining poor control of HbA1c possess a risk of  
45 regression towards the mean. However, all included studies were RCTs with control  
46 groups, which should have accounted for this. Targeted interventions in poorly  
47 controlled T2DM need to be distinguished from interventions, which are designed to  
48 intensively reduce HbA1c in all patients. Though persons with very poor glycaemic  
49 control are also at risk of the adverse effects of hypoglycaemic agents, targeting this  
50 population is more likely to reach the right balance of reducing harms of  
51  
52  
53  
54  
55  
56  
57  
58  
59  
60

1  
2  
3 overtreatment and maximising potential benefits (18). The relative importance of  
4 targeting glycaemic or cardiovascular risk has been debated in the literature (17).  
5  
6 We did not account for medication use in the studies, but given that all included  
7  
8 studies were RCTs, which would balance out delivery of medications, we think that  
9  
10 differences relating to underlying medication usage relate to how different  
11  
12 interventions types promote the intensification of medications.  
13

### 14 15 *Comparison with other studies* 16

17  
18 The existing literature examining healthcare interventions to improve glycaemic  
19  
20 control has focussed on a range of approaches. There have been systematic reviews  
21  
22 of interventions including QI initiatives, education, self-management support, case-  
23  
24 management, adherence to medication and professional interventions, though as  
25  
26 outlined previously most have not specifically targeted patients with poor glycaemic  
27  
28 control (8, 10, 11).  
29

30  
31 A synthesis of 27 systematic reviews and 347 randomised controlled trials identified  
32  
33 the cost-effectiveness of self-management interventions in T2DM in all patients with  
34  
35 T2DM (72). This overview included studies that targeted all patients with T2DM and  
36  
37 found very good evidence that education improves blood glucose control in patients  
38  
39 with T2DM in the short term (less than 12 months) and that behavioural and  
40  
41 psychological interventions are associated with modest improvements in blood  
42  
43 glucose control (HbA1C) (72, 73). A review of computer-based diabetes self-  
44  
45 management interventions to manage T2DM reported a small beneficial effect on  
46  
47 blood glucose control (MD of -0.2%) (74). Another recent systematic review of 118  
48  
49 self-management interventions found improvements in HbA1c in 62% of studies. The  
50  
51 overall mean effect was to reduce HbA1c by -0.57%, although patients with  
52  
53 persistently elevated HbA1c over 9 had greater improvements (75). In our review,  
54  
55 patient-orientated interventions, such as self-monitoring of blood glucose and self-  
56  
57 management interventions, seemed to be less effective than organisational  
58  
59 interventions.  
60

61  
62 Case management by nurses and other professionals and case management in

1  
2  
3 socially disadvantaged have been shown to be beneficial when targeted at all  
4 patients with T2DM and our review supports this conclusion for poorly-controlled  
5 populations (5, 76-78). Pharmacist-based interventions have been studied, mainly in  
6 outpatient settings or in US primary care, and have been found to be effective and  
7 cost-effective (79, 80). The five pharmacist interventions in our review, targeting  
8 patients with poorly-controlled T2DM, showed mixed results, but overall had  
9 predominantly positive effects on HbA1c.

10  
11  
12 Attention to, and reporting of, intensification of anti-diabetic medications and  
13 patient's adherence to treatment regimens are needed to achieve optimal glycaemic  
14 control (81, 82). Evidence regarding adherence in T2DM is mixed. A previous  
15 systematic review of twenty one studies that included fourteen RCTs to enhance  
16 T2DM treatment adherence in community and hospital settings found that few  
17 studies measured or assessed adherence and that interventions to improve  
18 adherence did not show benefits or harms (83). A review by Farmer et al. found  
19 limited evidence of effect for interventions promoting the monitoring of medication  
20 use and brief messaging to support medication adherence in patients with T2DM,  
21 though the included studies did not specifically target patients with poorly controlled  
22 diabetes (84). Only ten of the 42 included studies in our review looked at adherence  
23 to medications as an outcome and only two of these nine studies had a statistically  
24 significant effect on adherence (49, 62). The baseline level of adherence varied  
25 considerably and studies used different scale ranges.

26  
27  
28 Our review identified only one professional-based interventions in poorly controlled  
29 T2DM, through a physician decision aid (42). Two systematic reviews have examined  
30 the impact of clinical decision support systems (CDSS) on the management of T2DM  
31 in primary care, between them looking at twenty eight trials, with varying results but  
32 none of these CDSS interventions were designed to promote intensification of  
33 prescribing in persons with poor glycaemic control (85, 86).

34  
35  
36  
37  
38  
39  
40  
41  
42  
43  
44  
45  
46  
47  
48  
49  
50  
51  
52  
53  
54  
55  
56  
57  
58  
59  
60  
*Future research*

1  
2  
3 There is a need for further research examining professional-based interventions in  
4 poorly controlled T2DM, such as CDSS, which promote intensification of medications  
5 (81). Studies from jurisdictions outside North America on poorly controlled  
6 populations would also be welcome. An individual patient data meta-analysis would  
7 answer further questions not possible in this review and future research should  
8 attempt to obtain individual-level patient data. It is likely that most successful  
9 interventions have their impact as a result of intensification of medicines and/ or  
10 improving adherence to medicines (81). As adherence was not measured in most of  
11 the studies and intensification poorly documented, it is important that future  
12 interventions report on these findings. Furthermore organisational interventions  
13 could incur significant costs to a health system so cost-effectiveness analyses on  
14 future interventions should be undertaken to ensure the modest improvements in  
15 HbA1c are beneficial for the health systems.  
16  
17  
18  
19  
20  
21  
22  
23  
24  
25  
26  
27

28 In conclusion, clinicians and policy makers, when considering organisation of care for  
29 T2DM should focus their effects on those patients with very poor glycaemic control  
30 ( $\geq 80$  mmol/mol (9.5%)). Prioritising interventions that emphasise structured  
31 organisation of care, which can include intensification and adherence to  
32 medications, also seem more likely to deliver optimal results in terms of glycaemic  
33 control for T2DM patients.  
34  
35  
36  
37  
38  
39  
40

#### 41 **Acknowledgements**

42  
43  
44 Nil  
45  
46  
47  
48

#### 49 **Keywords**

50 BMI- body mass index

51 CBAs- controlled before and after studies

52 CCTs- controlled clinical trials

53 CDSS- clinical decision support system  
54  
55  
56  
57  
58  
59  
60

1  
2  
3 CI- confidence interval

4 DBP- diastolic blood pressure

5 EPOC- Effective Practice and Organisation of Care

6  
7 HCP- health care professional

8 HDL- high density lipoprotein

9 ITS- interrupted time series analyses

10 LDL- high density lipoprotein

11 MD- mean difference

12 PRISMA- Preferred Reporting Items for Systematic Reviews and Meta-Analyses

13 PROM- patient reported outcome measure

14 PROSPERO- international prospective register of systematic reviews

15 QI- quality improvement

16 RCT- randomised controlled trials

17 SBP- systolic blood pressure

18 T2DM- type 2 diabetes mellitus



## References

1. Wild S, Roglic G, Green A, et al. Global prevalence of diabetes: estimates for the year 2000 and projections for 2030. *Diabetes Care*. 2004;27(5):1047-53.
2. Spann SJ, Nutting PA, Galliher JM, et al. Management of type 2 diabetes in the primary care setting: a practice-based research network study. *Ann Fam Med*. 2006;4(1):23-31.
3. Campbell DJ, McGrady M, Prior DL, et al. Most individuals with treated blood pressures above target receive only one or two antihypertensive drug classes. *Intern Med J*. 2013;43(2):137-43.
4. Stratton IM, Adler AI, Neil HA, et al. Association of glycaemia with macrovascular and microvascular complications of type 2 diabetes (UKPDS 35): prospective observational study. *Bmj*. 2000;321(7258):405-12.
5. Stelfox M, Dipnarine K, Stopka C. The chronic care model and diabetes management in US primary care settings: a systematic review. *Prev Chronic Dis*. 2013;10:E26.
6. Mays N. Reducing unwarranted variations in healthcare in the English NHS. *Bmj*. 2011;342:d1849.
7. Simmons RK, Carlsen AH, Griffin SJ, et al. Variation in prescribing of lipid-lowering medication in primary care is associated with incidence of cardiovascular disease and all-cause mortality in people with screen-detected diabetes: findings from the ADDITION-Denmark trial. *Diabet Med*. 2014.
8. Seitz P, Rosemann T, Gensichen J, Huber CA. Interventions in primary care to improve cardiovascular risk factors and glycated haemoglobin (HbA1c) levels in patients with diabetes: a systematic review. *Diabetes Obes Metab*. 2011;13(6):479-89.
9. Renders CM, Valk GD, Griffin SJ, et al. Interventions to improve the management of diabetes in primary care, outpatient, and community settings: a systematic review. *Diabetes Care*. 2001;24(10):1821-33.
10. Seidu S, Walker NS, Bodicoat DH, et al. A systematic review of interventions targeting primary care or community based professionals on cardio-metabolic risk factor control in people with diabetes. *Diabetes Res Clin Pract*. 2016;113:1-13.

11. Tricco AC, Ivers NM, Grimshaw JM, et al. Effectiveness of quality improvement strategies on the management of diabetes: a systematic review and meta-analysis. *Lancet*. 2012;379(9833):2252-61.
12. Patel A, MacMahon S, Chalmers J, et al. Intensive blood glucose control and vascular outcomes in patients with type 2 diabetes. *N Engl J Med*. 2008;358(24):2560-72.
13. Gerstein HC, Miller ME, Byington RP, et al. Effects of intensive glucose lowering in type 2 diabetes. *N Engl J Med*. 2008;358(24):2545-59.
14. Duckworth W, Abraira C, Moritz T, et al. Glucose control and vascular complications in veterans with type 2 diabetes. *N Engl J Med*. 2009;360(2):129-39.
15. Turnbull FM, Abraira C, Anderson RJ, et al. Intensive glucose control and macrovascular outcomes in type 2 diabetes. *Diabetologia*. 2009;52(11):2288-98.
16. Skyler JS, Bergenstal R, Bonow RO, et al. Intensive glycemic control and the prevention of cardiovascular events: implications of the ACCORD, ADVANCE, and VA Diabetes Trials: a position statement of the American Diabetes Association and a Scientific Statement of the American College of Cardiology Foundation and the American Heart Association. *J Am Coll Cardiol*. 2009;53(3):298-304.
17. Hayward RA, Reaven PD, Wiitala WL, et al. Follow-up of glycemic control and cardiovascular outcomes in type 2 diabetes. *N Engl J Med*. 2015;372(23):2197-206.
18. Hayward RA. Excessive testing of adults with type 2 diabetes. *Bmj*. 2015;351:h6549.
19. Mossello E. Targeting Vascular Risk Factors in Older Adults: From Polypill to Personalized Prevention. *JAMA Intern Med*. 2015;175(12):1949-50.
20. Murphy M, Galvin R, Fahey T, Smith S. Effectiveness of interventions in primary care to improve glycosylated haemoglobin (HbA1c) and cardiovascular risk factor levels in patients with poorly-controlled type 2 diabetes mellitus: a systematic review. PROSPERO. 2014;CRD42014014442.
21. Effective Practice and Organisation of Care. EPOC Intervention types. Norwegian Knowledge Centre for the Health Services. 2015;Accessed on 13th April 2016: [https://epoc.cochrane.org/sites/epoc.cochrane.org/files/uploads/EPOC\\_Taxonomy\\_of\\_Interventions\\_2002.pdf](https://epoc.cochrane.org/sites/epoc.cochrane.org/files/uploads/EPOC_Taxonomy_of_Interventions_2002.pdf).

- 1
- 2
- 3 22. Keogh KM, Smith SM, White P, et al. Psychological family intervention for
- 4 poorly controlled type 2 diabetes. *Am J Manag Care*. 2011;17(2):105-13.
- 5
- 6 23. Krein SL, Klamerus ML, Vijan S, et al. Case management for patients with
- 7 poorly controlled diabetes: a randomized trial. *Am J Med*. 2004;116(11):732-9.
- 8
- 9
- 10 24. McMahon GT, Gomes HE, Hohne SH, et al. Web-based care management in
- 11 patients with poorly controlled diabetes. *Diabetes Care*. 2005;28(7):1624-9.
- 12
- 13 25. Vanselow NA, Donaldson MS, Yordy KD. A new definition of primary care.
- 14 *Jama*. 1995;273(3):192.
- 15
- 16
- 17 26. Effective Practice and Organisation of Care (EPOC). Summary assessments of
- 18 the risk of bias. EPOC Resources for review authors Oslo: Norwegian Knowledge
- 19 Centre for the Health Services.2013 [Available from: Accessed on 13th April 2016
- 20 [http://epoc.cochrane.org/sites/epoc.cochrane.org/files/uploads/16\\_Summary](http://epoc.cochrane.org/sites/epoc.cochrane.org/files/uploads/16_Summary_assessments_of_the_risk_of_bias_2013_08_12_2.pdf)
- 21 [assessments\\_of\\_the\\_risk\\_of\\_bias\\_2013\\_08\\_12\\_2.pdf](http://epoc.cochrane.org/sites/epoc.cochrane.org/files/uploads/16_Summary_assessments_of_the_risk_of_bias_2013_08_12_2.pdf).
- 22
- 23
- 24
- 25
- 26 27. StataCorp. Stata Statistical Software: Release 13. College Station, TX:
- 27 StataCorp LP; 2013.
- 28
- 29 28. Higgins J, Thompson S. Quantifying heterogeneity in a meta-analysis. *Stat*
- 30 *Med*. 2002;21:1539-58.
- 31
- 32 29. Thompson SG, Higgins JP. How should meta-regression analyses be
- 33 undertaken and interpreted? *Stat Med*. 2002;21(11):1559-73.
- 34
- 35 30. Thom DH, Ghorob A, Hessler D, et al. Impact of peer health coaching on
- 36 glycemic control in low-income patients with diabetes: a randomized controlled trial.
- 37 *Ann Fam Med*. 2013;11(2):137-44.
- 38
- 39 31. Taylor CB, Miller NH, Reilly KR, et al. Evaluation of a nurse-care management
- 40 system to improve outcomes in patients with complicated diabetes. *Diabetes Care*.
- 41 2003;26(4):1058-63.
- 42
- 43 32. Tang PC, Overhage JM, Chan AS, et al. Online disease management of
- 44 diabetes: Engaging and motivating patients online with enhanced resources-diabetes
- 45 (EMPOWER-D), a randomized controlled trial. *J Am Med Inform Assoc*.
- 46 2013;20(3):526-34.
- 47
- 48 33. Sen AP, Sewell TB, Riley EB, et al. Financial incentives for home-based health
- 49 monitoring: a randomized controlled trial. *J Gen Intern Med*. 2014;29(5):770-7.
- 50
- 51
- 52
- 53
- 54
- 55
- 56
- 57
- 58
- 59
- 60

- 1  
2  
3 34. Schillinger D, Handley M, Wang F, Hammer H. Effects of Self-Management  
4 Support on Structure, Process, and Outcomes Among Vulnerable Patients With  
5 Diabetes A three-arm practical clinical trial. *Diabetes Care*. 2009;32(4):559-66.  
6  
7  
8 35. Rothman RL, Malone R, Bryant B, et al. A randomized trial of a primary care-  
9 based disease management program to improve cardiovascular risk factors and  
10 glycated hemoglobin levels in patients with diabetes. *Am J Med*. 2005;118(3):276-84.  
11  
12 36. Quinn CC, Shardell MD, Terrin ML, et al. Cluster-randomized trial of a mobile  
13 phone personalized behavioral intervention for blood glucose control. *Diabetes Care*.  
14 2011;34(9):1934-42.  
15  
16 37. Polonsky WH, Fisher L, Schikman CH, et al. A structured self-monitoring of  
17 blood glucose approach in type 2 diabetes encourages more frequent, intensive, and  
18 effective physician interventions: results from the STeP study. *Diabetes Technol*  
19 *Ther*. 2011;13(8):797-802.  
20  
21 38. Philis-Tsimikas A, Fortmann A, Lleba-Ocana L, et al. Peer-Led Diabetes  
22 Education Programs in High-Risk Mexican Americans Improve Glycemic Control  
23 Compared With Standard Approaches A Project Dulce promotora randomized trial.  
24 *Diabetes Care*. 2011;34(9):1926-31.  
25  
26 39. Palmas W, Findley SE, Mejia M, et al. Results of the northern Manhattan  
27 diabetes community outreach project: a randomized trial studying a community  
28 health worker intervention to improve diabetes care in Hispanic adults. *Diabetes*  
29 *Care*. 2014;37(4):963-9.  
30  
31 40. Odegard PS, Goo A, Hummel J, et al. Caring for poorly controlled diabetes  
32 mellitus: a randomized pharmacist intervention. *Ann Pharmacother*. 2005;39(3):433-  
33 40.  
34  
35 41. Mons U, Raum E, Kramer HU, et al. Effectiveness of a Supportive Telephone  
36 Counseling Intervention in Type 2 Diabetes Patients: Randomized Controlled Study.  
37 *Plos One*. 2013;8(10).  
38  
39 42. Mathers N, Ng CJ, Campbell MJ, et al. Clinical effectiveness of a patient  
40 decision aid to improve decision quality and glycaemic control in people with  
41 diabetes making treatment choices: a cluster randomised controlled trial (PANDAs)  
42 in general practice. *BMJ Open*. 2012;2(6).  
43  
44  
45  
46  
47  
48  
49  
50  
51  
52  
53  
54  
55  
56  
57  
58  
59  
60

- 1  
2  
3 43. Maislos M, Weisman D. Multidisciplinary approach to patients with poorly  
4 controlled type 2 diabetes mellitus: a prospective, randomized study. *Acta Diabetol.*  
5 2004;41(2):44-8.  
6  
7  
8 44. Long JA, Jahnle EC, Richardson DM, et al. Peer mentoring and financial  
9 incentives to improve glucose control in African American veterans: a randomized  
10 trial. *Ann Intern Med.* 2012;156(6):416-24.  
11  
12 45. Kim MT, Han HR, Song HJ, et al. A community-based, culturally tailored  
13 behavioral intervention for Korean Americans with type 2 diabetes. *Diabetes Educ.*  
14 2009;35(6):986-94.  
15  
16 46. Jovanovic L, Cali Medi-Cal type2 Diabet Stu G. Closing the gap: Effect of  
17 diabetes case management on glycemic control among low-income ethnic minority  
18 populations - The California Medi-Cal type 2 diabetes study. *Diabetes Care.*  
19 2004;27(1):95-103.  
20  
21 47. Jameson JP, Baty PJ. Pharmacist collaborative management of poorly  
22 controlled diabetes mellitus: a randomized controlled trial. *Am J Manag Care.*  
23 2010;16(4):250-5.  
24  
25 48. Jacobs M, Sherry PS, Taylor LM, et al. Pharmacist Assisted Medication  
26 Program Enhancing the Regulation of Diabetes (PAMPERED) study. *J Am Pharm*  
27 *Assoc (2003).* 2012;52(5):613-21.  
28  
29 49. Heisler M, Vijan S, Makki F, Piette JD. Diabetes control with reciprocal peer  
30 support versus nurse care management: a randomized trial. *Ann Intern Med.*  
31 2010;153(8):507-15.  
32  
33 50. Guerci B, Drouin P, Grange V, et al. Self-monitoring of blood glucose  
34 significantly improves metabolic control in patients with type 2 diabetes mellitus: the  
35 Auto-Surveillance Intervention Active (ASIA) study. *Diabetes Metab.* 2003;29(6):587-  
36 94.  
37  
38 51. Frosch DL, Uy V, Ochoa S, Mangione CM. Evaluation of a behavior support  
39 intervention for patients with poorly controlled diabetes. *Arch Intern Med.*  
40 2011;171(22):2011-7.  
41  
42 52. Forjuoh SN, Bolin JN, Huber Jr JC, et al. Behavioral and technological  
43 interventions targeting glycemic control in a racially/ethnically diverse population: A  
44 randomized controlled trial. *BMC Public Health.* 2014;14(1).  
45  
46  
47  
48  
49  
50  
51  
52  
53  
54  
55  
56  
57  
58  
59  
60

- 1  
2  
3 53. Farmer A, Hardeman W, Hughes D, et al. An explanatory randomised  
4 controlled trial of a nurse-led, consultation-based intervention to support patients  
5 with adherence to taking glucose lowering medication for type 2 diabetes. *Bmc*  
6 *Family Practice*. 2012;13.  
7  
8  
9  
10 54. Edelman D, Fredrickson SK, Melnyk SD, et al. Medical clinics versus usual care  
11 for patients with both diabetes and hypertension: a randomized trial. *Ann Intern*  
12 *Med*. 2010;152(11):689-96.  
13  
14  
15 55. DePue JD, Dunsiger S, Seiden AD, et al. Nurse-Community Health Worker  
16 Team Improves Diabetes Care in American Samoa Results of a randomized  
17 controlled trial. *Diabetes Care*. 2013;36(7):1947-53.  
18  
19  
20  
21 56. Dale J, Caramlau I, Sturt J, et al. Telephone peer-delivered intervention for  
22 diabetes motivation and support: The telecare exploratory RCT. *Patient Education*  
23 *and Counseling*. 2009;75(1):91-8.  
24  
25  
26 57. Choe HM, Mitrovich S, Dubay D, et al. Proactive case management of high-  
27 risk patients with type 2 diabetes mellitus by a clinical pharmacist: a randomized  
28 controlled trial. *Am J Manag Care*. 2005;11(4):253-60.  
29  
30  
31 58. Blackberry ID, Furler JS, Best JD, et al. Effectiveness of general practice based,  
32 practice nurse led telephone coaching on glycaemic control of type 2 diabetes: the  
33 Patient Engagement and Coaching for Health (PEACH) pragmatic cluster randomised  
34 controlled trial. *Bmj*. 2013;347:f5272.  
35  
36  
37 59. Crowley MJ, Edelman D, McAndrew AT, et al. Effectiveness of a scalable  
38 telemedicine intervention for veterans with persistent poor diabetes control.  
39 *Diabetes*. 2015;64:A80.  
40  
41  
42 60. Edelman D, Dolor RJ, Coffman CJ, et al. Nurse-Led Behavioral Management of  
43 Diabetes and Hypertension in Community Practices: A Randomized Trial. *J Gen Intern*  
44 *Med*. 2015;30(5):626-33.  
45  
46  
47 61. Capozza K, Woolsey S, Georgsson M, et al. Going mobile with diabetes  
48 support: a randomized study of a text message-based personalized behavioral  
49 intervention for type 2 diabetes self-care. *Diabetes spectrum* : a publication of the  
50 American Diabetes Association. 2015;28(2):83-91.  
51  
52  
53  
54  
55  
56  
57  
58  
59  
60

- 1  
2  
3 62. McDermott RA, Schmidt B, Preece C, et al. Community health workers  
4 improve diabetes care in remote Australian Indigenous communities: results of a  
5 pragmatic cluster randomized controlled trial. *BMC Health Serv Res.* 2015;15.  
6  
7  
8 63. O'Connor PJ, Schmittiel JA, Pathak RD, et al. Randomized trial of telephone  
9 outreach to improve medication adherence and metabolic control in adults with  
10 diabetes. *Diabetes Care.* 2014;37(12):3317-24.  
11  
12  
13 64. Sugiyama T, Steers WN, Wenger NS, et al. Effect of a community-based  
14 diabetes self-management empowerment program on mental health-related quality  
15 of life: a causal mediation analysis from a randomized controlled. *BMC Health Serv*  
16 *Res.* 2015;15.  
17  
18  
19 65. Anzaldo-Campos MC, Contreras S, Vargas-Ojeda A, et al. Dulce Wireless  
20 Tijuana: A Randomized Control Trial Evaluating the Impact of Project Dulce and  
21 Short-Term Mobile Technology on Glycemic Control in a Family Medicine Clinic in  
22 Northern Mexico. *Diabetes Technol Ther.* 2016;18(4):240-51.  
23  
24  
25 66. Basudev N, Crosby-Nwaobi R, Thomas S, et al. A prospective randomized  
26 controlled study of a virtual clinic integrating primary and specialist care for patients  
27 with Type 2 diabetes mellitus. *Diabetic Medicine.* 2016;33(6):768-76.  
28  
29  
30 67. Protheroe J, Rathod T, Bartlam B, et al. The Feasibility of Health Trainer  
31 Improved Patient Self-Management in Patients with Low Health Literacy and Poorly  
32 Controlled Diabetes: A Pilot Randomised Controlled Trial. *Journal of Diabetes*  
33 *Research.* 2016;2016.  
34  
35  
36 68. Wild SH, Hanley J, Lewis SC, et al. Supported Telemonitoring and Glycemic  
37 Control in People with Type 2 Diabetes: The Telescot Diabetes Pragmatic Multicenter  
38 Randomized Controlled Trial. *Plos Medicine.* 2016;13(7).  
39  
40  
41 69. Murad MH, Montori VM, Ioannidis JP, et al. How to read a systematic review  
42 and meta-analysis and apply the results to patient care: users' guides to the medical  
43 literature. *Jama.* 2014;312(2):171-9.  
44  
45  
46 70. Sun X, Ioannidis JP, Agoritsas T, et al. How to use a subgroup analysis: users'  
47 guide to the medical literature. *Jama.* 2014;311(4):405-11.  
48  
49  
50 71. Dias S, Sutton AJ, Welton NJ, Ades A. Heterogeneity: subgroups, meta-  
51 regression, bias and bias-adjustment. NICE Decision Support Unit Technical Support  
52 Document [Internet]. 2012.  
53  
54  
55  
56  
57  
58  
59  
60

- 1  
2  
3 72. Health and Information and Quality Authority. Health technology assessment  
4 of chronic disease self- management support interventions. 2015.  
5  
6 73. Ismail K, Winkley K, Rabe-Hesketh S. Systematic review and meta-analysis of  
7 randomised controlled trials of psychological interventions to improve glycaemic  
8 control in patients with type 2 diabetes. *Lancet*. 2004;363(9421):1589-97.  
9  
10 74. Pal K, Eastwood SV, Michie S, et al. Computer-based interventions to improve  
11 self-management in adults with type 2 diabetes: a systematic review and meta-  
12 analysis. *Diabetes Care*. 2014;37(6):1759-66.  
13  
14 75. Chryvala CA, Sherr D, Lipman RD. Diabetes self-management education for  
15 adults with type 2 diabetes mellitus: A systematic review of the effect on glycemic  
16 control. *Patient Educ Couns*. 2015.  
17  
18 76. Norris SL, Nichols PJ, Caspersen CJ, et al. The effectiveness of disease and  
19 case management for people with diabetes. A systematic review. *Am J Prev Med*.  
20 2002;22(4 Suppl):15-38.  
21  
22 77. Glazier RH, Bajcar J, Kennie NR, Willson K. A systematic review of  
23 interventions to improve diabetes care in socially disadvantaged populations.  
24 *Diabetes Care*. 2006;29(7):1675-88.  
25  
26 78. Saxena S, Misra T, Car J, et al. Systematic review of primary healthcare  
27 interventions to improve diabetes outcomes in minority ethnic groups. *J Ambul Care*  
28 *Manage*. 2007;30(3):218-30.  
29  
30 79. Wang Y, Yeo QQ, Ko Y. Economic evaluations of pharmacist-managed services  
31 in people with diabetes mellitus: a systematic review. *Diabet Med*. 2015.  
32  
33 80. Santschi V, Chiolero A, Paradis G, et al. Pharmacist interventions to improve  
34 cardiovascular disease risk factors in diabetes: a systematic review and meta-analysis  
35 of randomized controlled trials. *Diabetes Care*. 2012;35(12):2706-17.  
36  
37 81. Krass I, Schieback P, Dhippayom T. Adherence to diabetes medication: a  
38 systematic review. *Diabet Med*. 2015;32(6):725-37.  
39  
40 82. Cramer JA. A systematic review of adherence with medications for diabetes.  
41 *Diabetes Care*. 2004;27(5):1218-24.  
42  
43 83. Vermeire E, Wens J, Van Royen P, et al. Interventions for improving  
44 adherence to treatment recommendations in people with type 2 diabetes mellitus.  
45 *Cochrane Database Syst Rev*. 2005(2):Cd003638.  
46  
47  
48  
49  
50  
51  
52  
53  
54  
55  
56  
57  
58  
59  
60



1  
2  
3 84. Farmer AJ, McSharry J, Rowbotham S, et al. Effects of interventions  
4 promoting monitoring of medication use and brief messaging on medication  
5 adherence for people with Type 2 diabetes: a systematic review of randomized trials.  
6 Diabet Med. 2015.  
7  
8

9  
10 85. Cleveringa FG, Gorter KJ, van den Donk M, et al. Computerized decision  
11 support systems in primary care for type 2 diabetes patients only improve patients'  
12 outcomes when combined with feedback on performance and case management: a  
13 systematic review. Diabetes Technol Ther. 2013;15(2):180-92.  
14  
15

16  
17 86. Jeffery R, Iserman E, Haynes RB. Can computerized clinical decision support  
18 systems improve diabetes management? A systematic review and meta-analysis.  
19 Diabet Med. 2012;30(6):739-45.  
20  
21  
22  
23  
24  
25  
26  
27  
28  
29  
30  
31  
32  
33  
34  
35  
36  
37  
38  
39  
40  
41  
42  
43  
44  
45  
46  
47  
48  
49  
50  
51  
52  
53  
54  
55  
56  
57  
58  
59  
60

Figure 1: PRISMA Flow Sheet

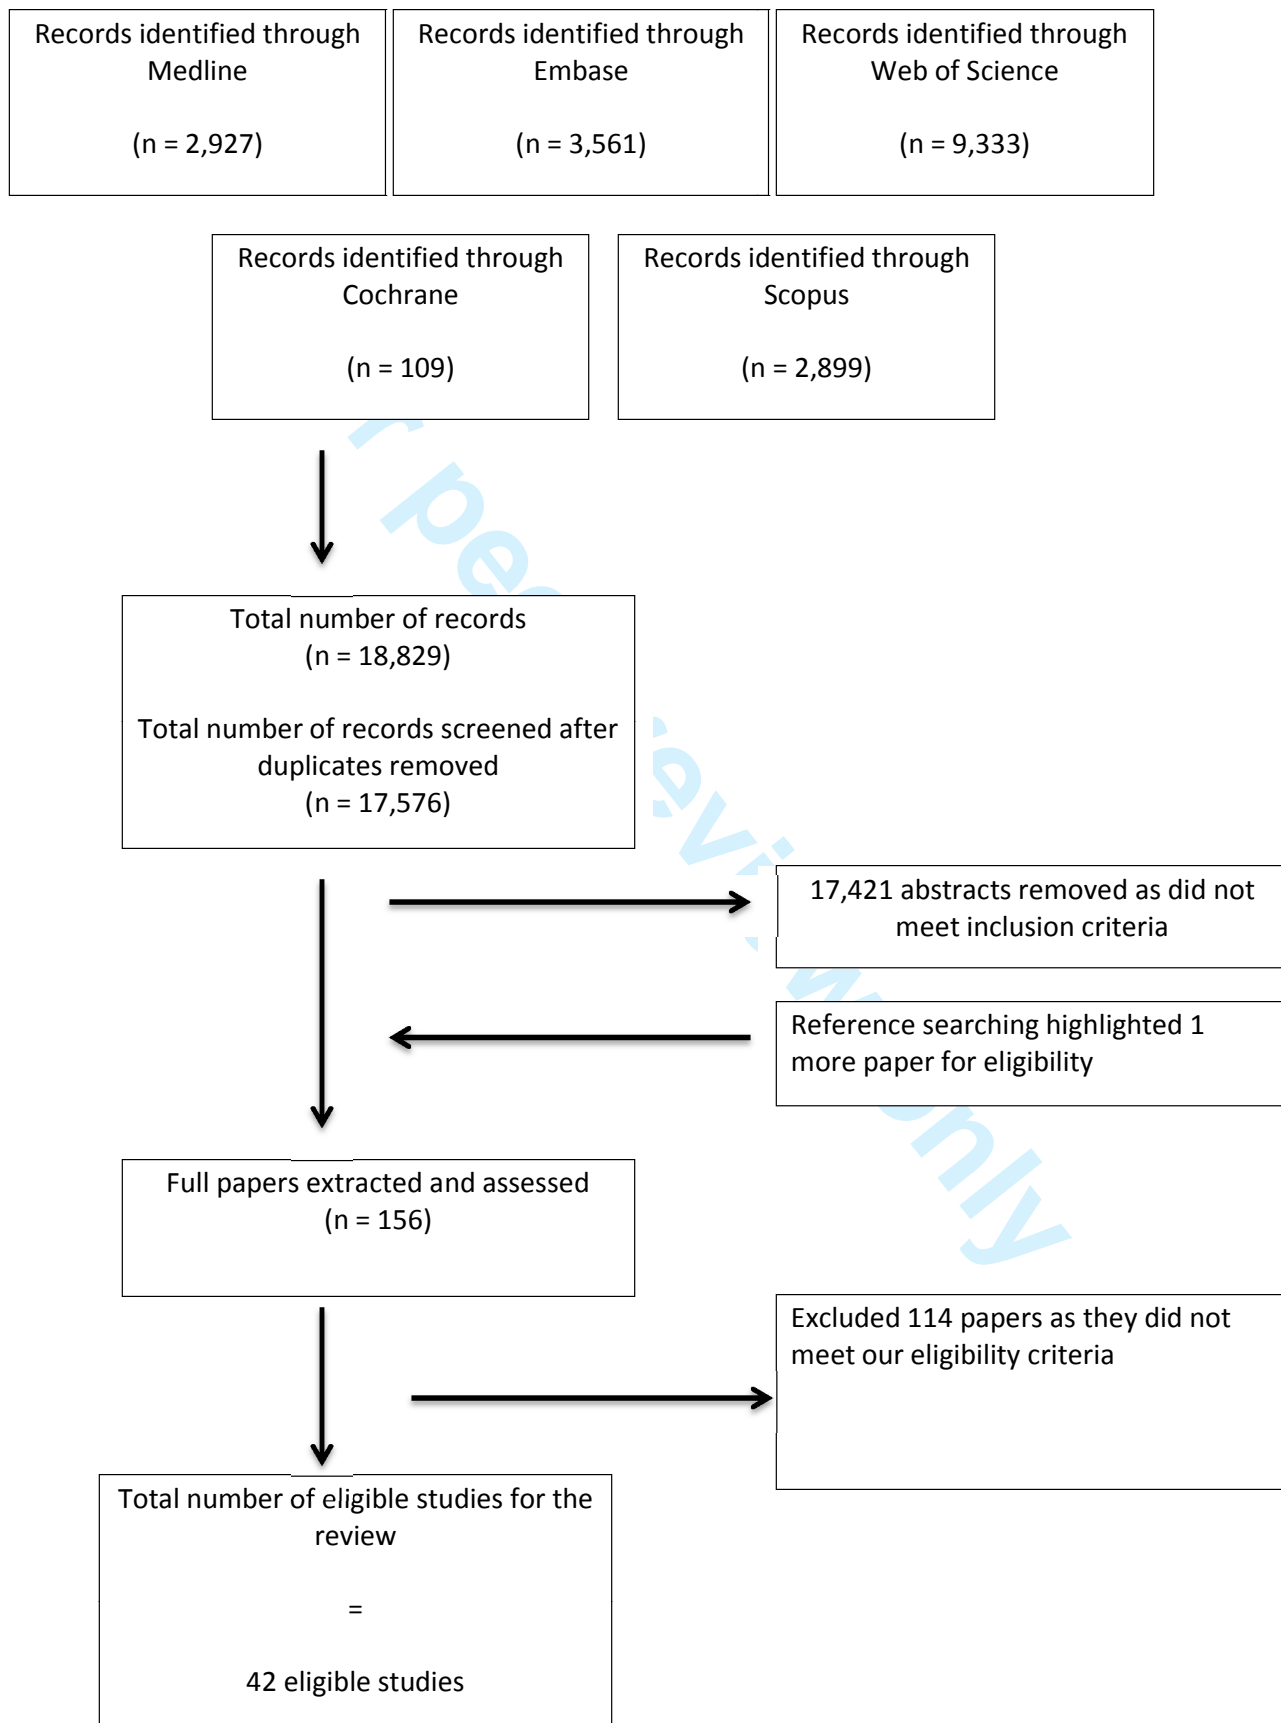

Figure 2a: Effects of interventions on HbA1c, with intervention-type subgroups

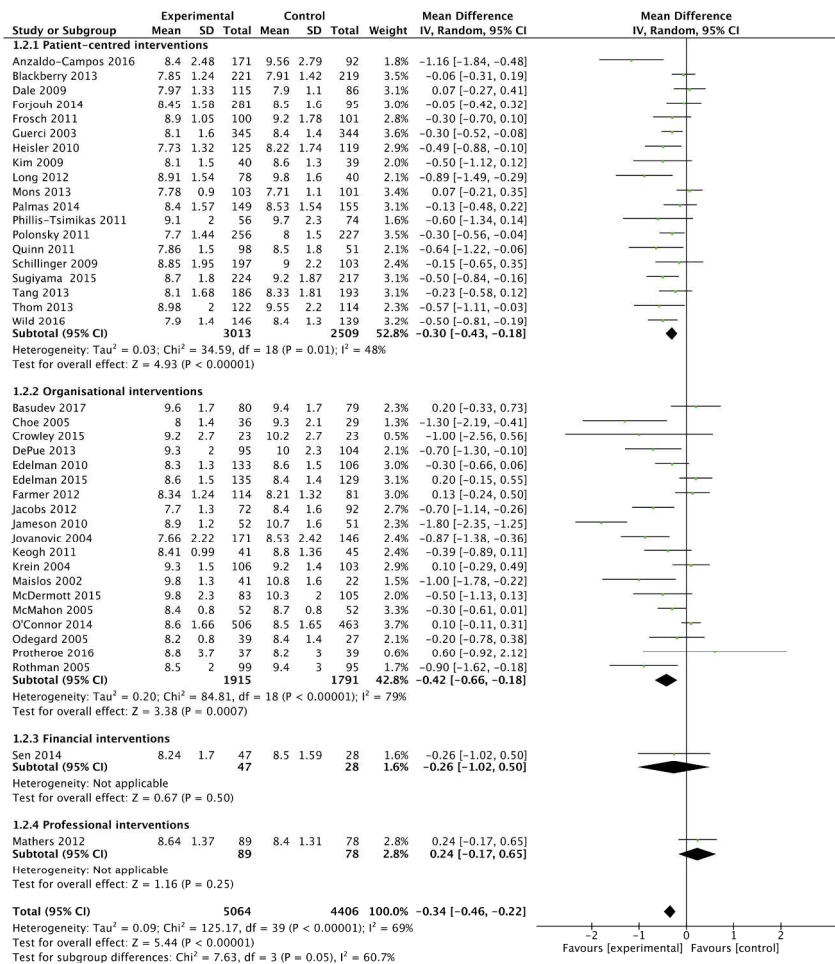

Figure 2a Effects of interventions on HbA1c, with intervention-type subgroups

209x278mm (300 x 300 DPI)

Figure 2b: Effects of interventions on HbA1c, with baseline-HbA1c subgroups

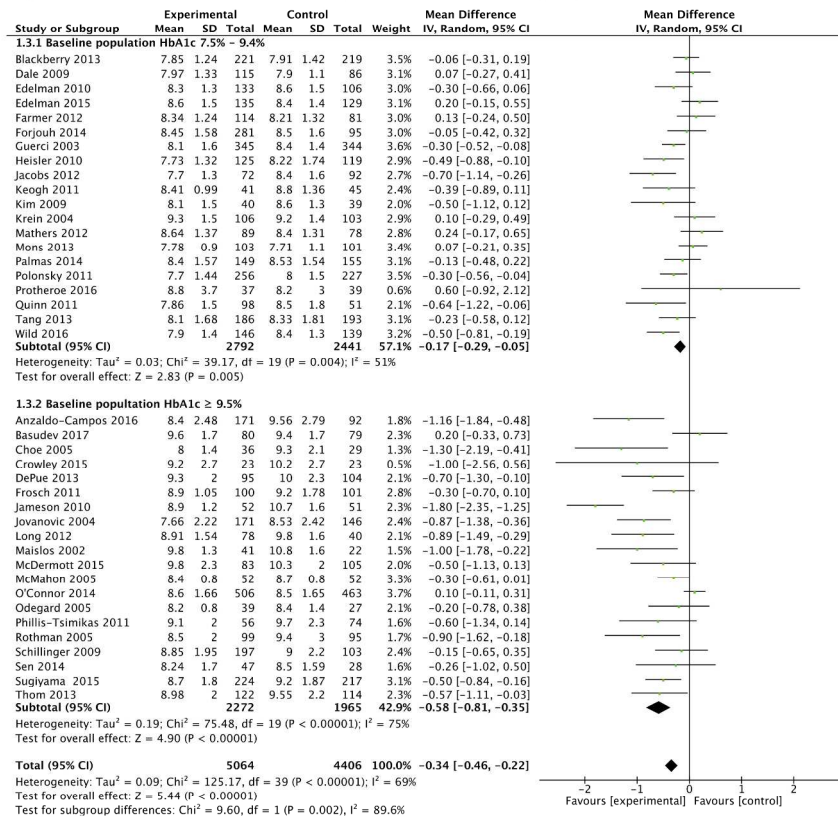

Figure 2b Effects of interventions on HbA1c, with baseline HbA1c subgroups

209x278mm (300 x 300 DPI)

1  
2  
3  
4  
5  
6  
7  
8  
9  
10  
11  
12  
13  
14  
15  
16  
17  
18  
19  
20  
21  
22  
23  
24  
25  
26  
27  
28  
29  
30  
31  
32  
33  
34  
35  
36  
37  
38  
39  
40  
41  
42  
43  
44  
45  
46  
47  
48  
49  
50  
51  
52  
53  
54  
55  
56  
57  
58  
59  
60

Figure 2c: Effects of interventions on HbA1c, with study-duration subgroups

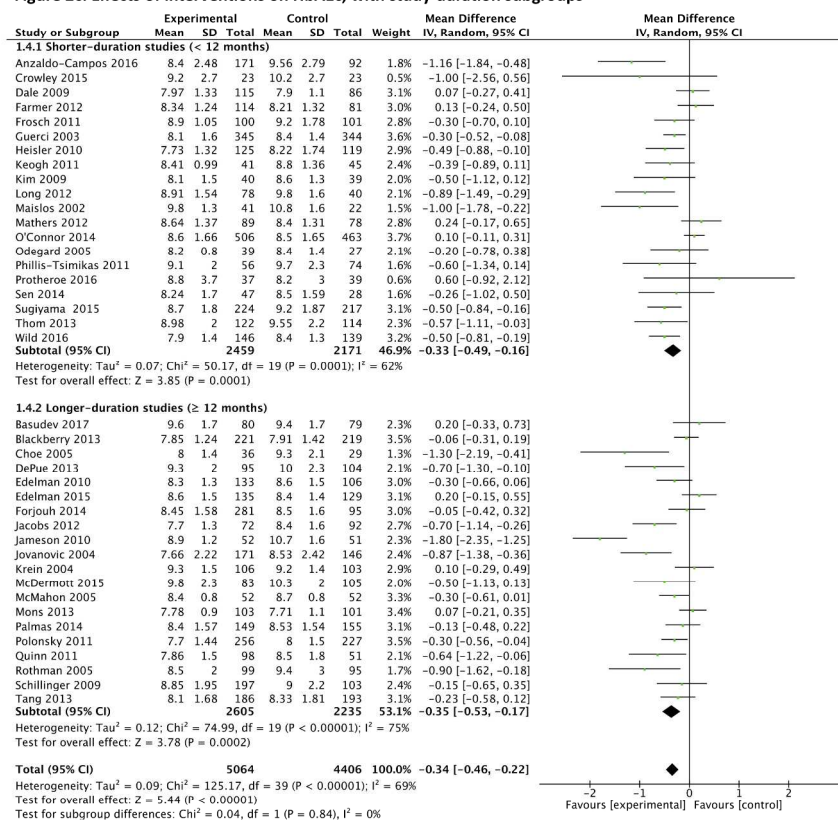

Figure 2c Effects of interventions on HbA1c, with with study quality subgroups

209x278mm (300 x 300 DPI)

Figure 2d: Effects of interventions on HbA1c, with study-quality subgroups

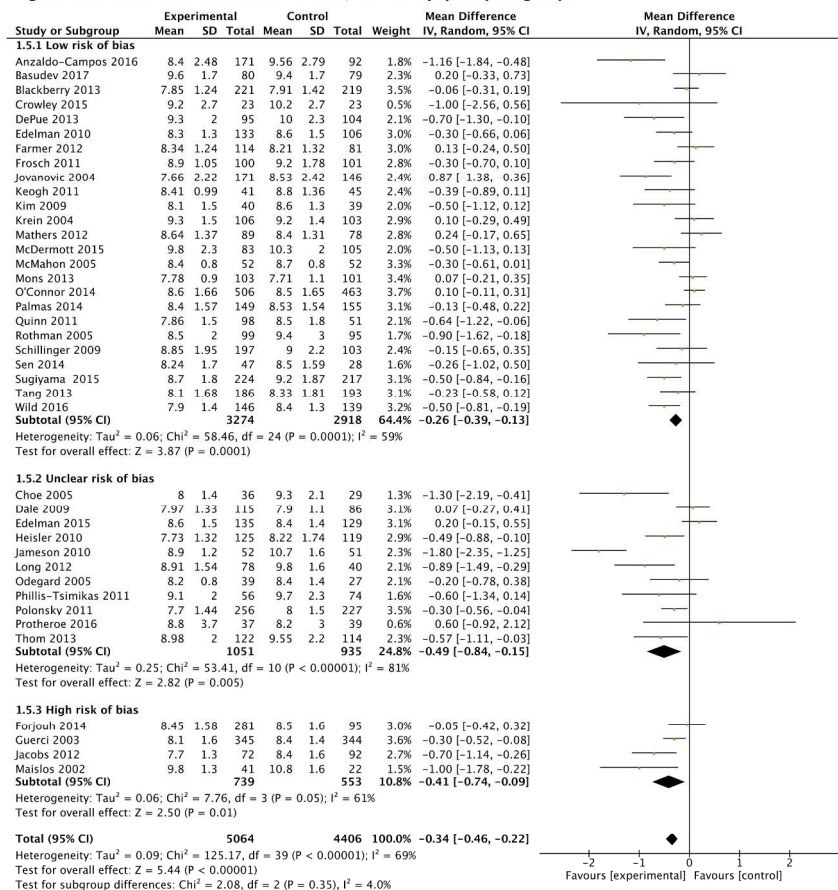

Figure 2d Effects of interventions on HbA1c, with study duration subgroups

209x278mm (300 x 300 DPI)

**Appendix 1: Search String****Pubmed/ Medline**

Diabetes OR T2D\$ OR NIDDM OR MODY OR Non-insulin dependent OR Insulin OR  
IDDM OR Poorly-controlled

AND

Lipid OR cholesterol OR blood pressure OR hypertension OR cardiovascular risk OR  
glycaemic OR glycemic OR HbA1c OR A1c OR (HbA AND (1c)) OR haemoglobin OR  
hemoglobin

AND

primary care or primary health or family physician\* or general practi\* or family  
practi\* or outpatient? or clinic? or ambulatory or health centre? or health centre? or  
office or veterans OR pharmacist OR nurse OR doctor OR psychologist OR OR health  
care provider OR case manager OR "case management" OR "care management"

((primary care[Title/Abstract] OR primary health[Title/Abstract] OR (family  
physician[Title/Abstract] OR family physicians[Title/Abstract]) OR (general  
practicability[Title/Abstract] OR general practice[Title/Abstract] OR general  
practice,[Title/Abstract] OR general practices[Title/Abstract] OR general  
practician[Title/Abstract] OR general practitioners[Title/Abstract] OR general  
practitioner[Title/Abstract] OR general practitioners[Title/Abstract] OR general  
practitioner[Title/Abstract] OR general practitioners[Title/Abstract] OR general  
practiioners[Title/Abstract] OR general practioner[Title/Abstract] OR general  
practioners[Title/Abstract] OR general practionner[Title/Abstract] OR general  
practionners[Title/Abstract] OR general practise[Title/Abstract] OR general  
practises[Title/Abstract] OR general practitioner[Title/Abstract] OR general

1  
2  
3 practitioner's[Title/Abstract] OR general practitioners[Title/Abstract] OR general  
4  
5 practitioner[Title/Abstract] OR general practitionners[Title/Abstract] OR general  
6  
7 practive[Title/Abstract]) OR (family practice[Title/Abstract] OR family  
8  
9 practices[Title/Abstract] OR family practioner[Title/Abstract] OR family  
10  
11 practise[Title/Abstract] OR family practitioner[Title/Abstract] OR family  
12  
13 practitioners[Title/Abstract]) OR outpatient?[Title/Abstract] OR  
14  
15 clinic?[Title/Abstract] OR ambulatory[Title/Abstract] OR health  
16  
17 centre?[Title/Abstract] OR health centre?[Title/Abstract] OR office[Title/Abstract]  
18  
19 OR veterans[Title/Abstract] OR pharmacist[Title/Abstract] OR nurse[Title/Abstract]  
20  
21 OR doctor[Title/Abstract] OR psychologist[Title/Abstract] OR health care  
22  
23 provider[Title/Abstract] OR case manager[Title/Abstract] OR "case  
24  
25 management"[Title/Abstract] OR "care management"[Title/Abstract]) AND  
26  
27 ("1990/01/01"[PDAT] : "2016/12/31"[PDAT])) AND ((Lipid[Title/Abstract] OR  
28  
29 cholesterol[Title/Abstract] OR blood pressure[Title/Abstract] OR  
30  
31 hypertension[Title/Abstract] OR cardiovascular risk[Title/Abstract] OR  
32  
33 glycaemic[Title/Abstract] OR glycemic[Title/Abstract] OR HbA1c[Title/Abstract] OR  
34  
35 A1c[Title/Abstract] OR (HbA[Title/Abstract] AND 1c[All Fields]) AND Title/Abstract[All  
36  
37 Fields] OR haemoglobin[Title/Abstract] OR hemoglobin[Title/Abstract]) AND  
38  
39 ("1990/01/01"[PDAT] : "2016/12/31"[PDAT])) AND ((Diabetes[Title/Abstract] OR  
40  
41 T2D\$[Title/Abstract] OR NIDDM[Title/Abstract] OR MODY[Title/Abstract] OR Non-  
42  
43 insulin dependent[Title/Abstract] OR Insulin[Title/Abstract] OR IDDM[Title/Abstract]  
44  
45 OR Poorly-controlled[Title/Abstract]) AND ("1990/01/01"[PDAT] :  
46  
47 "2016/12/31"[PDAT])) AND ("1990/01/01"[PDAT] : "2016/12/31"[PDAT])  
48  
49  
50  
51  
52  
53  
54  
55  
56  
57  
58  
59  
60



**WoS search**

TS = (Diabetes OR T2D\$ OR NIDDM OR MODY OR Non-insulin dependent OR Insulin OR IDDM OR Poorly-controlled )

AND

TS = (Lipid OR cholesterol OR blood pressure OR hypertension OR cardiovascular risk OR glycaemic OR glycemic OR HbA1c OR A1c OR (HbA AND (1c)) OR haemoglobin OR hemoglobin)

AND

TS = (primary care or primary health or family physician\* or general practi\* or family practi\* or outpatient? or clinic? or ambulatory or health centre? or health centre? or office)

TI = (Diabetes OR T2D\$ OR NIDDM OR MODY OR Non-insulin dependent OR Insulin OR IDDM OR Poorly-controlled ) AND TS = (Lipid OR cholesterol OR blood pressure OR hypertension OR cardiovascular risk OR glycaemic OR glycemic OR HbA1c OR A1c OR (HbA AND (1c)) OR haemoglobin OR hemoglobin) AND TS = (primary care or primary health or family physician\* or general practi\* or family practi\* or outpatient? or clinic? or ambulatory or health centre? or health centre? or office)

*Indexes=SCI-EXPANDED, SSCI, CPCI-S, CPCI-SSH Timespan=1990-2016*

**SCOPUS**

lipid OR cholesterol OR blood pressure OR hypertension OR cardiovascular risk

OR glycaemic OR glycemic OR hba1c OR a1c OR ( hba AND ( 1c ) ) OR haemogl  
obin OR hemoglobin AND diabetes OR t2d\$ OR niddm OR mody OR non-  
insulin dependent OR insulin OR iddm OR poorly-  
controlled AND primary care OR primary health OR family physician\* OR gener  
al practi\* OR family practi\* OR outpatient? OR clinic? OR ambulatory OR healt  
h centre? OR health centre? OR office AND ( EXCLUDE ( SUBJAREA , "DENT" ) O  
R EXCLUDE ( SUBJAREA , "ENVI" ) OR EXCLUDE ( SUBJAREA , "DENT" ) OR EXCLUD  
E ( SUBJAREA , "ENVI" ) OR EXCLUDE ( SUBJAREA , "ARTS" ) OR EXCLUDE ( SUBJAR  
EA , "CHEM" ) OR EXCLUDE ( SUBJAREA , "ENGI" ) OR EXCLUDE ( SUBJAREA , "BUS  
I" ) OR EXCLUDE ( SUBJAREA , "ECON" ) OR EXCLUDE ( SUBJAREA , "VETE" ) OR E  
XCLUDE ( SUBJAREA , "MATE" ) OR EXCLUDE ( SUBJAREA , "COMP" ) OR EXCLUDE  
( SUBJAREA , "MATH" ) OR EXCLUDE ( SUBJAREA , "EART" ) OR EXCLUDE ( SUBJAR  
EA , "PHYS" ) )

1990- 2016 Title abstract

**Embase**

(primary care OR primary health OR family physician\* OR general practi\* OR family  
practi\* OR outpatient? OR clinic? OR ambulatory OR health centre? OR health  
centre? OR office OR veterans OR pharmacist OR nurse OR doctor OR psychologist  
OR OR health care provider OR case manager OR case management OR care  
management):ab,ti

AND

(Lipid OR cholesterol OR blood pressure OR hypertension OR cardiovascular risk OR  
glycaemic OR glycemic OR HbA1c OR A1c OR (HbA AND (1c)) OR haemoglobin OR  
haemoglobin):ab,ti

AND

(Diabetes OR T2D\$ OR NIDDM OR MODY OR Non-insulin dependent OR Insulin OR  
IDDM OR Poorly-controlled):ab,ti

1  
2  
3 **Cochrane Library = 74**  
4  
5  
6  
7

8 (Diabetes OR T2D\$ OR NIDDM OR MODY OR Non-insulin dependent OR Insulin OR  
9 IDDM OR Poorly-controlled)  
10

11  
12  
13  
14 AND

15  
16  
17 (Lipid OR cholesterol OR blood pressure OR hypertension OR cardiovascular risk OR  
18 glycaemic OR glycemic OR HbA1c OR A1c OR (HbA AND (1c)) OR haemoglobin OR  
19 hemoglobin)  
20  
21

22  
23  
24  
25  
26 AND

27  
28  
29 (primary care or primary health or family physician\* or general practi\* or family  
30 practi\* or outpatient? or clinic? or ambulatory or health centre? or health centre? or  
31 office or veterans OR pharmacist OR nurse OR doctor OR psychologist OR health care  
32 provider OR case manager OR case management OR care management)  
33  
34  
35

36  
37  
38  
39  
40 (Diabetes OR T2D\$ OR NIDDM OR MODY OR Non-insulin dependent OR Insulin OR  
41 IDDM OR Poorly-controlled) AND ( Lipid OR cholesterol OR blood pressure OR  
42 hypertension OR cardiovascular risk OR glycaemic OR glycemic OR HbA1c OR A1c OR  
43 (HbA AND (1c)) OR haemoglobin) AND (primary care or primary health or family  
44 physician\* or general practi\* or family practi\* or outpatient? or clinic? or  
45 ambulatory or health centre? or health centre? or office or veterans OR pharmacist  
46 OR nurse OR doctor OR psychologist OR health care provider OR case manager OR  
47 case management OR care management) in Title, Abstract, Keywords in Cochrane  
48  
49  
50  
51  
52  
53  
54  
55  
56  
57  
58  
59  
60  
Reviews

1  
2  
3  
4  
5  
6  
7  
8  
9  
10  
11  
12  
13  
14  
15  
16  
17  
18  
19  
20  
21  
22  
23  
24  
25  
26  
27  
28  
29  
30  
31  
32  
33  
34  
35  
36  
37  
38  
39  
40  
41  
42  
43  
44  
45  
46  
47  
48  
49  
50  
51  
52  
53  
54  
55  
56  
57  
58  
59  
60

| <b>Appendix 2: Cochrane Effective Practice And Organisation of Care Review Group taxonomy of interventions:</b> |                                                                                                                                                                                                                                                                                       |
|-----------------------------------------------------------------------------------------------------------------|---------------------------------------------------------------------------------------------------------------------------------------------------------------------------------------------------------------------------------------------------------------------------------------|
| <b>Professional interventions</b>                                                                               | For example; distribution of educational materials to healthcare professional, or educational meetings, or audit and feedback.                                                                                                                                                        |
| <b>Organisational interventions</b>                                                                             | For example; Revision of professional role (e.g. community pharmacist providing case management for patient with diabetes) or skill mix changes (changes in numbers, types or qualifications of staff). Included telemedicine interventions with predominant organisational elements. |
| <b>Patient-orientated interventions</b>                                                                         | For example; patient education, peer support or support for self management. Including telephone and telemedicine interventions with predominant patients elements (with focus on self-management)                                                                                    |
| <b>Financial interventions</b>                                                                                  | For example; Fee-for-service for provider or a penalty for the patient.                                                                                                                                                                                                               |
| <b>Regulatory interventions</b>                                                                                 | For example; changes to local or national regulations designed to alter care delivery to improve outcomes.                                                                                                                                                                            |

## Appendix 3: Detailed description of study interventions

| N  | Study                                    | Brief intervention description                                                                                                                                                                                                                                                                                                            | Intervention description                                                                                                                                                                                                                                                                                                                                                                                                                                                                                                                                                                                                                                                                                                                                                                                                                                                                                                                                                                                                                                                                                                                                                                                                                                                                                                                                                                                                                                                                                                                                                                                                                                                                                                                                                 |
|----|------------------------------------------|-------------------------------------------------------------------------------------------------------------------------------------------------------------------------------------------------------------------------------------------------------------------------------------------------------------------------------------------|--------------------------------------------------------------------------------------------------------------------------------------------------------------------------------------------------------------------------------------------------------------------------------------------------------------------------------------------------------------------------------------------------------------------------------------------------------------------------------------------------------------------------------------------------------------------------------------------------------------------------------------------------------------------------------------------------------------------------------------------------------------------------------------------------------------------------------------------------------------------------------------------------------------------------------------------------------------------------------------------------------------------------------------------------------------------------------------------------------------------------------------------------------------------------------------------------------------------------------------------------------------------------------------------------------------------------------------------------------------------------------------------------------------------------------------------------------------------------------------------------------------------------------------------------------------------------------------------------------------------------------------------------------------------------------------------------------------------------------------------------------------------------|
| N. | Author<br>Year<br>Country                | Brief Intervention description                                                                                                                                                                                                                                                                                                            | Intervention description (detailed)<br><br>Length intervention<br><br>Predominant Intervention type<br><br>Comparison                                                                                                                                                                                                                                                                                                                                                                                                                                                                                                                                                                                                                                                                                                                                                                                                                                                                                                                                                                                                                                                                                                                                                                                                                                                                                                                                                                                                                                                                                                                                                                                                                                                    |
| 1  | Anzaldo-Campos<br><br>2016<br><br>Mexico | Two interventions:<br><br>Nurse care support and peer-led diabetes self-management education intervention (called Project Dulce).<br><br>Nurse care support and peer-led diabetes self-management education intervention. A technology-enhanced intervention, using cell phone uploads of glucose and BP levels and text message support. | Two interventions, called the Project Dulce Model:<br><br>1. Nurse care management through a combination of a multidisciplinary team of clinicians and nurse, as well as trained peer-led diabetes self-management education (this collectively is the called Project Dulce (PD) model. Clinicians underwent 16 hours of training and monthly ongoing education. The nurses , trained in diabetes care, provided personalized education to patients, in accordance with national guidelines. They also liaised with the peer educators, who either had diabetes themselves or lived or worked with people with diabetes. They underwent a training programme, modified for a Mexican population. Addressing fears pertaining to insulin use and addressing self-management was a focus of their educational sessions.<br><br>2. The PD intervention above, was combined with a technology-enhanced intervention, using cell phone uploads of glucose and BP levels and text message support (called the PD-TE intervention). Participants received free glucose monitors and training, they were asked to check their sugars twice a day for one month, then two days per week thereafter. The glucose data was uploaded to a central system and medical staff monitored these readings. Text messages, surveys, videos and brochures were also sent out to participants.<br><br>Length: The first intervention (PD) comprised eight weekly sessions with peer educators for two months, then monthly sessions thereafter up to 10 months in total. For the PD-TE group, text messages, surveys, videos and brochures were also sent throughout the 10 months.<br><br>Predominant EPOC intervention type: Patient-centred<br><br>Comparison: Usual general practice care |

|    |   |                     |                                                                                                                                                                                                                                                                                                                                                                                                                                                                                                                                                                                                                                                                     |
|----|---|---------------------|---------------------------------------------------------------------------------------------------------------------------------------------------------------------------------------------------------------------------------------------------------------------------------------------------------------------------------------------------------------------------------------------------------------------------------------------------------------------------------------------------------------------------------------------------------------------------------------------------------------------------------------------------------------------|
| 1  |   |                     |                                                                                                                                                                                                                                                                                                                                                                                                                                                                                                                                                                                                                                                                     |
| 2  |   |                     |                                                                                                                                                                                                                                                                                                                                                                                                                                                                                                                                                                                                                                                                     |
| 3  |   |                     |                                                                                                                                                                                                                                                                                                                                                                                                                                                                                                                                                                                                                                                                     |
| 4  |   |                     |                                                                                                                                                                                                                                                                                                                                                                                                                                                                                                                                                                                                                                                                     |
| 5  |   |                     |                                                                                                                                                                                                                                                                                                                                                                                                                                                                                                                                                                                                                                                                     |
| 6  |   |                     |                                                                                                                                                                                                                                                                                                                                                                                                                                                                                                                                                                                                                                                                     |
| 7  |   |                     |                                                                                                                                                                                                                                                                                                                                                                                                                                                                                                                                                                                                                                                                     |
| 8  | 2 | Basudev             | Virtual clinic integrating primary and specialist care                                                                                                                                                                                                                                                                                                                                                                                                                                                                                                                                                                                                              |
| 9  |   | 2016                |                                                                                                                                                                                                                                                                                                                                                                                                                                                                                                                                                                                                                                                                     |
| 10 |   | UK                  |                                                                                                                                                                                                                                                                                                                                                                                                                                                                                                                                                                                                                                                                     |
| 11 |   |                     | The intervention involved four steps. Initially it involved identification of the target patients (HbA1c > 8.5%). The second step involved a virtual clinic meeting (with around 20 cases), involving the community diabetes (specialist) team and practice team. The management plan for each patient was determined. The care was then allocated to primary, intermediate or secondary care. The third step involved the patient consultation, agreeing an individualised plan of management in collaboration with the patient, including therapy changes and addressing patient goals. The fourth step involved a 3-month review by the community diabetes team. |
| 12 |   |                     | Length: The intervention lasted 12 months with three-monthly reviews by the community diabetes team after the initial consultation.                                                                                                                                                                                                                                                                                                                                                                                                                                                                                                                                 |
| 13 |   |                     | Predominant EPOC intervention type: Organisational.                                                                                                                                                                                                                                                                                                                                                                                                                                                                                                                                                                                                                 |
| 14 |   |                     | Comparison: Usual general practice care.                                                                                                                                                                                                                                                                                                                                                                                                                                                                                                                                                                                                                            |
| 15 |   |                     |                                                                                                                                                                                                                                                                                                                                                                                                                                                                                                                                                                                                                                                                     |
| 16 |   |                     |                                                                                                                                                                                                                                                                                                                                                                                                                                                                                                                                                                                                                                                                     |
| 17 |   |                     |                                                                                                                                                                                                                                                                                                                                                                                                                                                                                                                                                                                                                                                                     |
| 18 | 3 | Blackberry          | Telephone coaching by nurses to support diabetes management and self monitoring                                                                                                                                                                                                                                                                                                                                                                                                                                                                                                                                                                                     |
| 19 |   | 2013                |                                                                                                                                                                                                                                                                                                                                                                                                                                                                                                                                                                                                                                                                     |
| 20 |   | Victoria, Australia |                                                                                                                                                                                                                                                                                                                                                                                                                                                                                                                                                                                                                                                                     |
| 21 |   |                     | The PEACH study:                                                                                                                                                                                                                                                                                                                                                                                                                                                                                                                                                                                                                                                    |
| 22 |   |                     | GP based nurse led telephone coaching; dealing with lifestyle issues, medication adherence and dosing, self monitoring of their disease, how to take greater initiative in the therapeutic alliance with their doctor, facilitating appropriate intensification of medications to achieve treatment goals. Nurses did not have prescribing rights.                                                                                                                                                                                                                                                                                                                  |
| 23 |   |                     | Length: In the first six months there were five telephone-coaching sessions at intervals of six weeks in the first six months, a coaching session at 8 and 10 months, a face-to-face coaching session at 12 months and a final coaching session at 15 months.                                                                                                                                                                                                                                                                                                                                                                                                       |
| 24 |   |                     | Predominant EPOC intervention type: Patient-centred                                                                                                                                                                                                                                                                                                                                                                                                                                                                                                                                                                                                                 |
| 25 |   |                     | Comparison: Usual general practice care                                                                                                                                                                                                                                                                                                                                                                                                                                                                                                                                                                                                                             |
| 26 |   |                     |                                                                                                                                                                                                                                                                                                                                                                                                                                                                                                                                                                                                                                                                     |
| 27 |   |                     |                                                                                                                                                                                                                                                                                                                                                                                                                                                                                                                                                                                                                                                                     |
| 28 | 4 | Capozza             | Text-message based behavioural intervention for T2DM                                                                                                                                                                                                                                                                                                                                                                                                                                                                                                                                                                                                                |
| 29 |   | 2015                |                                                                                                                                                                                                                                                                                                                                                                                                                                                                                                                                                                                                                                                                     |
| 30 |   | USA                 |                                                                                                                                                                                                                                                                                                                                                                                                                                                                                                                                                                                                                                                                     |
| 31 |   |                     | Receipt of 1-7 text diabetes-related messages per day, depending on the choices they made at enrolment. The content of the text messages were reviewed by certified diabetes educators and patients had control over the types and frequency of the messages. Users could turn off the program by texting the word 'stop'. The core messages related to diabetes education and health improvement (medication reminders, glucose testing reminders, BP measurement reminders and encouraging weight loss). Patients could reply to messages to get feedback.                                                                                                        |
| 32 |   |                     | Length: 6 months of text messages                                                                                                                                                                                                                                                                                                                                                                                                                                                                                                                                                                                                                                   |
| 33 |   |                     | Predominant EPOC intervention type: Patient                                                                                                                                                                                                                                                                                                                                                                                                                                                                                                                                                                                                                         |
| 34 |   |                     | Comparison: Usual care                                                                                                                                                                                                                                                                                                                                                                                                                                                                                                                                                                                                                                              |
| 35 |   |                     |                                                                                                                                                                                                                                                                                                                                                                                                                                                                                                                                                                                                                                                                     |
| 36 |   |                     |                                                                                                                                                                                                                                                                                                                                                                                                                                                                                                                                                                                                                                                                     |
| 37 |   |                     |                                                                                                                                                                                                                                                                                                                                                                                                                                                                                                                                                                                                                                                                     |
| 38 |   |                     |                                                                                                                                                                                                                                                                                                                                                                                                                                                                                                                                                                                                                                                                     |
| 39 | 5 | Choe                | Pharmacist case                                                                                                                                                                                                                                                                                                                                                                                                                                                                                                                                                                                                                                                     |
| 40 |   |                     | The case manager was a clinical pharmacist who was already established as a pharmacotherapy consultant at the clinic before the start of the intervention. The                                                                                                                                                                                                                                                                                                                                                                                                                                                                                                      |

|   |                                 |                                                                                                                                            |                                                                                                                                                                                                                                                                                                                                                                                                                                                                                                                                                                                                                                                                                                                                                                                                                                                                                                                                                                                                                                                                                                                                                                                                                                                                                                                                                                                                                                                                                                                                                                                                                                                                                              |
|---|---------------------------------|--------------------------------------------------------------------------------------------------------------------------------------------|----------------------------------------------------------------------------------------------------------------------------------------------------------------------------------------------------------------------------------------------------------------------------------------------------------------------------------------------------------------------------------------------------------------------------------------------------------------------------------------------------------------------------------------------------------------------------------------------------------------------------------------------------------------------------------------------------------------------------------------------------------------------------------------------------------------------------------------------------------------------------------------------------------------------------------------------------------------------------------------------------------------------------------------------------------------------------------------------------------------------------------------------------------------------------------------------------------------------------------------------------------------------------------------------------------------------------------------------------------------------------------------------------------------------------------------------------------------------------------------------------------------------------------------------------------------------------------------------------------------------------------------------------------------------------------------------|
|   | 2005<br><br>Michigan,<br>USA    | management                                                                                                                                 | <p>clinical pharmacist evaluated patient's therapeutic regimens based on efficacy, safety, adverse effects, drug interactions, drug costs and monitoring. All therapeutic recommendations were discussed with the primary care provider before significant therapy alterations. The pharmacist also followed up on these recommendations. Face to face consultations between pharmacist and physician were included.</p> <p>Length: Initial one-hour consultation with patient and monthly telephone contact thereafter and saw patients in conjunction with their routine primary care visits for one year.</p> <p>Predominant EPOC intervention type: Organisational.</p> <p>Comparison: Usual care.</p>                                                                                                                                                                                                                                                                                                                                                                                                                                                                                                                                                                                                                                                                                                                                                                                                                                                                                                                                                                                   |
| 6 | Crowley<br><br>2015<br><br>USA  | Intensive telemedicine intervention for veterans                                                                                           | <p>An advanced comprehensive diabetes care (ACDC) program, including telemonitoring, physician guided medication management, self-management behavioural support and physician guided depression management. It was delivered via a telephone using existing staff in the VA.</p> <p>VA home technology (HT) nurses delivered the intervention. Usual care involves HT nurses ringing patients, but they do not deliver a comprehensive diabetes management intervention like ACDC. In terms of telemonitoring, patients were asked and prompted to perform SMBG daily and to submit this on their HT-issued equipment. They were called by a HT nurse if they did not submit data for three days. In terms of self-management every two weeks a HT nurse rang the patient, delivering a diabetes self-management support module. This was a 30-minute telephone call every 2 weeks- reviewing blood glucose data, reconciling medications and reviewed adherence. For the physician medication management component, the HT nurse then contacted the study physician (an endocrinologist) and medication changes (such as insulin changes) were transmitted back to the HT nurse via an EHR- the nurse then relaying this on to the patients. In terms of depression, if the baseline or three-month PHQ9 was high, a psychiatrist of primary care physician input was made.</p> <p>Length: Daily telemonitoring, two weekly calls by a home technology nurse, input by endocrinology to nursing staff at two weekly intervals over six months.</p> <p>Predominant EPOC intervention type: Organisational</p> <p>Comparison: Usual care but received an educational packet in addition.</p> |
| 7 | Dale<br><br>2009<br><br>England | <p>Two intervention telecare groups:</p> <p>a) Peer-support telecare intervention</p> <p>b) Diabetic specialist nurse telecare support</p> | <p>Two intervention telecare (telephone) groups:</p> <p>a) Telephone peer-delivered intervention.</p> <p>b) Diabetic specialist nurse telecare support</p> <p>The telecare support was intended to supplement routine care by motivating adherence to the advice provided by the GP or practice nurse at the time of change (medication and/ or lifestyle) in diabetes care.</p> <p>Length of intervention: The first telecare call was made 3-5 days later and a standard package offered support 7-10, 14-18 28-35, 56-70, 56-120 days later.</p> <p>Training for the telecare support was with a two days training programme (motivational interviewing, active listening skills).</p> <p>Peer supporters recruited through a diabetes care user group. Otherwise they were trained as above. Two were excluded from the trial as they could not master the techniques.</p>                                                                                                                                                                                                                                                                                                                                                                                                                                                                                                                                                                                                                                                                                                                                                                                                               |



|    |                                                                                        |                                                                                                                                                 |                                                                                                                                                                                                                                                                                                                                                                                                                                                                                                                                                                                                                                                                                                                                                                                                                                                                                                                                                                                                                                                                                                                                                                                                                                                                                                                                                                                                                            |
|----|----------------------------------------------------------------------------------------|-------------------------------------------------------------------------------------------------------------------------------------------------|----------------------------------------------------------------------------------------------------------------------------------------------------------------------------------------------------------------------------------------------------------------------------------------------------------------------------------------------------------------------------------------------------------------------------------------------------------------------------------------------------------------------------------------------------------------------------------------------------------------------------------------------------------------------------------------------------------------------------------------------------------------------------------------------------------------------------------------------------------------------------------------------------------------------------------------------------------------------------------------------------------------------------------------------------------------------------------------------------------------------------------------------------------------------------------------------------------------------------------------------------------------------------------------------------------------------------------------------------------------------------------------------------------------------------|
|    |                                                                                        |                                                                                                                                                 | <p>The trained peer supporters had a median diabetes duration of 10 years and 6/9 had T2DM.</p> <p>They were paid a small fee and had access to an experienced DSN educationalist. They were invited to 6 monthly review meetings.</p> <p>Predominant EPOC intervention type: Patient-centred.</p> <p>Comparison: Usual care.</p>                                                                                                                                                                                                                                                                                                                                                                                                                                                                                                                                                                                                                                                                                                                                                                                                                                                                                                                                                                                                                                                                                          |
| 8* | <p>DePue</p> <p>2013</p> <p>U.S. Territory of America<br/>Somoa</p> <p>Cluster RCT</p> | <p>Nurse–Community Health Worker Team in American Somoa</p>                                                                                     | <p>Nurse–Community Health Worker Team: Nurse case manager (NCM) and four community health workers with a minimum of high school education- all staff underwent training. A field director supervised the research.</p> <p>Length: The NCM met with all patients at least once over 12 months, conducting group sessions with patients at high risk, providing feedback to physicians and oversight of CHW visits. The CHWs helped patients make and keep healthcare appointments, helped patients understand diabetes, reinforced adherence to medications and provided support. Patients at higher risk were seen weekly in a group meeting conducted by the NCM with CHW assistance or, if unable to attend the group meeting, they were seen individually by CHWs.</p> <p>Patients at moderate risk were seen monthly by CHWs and patients at lower risk were seen every 3 months. All individual visits occurred at the patient’s home, workplace, or at TC, per the patient’s choice. Family members were encouraged to attend these visits. BG and BP were monitored at each visit and urgent levels were referred immediately to the TC physician during clinic hours or to the hospital emergency department.</p> <p>Predominant EPOC intervention type: Organisational.</p> <p>Comparison: Usual care. Patients also received a self-care diabetes book and a risk profile was placed in their medical chart.</p> |
| 9  | <p>Edelman</p> <p>2010</p> <p>North Carolina and Virginia, USA.</p>                    | <p>Enrollment into a general medical clinic (GMC) with an internist, pharmacist and a nurse or educator that met seven times over 12 months</p> | <p>Patients in the intervention arm were assigned to a group medical clinic (GMC) that met on the patient’s preferred half-day. Each group had 7-8 patients and a care team (a primary care internist, a pharmacist, a nurse or certified diabetes educator).</p> <p>The groups met every 2 months (7 visits over 12 months).</p> <p>Patients were given \$10 for each GMC session they attended. The care team met the group at each visit and each group met the same care team at each visit. Each provider could be a member of more than one care team.</p> <p>Each GMC session lasted 90-120 minutes visit: BP and home glucose values were checked at each GMC session; education assessment was then delivered by nurse or educator- the patients chose certain topics so the education sessions were tailored to the member’s needs. The pharmacist and PCP reviewed the medical record, BP and glucose levels at each session and an individualized management plan directed at improving HbA1c and BP was formulated (medications and lifestyle based). The Primary Care Provider was then informed.</p> <p>Signed attendance contacts to boost attendance, telephone contact if needed to change management based upon lab results.</p> <p>All patients received usual primary care on top of this.</p>                                                                                                        |

|    |                        |                                                                    |                                                                                                                                                                                                                                                                                                                                                                                                                                                                                                                                                                                                                                                                                                                                                                                                                                                                                                                                                                                                                                                                                                                                                                                                                                                                                                                                                                                                                                                                                                                                                                                                                                                                                                                                                                                                                                                                         |
|----|------------------------|--------------------------------------------------------------------|-------------------------------------------------------------------------------------------------------------------------------------------------------------------------------------------------------------------------------------------------------------------------------------------------------------------------------------------------------------------------------------------------------------------------------------------------------------------------------------------------------------------------------------------------------------------------------------------------------------------------------------------------------------------------------------------------------------------------------------------------------------------------------------------------------------------------------------------------------------------------------------------------------------------------------------------------------------------------------------------------------------------------------------------------------------------------------------------------------------------------------------------------------------------------------------------------------------------------------------------------------------------------------------------------------------------------------------------------------------------------------------------------------------------------------------------------------------------------------------------------------------------------------------------------------------------------------------------------------------------------------------------------------------------------------------------------------------------------------------------------------------------------------------------------------------------------------------------------------------------------|
|    |                        |                                                                    | <p>Predominant EPOC intervention type: Organisational.</p> <p>Comparison: Usual care.</p>                                                                                                                                                                                                                                                                                                                                                                                                                                                                                                                                                                                                                                                                                                                                                                                                                                                                                                                                                                                                                                                                                                                                                                                                                                                                                                                                                                                                                                                                                                                                                                                                                                                                                                                                                                               |
| 10 | Edelman<br>2015<br>USA | Nurse case management                                              | <p>A single nurse with experience in case management delivered both the tailored behavioral intervention and the control.</p> <p>For the intervention arm, the content was tailored to each patient's individual barriers to controlling blood sugar or BP. This content was divided into a series of topical modules addressing one or more behaviors appropriate for improving control of BP or blood sugar, and included physical activity, weight reduction, low salt intake, smoking cessation, medication adherence, management of hypoglycemia, and blood glucose monitoring. The modules assessed barriers to specific behaviors, and the nurse then tried to engage the patient in problem-solving in order to determine actions for overcoming these barriers. In addition, barriers that might generalize to a number of problems—specifically, low levels of disease knowledge, poor memory, poor social support, and concern about the quality of physician-patient decision-making—were addressed on their own. Fidelity was assessed by two nurse-investigators (KP, BG), who listened to a sample of 5 % of total calls for delivery of intended content.</p> <p>Length: The nurse rang intervention and control patients 12 times in total over 24 months every 2 months.</p> <p>Predominant EPOC intervention type: Organisational</p> <p>Comparison: "Attention Control". The control patients received calls that were not tailored; these calls provided traditional didactic information on a range of topics that had no relationship to HTN, DM, or any of the behaviors we were trying to improve (e.g., flu shots, skin cancer prevention). Content was tightly scripted, designed to limit the potential for productive interaction between nurse and patient, and was informed by standard guidelines as stated on government websites.</p> |
| 11 | Farmer<br>2012<br>UK   | Nurse-led, multilevel intervention to support medication adherence | <p>Nurse-led, consultation-based intervention to support patients with adherence to taking glucose lowering medications.</p> <p>This was a multi-level intervention, targeting both health professional and patient behaviour. Initially there was training for the clinic nurses provided by a clinical psychologist and an intervention facilitator as the first part of the intervention. The aim was to strengthen patient motivation to take OGLM regularly and support medicine taking through action-plans.</p> <p>8 weeks after recruitment, patients were invited to the intervention visit to record and review their medication; and then randomised to either an intervention to support medication or adherence, or to standard care.</p> <p>There were 2 components in the intervention delivered to patients. (1) nurses elicited patient beliefs about intention to take their medications as prescribed. Positive beliefs were reinforced verbally and non-verbally, through provision of tailored information. Negative beliefs were addressed using problem solving and the nurse facilitated patients in action planning.</p> <p>The intervention consultation took 30 minutes, with 20 minutes for data collection, which both intervention and control patients received.</p> <p>Predominant EPOC intervention type: Organisational.</p>                                                                                                                                                                                                                                                                                                                                                                                                                                                                                                          |

1  
2  
3  
4  
5  
6  
7  
8  
9  
10  
11  
12  
13  
14  
15  
16  
17  
18  
19  
20  
21  
22  
23  
24  
25  
26  
27  
28  
29  
30  
31  
32  
33  
34  
35  
36  
37  
38  
39  
40  
41  
42  
43  
44  
45  
46  
47  
48  
49

|    |                         |                                                                                                                                                                                                                                                    |                                                                                                                                                                                                                                                                                                                                                                                                                                                                                                                                                                                                                                                                                                                                                                                                                                                                                                                                                                                                                                                                                                                                                                                                                                                                                                                                                                                                                                                                                                                                                                                                                                                                                                                                                                                                                                                                                                                                            |
|----|-------------------------|----------------------------------------------------------------------------------------------------------------------------------------------------------------------------------------------------------------------------------------------------|--------------------------------------------------------------------------------------------------------------------------------------------------------------------------------------------------------------------------------------------------------------------------------------------------------------------------------------------------------------------------------------------------------------------------------------------------------------------------------------------------------------------------------------------------------------------------------------------------------------------------------------------------------------------------------------------------------------------------------------------------------------------------------------------------------------------------------------------------------------------------------------------------------------------------------------------------------------------------------------------------------------------------------------------------------------------------------------------------------------------------------------------------------------------------------------------------------------------------------------------------------------------------------------------------------------------------------------------------------------------------------------------------------------------------------------------------------------------------------------------------------------------------------------------------------------------------------------------------------------------------------------------------------------------------------------------------------------------------------------------------------------------------------------------------------------------------------------------------------------------------------------------------------------------------------------------|
|    |                         |                                                                                                                                                                                                                                                    | Comparison: Usual care. The standard care visit lasted approximately 20 minutes, during which data were collected. Same nurses delivered this.                                                                                                                                                                                                                                                                                                                                                                                                                                                                                                                                                                                                                                                                                                                                                                                                                                                                                                                                                                                                                                                                                                                                                                                                                                                                                                                                                                                                                                                                                                                                                                                                                                                                                                                                                                                             |
| 12 | Forjough<br>2014<br>USA | Three intervention groups, reflecting the individual and combined effects of a behavioural and technology intervention; a chronic Disease Self-Management Program (CDSMP) and a diabetes self-care software on a personal digital assistant (PDA). | <p>Four arms in the trial:</p> <ul style="list-style-type: none"> <li>a) Chronic Disease Self Management Program (CDSMP)</li> <li>b) Personal digital assistant (PDA)</li> <li>c) Both CDSMP and PDA</li> <li>d) Usual care</li> </ul> <p>CDSMP: Involved a 6-week, classroom-based program for diabetes self-management. Based upon 1999 paper showing effectiveness of CDSMP. Its goal was to increase self-efficacy to decrease chronic disease related symptoms and avoidable healthcare utilization. It teaches participants techniques to facilitate enhanced decision making, action planning, and effective communication. CDSMP workshops hosted in clinical environments and community-based settings. Fidelity to classes not monitored. Master trainers/ lay leaders underwent 4 days of training- and the lay leaders used pre-scripted materials.</p> <p>PDA: This intervention arm were taught how to use a diabetes self-care software. It was loaded onto a handheld device and was called "Diabetes Pilot". The Diabetes Pilot allowed recording and some monitoring of blood glucose, BP, medication usage, physical activity and dietary intake on the PDA. One-to one instruction by a project coordinator covering key areas such as data entry, foot database utilization and reports was provided. Participants were instructed to input information daily. Training effectiveness was not assessed.</p> <p>CDSMP and PDA group received both.<br/>The CDSMP was a 6 week program, based in a classroom. Unclear how many workshops.<br/>The PDA arm: Uncertain, participants asked to use it daily and input information into it.<br/>Primary outcome 12 months, followed up to 24 months</p> <p>CDSMP: 6 weeks<br/>PDA: Uncertain, possibly 2 years</p> <p>Predominant EPOC intervention type: Patient-centred.</p> <p>Comparison: Usual care along with Texas Diabetes Council patient education materials.</p> |
| 13 | Frosch<br>2011          | A video behavioural support intervention by nurse educators with a workbook                                                                                                                                                                        | Intervention participants received a 24 minute long CDC program with an accompanying booklet called "Living with Diabetes: Making lifestyle changes to last a lifetime"- this was developed by the Foundation for Informed Decision Making. The participants were also entitled to have up to 5 sessions of telephone coaching with a bilingual nurse educator, trained in patient-centred approaches to diabetes management and motivational enhancement- with a goal to collaborate with participants in identifying behavioural goals and a behavioural plan.                                                                                                                                                                                                                                                                                                                                                                                                                                                                                                                                                                                                                                                                                                                                                                                                                                                                                                                                                                                                                                                                                                                                                                                                                                                                                                                                                                           |

1  
2  
3  
4  
5  
6  
7  
8  
9  
10  
11  
12  
13  
14  
15  
16  
17  
18  
19  
20  
21  
22  
23  
24  
25  
26  
27  
28  
29  
30  
31  
32  
33  
34  
35  
36  
37  
38  
39  
40  
41  
42  
43  
44  
45  
46  
47  
48  
49

|    |                          |                                                                                                                   |                                                                                                                                                                                                                                                                                                                                                                                                                                                                                                                                                                                                                                                                                                                                                                                                                                                                                                                                                                                                                                                                                                                                                                                    |
|----|--------------------------|-------------------------------------------------------------------------------------------------------------------|------------------------------------------------------------------------------------------------------------------------------------------------------------------------------------------------------------------------------------------------------------------------------------------------------------------------------------------------------------------------------------------------------------------------------------------------------------------------------------------------------------------------------------------------------------------------------------------------------------------------------------------------------------------------------------------------------------------------------------------------------------------------------------------------------------------------------------------------------------------------------------------------------------------------------------------------------------------------------------------------------------------------------------------------------------------------------------------------------------------------------------------------------------------------------------|
|    | USA                      | followed by 5 sessions of telephone coaching.                                                                     | <p>The first session was 60 minutes in length (2 weeks after enrollment), the second and third were 30 minutes, fourth and fifth were 15 minutes. Interval between telephone coaching was open to participants and nurse educators to negotiate. Both groups received a telephone call one week after enrollment to review intervention materials.</p> <p>Five coaching sessions (spread over a max duration of 2.5 hours) and a 24-minute DVD to watch, as well as a booklet on lifestyle changes in diabetes.</p> <p>Predominant EPOC intervention type: Patient-centred.</p> <p>Comparison: Usual care. Participants also received a 20-page brochure entitled "4 steps to control your diabetes for life" developed by the NIH.</p>                                                                                                                                                                                                                                                                                                                                                                                                                                            |
| 14 | Guerci<br>2003<br>France | <p>A self-monitoring of blood glucose intervention</p> <p>Auto-Surveillance Intervention Active (ASIA) study.</p> | <p>Self monitoring of blood glucose (SMBG):</p> <p>Patients received initial training by their GP at the initial inclusion visit. Patients were required to perform at least six capillary assays a week (3 different days, including the weekend).</p> <p>Standardised management including medications, blood glucose level, diet and physical exercise.</p> <p>Five visits were conducted during the intervention. At each visit, a clinical evaluation was performed. Laboratory values took place at 3 visits. At the third visit the GP could modify the treatments based upon the SBGM. At each consultation the patients were advised about management for T2DM.</p> <p>The intervention period was 24 weeks. Followed up every 6 weeks.</p> <p>Five visits were conducted during the intervention. At each visit, a clinical evaluation was performed (weight, SBP, DBP). Laboratory values took place at 3 visits.. At the third visit the GP could modify the treatments based upon the SBGM. . At each consultation the patients were advised about management of T2DM.</p> <p>Predominant EPOC intervention type: Patient-centred.</p> <p>Comparison: Usual care.</p> |
| 15 | Heisler<br>2010<br>USA   | Reciprocal peer support                                                                                           | <p>Initial face to face meeting in groups of 4-18 (in two age cohorts to aid cohesion and help patients get an age matched peer partner). Patients received \$20 for the initial and 6 monthly assessment.</p> <p>Reciprocal Peer support (RPS)</p> <p>3 hour group session facilitated by a care manager and research associate. Action planning on laboratory results. Training in peer communication, paired with an age-matched peer for peer support.</p> <p>Encouraged to call each other at least once per week.. Given a DVD on communication skill and a diabetes self management work book.</p> <p>Also offered three 1.5 hour group sessions at months 1,3 and 6- entirely patient-driven to discuss progress on action plans. Facilitation by a care manager or research associate.</p> <p>The care managers went through training- 4 hour course on motivational interviewing.</p>                                                                                                                                                                                                                                                                                    |

|    |                        |                                                       |                                                                                                                                                                                                                                                                                                                                                                                                                                                                                                                                                                                                                                                                                                                                                                                                                                                                                                                                                                                                                                                                                                                                                                                                                                                                                        |
|----|------------------------|-------------------------------------------------------|----------------------------------------------------------------------------------------------------------------------------------------------------------------------------------------------------------------------------------------------------------------------------------------------------------------------------------------------------------------------------------------------------------------------------------------------------------------------------------------------------------------------------------------------------------------------------------------------------------------------------------------------------------------------------------------------------------------------------------------------------------------------------------------------------------------------------------------------------------------------------------------------------------------------------------------------------------------------------------------------------------------------------------------------------------------------------------------------------------------------------------------------------------------------------------------------------------------------------------------------------------------------------------------|
|    |                        |                                                       | <p>Nurse care manager (NCM) was usual care: Attended a 1.5 hour session, led by the NCM, to discuss the results from the initial assessment, review results, ask questions and get information. Their care manager's phone number was given and follow up phone calls and face to face meetings were encouraged. Patients were provided with diabetes self management educational materials. In effect this is enhanced usual care- as many patients are not aware of and do not avail of this.</p> <p>Predominant EPOC intervention type: Patient-centred.</p> <p>Comparison: The comparator was enhanced usual care with nurse care management.</p>                                                                                                                                                                                                                                                                                                                                                                                                                                                                                                                                                                                                                                  |
| 16 | Jacobs<br>2012<br>USA  | A pharmacist assisted medication program intervention | <p>PAMPERED (pharmacist assisted medication program enhancing the regulation of diabetes) study:</p> <p>An initial pharmacist-patient clinic visit at baseline involved obtaining a comprehensive medication review; performing a targeted physical assessment including checking BMI, BP and a foot examination; education on diabetes; ordering laboratory values; reviewing, modifying and monitoring the patient's medication and providing detailed counselling on all therapies; facilitating self-monitoring of blood glucose; and providing reinforcement of dietary guidelines and exercise. These recommendations were based on most recent guidance. Approval by the patient's PCP was required before a treatment recommendation was made.</p> <p>Patients were required to attend a minimum of three visits with the pharmacist; at baseline, 6 months and 12 months for focused preventive and secondary diabetes management. Additional visits arranged as clinically appropriate. Laboratory outcomes checked at baseline, 6 and 12 months. On average 6.5 office visits with a pharmacist occurred over the 12 months.</p> <p>Predominant EPOC intervention type: Organisational.</p> <p>Comparison: Usual care.</p>                                                  |
| 17 | Jameson<br>2010<br>USA | A pharmacist collaborative management intervention    | <p>One pharmacist provided the intervention to the entire intervention group. This pharmacist was a board certified pharmacotherapy specialist, had an American Society of Health-System Pharmacists diabetes management traineeship, a postgraduate course in diabetes management from the American Diabetes Association and an educators training program.</p> <p>Patients met the pharmacist at the primary care site for an assessment of medication adherence, barriers to optimizing glucose control and a medication review. Individualized education was provided regarding self-management, lifestyle, medications and monitoring. Guidelines were followed. This included early switching to insulin after failure of 2 oral medications. The PCP approved any changes.</p> <p>After this visit, subsequent visits depended on control. Telephone calls also included.</p> <p>Initial visit. Telephone calls also included. Thereafter conducted as needed- as subsequent visits depended on control.</p> <p>Average 6 office visits and 3 telephone calls per patient over a one-year period. Office visits lasted between 30-60 minutes. Phone calls 10-20 minutes.</p> <p>Predominant EPOC intervention type: Organisational.</p> <p>Comparison: Probably usual care.</p> |

|    |                          |                                                                |                                                                                                                                                                                                                                                                                                                                                                                                                                                                                                                                                                                                                                                                                                                                                                                                                                                                                                                                                                                                                                                                                                                                                                                                                                                                     |
|----|--------------------------|----------------------------------------------------------------|---------------------------------------------------------------------------------------------------------------------------------------------------------------------------------------------------------------------------------------------------------------------------------------------------------------------------------------------------------------------------------------------------------------------------------------------------------------------------------------------------------------------------------------------------------------------------------------------------------------------------------------------------------------------------------------------------------------------------------------------------------------------------------------------------------------------------------------------------------------------------------------------------------------------------------------------------------------------------------------------------------------------------------------------------------------------------------------------------------------------------------------------------------------------------------------------------------------------------------------------------------------------|
| 18 | Jovanovic<br>2004<br>USA | Diabetes case management by a nurse or dietician               | <p>Case Management:</p> <p>Intensive diabetes case management was provided to the intervention group in addition to primary care.</p> <p>Study staff met with all patients at the beginning and end of the trial to assess overall health status and collect study outcomes. Quarterly assessments of outcomes were performed.</p> <p>The case manager was either a nurse or a dietician (working in close collaboration with an endocrinologist). Evidence based practice in terms of insulin initiation was agreed with collaboration with the PCP. Potential barriers to care were identified and educational strategies designed to address these barriers. American Diabetes Association goals for diabetes, BP and lipid treatment were used. Flexibility to allow individualized targets allowed. All patients educated about self-management and given a monitor. Diabetic educators assessed lifestyle behaviours and gave patients strategies to improve self-care. Transportation issues addressed to improve visit completion.</p> <p>Unclear how many meetings or interaction with a case manager occurred over the 36 months</p> <p>Predominant EPOC intervention type: Organisational.</p> <p>Comparison: Usual care from primary care provider.</p> |
| 19 | Keogh<br>2011<br>Ireland | Psychological family intervention                              | <p>Psychological family intervention for poorly controlled Type 2 diabetes.</p> <p>Three weekly sessions delivered by a health psychologist who had received 16 hours of training in motivational interviewing. The first two sessions lasted 45 minutes, taking place in the patient's home, with a family member. The third and final session was a 10-15 minute telephone call. Each session was tailored to the patient's needs involving a/ challenging negative perceptions of diabetes, 2/ examining how negative perceptions influenced self management and 3/ developing ways to improve self management and mobilise family support. Techniques such as exchange information, elicitation of change talk, reducing resistance, building self-efficacy, problem solving and goal setting were used.</p> <p>Predominant EPOC intervention type: Organisational.</p> <p>Comparison: Usual care.</p>                                                                                                                                                                                                                                                                                                                                                          |
| 20 | Kim<br>2009<br>USA       | A Community-based, culturally tailored behavioral intervention | <p>Culturally tailored comprehensive T2DM management intervention for Korean American immigrants.</p> <p>A community based self-help intervention program for type 2 diabetes mellitus (SHIP- DM) involving structured psycho-behavioural education, home glucose and BP telemonitoring and individualized telephone counselling from a bilingual nurse.</p> <p>It consisted of three concurrent programs.</p> <p>First, a 2 hourly weekly education session was delivered for 6 weeks. This was delivered at a community site by trained nurses and a nutritionist- to enhance knowledge and promote diabetes self-care behaviours for glucose control.</p>                                                                                                                                                                                                                                                                                                                                                                                                                                                                                                                                                                                                        |

1  
2  
3  
4  
5  
6  
7  
8  
9  
10  
11  
12  
13  
14  
15  
16  
17  
18  
19  
20  
21  
22  
23  
24  
25  
26  
27  
28  
29  
30  
31  
32  
33  
34  
35  
36  
37  
38  
39  
40  
41  
42  
43  
44  
45  
46  
47  
48  
49

|    |                      |                                                                                       |                                                                                                                                                                                                                                                                                                                                                                                                                                                                                                                                                                                                                                                                                                                                                                                                                                                                                                                                                                                                                                                                                                                                                                                                                                                                                                                                                                                         |
|----|----------------------|---------------------------------------------------------------------------------------|-----------------------------------------------------------------------------------------------------------------------------------------------------------------------------------------------------------------------------------------------------------------------------------------------------------------------------------------------------------------------------------------------------------------------------------------------------------------------------------------------------------------------------------------------------------------------------------------------------------------------------------------------------------------------------------------------------------------------------------------------------------------------------------------------------------------------------------------------------------------------------------------------------------------------------------------------------------------------------------------------------------------------------------------------------------------------------------------------------------------------------------------------------------------------------------------------------------------------------------------------------------------------------------------------------------------------------------------------------------------------------------------|
|    |                      |                                                                                       | <p>Secondly, there was home glucose monitoring and teletransmission- this lasted for 24 weeks after the educational program- each patient received monitors and a teletransmission system. Nurses could view this information.</p> <p>Thirdly, monthly telephone counselling by a bilingual nurse for 24 weeks was provided according to a standardized protocol- to reinforce new knowledge, to discuss problems, find solutions and provide emotional support. These lasted 10-25 minutes.</p> <p>At least 7 (one meeting and monthly telephone contact X 6 months)</p> <p>Predominant EPOC intervention type: Patient-centred.</p> <p>Comparison: Usual care with delayed intervention.</p>                                                                                                                                                                                                                                                                                                                                                                                                                                                                                                                                                                                                                                                                                          |
| 21 | Krein<br>2004<br>USA | Case management by nurse practitioners                                                | <p>Collaborative case management.</p> <p>All participants in trial given a blood pressure monitor, educational material and a periodical newsletter</p> <p>Two nurse practitioner care managers worked with patients and their primary care providers, monitoring and coordinating care for the intervention group for 18 months, through telephone calls, collaborative goal setting and treatment algorithms.</p> <p>There were two nurse case managers. One nurse was present at each site, providing 20 hours of care per week, to approximately 60 patients each. They had a 2 days training program on collaborative goal setting- and training updates at 6-month intervals.</p> <p>Patient contact was predominantly by telephone, though face-to-face contact could happen. Case managers encouraged self-management, diet exercise, provided reminders of screenings and tests, monitored home glucose and BP measures and identified medication changes as needed. Medications treatment algorithms were given to the case managers. Every change was approved by the PCP- being notified of changes by email.</p> <p>Predominant EPOC intervention type: Organisational.</p> <p>Comparison: Usual care. Patients also received educational materials. All participants in trial were given a blood pressure monitor, educational materials and a periodical newsletter.</p> |
| 22 | Long<br>2012<br>USA  | Two interventions:<br><br>Peer mentoring<br><br>Financial incentivisation of patients | <p>Two intervention groups, one control. Received €25 for filling out a survey at Month 0 and Month 6. Also were notified of their starting HbA1c level and of the ADA and VA recommendations.</p> <p>1/ Peer mentoring:<br/>Patients in this group matched to a peer supporter within 1-3 weeks. Peer reviewers were all African American patients with prior poor T2Dm control in the past but well controlled recently. They were matched by sex and age (+/- 10 years).</p> <p>Training: They received a 1-hour long 1:1 training session informed by motivational interviewing techniques. Uncertain who trained the peer mentors.</p> <p>No monitoring of the calls. The mentor-mentee contacts were all telephone calls. Mentors were incentivized with \$20 per month if they talked at least once per</p>                                                                                                                                                                                                                                                                                                                                                                                                                                                                                                                                                                      |

|    |                                                         |                                                                               |                                                                                                                                                                                                                                                                                                                                                                                                                                                                                                                                                                                                                                                                                                                                                                                                                                                                                                                                                                                          |
|----|---------------------------------------------------------|-------------------------------------------------------------------------------|------------------------------------------------------------------------------------------------------------------------------------------------------------------------------------------------------------------------------------------------------------------------------------------------------------------------------------------------------------------------------------------------------------------------------------------------------------------------------------------------------------------------------------------------------------------------------------------------------------------------------------------------------------------------------------------------------------------------------------------------------------------------------------------------------------------------------------------------------------------------------------------------------------------------------------------------------------------------------------------|
|    |                                                         |                                                                               | <p>week with their mentee. Mentors were also given \$25 after the training session and after an exit interview.</p> <p>Peer mentoring: Aiming to have 4 calls per month for 6 months. The Results showed 38% mentors talked 4 times per month during the first month and by Month 6, that reduced to 16%</p> <p>2/ Financial incentives<br/>In the financial incentive arm, participants were told that they would receive \$100 at 6 months if their HbA1c level decreased by 1%, and \$200 if it reduced by 2% or to 6.5%.</p> <p>Predominant EPOC intervention type: Patient-centred.</p> <p>Comparison: Usual care.</p>                                                                                                                                                                                                                                                                                                                                                              |
| 23 | <p>Maislos</p> <p>2002</p> <p>Israel</p>                | <p>A mobile clinic providing interdisciplinary care</p>                       | <p>Interdisciplinary care via a mobile clinic offered by the Western Negev Mobile Clinic Diabetes Program (WNMCDP).</p> <p>WNMCDP is a weekly mobile diabetes clinic aimed to provide interdisciplinary care for patients, in primary care facilities. An initial visit involved a meeting with a diabetologist, the dietician and a nurse educator. After this regular follow visits were scheduled. The team held a weekly evening meeting at the clinic and the nurse and dietician have an additional weekly meeting at the primary care site. At the meeting, all patients received dietary counselling and have a session with the nurse educator. Continuation of treatment and follow up visits are scheduled according to the patient's condition. Special emphasis was placed on education, to improve compliance and lifestyle behaviours.</p> <p>Mobile clinic visited weekly.</p> <p>Predominant EPOC intervention type: Organisational.</p> <p>Comparison: Usual care.</p> |
| 24 | <p>Mathers</p> <p>2012</p> <p>UK</p> <p>Cluster RCT</p> | <p>Patient decision aid to improve decision quality and glycaemic control</p> | <p>PANDAs study: using patient decision aid (PDA):</p> <p>A complex intervention with three components; PDA, healthcare professional training workshop and use of PDA in a consultation.</p> <p>Development of PDA done with MRC framework- to facilitate decision making between clinicians and patients</p> <p>Doctors and nurses involved with diabetes care in the practice attended a 2-hour training session on how to use the PANDAs decision aid (shared decision making, communication skills, the evidence of different treatment options).</p> <p>The PANDAs decision aid was given to the patient prior to the consultation with the nurse or GP- it included information about insulin or other treatments, presented probabilities of outcomes, it clarified patient values and gave structured guidance. The patient then saw the GP and nurse, facilitated with the use of the PANDAs aid.</p> <p>This was a one off intervention given on 1 day</p>                     |



|    |                                                         |                                                                                                                                                                                                 |                                                                                                                                                                                                                                                                                                                                                                                                                                                                                                                                                                                                                                                                                                                                                                                                                                                                                                                                                                                                                                                                                                                                                                                             |
|----|---------------------------------------------------------|-------------------------------------------------------------------------------------------------------------------------------------------------------------------------------------------------|---------------------------------------------------------------------------------------------------------------------------------------------------------------------------------------------------------------------------------------------------------------------------------------------------------------------------------------------------------------------------------------------------------------------------------------------------------------------------------------------------------------------------------------------------------------------------------------------------------------------------------------------------------------------------------------------------------------------------------------------------------------------------------------------------------------------------------------------------------------------------------------------------------------------------------------------------------------------------------------------------------------------------------------------------------------------------------------------------------------------------------------------------------------------------------------------|
|    |                                                         |                                                                                                                                                                                                 | <p>Predominant EPOC intervention type: Professional.</p> <p>Comparison: Usual care.</p>                                                                                                                                                                                                                                                                                                                                                                                                                                                                                                                                                                                                                                                                                                                                                                                                                                                                                                                                                                                                                                                                                                     |
| 25 | <p>McDermott<br/>2015<br/>Australia<br/>Cluster RCT</p> | <p>Community-based health-worker led case management approach to the care of Indigenous adults with poorly controlled type 2 diabetes in primary care services in remote northern Australia</p> | <p>Each site allocated to the intervention arm recruited an Indigenous health worker resident in the community (selected by the health service) to work as part of the primary care team, and allocated a caseload of between 9 and 26 clients. The health workers with low caseloads worked part-time. All health workers at the commencement of the study received an intensive 3-week training in clinical aspects of diabetes and other chronic condition care, including how to support patients in self-management skills, advice on medications, routine foot care, nutrition, smoking cessation, follow up referrals to other providers, and scheduled tests.</p> <p>Length: During the 18 month intervention period, the health workers attended two workshops where they underwent refresher training, including in Good Clinical Practice and reflective practice. During these sessions, they reported on their patients' progress and shared approaches to problem solving with the clinical support team and peers.</p> <p>Predominant EPOC intervention type: Organisational</p> <p>Comparison: Usual care.</p>                                                              |
| 26 | <p>McMahon<br/>2005<br/>USA</p>                         | <p>Web-based care management</p>                                                                                                                                                                | <p>Web based care management involving training and giving a notebook computer, glucose and blood pressure monitoring devices and access to a care management website. The website provided educational modules, accepted uploads from monitoring devices and had an internal messaging system for patients to communicate with the care manager. Given free internet.</p> <p>Training to each participant for mean of 2.3 hours. Home BP monitoring encouraged three times weekly. Glucose monitoring frequency was individualized. Participants could communicate with a care manager through the website. If they did not use the website for two weeks, they were contacted by phone.</p> <p>An advanced practice nurse reviewed patient information and provided recommendation to the PCP about treatment changes, based upon guidelines.</p> <p>Episodes: Unclear, one training session and then self-usage of web management (patients contacted if they didn't use after 2 weeks). 1 year.</p> <p>Predominant EPOC intervention type: Organisational.</p> <p>Comparison: Usual care. All participants attended a self-management educational session (prior to randomization).</p> |
| 27 | <p>Mons<br/>2013<br/>Germany</p>                        | <p>Supportive telephone counseling</p>                                                                                                                                                          | <p>Supportive telephone counseling intervention led by practice nurses of the participating GP practices- monthly over 12 months. Each nurse was trained before hand. Each call lasted 10 minutes, was structured and included questions on patients' physical and mental condition, medication adherence, symptoms, and lifestyle advice. The items were designed to motivate the patients, identify barriers and help self-management.</p> <p>Monthly over 12 months. Over 90% had 10-12 sessions.</p> <p>Predominant EPOC intervention type: Patient-centred.</p> <p>Comparison: Usual care.</p>                                                                                                                                                                                                                                                                                                                                                                                                                                                                                                                                                                                         |

|    |                                        |                                                                                                  |                                                                                                                                                                                                                                                                                                                                                                                                                                                                                                                                                                                                                                                                                                                                                                                                                             |
|----|----------------------------------------|--------------------------------------------------------------------------------------------------|-----------------------------------------------------------------------------------------------------------------------------------------------------------------------------------------------------------------------------------------------------------------------------------------------------------------------------------------------------------------------------------------------------------------------------------------------------------------------------------------------------------------------------------------------------------------------------------------------------------------------------------------------------------------------------------------------------------------------------------------------------------------------------------------------------------------------------|
| 28 | O'Connor<br>2014<br>USA<br>Cluster RCT | Telephone Outreach to Improve Medication Adherence and Metabolic Control in Adults With Diabetes | <p>The telephone intervention was delivered by interventionists who were pharmacists, diabetes educators, or nurse health managers trained in the use of the study protocol and intervention. Those randomized to the intervention, who had recently been prescribed a new medication for poorly controlled T2DM, received a single structured telephone call to ascertain if the patient had started the medication. Positive reinforcement was made to those who had started. For those who had not started, the interventionist probed for reasons of non-adherence and resolved to solve any barriers.</p> <p>Length: One phone-call lasting &lt; 5 minutes. Most calls occurred within 2-6 weeks after prescription date.</p> <p>Predominant EPOC intervention type: Organisational</p> <p>Comparison: Usual care.</p> |
| 29 | Odegard<br>2005<br>USA                 | A pharmacist intervention care management intervention                                           | <p>Pharmacist intervention was composed of a diabetes care plan (DCP), a regular pharmacist-patient communication on diabetes care progress and pharmacist-provider communication on the subject's diabetes care progress. Medication related problems were identified. The intervention commenced one week after baseline data interview. A face-to-face appointment created this DCP which was communicated to the PCP.</p> <p>Weekly face-to-face or telephone communication was kept with the patient and the pharmacist- then reduced to monthly when deemed necessary over a 6-month period.</p> <p>On average there were 4.5 telephone contacts and 2.1 in person visits.</p> <p>Predominant EPOC intervention type: Organisational.</p> <p>Comparison: Usual care.</p>                                              |
| 30 | Palmas<br>2014<br>USA                  | Community health worker (CHW) intervention in an Hispanic population                             | <p>12-month CHW intervention or enhanced usual care</p> <p>Two full time CHWs delivered a multicomponent intervention that included one-to-one visits, group visits and telephone follow up. They used the Small Steps, Big Rewards framework. Goal setting and discussing barriers were features of the visits. A needs assessment was performed throughout the year.</p> <p>Episodes of care:<br/>Aimed for 4 1:1 visits, 10 groups sessions and 20 follow up phone calls over the year per subject.</p> <p>Predominant EPOC intervention type: Patient-centred.</p> <p>Comparison: 'Enhanced usual care'. Spanish-language educational material posted every three months, preceded by phone calls, to ensure participants received the brochures.</p>                                                                   |
| 31 | Phillis-Tsimikas                       | Peer-led diabetes education programs in high-risk Mexican                                        | <p>Assessments at month 0, 4 (post intervention) and 10- intervention participants were given a glucometer and a small gift card. The Project Dulce (intervention) group received eight weekly 2 hour diabetes self management classes for two months; and then monthly support groups, each 2 hours in length, led by a trained peer educator. Before the intervention those individuals, living in this community, with diabetes, that had traits of being a good leader were identified</p>                                                                                                                                                                                                                                                                                                                              |

|    |                                        |                                                                                                                 |                                                                                                                                                                                                                                                                                                                                                                                                                                                                                                                                                                                                                                                                                                                                                                                                                                                                                                                                                                                                                                                                                                                                                                                                                                                                                                                                                                                                                                                                                                                                                                                                                                                                                                                                                                         |
|----|----------------------------------------|-----------------------------------------------------------------------------------------------------------------|-------------------------------------------------------------------------------------------------------------------------------------------------------------------------------------------------------------------------------------------------------------------------------------------------------------------------------------------------------------------------------------------------------------------------------------------------------------------------------------------------------------------------------------------------------------------------------------------------------------------------------------------------------------------------------------------------------------------------------------------------------------------------------------------------------------------------------------------------------------------------------------------------------------------------------------------------------------------------------------------------------------------------------------------------------------------------------------------------------------------------------------------------------------------------------------------------------------------------------------------------------------------------------------------------------------------------------------------------------------------------------------------------------------------------------------------------------------------------------------------------------------------------------------------------------------------------------------------------------------------------------------------------------------------------------------------------------------------------------------------------------------------------|
|    | 2011<br>USA                            | Americans                                                                                                       | <p>and trained over a 3 month period. Peer educators spent 40 hours learning the curriculum, behavior modification techniques etc. Then they co-taught a session with a trainer, before being supervised giving a session before doing it alone. The curriculum covered many aspect of diabetes management. If patients were noticed not be meeting targets for diabetes care, the peer educator would direct them to the PCP- they would not make any medication related changes themselves.</p> <p>Episodes of care: Unclear how many, but envisaged as 8 weekly classes for two months, then monthly for the next three months.</p> <p>Predominant EPOC intervention type: Patient-centred.</p> <p>Comparison: Usual care.</p>                                                                                                                                                                                                                                                                                                                                                                                                                                                                                                                                                                                                                                                                                                                                                                                                                                                                                                                                                                                                                                       |
| 32 | Polonsky<br>2011<br>USA<br>Cluster RCT | Self blood glucose monitoring                                                                                   | <p>STeP (Structured Testing Programme) is a 12-month Cluster RCT assessing efficacy of structured self-monitoring of blood glucose (SMBG) in T2DM patients (none on insulin).</p> <p>Both physicians and patients participated in a collaborative programme to gather, interpret and act upon the structured SMBG data, at 3 monthly intervals, to make treatment modifications.</p> <p>The study's duration was 12 months with patient visits occurring at initial screening and baseline followed by visits at months 1, 3, 6, 9, and 12.</p> <p>At all subsequent visits (months 1, 3, 6, 9, and 12), ACG and STG clinic staff collected laboratory samples, recorded changes in medications, and performed brief physical examinations. Point-of-care A1C equipment (A1CNow+ test kit; Bayer Healthcare, Tarrytown, NY) was provided to all practices for clinical use only to assure that differential availability of the equipment did not affect outcomes. Patients in both groups brought their meters to each subsequent visit for electronic data uploading; physicians and clinic staff were blinded to these data and all other study-collected measures. Patients also reported all changes made to their diabetes regimen since their last visit. All patients completed the STeP questionnaire and a post-visit questionnaire to record physician discussion of SMBG results and recommendations for pharmacologic and lifestyle changes that occurred during the visit.</p> <p>Predominant EPOC intervention type: Patient-centred.</p> <p>Comparison: 'Enhanced usual care': quarterly diabetes focused physician visits, free blood glucose meters and strips and they were evaluated at months 1, 3, 6, 9 and 12 (like the intervention group).</p> |
| 33 | Protheroe<br>2016<br>UK                | Lay Health Trainer (LHT) interviews with patients, creating a self-management plan, with supportive phone calls | <p>A structured interview with a Lay Health Trainer (LHT) and development of an individualised patient self-management plan and follow up thereafter with phone calls. The LHTs were trained on diabetes care and lifestyle advice, but they did not provide medical or nursing advice. They provided information to participants regarding advantages and disadvantages of behaviour change.</p> <p>Length: The intervention lasted 6 months. An initial structured interview was followed by up to three two-monthly support phone calls from the LHT for a maximum of 6 months.</p> <p>Predominant EPOC intervention type: Organisational</p>                                                                                                                                                                                                                                                                                                                                                                                                                                                                                                                                                                                                                                                                                                                                                                                                                                                                                                                                                                                                                                                                                                                        |

|    |                                     |                                                                                   |                                                                                                                                                                                                                                                                                                                                                                                                                                                                                                                                                                                                                                                                                                                                                                                                                                                                                                                                                                                                                                                                                                                                                                                                                                                           |
|----|-------------------------------------|-----------------------------------------------------------------------------------|-----------------------------------------------------------------------------------------------------------------------------------------------------------------------------------------------------------------------------------------------------------------------------------------------------------------------------------------------------------------------------------------------------------------------------------------------------------------------------------------------------------------------------------------------------------------------------------------------------------------------------------------------------------------------------------------------------------------------------------------------------------------------------------------------------------------------------------------------------------------------------------------------------------------------------------------------------------------------------------------------------------------------------------------------------------------------------------------------------------------------------------------------------------------------------------------------------------------------------------------------------------|
|    |                                     |                                                                                   | Comparison: Usual general practice care                                                                                                                                                                                                                                                                                                                                                                                                                                                                                                                                                                                                                                                                                                                                                                                                                                                                                                                                                                                                                                                                                                                                                                                                                   |
| 34 | Quinn<br>2011<br>USA<br>Cluster RCT | Mobile phone-based treatment/ behavioural coaching intervention                   | <p>Mobile phone-based treatment/ behavioural coaching intervention</p> <p>26 primary care practices, randomly assigned to one of four groups:</p> <p>1/ Coach-only (CO) group- included a mobile diabetes management software application and a web portal. The mobile software allowed patients to enter diabetes self-care data (glucose, diet, medications) on a mobile phone and receive automated, real-time educational, behavioural and motivational messaging specific to the entered data.</p> <p>2/ Coach PCP portal (CPP)- The patient web portal augmented the mobile software and had a secure messaging centre with additional information.</p> <p>3/ Coach PCP portal with decision support (CPDS): This group had providers with access to analysed patient data that could make decisions linked to standards of care.</p> <p>All patients received a glucometer and mobile phone with 1 year unlimited free data and service plan. Diabetes educators intermittently reviewed the patient data. Patients could communicate by phone or electronically to educators. Patients also received an electronic action plan every 2.5 months.</p> <p>Predominant EPOC intervention type: Patient-centred.</p> <p>Comparison: Usual care.</p>   |
| 35 | Rothman<br>2005<br>USA              | A primary care-based disease management program delivered by trained pharmacists. | <p>Pharmacist intervention: Three pharmacists (trained in the outpatient department) delivered the intervention within the general medicine practice - two of them were diabetic educators. The intervention included intensive educational sessions, evidence-based algorithms, proactive management of clinical parameters and treatment recommendations that were shared with the PCP.</p> <p>A diabetes care coordinator was also part of the intervention and this person addressed health behaviour and education- this coordinator rang patients regularly.</p> <p>Pharmacists rang the patient or met them every 2-4 weeks, or more frequently if needed. Unclear if there was a face to face meeting (probably was in the General Medicine Practice. A coordinator also rang patients from time to time.</p> <p>A median of 45 contacts or care-related activities between pharmacists and patients were recorded; about 38 minutes each month.</p> <p>Predominant EPOC intervention type: Organisational.</p> <p>Comparison: Usual care after a 1-hour management session that was conducted by a clinical pharmacist practitioner from the disease management team, including education and treatment recommendations approved by the PCP.</p> |
| 36 | Schillinger                         | Two interventions:                                                                | Two interventions in the Improving Diabetes Efforts Across Language and Literacy (IDEALL) Project:                                                                                                                                                                                                                                                                                                                                                                                                                                                                                                                                                                                                                                                                                                                                                                                                                                                                                                                                                                                                                                                                                                                                                        |

1  
2  
3  
4  
5  
6  
7  
8  
9  
10  
11  
12  
13  
14  
15  
16  
17  
18  
19  
20  
21  
22  
23  
24  
25  
26  
27  
28  
29  
30  
31  
32  
33  
34  
35  
36  
37  
38  
39  
40  
41  
42  
43  
44  
45  
46  
47  
48  
49

|           |                                       |                                                                                                                              |                                                                                                                                                                                                                                                                                                                                                                                                                                                                                                                                                                                                                                                                                                                                                                                                                                                                                                                                                                                                                                                                                                                                                                                                                                                                                                                                                                                       |
|-----------|---------------------------------------|------------------------------------------------------------------------------------------------------------------------------|---------------------------------------------------------------------------------------------------------------------------------------------------------------------------------------------------------------------------------------------------------------------------------------------------------------------------------------------------------------------------------------------------------------------------------------------------------------------------------------------------------------------------------------------------------------------------------------------------------------------------------------------------------------------------------------------------------------------------------------------------------------------------------------------------------------------------------------------------------------------------------------------------------------------------------------------------------------------------------------------------------------------------------------------------------------------------------------------------------------------------------------------------------------------------------------------------------------------------------------------------------------------------------------------------------------------------------------------------------------------------------------|
|           | <p>2009<br/><br/>USA</p>              | <p>Self-Management Support via 1/ Automated telephone self-management support (ATSM) and 2/ Group medical visits (GMVs).</p> | <p>Two self management support (SMS) systems, conducted in a safety net health system were tested against a control; a) Automated telephone self management support (ATSM) and b) Group medical visits (GMVs).</p> <p>ATSM and GVCs attempt to activate patients, routed in efficacy theory.</p> <p>ATSM:<br/>ATSM patients received automated (pre-recorded) telephone calls over 39 weeks (9 months). Patient responses triggered immediate automated education messages and/ or a subsequent nurse phone follow-up. Each call took 5-10 minutes. The mean number automated calls completed over 9 months was 21.9 (envisaged to be 39); mean number of call backs was 9.2.</p> <p>GVC:<br/>The GVC group received 90-minute monthly sessions over 9 months, with 6-10 participants, co-facilitated by a primary care physician and health educator. Participants in this group received bus tokens and snacks. Mean number of GMVs attended was 4.8 out of 9.</p> <p>There was no specific expectation regarding co-management with the primary care physician. In both interventions action plans regarding self management were generated (information in other papers).</p> <p>All participants received €15 and €25 dollars for the baseline and one year follow up assessment.</p> <p>Predominant EPOC intervention type: Patient-centred.</p> <p>Comparison: Usual care.</p> |
| <p>37</p> | <p>Sen<br/><br/>2014<br/><br/>USA</p> | <p>Financial incentives for home based monitoring- two interventions</p>                                                     | <p>Two intervention groups received financial incentives for home-based health monitoring. All three groups received three biometric devices, a self monitoring glucose device, a digital BP monitor and a device to automatically transmit readings from the biometric devices to the study website. All patients were instructed to use the biometric devices daily. In the intervention arms, participants who used all three devices on a given day were entered into a lottery to win something on the following day. In the daily lottery process, numbers between 0-99 were picked by the participant.</p> <p>In the high incentive intervention the average daily reward was €2.80; a two digit match (1: 100 chance) yielded a €100 award and a one digit match (1: 5 chance) yielded a €10 award.</p> <p>In the low incentive intervention, rewards were €50 and €5 respectively, expecting an average daily reward of €1.40.</p> <p>Each day all incentive arm participants were reminded by text message or email informing them of the lottery numbers. A study coordinator met with all participants at 3 and 6 months- participants were paid €25 for each visit.</p> <p>Episodes of care: daily</p> <p>Predominant EPOC intervention type: Financial</p> <p>Comparison: 'Daily home monitoring control group' received biometric devices.</p>                         |

|                                                                                                                                                                                                                                                        |    |                                 |                                                                 |                                                                                                                                                                                                                                                                                                                                                                                                                                                                                                                                                                                                                                                                                                                                                                                                                                                                                                                                                                                                                                                                                                                                                                                                                                                                                                                                                                                                                                                                                                                                                                                                                         |
|--------------------------------------------------------------------------------------------------------------------------------------------------------------------------------------------------------------------------------------------------------|----|---------------------------------|-----------------------------------------------------------------|-------------------------------------------------------------------------------------------------------------------------------------------------------------------------------------------------------------------------------------------------------------------------------------------------------------------------------------------------------------------------------------------------------------------------------------------------------------------------------------------------------------------------------------------------------------------------------------------------------------------------------------------------------------------------------------------------------------------------------------------------------------------------------------------------------------------------------------------------------------------------------------------------------------------------------------------------------------------------------------------------------------------------------------------------------------------------------------------------------------------------------------------------------------------------------------------------------------------------------------------------------------------------------------------------------------------------------------------------------------------------------------------------------------------------------------------------------------------------------------------------------------------------------------------------------------------------------------------------------------------------|
| 1<br>2<br>3<br>4<br>5<br>6<br>7                                                                                                                                                                                                                        | 38 | Sugiyama<br><br>2015<br><br>USA | Diabetes self-management education by trained health educators. | <p>Called the Diabetes Self-Care Study, the intervention involved community-based diabetes self-management education (DSME).</p> <p>All study participants were given glucose meters and testing strips, and received a 2-hour training on self-monitoring of blood glucose by a certified diabetes educator. Health educators, who delivered the education, completed a one-year training program and received 8 hours of curricula delivered by the study team about diabetes and its clinical presentations and complications. Additionally, they received 12 hours of training and implementation of the empowerment sessions.</p> <p>Length: Participants in the intervention group received six weekly two-hour group self-care sessions consisting of 8 to 10 persons per group, conducted in English or Spanish, and facilitated by health educators. In the group session, participants identified self-management challenges and discussed why each activity was challenging and how to solve it.</p> <p>Each participant also had a one-on-one session with the health educator to review his or her baseline and follow-up laboratory and biometric data during one of the group sessions.</p> <p>There was also a \$10 gift card for each assessment.</p> <p>Predominant EPOC intervention type: Patient</p> <p>Comparison: Usual care.</p>                                                                                                                                                                                                                                                                |
| 8<br>9<br>10<br>11<br>12<br>13<br>14<br>15<br>16<br>17<br>18<br>19<br>20<br>21<br>22<br>23<br>24<br>25<br>26<br>27<br>28<br>29<br>30<br>31<br>32<br>33<br>34<br>35<br>36<br>37<br>38<br>39<br>40<br>41<br>42<br>43<br>44<br>45<br>46<br>47<br>48<br>49 | 39 | Tang<br><br>2013<br><br>USA     | Online disease management of diabetes                           | <p>Online disease management of diabetes: Engaging and Motivating Patients online with Enhanced Resources- Diabetes (EMPOWER-D):</p> <p>A personalized healthcare program (PHCP) comprising nurse care managers authorized to change medications, multi-disciplinary team based care, patient self-management tools and an online communication channel between patients and their healthcare team. This intervention comprised:</p> <ol style="list-style-type: none"> <li>1/ Wireless glucometer uploading of information to the electronic health record</li> <li>2/ A diabetes summary sheet with a personalized action plan and treatment goals, including displaying the risk of a variety of diabetes related complications, medication information and monitoring information.</li> <li>3/ A nutrition log</li> <li>4/ Insulin record</li> <li>5/ Exercise log</li> <li>6/ Online communication/ messaging system</li> <li>7/ Nurse care managers who provide advice and can make medication changes.</li> <li>8/ Patient specific text and video educational material.</li> </ol> <p>On top of this, participants in the intervention group had 3 in-persons visits, firstly a 90 minute group visit introducing the online tools, a 90 minute 1:1 meeting with a nurse care manager to develop a shared care plan and 3/ a 60 minute visit with a registered dietician. Also a pharmacist reviewed all intervention group medications and made recommendations- they were also consulted throughout the trial.</p> <p>Predominant EPOC intervention type: Patient-centred.</p> <p>Comparison: Usual care.</p> |

|    |                       |                                                                                                                        |                                                                                                                                                                                                                                                                                                                                                                                                                                                                                                                                                                                                                                                                                                                                                                                                                                                                                                                                                                                                                 |
|----|-----------------------|------------------------------------------------------------------------------------------------------------------------|-----------------------------------------------------------------------------------------------------------------------------------------------------------------------------------------------------------------------------------------------------------------------------------------------------------------------------------------------------------------------------------------------------------------------------------------------------------------------------------------------------------------------------------------------------------------------------------------------------------------------------------------------------------------------------------------------------------------------------------------------------------------------------------------------------------------------------------------------------------------------------------------------------------------------------------------------------------------------------------------------------------------|
| 40 | Taylor<br>2003<br>USA | Nurse care management (NCM)                                                                                            | <p>Nurse care management (NCM): Initial 90 minute meeting with a registered nurse to review patient medications, lifestyle and psychosocial status. Self-management plan was developed.</p> <p>Then a weekly group class (1-2 hours with 4-10 per class) was scheduled for 4 weeks; including group discussion and problem solving.</p> <p>This was followed with telephone follow-up calls at week 4,5,8,12,16,20,28,36 and 44 (9 in total) from the nurse, averaging 15 minutes each. The nurse care managers gave advice as per agreed protocols. The PCP was called if a change in medication was recommended. The NCMs underwent specific training.</p> <p>Episodes of care: 5 visits and 9 telephone calls</p> <p>Predominant EPOC intervention type: Organisational.</p> <p>Comparison: Some educational materials, otherwise usual care.</p>                                                                                                                                                            |
| 41 | Thom<br>2013<br>USA   | Peer health coaching                                                                                                   | <p>Potential peer coaches attended 36 hours of training over 8 weeks using a curriculum developed by the study team- learning active listening, non-judgmental communication, helping with diabetes self-management skills, provision of support, assisting with lifestyle change, facilitating medication adherence and understanding and navigation of the health system. There was a written and oral assessment for these persons- those who passed became peer coaches.</p> <p>The peer coach- patient interaction was at the discretion of the patient and peer coach, either in person or by telephone contact, either outside or inside the clinic.</p> <p>The goal was for two telephone contacts every month and two or more in-person contacts over 6 months. They helped devise action plans for the patients.</p> <p>Peer coaches received €125 for training and €25 per client coached each month.</p> <p>Predominant EPOC intervention type: Patient-centred.</p> <p>Comparison: Usual care.</p> |
| 42 | Wild<br>2016<br>UK    | Supported telemonitoring involving twice-weekly self-measurement of glucose and transmission to a general practitioner | <p>The Telescot Diabetes Trial:</p> <p>Supervised, self-monitoring of glycaemic control, BP, and weight and telemetric transmission of measurements to the general practice team. A research nurse took all the baseline measures. Participants were given advice on lifestyle modification and how to contact the General Practice team.</p> <p>Length. The intervention lasted 9 months with the practice nurses checking patients' results weekly and organising changes in accordance with national guidelines.</p> <p>Predominant EPOC intervention type: Patient-centred</p> <p>Comparison: Usual general practice care</p>                                                                                                                                                                                                                                                                                                                                                                               |

Appendix 4:  
Risk of bias summary

|                       | Allocation concealment (selection bias) | Blinding of participants and personnel (performance bias) | Blinding of outcome assessment (detection bias) | Incomplete outcome data (attrition bias) | Selective reporting (reporting bias) | Other bias |
|-----------------------|-----------------------------------------|-----------------------------------------------------------|-------------------------------------------------|------------------------------------------|--------------------------------------|------------|
| Anzaldo-Campos 2016   | ?                                       | ?                                                         | ?                                               | ?                                        | ?                                    | ?          |
| Basudev 2017          | ?                                       | ?                                                         | ?                                               | ?                                        | ?                                    | ?          |
| Blackberry 2013       | ?                                       | ?                                                         | ?                                               | ?                                        | ?                                    | ?          |
| Capozza 2015          | ?                                       | ?                                                         | ?                                               | ?                                        | ?                                    | ?          |
| Choe 2005             | ?                                       | ?                                                         | ?                                               | ?                                        | ?                                    | ?          |
| Crowley 2015          | ?                                       | ?                                                         | ?                                               | ?                                        | ?                                    | ?          |
| Dale 2009             | ?                                       | ?                                                         | ?                                               | ?                                        | ?                                    | ?          |
| DeFue 2013            | ?                                       | ?                                                         | ?                                               | ?                                        | ?                                    | ?          |
| Edelman 2010          | ?                                       | ?                                                         | ?                                               | ?                                        | ?                                    | ?          |
| Edelman 2015          | ?                                       | ?                                                         | ?                                               | ?                                        | ?                                    | ?          |
| Farmer 2012           | ?                                       | ?                                                         | ?                                               | ?                                        | ?                                    | ?          |
| Forjoh 2014           | ?                                       | ?                                                         | ?                                               | ?                                        | ?                                    | ?          |
| Frosch 2011           | ?                                       | ?                                                         | ?                                               | ?                                        | ?                                    | ?          |
| Guerci 2003           | ?                                       | ?                                                         | ?                                               | ?                                        | ?                                    | ?          |
| Heisler 2010          | ?                                       | ?                                                         | ?                                               | ?                                        | ?                                    | ?          |
| Jacobs 2012           | ?                                       | ?                                                         | ?                                               | ?                                        | ?                                    | ?          |
| Jameson 2010          | ?                                       | ?                                                         | ?                                               | ?                                        | ?                                    | ?          |
| Jvannvir 2004         | ?                                       | ?                                                         | ?                                               | ?                                        | ?                                    | ?          |
| Keogh 2011            | ?                                       | ?                                                         | ?                                               | ?                                        | ?                                    | ?          |
| Kim 2009              | ?                                       | ?                                                         | ?                                               | ?                                        | ?                                    | ?          |
| Krein 2004            | ?                                       | ?                                                         | ?                                               | ?                                        | ?                                    | ?          |
| Long 2012             | ?                                       | ?                                                         | ?                                               | ?                                        | ?                                    | ?          |
| Maislos 2002          | ?                                       | ?                                                         | ?                                               | ?                                        | ?                                    | ?          |
| Mathers 2012          | ?                                       | ?                                                         | ?                                               | ?                                        | ?                                    | ?          |
| McDermott 2015        | ?                                       | ?                                                         | ?                                               | ?                                        | ?                                    | ?          |
| McMahon 2005          | ?                                       | ?                                                         | ?                                               | ?                                        | ?                                    | ?          |
| Mons 2013             | ?                                       | ?                                                         | ?                                               | ?                                        | ?                                    | ?          |
| O'Connor 2014         | ?                                       | ?                                                         | ?                                               | ?                                        | ?                                    | ?          |
| Odegard 2005          | ?                                       | ?                                                         | ?                                               | ?                                        | ?                                    | ?          |
| Palmas 2014           | ?                                       | ?                                                         | ?                                               | ?                                        | ?                                    | ?          |
| Phillis-Tsimikas 2011 | ?                                       | ?                                                         | ?                                               | ?                                        | ?                                    | ?          |
| Polonsky 2011         | ?                                       | ?                                                         | ?                                               | ?                                        | ?                                    | ?          |
| Protheroe 2016        | ?                                       | ?                                                         | ?                                               | ?                                        | ?                                    | ?          |
| Quinn 2011            | ?                                       | ?                                                         | ?                                               | ?                                        | ?                                    | ?          |
| Rothman 2005          | ?                                       | ?                                                         | ?                                               | ?                                        | ?                                    | ?          |
| Schillinger 2009      | ?                                       | ?                                                         | ?                                               | ?                                        | ?                                    | ?          |
| Sen 2014              | ?                                       | ?                                                         | ?                                               | ?                                        | ?                                    | ?          |
| Sugiyama 2015         | ?                                       | ?                                                         | ?                                               | ?                                        | ?                                    | ?          |
| Tano 2013             | ?                                       | ?                                                         | ?                                               | ?                                        | ?                                    | ?          |
| Taylor 2003           | ?                                       | ?                                                         | ?                                               | ?                                        | ?                                    | ?          |
| Thom 2013             | ?                                       | ?                                                         | ?                                               | ?                                        | ?                                    | ?          |
| Wild 2016             | ?                                       | ?                                                         | ?                                               | ?                                        | ?                                    | ?          |

209x278mm (300 x 300 DPI)



## Appendix 5: Overall quality assessment and predominant EPOC intervention type

| Study | Study_ID         | Year | Predominant EPOC intervention type | Overall quality assessment |
|-------|------------------|------|------------------------------------|----------------------------|
| 1     | Anzaldo-Campos   | 2016 | Patient                            | Low-risk                   |
| 2     | Basudev          | 2016 | Organisational                     | Low-risk                   |
| 3     | Blackberry       | 2009 | Patient                            | Low-risk                   |
| 4     | Capozza          | 2015 | Patient                            | Unclear-risk               |
| 5     | Choe             | 2012 | Organisational                     | Unclear-risk               |
| 6     | Crowley          | 2015 | Organisational                     | Low-risk                   |
| 7     | Dale             | 2003 | Patient                            | Unclear-risk               |
| 8     | DePue            | 2011 | Organisational                     | Low-risk                   |
| 9     | Edelman          | 2012 | Organisational                     | Low-risk                   |
| 10    | Edelman15        | 2015 | Organisational                     | Unclear-risk               |
| 11    | Farmer           | 2013 | Organisational                     | Low-risk                   |
| 12    | Forjough         | 2013 | Patient                            | High-risk                  |
| 13    | Frosch           | 2005 | Patient                            | Low-risk                   |
| 14    | Guerci           | 2013 | Patient                            | High-risk                  |
| 15    | Heisler          | 2010 | Patient                            | Unclear-risk               |
| 16    | Jacobs           | 2014 | Organisational                     | High-risk                  |
| 17    | Jameson          | 2011 | Organisational                     | Unclear-risk               |
| 18    | Jovanovic        | 2010 | Organisational                     | Low-risk                   |
| 19    | Keogh            | 2012 | Organisational                     | Low-risk                   |
| 20    | Kim              | 2010 | Patient                            | Low-risk                   |
| 21    | Krein            | 2004 | Organisational                     | Low-risk                   |
| 22    | Long             | 2009 | Patient                            | Unclear-risk               |
| 23    | Maislos          | 2004 | Organisational                     | High-risk                  |
| 24    | Mathers          | 2012 | Professional                       | Low-risk                   |
| 25    | McDermott        | 2015 | Organisational                     | Low-risk                   |
| 26    | McMahon          | 2004 | Organisational                     | Low-risk                   |
| 27    | Mons             | 2005 | Patient                            | Low-risk                   |
| 28    | O'Connor         | 2014 | Organisational                     | Low-risk                   |
| 29    | Odegard          | 2005 | Organisational                     | Unclear-risk               |
| 30    | Palmas           | 2014 | Patient                            | Low-risk                   |
| 31    | Phillis-Tsimikas | 2011 | Patient                            | Unclear-risk               |
| 32    | Polonsky         | 2011 | Patient                            | Unclear-risk               |
| 33    | Protheroe        | 2016 | Organisational                     | Unclear-risk               |
| 34    | Quinn            | 2011 | Patient                            | Low-risk                   |
| 35    | Rothman          | 2005 | Organisational                     | Low-risk                   |
| 36    | Schillinger      | 2009 | Patient                            | Low-risk                   |
| 37    | Sen              | 2014 | Financial                          | Low-risk                   |
| 38    | Sugiyama         | 2015 | Patient                            | Low-risk                   |
| 39    | Tang             | 2013 | Patient                            | Low-risk                   |
| 40    | Taylor           | 2003 | Organisational                     | Unclear-risk               |
| 41    | Thom             | 2013 | Patient                            | Unclear-risk               |
| 41    | Wild             | 2016 | Patient                            | Low-risk                   |

1  
2  
3  
4  
5  
6  
7  
8  
9  
10  
11  
12  
13  
14  
15  
16  
17  
18  
19  
20  
21  
22  
23  
24  
25  
26  
27  
28  
29  
30  
31  
32  
33  
34  
35  
36  
37  
38  
39  
40  
41  
42  
43  
44  
45  
46  
47  
48  
49  
50  
51  
52  
53  
54  
55  
56  
57  
58  
59  
60

**Appendix 6a:**

**Funnel plot of studies included in the HbA1c analysis**

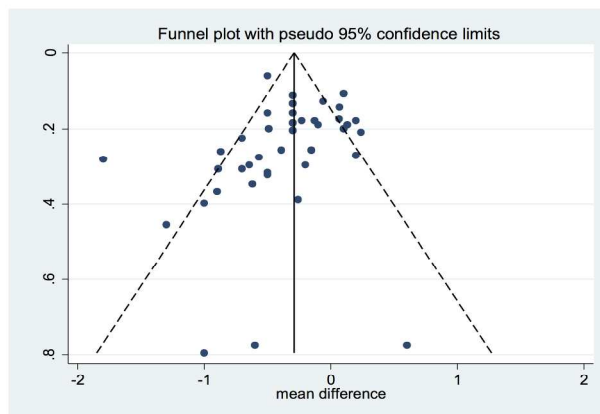

**Funnel plot of studies included in the DBP analysis**

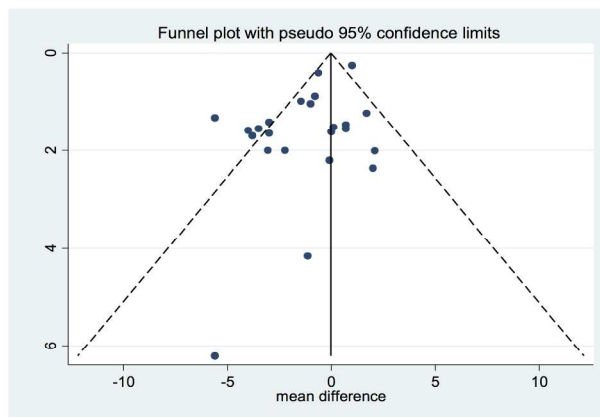

215x279mm (300 x 300 DPI)

1  
2  
3  
4  
5  
6  
7  
8  
9  
10  
11  
12  
13  
14  
15  
16  
17  
18  
19  
20  
21  
22  
23  
24  
25  
26  
27  
28  
29  
30  
31  
32  
33  
34  
35  
36  
37  
38  
39  
40  
41  
42  
43  
44  
45  
46  
47  
48  
49  
50  
51  
52  
53  
54  
55  
56  
57  
58  
59  
60

**Appendix 6b:**  
**Funnel plot of studies included in the SBP analysis**

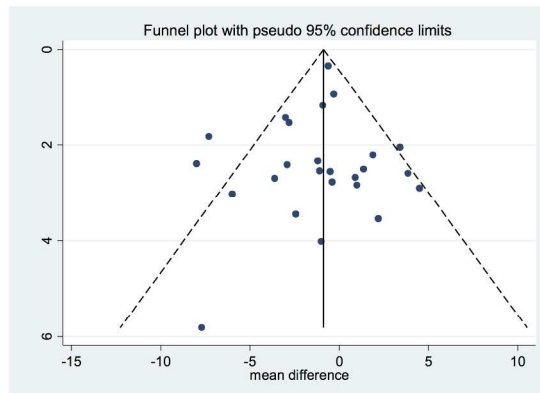

**Funnel plot of studies included in the lipid analysis**

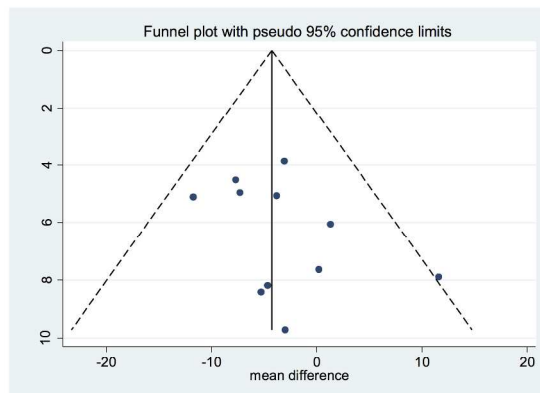

209x297mm (300 x 300 DPI)

1  
2  
3  
4  
5  
6  
7  
8  
9  
10  
11  
12  
13  
14  
15  
16  
17  
18  
19  
20  
21  
22  
23  
24  
25  
26  
27  
28  
29  
30  
31  
32  
33  
34  
35  
36  
37  
38  
39  
40  
41  
42  
43  
44  
45  
46  
47  
48  
49  
50  
51  
52  
53  
54  
55  
56  
57  
58  
59  
60

**Appendix 7: Effects of interventions on HbA1c, with TeleHealth subgroups**

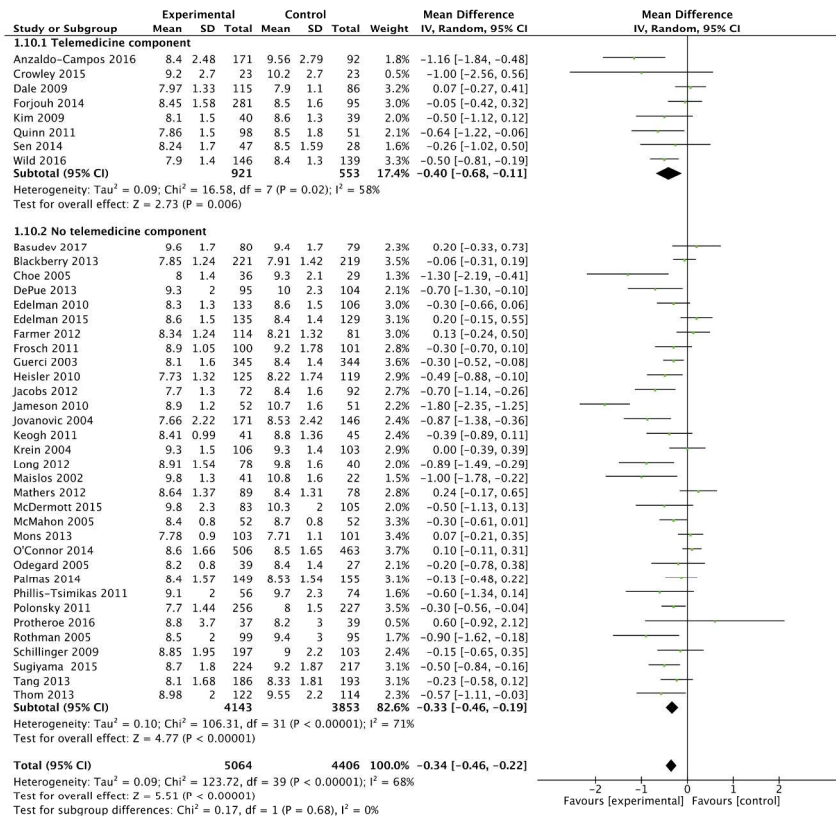

209x278mm (300 x 300 DPI)

1  
2  
3  
4  
5  
6  
7  
8  
9  
10  
11  
12  
13  
14  
15  
16  
17  
18  
19  
20  
21  
22  
23  
24  
25  
26  
27  
28  
29  
30  
31  
32  
33  
34  
35  
36  
37  
38  
39  
40  
41  
42  
43  
44  
45  
46  
47  
48  
49  
50  
51  
52  
53  
54  
55  
56  
57  
58  
59  
60

**Appendix 8: Effects of interventions on systolic blood pressure**

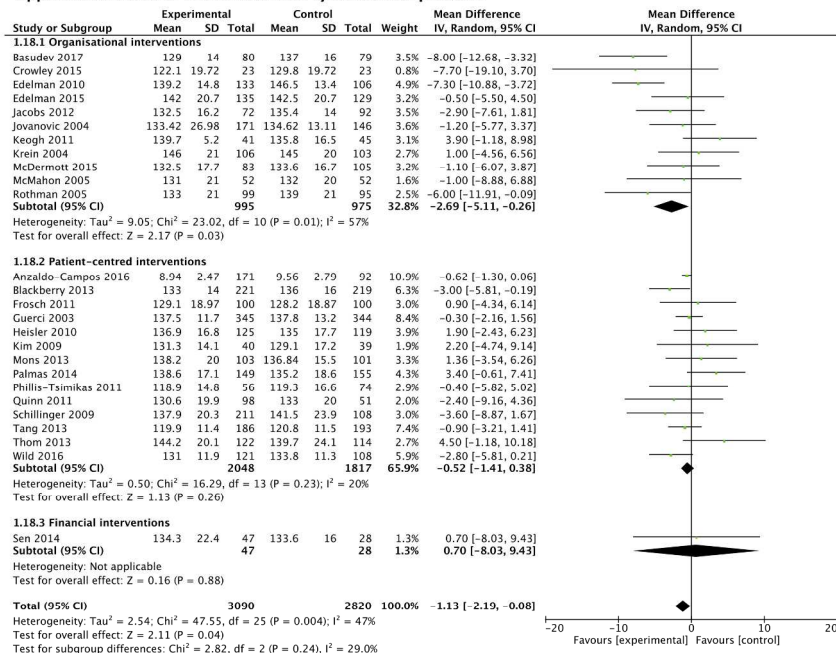

209x278mm (300 x 300 DPI)

1  
2  
3  
4  
5  
6  
7  
8  
9  
10  
11  
12  
13  
14  
15  
16  
17  
18  
19  
20  
21  
22  
23  
24  
25  
26  
27  
28  
29  
30  
31  
32  
33  
34  
35  
36  
37  
38  
39  
40  
41  
42  
43  
44  
45  
46  
47  
48  
49  
50  
51  
52  
53  
54  
55  
56  
57  
58  
59  
60

**Appendix 9: Effects of interventions on diastolic blood pressure**

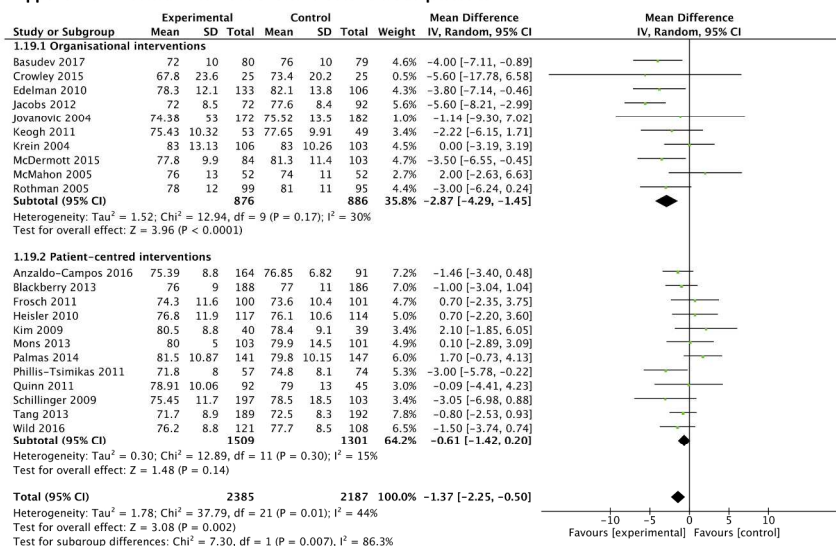

209x278mm (300 x 300 DPI)

1  
2  
3  
4  
5  
6  
7  
8  
9  
10  
11  
12  
13  
14  
15  
16  
17  
18  
19  
20  
21  
22  
23  
24  
25  
26  
27  
28  
29  
30  
31  
32  
33  
34  
35  
36  
37  
38  
39  
40  
41  
42  
43  
44  
45  
46  
47  
48  
49  
50  
51  
52  
53  
54  
55  
56  
57  
58  
59  
60

**Appendix 10: Effects of interventions on Total Cholesterol**

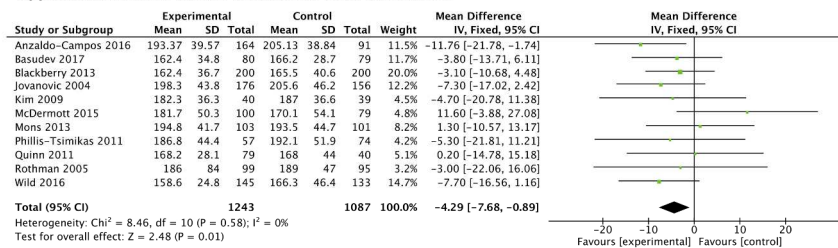

209x278mm (300 x 300 DPI)

## Appendix 11: Secondary outcomes measured and results

| Number | Study           | Mental health outcomes                                                                                                                                                                                    | Psychosocial outcomes                                                                                                                                                                                                                                                                                                                                                                                                                                                                                                                                                                                                                                                                                                                                                                                                                                                                                       | Adherence outcomes | Other physical outcomes                                                                                                                                                                                                                                                                                                                                                                                                        | Healthcare utilisation outcomes | Medication related outcomes                             |
|--------|-----------------|-----------------------------------------------------------------------------------------------------------------------------------------------------------------------------------------------------------|-------------------------------------------------------------------------------------------------------------------------------------------------------------------------------------------------------------------------------------------------------------------------------------------------------------------------------------------------------------------------------------------------------------------------------------------------------------------------------------------------------------------------------------------------------------------------------------------------------------------------------------------------------------------------------------------------------------------------------------------------------------------------------------------------------------------------------------------------------------------------------------------------------------|--------------------|--------------------------------------------------------------------------------------------------------------------------------------------------------------------------------------------------------------------------------------------------------------------------------------------------------------------------------------------------------------------------------------------------------------------------------|---------------------------------|---------------------------------------------------------|
| 1      | Anzaoldo-Campos | Depression (PHQ-9): Unclear of MD between two intervention groups (PD or PD-TE groups) and control group. Unadjusted MD was -1.83 favouring the PD group to control and -1.84 for PD-TE group to control. | Self efficacy (Spanish Self-Efficacy): Unclear of MD between two intervention groups (PD or PD-TE groups) and control group. Unadjusted MD was -2.42 favouring the PD group to control and -0.54 for PD-TE group compared to control.<br><br>Lifestyle (IMEVID): Unclear of MD between two intervention groups (PD or PD-TE groups) and control group. Unadjusted MD was 2.3 favouring the PD group to control and 2.7 favouring the PD-TE group to control.<br><br>Quality of life (Diabetes 39): Unclear of MD between two intervention groups (PD or PD-TE groups) and control group. Unadjusted MD was -8.88 favouring the PD group to control and -4.87 favouring the PD-TE group to control.<br><br>Diabetes knowledge (DKQ24): Unclear of MD between two intervention groups (PD or PD-TE groups) and control group. Unadjusted MD was 2.05 favouring the PD group to control and 2.09 favouring the |                    | Triacylglyceride: Unclear of MD between two intervention groups (PD or PD-TE groups) and control group.. Unadjusted MD was -21.46 favouring the PD group to control and -4.55 for PD-TE group compared to control.<br><br>BMI: Unclear of MD between two intervention groups (PD or PD-TE groups) and control group.. Unadjusted MD was +0.33 comparing the PD group to control and +0.31 for PD-TE group compared to control. |                                 | Significantly higher insulin use in PD and PD-TE groups |



1  
2  
3  
4  
5  
6  
7  
8  
9  
10  
11  
12  
13  
14  
15  
16  
17  
18  
19  
20  
21  
22  
23  
24  
25  
26  
27  
28  
29  
30  
31  
32  
33  
34  
35  
36  
37  
38  
39  
40  
41  
42  
43  
44  
45  
46  
47  
48  
49

|   |            |                                                    |                                                                                                                                                                                                   |  |                                             |                                                                                                                                                                                                                              |                                                                                                                                                                                                                   |
|---|------------|----------------------------------------------------|---------------------------------------------------------------------------------------------------------------------------------------------------------------------------------------------------|--|---------------------------------------------|------------------------------------------------------------------------------------------------------------------------------------------------------------------------------------------------------------------------------|-------------------------------------------------------------------------------------------------------------------------------------------------------------------------------------------------------------------|
|   |            |                                                    | PD-TE group to control.                                                                                                                                                                           |  |                                             |                                                                                                                                                                                                                              |                                                                                                                                                                                                                   |
| 2 | Basudev    |                                                    |                                                                                                                                                                                                   |  | Weight MD 0 (p = NS)<br>eGFR -3.9 (p = 0.1) | Care destination: NS change<br>Frequency of contact: NS change                                                                                                                                                               | Medication change: 54% of intervention group had a change in glycaemic medication versus 46% in the control group (p=0.04). No other significant change in medications.<br><br>Medication optimization: NS change |
| 3 | Blackberry | Major depression<br>1.09 (0.49 to 2.46)<br>p= 0.83 | Quality of life 0.02 (CI -0.01 to 0.05) p =0.16<br><br>Diabetes self efficacy -0.06 (CI - 2.22 to 2.10) p 0.96<br><br>Diabetes support -0.09 (CI - 0.01 to 0.18) p 0.08                           |  |                                             |                                                                                                                                                                                                                              |                                                                                                                                                                                                                   |
| 4 | Capozza    |                                                    | Patient interaction and satisfaction (CSQ8) with the program by means of survey-intervention patients all scoring over 3 on a four point satisfaction scale. No clear comparison with usual care. |  |                                             |                                                                                                                                                                                                                              |                                                                                                                                                                                                                   |
| 5 | Choe       |                                                    |                                                                                                                                                                                                   |  |                                             | Process measures:<br>(% before, % after, p value)<br><br>Rate of HbA1c measurement: 82.9% 92.3% 0.21<br><br>Dilated retinal examination: 74.3% 97.3% p= 0.004<br><br>Urine ACR or use of ACE Inhibitors: 85.7% 94.9% p= 0.18 |                                                                                                                                                                                                                   |

|   |         |                                                          |                                                                                                                                                                                                                                                                                                                                                                                                                                                                                                                                                                                                                                    |                                                                                                      |                                                                                                                                                                                                                                                                                                                                                                                |                                                                                                  |  |
|---|---------|----------------------------------------------------------|------------------------------------------------------------------------------------------------------------------------------------------------------------------------------------------------------------------------------------------------------------------------------------------------------------------------------------------------------------------------------------------------------------------------------------------------------------------------------------------------------------------------------------------------------------------------------------------------------------------------------------|------------------------------------------------------------------------------------------------------|--------------------------------------------------------------------------------------------------------------------------------------------------------------------------------------------------------------------------------------------------------------------------------------------------------------------------------------------------------------------------------|--------------------------------------------------------------------------------------------------|--|
|   |         |                                                          |                                                                                                                                                                                                                                                                                                                                                                                                                                                                                                                                                                                                                                    |                                                                                                      |                                                                                                                                                                                                                                                                                                                                                                                | Monofilament testing for diabetic neuropathy by chart review over 24 months: 62.9% 92.3% p=0.002 |  |
| 6 | Crowley | Depression (PHQ-9): mean difference was not significant. | Diabetes self-management (Self-care inventory revised) SCI-R: mean difference was +7.0 (p=0.047) in favour of intervention                                                                                                                                                                                                                                                                                                                                                                                                                                                                                                         | Self reported medication adherence (Morisky medication adherence scale 4): nonsignificant difference |                                                                                                                                                                                                                                                                                                                                                                                | Adverse events similar in both groups                                                            |  |
| 7 | Dale    |                                                          | <p>Diabetes distress (PAID) adjusted score showed no significant difference for two intervention groups versus control.</p> <p>Self efficacy (DMSES) adjusted score showed no significant difference for two intervention groups versus control. PS-CG, +4.17, p=0.28 DSN-CG, +0.38, p=0.94.</p> <p>Self efficacy (DMSES) improved for the patients in the peer support group but there were no significant differences between groups; diabetes related problems (PAID) reduced for those in the diabetes nurse specialists group. In all groups the HbA1c improved, but there were no significant differences between groups</p> |                                                                                                      | <p>Normal ACR: 1.05 (0.62 to 1.75) p= 0.87</p> <p>Normal eGFR: 0.92 (0.55 to 1.53) p 0.76</p> <p>Current smoker 0.043 (0.55 to 1.53) p 0.72</p> <p>Healthy weight (BMI&lt;25) 2.19 (1.1 to 4.38) p=0.03</p> <p>Weight 0.12 (-1.53 to 1.77) p=0.89</p> <p>Waist circumference Men 0.90 (-1.40 to 3.19) p=0.44</p> <p>Waist circumference Women -1.52 (-4.08 to 1.04) p=0.24</p> |                                                                                                  |  |
| 8 | DePue   |                                                          | Mean perceived competence score significant difference 1.6 (CI: 0.9 to 2.4) p< 0.001                                                                                                                                                                                                                                                                                                                                                                                                                                                                                                                                               | Adherence: self reported medication adherence                                                        |                                                                                                                                                                                                                                                                                                                                                                                |                                                                                                  |  |

1  
2  
3  
4  
5  
6  
7  
8  
9  
10  
11  
12  
13  
14  
15  
16  
17  
18  
19  
20  
21  
22  
23  
24  
25  
26  
27  
28  
29  
30  
31  
32  
33  
34  
35  
36  
37  
38  
39  
40  
41  
42  
43  
44  
45  
46  
47  
48  
49

|    |              |  |                                                                                                                                                                                                                                                                                                                              |                                                                                                                                      |                                                         |                                                                                                             |                                                                                                                                                                                                                                         |
|----|--------------|--|------------------------------------------------------------------------------------------------------------------------------------------------------------------------------------------------------------------------------------------------------------------------------------------------------------------------------|--------------------------------------------------------------------------------------------------------------------------------------|---------------------------------------------------------|-------------------------------------------------------------------------------------------------------------|-----------------------------------------------------------------------------------------------------------------------------------------------------------------------------------------------------------------------------------------|
|    |              |  | Physical activity Adapted measures of diabetes beliefs; no data reported.                                                                                                                                                                                                                                                    | Nonsignificant difference.                                                                                                           |                                                         |                                                                                                             |                                                                                                                                                                                                                                         |
| 9  | Edelman 2010 |  | Self-efficacy using the Perceived Competence Scale<br><br>Nonsignificant difference                                                                                                                                                                                                                                          | Adherence to medications ???<br>Morisky self-reported medication adherence scale<br><br>Nonsignificant difference                    | BMI nonsignificant differences                          | Adverse events through structured self report and medical record review<br>Health utilization Cost data     |                                                                                                                                                                                                                                         |
| 10 | Edelman 2015 |  | Self-efficacy- but no report in Results section<br>Health literacy- but no report in Results section.                                                                                                                                                                                                                        | Medication adherence (via self report) - but no report in Results section.                                                           | No significant differences weight or physical activity. | 45.2% of intervention group had GP management plan for diabetes V's 35.5% of controls (non-significant)     |                                                                                                                                                                                                                                         |
| 11 | Farmer       |  | Functional status as per SF 12<br><br>Physical and SF 12 Mental<br>Diabetes treatment satisfaction and satisfaction with nurse<br><br><u>SF 12 Physical</u><br>46.3 (9.0) V's 44.6 (11.1)<br><br>MD -0.7 (CI -2.7, 1.4) p = 0.52<br><br><u>SF 12 Mental</u><br>49.5 (10.4) V's 52.6 (8.8)<br>MD -1.6 (CI -3.9, 0.6) p = 0.15 | MARS Self reported adherence (range 5-25) with a higher score indicating higher levels of adherence<br><br>Nonsignificant difference | BMI dietary nonsignificant difference.                  | % reporting hypoglycaemia nonsignificant difference<br><br>Treatment satisfaction nonsignificant difference | Primary outcome<br>% days over a 12 week period on which the correct number of doses of main glucose lowering medication was taken each day as prescribed.<br><br>77.4% (26.3) & days taking correct dose V's 69% = 8.4% MD (P = 0.044) |
| 12 | Forjough     |  | Self care data not given                                                                                                                                                                                                                                                                                                     |                                                                                                                                      |                                                         |                                                                                                             |                                                                                                                                                                                                                                         |
| 13 | Frosch       |  | Diabetes knowledge: (23 point Diabetes knowledge test) - nonsignificant difference.<br><br>Self-care behaviours (SDSCA) - nonsignificant difference                                                                                                                                                                          |                                                                                                                                      |                                                         |                                                                                                             | Prescribed medications measured: taking most prescribed medications (P = .01; interaction, P = .41), and taking all prescribed medications (P = .001; interaction, P = .75).                                                            |

|    |           |  |                                                                                                                                                                                                                       |                                                                                                                                                              |                                                                                                |                                                                                                            |                                                                                                                                       |
|----|-----------|--|-----------------------------------------------------------------------------------------------------------------------------------------------------------------------------------------------------------------------|--------------------------------------------------------------------------------------------------------------------------------------------------------------|------------------------------------------------------------------------------------------------|------------------------------------------------------------------------------------------------------------|---------------------------------------------------------------------------------------------------------------------------------------|
|    |           |  | Diabetes knowledge and behavioural outcomes by group over time: Exercise was statistically significantly reduced                                                                                                      |                                                                                                                                                              |                                                                                                |                                                                                                            | Nonsignificant difference.                                                                                                            |
| 14 | Guerci    |  |                                                                                                                                                                                                                       |                                                                                                                                                              |                                                                                                | Symptomatic hyoglycaemia<br>Any hypoglycaemia: 53 (10.4%) in SMBG and 25 (5.2%) in control p= 0.003        | Medications nonsignificant difference                                                                                                 |
| 15 | Heisler   |  | Diabetes social support score - nonsignificant difference<br><br>Diabetes distress Diabetes QoL -nonsignificant difference                                                                                            | Medication adherence nonsignificant difference<br><br>Medication intensification: Significant increase in insulin and oral diabetic medication prescribing . | BMI nonsignificant difference                                                                  |                                                                                                            | Medication intensification: Significant increase in insulin and oral diabetic medication prescribing .                                |
| 16 | Jacobs    |  |                                                                                                                                                                                                                       |                                                                                                                                                              | Weight and diet nonsignificant difference                                                      | Intervention group had more screening parameters performed (retinal screening, nephropathy and neuropathy) | Medication sse; intervention group had higher use of antiplatelet, diabetic and statin medications.                                   |
| 17 | Jameson   |  |                                                                                                                                                                                                                       |                                                                                                                                                              |                                                                                                |                                                                                                            | Intervention group- 28.8% commenced basal bolus insulin V's 1 (2%) patient in the control group.                                      |
| 18 | Jovanovic |  |                                                                                                                                                                                                                       |                                                                                                                                                              | HbA1c < 7%<br>35% V's 21% (but p = 0105)                                                       |                                                                                                            | Medication usage Increase in oral agents in intervention group, without any increase in numbers on insulin. Control group- no change. |
| 19 | Keogh     |  | The intervention group reported better personal control, a better understanding of diabetes and an increased belief in treatment effectiveness. They also had fewer symptoms and lower levels of diabetes concern and |                                                                                                                                                              | Statistically more patients in intervention group achieved at least 1.0% improvement in HbA1c. |                                                                                                            |                                                                                                                                       |

1  
2  
3  
4  
5  
6  
7  
8  
9  
10  
11  
12  
13  
14  
15  
16  
17  
18  
19  
20  
21  
22  
23  
24  
25  
26  
27  
28  
29  
30  
31  
32  
33  
34  
35  
36  
37  
38  
39  
40  
41  
42  
43  
44  
45  
46  
47  
48  
49

|    |     |                                                                                                                                                                                   |                                                                                                                                                                                                                                                                                                                                                                                                                                                                                                                                                                                                                                                  |  |                                                                                                                                                                                                                                                    |  |  |
|----|-----|-----------------------------------------------------------------------------------------------------------------------------------------------------------------------------------|--------------------------------------------------------------------------------------------------------------------------------------------------------------------------------------------------------------------------------------------------------------------------------------------------------------------------------------------------------------------------------------------------------------------------------------------------------------------------------------------------------------------------------------------------------------------------------------------------------------------------------------------------|--|----------------------------------------------------------------------------------------------------------------------------------------------------------------------------------------------------------------------------------------------------|--|--|
|    |     |                                                                                                                                                                                   | <p>distress. They also had better psychological well being, adherence to lifestyle factors, self efficacy and family support.</p> <p>Illness perceptions (Brief illness Perception Questionnaire)- statistically significant improvement</p> <p>Psychological wellbeing (12-item Well-Being questionnaire)- statistically significant improvement</p> <p>Diabetes self management (Summary of Diabetes Self-care Activities Questionnaire) Self Efficacy (UK version Diabetes Self-Efficacy Scale)- statistically significant improvement</p> <p>Family support (Diabetes Family Behaviour Checklist)- statistically significant improvement</p> |  |                                                                                                                                                                                                                                                    |  |  |
| 20 | Kim | <p>Depression (Kim Depression Scale for Korean Americans) nonsignificant difference</p> <p>Quality of Life (Diabetes Quality of Life Measure (DQOL) nonsignificant difference</p> | <p>Diabetes knowledge test (DKT) statistically significant difference</p> <p>Self efficacy (Stanford Chronic Disease Self-Efficacy scale) statistically significant difference</p> <p>Self care (Diabetes self care activitiis (SDSCA) statistically significant difference</p>                                                                                                                                                                                                                                                                                                                                                                  |  | <p>% participants achieving HbA1c goals</p> <p>% participants achieving HbA1c goals &amp; achieving HbA1c less 6.5, 7 and 7.5 greater in intervention group (Fig 3). statistically significant. But data not shown.</p> <p>BMI- nonsignificant</p> |  |  |

|    |         |  |                                                                                                                                                                                                                                                                                                                                                                                                                                                             |  |                               |                                                                                                                                                                                       |                                                                                   |
|----|---------|--|-------------------------------------------------------------------------------------------------------------------------------------------------------------------------------------------------------------------------------------------------------------------------------------------------------------------------------------------------------------------------------------------------------------------------------------------------------------|--|-------------------------------|---------------------------------------------------------------------------------------------------------------------------------------------------------------------------------------|-----------------------------------------------------------------------------------|
|    |         |  |                                                                                                                                                                                                                                                                                                                                                                                                                                                             |  | difference                    |                                                                                                                                                                                       |                                                                                   |
| 21 | Krein   |  | General satisfaction score and rating of diabetes provider score was marginally better and statistically better in the intervention group.                                                                                                                                                                                                                                                                                                                  |  | BMI nonsignificant difference |                                                                                                                                                                                       |                                                                                   |
| 22 | Long    |  |                                                                                                                                                                                                                                                                                                                                                                                                                                                             |  | BMI nonsignificant difference | Uptake of intervention<br>Peer mentoring: Aiming to have 4 calls per month for 6 months. The Results showed 38% mentors talked 4 times per month and by Month 6, that reduced to 16%. | No difference in hypoglycaemia                                                    |
| 23 | Maisios |  |                                                                                                                                                                                                                                                                                                                                                                                                                                                             |  |                               | Adherence to follow up: 41/48 and 23/34 patients returned for follow up. 29% intervention group non-compliant.                                                                        | Use of insulin nonsignificant difference<br>INT: 25% to 40%<br>CONTROL: 15 to 17% |
| 24 | Mathers |  | Decisional conflict:<br><br>Mean difference between intervention and control groups on the total score for decisional conflict on the total score was -7.72 (CI -12.5, -2.97)<br><br>Realistic expectations: Were better in intervention group<br><br>Preferred option: - Proportion undecided: No significant difference<br><br>Participation in decision-making: Statistically significant difference, intervention group had higher participation rates. |  |                               |                                                                                                                                                                                       |                                                                                   |

1  
2  
3  
4  
5  
6  
7  
8  
9  
10  
11  
12  
13  
14  
15  
16  
17  
18  
19  
20  
21  
22  
23  
24  
25  
26  
27  
28  
29  
30  
31  
32  
33  
34  
35  
36  
37  
38  
39  
40  
41  
42  
43  
44  
45  
46  
47  
48  
49

1  
2  
3  
4  
5  
6  
7  
8  
9  
10  
11  
12  
13  
14  
15  
16  
17  
18  
19  
20  
21  
22  
23  
24  
25  
26  
27  
28  
29  
30  
31  
32  
33  
34  
35  
36  
37  
38  
39  
40  
41  
42  
43  
44  
45  
46  
47  
48  
49

|    |           |                                                                                       |                                                                                                                                                                                             |                                                                                                                                                                                                                                              |                                                                                       |                                                                                                                                                             |                                                                         |
|----|-----------|---------------------------------------------------------------------------------------|---------------------------------------------------------------------------------------------------------------------------------------------------------------------------------------------|----------------------------------------------------------------------------------------------------------------------------------------------------------------------------------------------------------------------------------------------|---------------------------------------------------------------------------------------|-------------------------------------------------------------------------------------------------------------------------------------------------------------|-------------------------------------------------------------------------|
|    |           |                                                                                       | Regret score. No significant difference.                                                                                                                                                    |                                                                                                                                                                                                                                              |                                                                                       |                                                                                                                                                             |                                                                         |
|    |           |                                                                                       | Acceptability: Most found PDA useful.                                                                                                                                                       |                                                                                                                                                                                                                                              |                                                                                       |                                                                                                                                                             |                                                                         |
| 25 | McDermott |                                                                                       | Test of Functional Health Literacy for Adults (TOFHLA)- unclear if significant result present<br><br>Assessment of Quality of Life (AQoL) instrument- unclear if significant result present | Waitlist patients had better self-report adherence<br><br>Adherence: SS reduction                                                                                                                                                            | Slight non-significant reductions in rest of other physical outcomes (BMI, ACR, eGFR) | Intervention group patients statistically significantly more likely to have seen a dietician and dentist, be taking inculin and have influenza vaccination. |                                                                         |
| 26 | McMahon   |                                                                                       |                                                                                                                                                                                             |                                                                                                                                                                                                                                              |                                                                                       | Frequency of data uploads on web-based care management system (used to look at effect on HbA1c primary outcome)                                             |                                                                         |
| 27 | Mons      | Symptoms of depression: Geriatric depression scale GDS: No difference between groups. | Health related quality of life (Short Form General Health Survey: SF-12)<br><br>No difference <u>between</u> groups at 12 months.<br><br>Statistically significant change at 18 months.     |                                                                                                                                                                                                                                              |                                                                                       |                                                                                                                                                             |                                                                         |
| 28 | O'Connor  |                                                                                       |                                                                                                                                                                                             | No significant difference between groups regarding medication adherence (one prescription fill within 60 days of prescription date)- 88% in intervention group vs 86% in control group.<br><br>Similarly there was no significant difference |                                                                                       |                                                                                                                                                             | Medication persistence (two or more prescription fills within 180 days) |

|    |                  |                                                                                                                       |                                                                                                                      |                                                                                                  |  |                                                                                                                                                                                                                                                                                                                                                                                                                                                                               |                                                                                |
|----|------------------|-----------------------------------------------------------------------------------------------------------------------|----------------------------------------------------------------------------------------------------------------------|--------------------------------------------------------------------------------------------------|--|-------------------------------------------------------------------------------------------------------------------------------------------------------------------------------------------------------------------------------------------------------------------------------------------------------------------------------------------------------------------------------------------------------------------------------------------------------------------------------|--------------------------------------------------------------------------------|
|    |                  |                                                                                                                       |                                                                                                                      | between groups regarding medication persistence (two or more prescription fills within 180 days) |  |                                                                                                                                                                                                                                                                                                                                                                                                                                                                               |                                                                                |
| 29 | Odegard          |                                                                                                                       |                                                                                                                      | No improvement on self reported adherence.                                                       |  |                                                                                                                                                                                                                                                                                                                                                                                                                                                                               | No significant difference in MAI (medication appropriateness) at end of study. |
| 30 | Palmas           |                                                                                                                       |                                                                                                                      |                                                                                                  |  |                                                                                                                                                                                                                                                                                                                                                                                                                                                                               |                                                                                |
| 31 | Phillis-Tsimikas | Self management behaviours and Depression (in separate publication) - not published at time of search so not included | Self management behaviours and Depression (in separate publication)- not published at time of search so not included |                                                                                                  |  |                                                                                                                                                                                                                                                                                                                                                                                                                                                                               |                                                                                |
| 32 | Polonsky         |                                                                                                                       | GWB WHO-5 - nonsignificant difference                                                                                |                                                                                                  |  | <p>Treatment intensification</p> <p>Changes in treatment: 75.5% of STG patients received a medication change at month 1 V's 28% of ACG patients (p &lt;0.0001).</p> <p>Twice as many STB patients started on insulin between month 1 and 12. Heightened attention paid to subjects.</p> <p>Free meters: Requirement to bring meters to all study visits</p> <p>More frequent study visits<br/>STG physicians trained on a treatment algorithm<br/>SMBG: Lower test use in</p> |                                                                                |

1  
2  
3  
4  
5  
6  
7  
8  
9  
10  
11  
12  
13  
14  
15  
16  
17  
18  
19  
20  
21  
22  
23  
24  
25  
26  
27  
28  
29  
30  
31  
32  
33  
34  
35  
36  
37  
38  
39  
40  
41  
42  
43  
44  
45  
46  
47  
48  
49



1  
2  
3  
4  
5  
6  
7  
8  
9  
10  
11  
12  
13  
14  
15  
16  
17  
18  
19  
20  
21  
22  
23  
24  
25  
26  
27  
28  
29  
30  
31  
32  
33  
34  
35  
36  
37  
38  
39  
40  
41  
42  
43  
44  
45  
46  
47  
48  
49

|    |             |                                                                                                                                                                       |                                                                                                                                                                                                                                                                                                                                                                                                                                                   |  |                                          |                                                                                                                                                                                                                                                                      |  |
|----|-------------|-----------------------------------------------------------------------------------------------------------------------------------------------------------------------|---------------------------------------------------------------------------------------------------------------------------------------------------------------------------------------------------------------------------------------------------------------------------------------------------------------------------------------------------------------------------------------------------------------------------------------------------|--|------------------------------------------|----------------------------------------------------------------------------------------------------------------------------------------------------------------------------------------------------------------------------------------------------------------------|--|
|    |             |                                                                                                                                                                       |                                                                                                                                                                                                                                                                                                                                                                                                                                                   |  |                                          | STG group (0.77) V's ACG group 1.05 (nonsignificant difference)                                                                                                                                                                                                      |  |
| 33 | Protheroe   | Warwick- Edinburgh Mental Well-Being: Adjusted MD was - 0.17 (p=0.87)<br><br>Health Status Measure (from Sf12) Adjusted MD for mental health score was 5.46 (p=0.049) | Diabetes self care (Summary of Diabetes Self-Care Activities Measure) : Adjusted MD was 0.33 (p=0.2)<br><br>Diabetes Quality of Life (Diabetes Quality of Life Inventory) : Adjusted MD was - 4.24 (p=0.46)<br><br>Diabetes UK Scale Items: Adjusted MD was 0.4 (p=0.22)<br><br>Health-related Quality of Life (EQ5D) : Adjusted MD was 0.1 (p=0.135)<br><br>Illness Perception (Brief Illness Perception Score) : Adjusted MD was -5.74 (p=0.04) |  |                                          | No significant difference in resource use (inpatient nights, Emergency Department visits, Outpatient visits, GP visits or practice nurse visits)                                                                                                                     |  |
| 34 | Quinn       | PHQ-9 depression - nonsignificant difference                                                                                                                          | Diabetes distress scale - nonsignificant difference<br><br>Diabetes diabetes inventory - nonsignificant difference                                                                                                                                                                                                                                                                                                                                |  | BMI unclear if statistically significant | Hypoglycaemic events and hospitalizations were infrequent in all groups.                                                                                                                                                                                             |  |
| 35 | Rothman     |                                                                                                                                                                       | Diabetes knowledge Satisfaction:<br><br>(Diabetes Treatment Satisfaction Questionnaire) MD in scores (INT V's control)<br><br>Diabetes knowledge: +14 (CI 9 to 20)<br><br>Diabetes treatment satisfaction +3 (CI 1 to 6) statistically significant reduction                                                                                                                                                                                      |  |                                          | Process measures (time spent with patients) and medication changes. But did not factor in any changes made by PCP. Aspirin use higher in intervention group at 12 months. Statin use equal. No statistically significant increase in services in intervention group. |  |
| 36 | Schillinger |                                                                                                                                                                       | SF-12 instrument for QoL                                                                                                                                                                                                                                                                                                                                                                                                                          |  |                                          | Functional outcomes:                                                                                                                                                                                                                                                 |  |

|    |     |  |                                                                                                                                                                                                                                                                                                                                                                                                                                                                                                                                   |  |  |                                                                                                                                                                                                                                                                                                                                |  |
|----|-----|--|-----------------------------------------------------------------------------------------------------------------------------------------------------------------------------------------------------------------------------------------------------------------------------------------------------------------------------------------------------------------------------------------------------------------------------------------------------------------------------------------------------------------------------------|--|--|--------------------------------------------------------------------------------------------------------------------------------------------------------------------------------------------------------------------------------------------------------------------------------------------------------------------------------|--|
|    |     |  | <p>nonsignificant difference</p> <p>Patient assessment of chronic illness care (PACIC) score out of 100</p> <p>Statistically significant difference ATSM +12.2 V's control GVC +12.6 V's control Data present</p> <p>Diabetes Quality Improvement Program (100 score)</p> <p>Self management behavior statistically significant difference ATSM +0.6 V's control GVC +0.3 V's control Data present</p> <p>Diabetes self efficacy statistically significant difference ATSM +6.0 V's control GVC +5.5 V's control Data present</p> |  |  | <p>Bed days: ATSM significant reduction</p> <p>Restricted activity, ATSM significant improvement</p> <p><b><u>Interpersonal Processes of Care</u></b> for Diverse Populations (IPC) instrument to capture reports of provider's communication. Statistically significant difference ATSM +9.0 V's control</p>                  |  |
| 37 | Sen |  |                                                                                                                                                                                                                                                                                                                                                                                                                                                                                                                                   |  |  | <p>Primary outcome was adherence to biometric tests:</p> <p>At three months; total adherence rates were 81% in the low incentive arm V's 58% in control (p 0.007) and 77% in high incentive arm V's 58% (p0.02).</p> <p>No difference between the incentive arms.</p> <p>But no difference in the high incentive group V's</p> |  |

1  
2  
3  
4  
5  
6  
7  
8  
9  
10  
11  
12  
13  
14  
15  
16  
17  
18  
19  
20  
21  
22  
23  
24  
25  
26  
27  
28  
29  
30  
31  
32  
33  
34  
35  
36  
37  
38  
39  
40  
41  
42  
43  
44  
45  
46  
47  
48  
49

1  
2  
3  
4  
5  
6  
7  
8  
9  
10  
11  
12  
13  
14  
15  
16  
17  
18  
19  
20  
21  
22  
23  
24  
25  
26  
27  
28  
29  
30  
31  
32  
33  
34  
35  
36  
37  
38  
39  
40  
41  
42  
43  
44  
45  
46  
47  
48  
49

|    |          |                                                                                                                                                               |                                                                                                                                                                                                                                   |  |                                                   |                                                                                                                                                                                               |                                                                                                                                                                                                                      |
|----|----------|---------------------------------------------------------------------------------------------------------------------------------------------------------------|-----------------------------------------------------------------------------------------------------------------------------------------------------------------------------------------------------------------------------------|--|---------------------------------------------------|-----------------------------------------------------------------------------------------------------------------------------------------------------------------------------------------------|----------------------------------------------------------------------------------------------------------------------------------------------------------------------------------------------------------------------|
|    |          |                                                                                                                                                               |                                                                                                                                                                                                                                   |  |                                                   | control at month 6 (at 3 month post intervention follow up)..<br><br>But the low incentive group still had significant improvement in adherence at month 6 Vs control (62% V's 27%, p 0.002). |                                                                                                                                                                                                                      |
| 38 | Sugiyama | Change Mental Component Summary Score (MCS-12) from the SF-12: A mean difference of +1.6 between intervention and control which was statistically significant | Secondary outcomes: Social support score from the Diabetes Care Profile: non-significant change                                                                                                                                   |  |                                                   |                                                                                                                                                                                               |                                                                                                                                                                                                                      |
| 39 | Tang     |                                                                                                                                                               | Satisfaction/ Psychosocial wellbeing<br><br>Intervention group had higher treatment satisfaction (statistically significant) and lower treatment distress scores. Other scales of diabetes distress had no change between groups. |  | BMI nonsignificant difference                     | Healthcare utilisation - nonsignificant difference in total physician visits.                                                                                                                 | Significant increase in new medications started and insulin commencement in intervention group. Patients already on insulin- the intervention group had a statistically significant higher number of dose increases. |
| 40 | Taylor   |                                                                                                                                                               | Psychosocial (SF 26 for QoL and Duke Activity Status):<br><br>Nonsignificant difference in psychological variables Patient and physician satisfaction nonsignificant difference                                                   |  |                                                   | Medical utilization (physician visits) nonsignificant difference in physician or ED visits                                                                                                    |                                                                                                                                                                                                                      |
| 41 | Thom     |                                                                                                                                                               |                                                                                                                                                                                                                                   |  | 10-year framingham risk nonsignificant difference |                                                                                                                                                                                               |                                                                                                                                                                                                                      |

|    |      |                                                                                                                                     |                                                                                                                                                                                                                                                             |                      |                                                                                                                                                                            |                                                                                             |                                                                                                                                                                                           |
|----|------|-------------------------------------------------------------------------------------------------------------------------------------|-------------------------------------------------------------------------------------------------------------------------------------------------------------------------------------------------------------------------------------------------------------|----------------------|----------------------------------------------------------------------------------------------------------------------------------------------------------------------------|---------------------------------------------------------------------------------------------|-------------------------------------------------------------------------------------------------------------------------------------------------------------------------------------------|
| 42 | Wild | <p>EQ-5D index:<br/>Adjusted MD was 0.00 (non-significant)</p> <p>Total HADS score:<br/>Adjusted MD was -0.31 (non-significant)</p> | <p>Self-efficacy: Adjusted MD was +0.69 (non-significant)</p> <p>Self-reported total physical activity score (IPAQ): Adjusted MD was -467.31 (non-significant)</p> <p>Diabetes Knowledge (first 14 items only): Adjusted MD was +0.04 (non-significant)</p> | Medication adherence | <p>Weight: adjusted MD supporting telemonitoring group - 0.35 (p = 0.6)</p> <p>No significant differences in alcohol use, smoking, or urinary sodium/creatinine ratio.</p> | <p>Greater number of telephone calls in intervention group (rate ratio 7.5 p&lt;0.0001)</p> | <p>No significant change in use of insulin or other medications (from Supplementary File 1).</p> <p>No change in forgetfulness taking medications or carelessness taking medications.</p> |
|----|------|-------------------------------------------------------------------------------------------------------------------------------------|-------------------------------------------------------------------------------------------------------------------------------------------------------------------------------------------------------------------------------------------------------------|----------------------|----------------------------------------------------------------------------------------------------------------------------------------------------------------------------|---------------------------------------------------------------------------------------------|-------------------------------------------------------------------------------------------------------------------------------------------------------------------------------------------|

peer review only

1  
2  
3  
4  
5  
6  
7  
8  
9  
10  
11  
12  
13  
14  
15  
16  
17  
18  
19  
20  
21  
22  
23  
24  
25  
26  
27  
28  
29  
30  
31  
32  
33  
34  
35  
36  
37  
38  
39  
40  
41  
42  
43  
44  
45  
46  
47  
48  
49



# PRISMA 2009 Checklist

1  
2  
3  
4  
5  
6  
7  
8  
9  
10  
11  
12  
13  
14  
15  
16  
17  
18  
19  
20  
21  
22  
23  
24  
25  
26  
27  
28  
29  
30  
31  
32  
33  
34  
35  
36  
37  
38  
39  
40  
41  
42  
43  
44  
45  
46  
47  
48  
49

| Section/topic                      | #  | Checklist item                                                                                                                                                                                                                                                                                              | Reported on page # |
|------------------------------------|----|-------------------------------------------------------------------------------------------------------------------------------------------------------------------------------------------------------------------------------------------------------------------------------------------------------------|--------------------|
| <b>TITLE</b>                       |    |                                                                                                                                                                                                                                                                                                             |                    |
| Title                              | 1  | Identify the report as a systematic review, meta-analysis, or both.                                                                                                                                                                                                                                         | 1                  |
| <b>ABSTRACT</b>                    |    |                                                                                                                                                                                                                                                                                                             |                    |
| Structured summary                 | 2  | Provide a structured summary including, as applicable: background; objectives; data sources; study eligibility criteria, participants, and interventions; study appraisal and synthesis methods; results; limitations; conclusions and implications of key findings; systematic review registration number. | 3                  |
| <b>INTRODUCTION</b>                |    |                                                                                                                                                                                                                                                                                                             |                    |
| Rationale                          | 3  | Describe the rationale for the review in the context of what is already known.                                                                                                                                                                                                                              | 6                  |
| Objectives                         | 4  | Provide an explicit statement of questions being addressed with reference to participants, interventions, comparisons, outcomes, and study design (PICOS).                                                                                                                                                  | 7                  |
| <b>METHODS</b>                     |    |                                                                                                                                                                                                                                                                                                             |                    |
| Protocol and registration          | 5  | Indicate if a review protocol exists, if and where it can be accessed (e.g., Web address), and, if available, provide registration information including registration number.                                                                                                                               | 8                  |
| Eligibility criteria               | 6  | Specify study characteristics (e.g., PICOS, length of follow-up) and report characteristics (e.g., years considered, language, publication status) used as criteria for eligibility, giving rationale.                                                                                                      | 8, 9               |
| Information sources                | 7  | Describe all information sources (e.g., databases with dates of coverage, contact with study authors to identify additional studies) in the search and date last searched.                                                                                                                                  | 8                  |
| Search                             | 8  | Present full electronic search strategy for at least one database, including any limits used, such that it could be repeated.                                                                                                                                                                               | 8                  |
| Study selection                    | 9  | State the process for selecting studies (i.e., screening, eligibility, included in systematic review, and, if applicable, included in the meta-analysis).                                                                                                                                                   | 8                  |
| Data collection process            | 10 | Describe method of data extraction from reports (e.g., piloted forms, independently, in duplicate) and any processes for obtaining and confirming data from investigators.                                                                                                                                  | 9, 10              |
| Data items                         | 11 | List and define all variables for which data were sought (e.g., PICOS, funding sources) and any assumptions and simplifications made.                                                                                                                                                                       | 9, 10              |
| Risk of bias in individual studies | 12 | Describe methods used for assessing risk of bias of individual studies (including specification of whether this was done at the study or outcome level), and how this information is to be used in any data synthesis.                                                                                      | 10                 |
| Summary measures                   | 13 | State the principal summary measures (e.g., risk ratio, difference in means).                                                                                                                                                                                                                               | 10, 11             |
| Synthesis of results               | 14 | Describe the methods of handling data and combining results of studies, if done, including measures of consistency (e.g., $I^2$ for each meta-analysis).                                                                                                                                                    | 10, 11             |



# PRISMA 2009 Checklist

Page 1 of 2

| Section/topic                 | #  | Checklist item                                                                                                                                                                                           | Reported on page # |
|-------------------------------|----|----------------------------------------------------------------------------------------------------------------------------------------------------------------------------------------------------------|--------------------|
| Risk of bias across studies   | 15 | Specify any assessment of risk of bias that may affect the cumulative evidence (e.g., publication bias, selective reporting within studies).                                                             | 10                 |
| Additional analyses           | 16 | Describe methods of additional analyses (e.g., sensitivity or subgroup analyses, meta-regression), if done, indicating which were pre-specified.                                                         | 10, 11             |
| <b>RESULTS</b>                |    |                                                                                                                                                                                                          |                    |
| Study selection               | 17 | Give numbers of studies screened, assessed for eligibility, and included in the review, with reasons for exclusions at each stage, ideally with a flow diagram.                                          | 12                 |
| Study characteristics         | 18 | For each study, present characteristics for which data were extracted (e.g., study size, PICOS, follow-up period) and provide the citations.                                                             | 12, 13             |
| Risk of bias within studies   | 19 | Present data on risk of bias of each study and, if available, any outcome level assessment (see item 12).                                                                                                | 13                 |
| Results of individual studies | 20 | For all outcomes considered (benefits or harms), present, for each study: (a) simple summary data for each intervention group (b) effect estimates and confidence intervals, ideally with a forest plot. | 13, 14, 15         |
| Synthesis of results          | 21 | Present results of each meta-analysis done, including confidence intervals and measures of consistency.                                                                                                  | 13, 14, 15         |
| Risk of bias across studies   | 22 | Present results of any assessment of risk of bias across studies (see Item 15).                                                                                                                          | 13                 |
| Additional analysis           | 23 | Give results of additional analyses, if done (e.g., sensitivity or subgroup analyses, meta-regression [see Item 16]).                                                                                    | 15                 |
| <b>DISCUSSION</b>             |    |                                                                                                                                                                                                          |                    |
| Summary of evidence           | 24 | Summarize the main findings including the strength of evidence for each main outcome; consider their relevance to key groups (e.g., healthcare providers, users, and policy makers).                     | 16                 |
| Limitations                   | 25 | Discuss limitations at study and outcome level (e.g., risk of bias), and at review-level (e.g., incomplete retrieval of identified research, reporting bias).                                            | 16, 17             |
| Conclusions                   | 26 | Provide a general interpretation of the results in the context of other evidence, and implications for future research.                                                                                  | 19                 |
| <b>FUNDING</b>                |    |                                                                                                                                                                                                          |                    |
| Funding                       | 27 | Describe sources of funding for the systematic review and other support (e.g., supply of data); role of funders for the systematic review.                                                               | 4                  |

From: Moher D, Liberati A, Tetzlaff J, Altman DG, The PRISMA Group (2009). Preferred Reporting Items for Systematic Reviews and Meta-Analyses: The PRISMA Statement. PLoS Med 6(6): e1000097. doi:10.1371/journal.pmed1000097

For more information, visit: [www.prisma-statement.org](http://www.prisma-statement.org).

For peer review only - <http://bmjopen.bmj.com/site/about/guidelines.xhtml>

Page 2 of 2

# BMJ Open

## Improving risk factor management for patients with poorly controlled type 2 diabetes: A systematic review of healthcare interventions in primary care and community settings

|                                 |                                                                                                                                                                                                                                                                                                                                                                                                                                                                                                                              |
|---------------------------------|------------------------------------------------------------------------------------------------------------------------------------------------------------------------------------------------------------------------------------------------------------------------------------------------------------------------------------------------------------------------------------------------------------------------------------------------------------------------------------------------------------------------------|
| Journal:                        | <i>BMJ Open</i>                                                                                                                                                                                                                                                                                                                                                                                                                                                                                                              |
| Manuscript ID                   | bmjopen-2016-015135.R2                                                                                                                                                                                                                                                                                                                                                                                                                                                                                                       |
| Article Type:                   | Research                                                                                                                                                                                                                                                                                                                                                                                                                                                                                                                     |
| Date Submitted by the Author:   | 18-May-2017                                                                                                                                                                                                                                                                                                                                                                                                                                                                                                                  |
| Complete List of Authors:       | Murphy, Mark; HRB Centre for Primary Care Research, Department of General Practice<br>Byrne, Molly; University of Galway, Ireland, School of Psychology<br>Galvin, Rose; University of Limerick, Department of Clinical Therapies<br>Boland, Fiona; Royal College of Surgeons Ireland, 123 St Stephens Green, HRB Centre For Primary Care Research, Division of Population Health Sciences (PHS)<br>Fahey, Tom; Royal College of Surgeons in Ireland, Department of General Practice<br>Smith, Susan; RCSI, General Practice |
| <b>Primary Subject Heading</b>: | Diabetes and endocrinology                                                                                                                                                                                                                                                                                                                                                                                                                                                                                                   |
| Secondary Subject Heading:      | General practice / Family practice, Epidemiology, Health services research                                                                                                                                                                                                                                                                                                                                                                                                                                                   |
| Keywords:                       | DIABETES & ENDOCRINOLOGY, Organisation of health services < HEALTH SERVICES ADMINISTRATION & MANAGEMENT, PRIMARY CARE                                                                                                                                                                                                                                                                                                                                                                                                        |
|                                 |                                                                                                                                                                                                                                                                                                                                                                                                                                                                                                                              |

SCHOLARONE™  
Manuscripts

**Title**

Improving risk factor management for patients with poorly controlled type 2 diabetes: A systematic review of healthcare interventions in primary care and community settings

**Corresponding author**

Dr. Mark E Murphy, MB BCh BAO BMedSci MRCP MICGP

HRB Centre for Primary Care Research,

Department of General Practice,

Royal College of Surgeons, Ireland,

Dublin 2,

Ireland.

Telephone: 01 4028504

Email: [markmurphy@rcsi.ie](mailto:markmurphy@rcsi.ie)

**Co-authors**

Dr. Molly Byrne, BA MSc PhD <sup>2</sup>

Dr. Rose Galvin, PhD BScPhysio DipStats MISC <sup>3</sup>

Dr. Fiona Boland, MSc PhD <sup>1</sup>

Professor Tom Fahey, MSc MD DCH DObs MEd Cert MFPH FRCGP <sup>1</sup>

Professor Susan M Smith, MD MSc MB BCh BAO DCH MRCPI MRCGP <sup>1</sup>



**Co-authors institutions**

1/ HRB Centre for Primary Care Research, Royal College of Surgeons, Ireland

2/ Department of Physiotherapy, University of Limerick, Ireland

3/ Health Behaviour Change Research Group, School of Psychology, National University of Ireland, Galway, Ireland.

**Word Count: 3976**

For peer review only

**Abstract**

Objectives: Poorly-controlled type 2 diabetes mellitus (T2DM) is a major international health problem. Our aim was to assess the effectiveness of healthcare interventions, specifically targeting patients with poorly-controlled T2DM, which seek to improve glycaemic control and cardiovascular risk in primary care settings.

Design: Systematic review.

Setting: Primary care and community settings.

Included studies: Randomised controlled trials (RCTs) targeting patients with poor glycaemic control were identified from Pubmed, Embase, Web of Science, Cochrane Library and SCOPUS. Poor glycaemic control was defined as HbA1c over 59 mmol/mol (7.5%).

Interventions: Interventions were classified as organisational, patient-oriented, professional, financial or regulatory.

Outcomes: Primary outcomes were HbA1c, blood pressure and lipid control. Two reviewers independently assessed studies for eligibility, extracted data, and assessed study quality. Meta-analyses were undertaken where appropriate using random-effects models. Subgroup analysis explored the effects of intervention type, baseline HbA1c, study quality and study duration. Meta-regression analyses were undertaken to investigate identified heterogeneity.

Results: Forty-two RCTs were identified, including 11,250 patients with most undertaken in the USA. In general studies had low risk of bias. The main intervention-types were patient-directed (48%) and organisational (48%). Overall, interventions reduced HbA1c by -0.34% (95% CI; -0.46%, -0.22%), but meta-analyses had high statistical heterogeneity. Subgroup analyses suggested that organisational interventions and interventions on those with baseline HbA1c over 9.5% had better improvements in HbA1c. Meta-regression analyses suggested that only interventions on those with population HbA1c over 9.5% were more effective. Interventions had a modest improvement of blood pressure and lipids, although baseline levels of

control were generally good.

Conclusions: This review suggests that interventions for T2DM, in primary care, are better targeted at individuals with very poor glycaemic control and that organisational interventions may be more effective.

#### Article summary:

##### 'Strengths and limitations of the study'

- This systematic review adds to the evidence regarding the effectiveness of healthcare interventions, which specifically target patients with poor glycaemic control of Type 2 Diabetes Mellitus, in community settings.
- There is no specific definition for 'poor control' diabetes in the literature, but by including all studies that had patients with a HbA1c  $\geq$  59 mmol/mol (7.5%), we captured the full range of poor glycaemic control and also examined other key risk factors such as blood pressure and lipids.
- Data were pooled from 42 studies across four continents, enhancing the generalisability of the findings.
- We did not account for medication use in the studies, but given that all included studies were RCTs, which would balance out delivery of medications, we think that differences in underlying medication usage may relate to how different interventions promote intensification of medications.
- An individual patient data meta-analysis may answer further questions not possible in this review.

#### Funding statement:

This work was supported by the HRB Centre for Primary Care Research (Research Grant: HRC-2014-1), a publicly funded body. Four of the six study authors are employed by this agency.

#### Competing interests statement:

1  
2  
3 Nil  
4  
5  
6  
7

8 **Author's contributions:**  
9

10 All authors contributed to the drafting of the paper. MEM, MB and RG  
11 independently assessed studies for eligibility, extracted data, and assessed study  
12 quality. Decisions or disagreements were brought to SMS. SMS, TF and FB provided  
13 methodological and statistical support to the paper. All authors contributed to the  
14 writing of the paper.  
15  
16  
17  
18  
19  
20  
21  
22  
23  
24  
25  
26  
27  
28  
29  
30  
31  
32  
33  
34  
35  
36  
37  
38  
39  
40  
41  
42  
43  
44  
45  
46  
47  
48  
49  
50  
51  
52  
53  
54  
55  
56  
57  
58  
59  
60

## Main text

### Introduction

Worldwide, type 2 diabetes mellitus (T2DM) is rising in prevalence and will exceed 4.4% of the world's population, or 366 million by 2030 (1). Despite a wealth of evidence regarding the importance of risk factor control in T2DM, many patients continue to have poor control of HbA1c, blood pressure and lipids. Up to 60% of patients fail to meet target HbA1c levels (2). Similarly over one third of patients with T2DM have inadequate blood pressure control (3). Poorly-controlled T2DM - and its associated microvascular and macrovascular complications - is associated with higher morbidity, higher mortality, poorer quality of life and substantial economic burden (4).

Several studies have examined interventions designed to support the delivery of diabetes care in the community to improve glycaemic and cardiovascular risk factor control (5-11). A 2011 review of community-based interventions including all patients with T2DM, comprising sixty-eight studies, showed that only one third had a statistically significant improvement in one of the relevant clinical outcomes for diabetes: HbA1c, blood pressure or lipids (8). The majority of included studies targeted all patients with T2DM without focussing on those with poor control. Although no overall effect was noted, combining organisational with professional (multifaceted) interventions was concluded to be more beneficial than single interventions and the highest quality multifaceted randomised controlled trials (RCTs) tended to include decision support interventions and elements. A 2013 review looked at 48 cluster RCTs, assessing the effectiveness of Quality Improvement (QI) strategies on the management of diabetes (both type 1 and 2) (11). It suggested that QI interventions, which intervened at a system level on diabetes management, were associated with the largest benefits in glycaemic control and that the effectiveness of interventions targeting healthcare practitioners varied with baseline glycaemic control; being more effective with patients with worse control (11). A 2016 review, of type 1 or type 2 diabetes in primary care, looked at the effects of Clinician Education, Clinician Reminders, Team Changes, Case Management,

1  
2  
3 Electronic Patient Registry, Telemedicine and Audit and Feedback (10). Including  
4 thirty studies, it concluded that multifaceted interventions on multidisciplinary  
5 teams were most effective. Interventions targeting family physicians were only  
6 effective if computerised feedback on insulin prescribing was provided.  
7  
8  
9

10  
11  
12 Four large RCTs from North America and the UK have investigated the effects of  
13 intensive management of hyperglycaemic and cardiac risk factors on mortality in  
14 T2DM across all settings (12-17). Uncertainty remains regarding intensive glycaemic  
15 management for all patients with T2DM, with concerns about aggressive reductions  
16 in HbA1c (18). Targeted reductions in cardiovascular and glycaemic risk factors in  
17 certain vulnerable populations (cognitively impaired, disabled and frail) have been  
18 advocated (19). Interventions that specifically target those with very poor control of  
19 risk factors may be more beneficial than those targeting all patients, achieving the  
20 benefits of cardiovascular and glycaemic control, but without the potential risks of  
21 intensively lowering HbA1c in all persons with T2DM. The effect of interventions  
22 specifically targeting patients with poorly controlled T2DM in primary care is  
23 unknown.  
24  
25  
26  
27  
28  
29  
30  
31  
32  
33  
34

35 Our aim was to assess the effectiveness of healthcare interventions delivered in  
36 primary care and community settings, targeting poorly-controlled T2DM, which seek  
37 to improve glycaemic control, blood pressure and lipids.  
38  
39  
40  
41  
42  
43  
44  
45  
46  
47  
48  
49  
50  
51  
52  
53  
54  
55  
56  
57  
58  
59  
60

## Methods

The Preferred Reporting Items for Systematic Reviews and Meta-Analyses (PRISMA) guidelines were used to standardise the conduct and reporting of the research and the protocol was registered on PROSPERO (20).

### *Data Sources and Searches*

We searched articles in all languages from the Cochrane Library, Pubmed, Embase, Web of Science and SCOPUS from 1990 to 31st December 2016. Reference lists of all included papers were searched. Secondary searching of all references from included studies was also conducted. *Appendix 1* outlines the search string.

### *Study Selection*

We considered RCTs, controlled clinical trials (CCTs), controlled before and after studies (CBAs) and interrupted time series analyses (ITS) meeting the Cochrane Effective Practice and Organisation of Care (EPOC) quality criteria (21). Studies published in all languages were eligible.

### Population:

Individuals with 'poorly controlled' T2DM were our population of interest. Though there is a broad consensus about the importance of achieving good glycaemic control for the reasons described, there are no validated cut-offs, which define 'poor-control' of T2DM for targeted interventions. Poorly controlled T2DM has been defined based upon elevated glycated haemoglobin levels in the literature, with different thresholds of HbA1c described, from over 59 mmol/mol (7.5%), over 64 mmol/mol (8.0%) to over 75 mmol/mol (9.0%) (22-24). In this review, we considered participants to have poorly controlled T2DM if their HbA1c was over 59 mmol/mol (7.5%) (or if over 80% of the population in a study had a HbA1c over 59 mmol/mol). Similarly there is no defined cut off as to what defines 'poorly-controlled' blood pressure. We identified studies primarily based on poor glycaemic control but also included participants in these studies who had uncontrolled hypertension or elevated cholesterol/ lipids, if the risk factor level was above that of an accepted

1  
2  
3 international target, as designated by the study authors. Where studies included  
4 patients with 'poor control' based upon a range of risk factor profiles, for  
5 consistency, we only included a study if 80% of the population had a HbA1c over 59  
6 mmol/mol (7.5%).  
7  
8  
9

#### 10 11 Interventions:

12  
13 We included interventions delivered by healthcare professionals (HCPs) specifically  
14 aiming to target patients with poor control of T2DM, based in primary care or  
15 community settings. The primary healthcare setting was defined as providing  
16 "integrated, easy to access, health care services by clinicians who are accountable  
17 for addressing a large majority of personal health care needs, developing a sustained  
18 and continuous relationship with patients, and practicing in the context of family and  
19 community" (25). We excluded drug trials though interventions could have involved  
20 treatment intensification. Interventions were defined as simple if they had one  
21 identifiable component and multifaceted if they had more than one element. We  
22 excluded trials performed within the hospital or the hospital-outpatient setting. The  
23 Cochrane EPOC taxonomy of interventions was utilised and the predominant  
24 intervention type was defined using five categories including organisational, patient-  
25 centred, regulatory, financial and professional. Examples of these intervention types  
26 are provided in *Appendix 2* (21):  
27  
28  
29  
30  
31  
32  
33  
34  
35  
36  
37  
38

#### 39 Comparison:

40 Comparison groups were included if they received usual care in that setting for  
41 T2DM. Controls were also included if they received minor enhanced elements of  
42 care, such as education leaflets, which the study authors believed did not go beyond  
43 usual care in most settings.  
44  
45  
46  
47  
48

#### 49 Outcome measures:

50 Primary outcomes included glycaemic control (HbA1c), blood pressure (systolic or  
51 diastolic) and lipid levels, but if studies did not include HbA1c they were excluded.  
52 Secondary outcomes included patient reported outcome measures (PROMs) (for  
53 example health related quality of life), utilisation of health services, behavioural  
54  
55  
56  
57  
58  
59  
60



1  
2  
3 outcomes such as medication adherence, provider behaviour, acceptability of service  
4 to patients and providers, economic outcomes and adverse events.  
5  
6

#### 7 *Data Extraction and Quality Assessment*

8  
9  
10 Two reviewers (MEM and RG) read the titles and/ or abstracts of the identified  
11 references and eliminated irrelevant studies. Studies that were deemed eligible for  
12 inclusion were read in full and their suitability for inclusion in the systematic review  
13 was independently determined by two reviewers. Disagreements were managed by  
14 a third, independent reviewer (SMS). The following information was extracted: a)  
15 Details of intervention, b) Participants, c) Clinical setting, d) Study design, e)  
16 Outcomes, f) Author Information. We contacted authors for missing data.  
17  
18  
19  
20  
21  
22

23 Risk of bias in articles was assessed using the Cochrane Handbook for systematic  
24 reviewing and EPOC criteria (26). Two review authors independently assessed the  
25 risk of bias of each included study against the criteria described in the Cochrane risk  
26 of bias tool. We explicitly judged each of these criteria using: low risk of bias, high  
27 risk of bias or unclear risk of bias (either lack of information or uncertainty over the  
28 potential for bias). We resolved disagreements by consensus and consulted a third  
29 review author to resolve disagreements if necessary. An overall assessment of a  
30 study's risk of bias was determined using EPOC guidance, with judgement and  
31 consensus reached between two reviewers (MEM and SMS) (26).  
32  
33  
34  
35  
36  
37  
38  
39

#### 40 *Data Analysis*

41  
42  
43 For continuous data we calculated the treatment effect using mean differences (MD)  
44 and 95% confidence intervals (CI). No binary outcomes were included. Revman  
45 software was used to perform the analysis, determine heterogeneity and produce  
46 forest plots to illustrate pooled estimates (21). Stata version 13 was used to  
47 investigate publication bias by creating funnel plots and using Egger's test to assess  
48 funnel plot asymmetry (27). A random-effects analysis was performed and  
49 heterogeneity across the studies was quantified using the  $I^2$  statistic. The  $I^2$  statistic  
50 describes the percentage of the variability in effect estimates which is due to  
51 heterogeneity rather than sampling error (chance) (28). If the  $I^2$  statistic was >50%, it  
52  
53  
54  
55  
56  
57  
58  
59  
60

1  
2  
3 was deemed that there was significant heterogeneity between the studies.  
4

5  
6 Subgroup analyses were performed for primary outcomes based on a priori  
7 assumptions, as per the PROSPERO protocol (20). For HbA1c we explored the  
8 possible effects of subgroups; a) the type of intervention based upon the EPOC  
9 taxonomy (*Appendix 2*); b) study quality and c) baseline HbA1c in the study  
10 populations (HbA1c 7.5% - 9.4%, or  $\geq 9.5\%$ ). After reviewing the included studies we  
11 also included study duration as a subgroup ( $< 12$  months or  $\geq 12$  months), as a wide  
12 range in study duration was found. Subgroup analyses for systolic blood pressure  
13 (SBP) and diastolic blood pressure (DBP) explored the effects of intervention-type  
14 based upon the EPOC taxonomy.  
15  
16  
17  
18  
19  
20  
21

22  
23 When important heterogeneity was identified, we investigated its causes using  
24 meta-regression. Meta-regression is an extension to subgroup analysis that allows  
25 the effect of continuous, as well as categorical, characteristics to be investigated  
26 (29). Meta-regression was performed to explore the effects of; a) study quality  
27 (using the overall assessment risk of bias); b) study population characteristics (e.g.  
28 gender, age and baseline HbA1c and SBP); c) intervention type (EPOC taxonomy);  
29 and d) study duration on the primary outcomes (29). Random effects meta-  
30 regression was performed using Stata 13 (27).  
31  
32  
33  
34  
35  
36  
37  
38  
39  
40  
41  
42  
43  
44  
45  
46  
47  
48  
49  
50  
51  
52  
53  
54  
55  
56  
57  
58  
59  
60

## Results

Overall 18,829 titles were screened and 42 full text articles met the inclusion criteria (Figure 1: PRISMA Flow diagram). All 42 studies were RCTs, encompassing 50 interventions in total, comprising 11,250 patients (22-24, 30-68). No other eligible study designs were identified.

### *Characteristics of studies*

Twenty-nine of the 42 studies were conducted in the United States, nine in Europe, two in Australia, one in Mexico and one in Israel. Follow-up of outcomes in the studies varied in length from 3 (53) to 36 months (46). The mean HbA1c at baseline across all studies was 9.5% (95% CI; 9.3%, 9.8%). The mean age of patients in the studies was 58.0, varying from 47.9 (62) to 67.5 (41) partly reflecting different inclusion criteria (Table 1). Thirty studies explicitly defined their study population as “poorly controlled”, “complicated” or “persistently poorly controlled”, whereas the other twelve had poorly controlled T2DM with HbA1c  $\geq$  59 mmol/mol (7.5%) as per the review inclusion criteria. Twenty-seven of the 42 studies reported SBP results (22-24, 30-36, 38, 39, 41, 45, 46, 48-51, 54, 58-60, 62, 65, 66, 68) and of these, twenty-three reported DBP (22-24, 31, 32, 34-36, 38, 39, 41, 45, 46, 48, 49, 51, 54, 58, 59, 62, 65, 66, 68). Twenty of the studies reported a lipid outcome (23, 24, 30-32, 35, 36, 38, 39, 41, 45, 46, 48, 51, 56, 58, 62, 65, 66, 68). All of the 42 studies reported at least one secondary outcome. Two studies were excluded from primary outcome analysis due to lack of appropriate data, despite efforts to contact authors (31, 61).

1  
2  
3  
4  
5  
6  
7  
8  
9  
10  
11  
12  
13  
14  
15  
16  
17  
18  
19  
20  
21  
22  
23  
24  
25  
26  
27  
28  
29  
30  
31  
32  
33  
34  
35  
36  
37  
38  
39  
40  
41  
42  
43  
44  
45  
46  
47  
48  
49

**Table 1: Characteristics of included studies**

| Study ID<br>Author,<br>Year<br>Country   | Patient participants<br>Total patients (n) Intervention (n) Control (n)<br>Age (mean, unless stated)<br>Gender (% male, unless stated)<br>HbA1c cutoff of 'poor control'<br>Baseline HbA1c level (mean)<br>Baseline BP (mean)<br>% on insulin at baseline<br>Diabetes duration: (years)<br><b>Practitioner and practice participants</b>                                                                                                  | Brief Intervention description                                                                                                                                                                                                                                                                                                            | Predominant Intervention type | Outcomes:<br>Primary<br>Secondary                                                                                                                                                                                                                                         | Study duration<br>Months |
|------------------------------------------|-------------------------------------------------------------------------------------------------------------------------------------------------------------------------------------------------------------------------------------------------------------------------------------------------------------------------------------------------------------------------------------------------------------------------------------------|-------------------------------------------------------------------------------------------------------------------------------------------------------------------------------------------------------------------------------------------------------------------------------------------------------------------------------------------|-------------------------------|---------------------------------------------------------------------------------------------------------------------------------------------------------------------------------------------------------------------------------------------------------------------------|--------------------------|
| Anzaldo-Campos<br><br>2016<br><br>Mexico | <b>Patient participants</b><br>301 Patients (99 Intervention 1 (PD) and 102 in Intervention 2 (PD-TE) and 100 Control)<br>Mean age: 51.5<br>% male: 33%<br>T2DM with HbA1c ≥ 8.0%<br>Mean HbA1c: 11.16<br>Mean BP: 122/ 78<br>% insulin baseline: NR<br>Mean diabetes duration: NR<br><b>Practitioner and practice participants</b><br>81 medical offices within one Family Medical Unit<br>Trained clinicians, nurses and peer educators | Two interventions:<br><br>Nurse care support and peer-led diabetes self-management education intervention (called Project Dulce).<br><br>Nurse care support and peer-led diabetes self-management education intervention. A technology-enhanced intervention, using cell phone uploads of glucose and BP levels and text message support. | Patient-centred               | Primary outcomes:<br>HbA1c at 10 months<br><br>Secondary outcomes:<br>Lipid and TAG profile, BP, BMI.<br>Self-reported outcomes: Self efficacy (Spanish Self-Efficacy), depression (PHQ-9), lifestyle (IMEVID), quality of life (Diabetes 39), diabetes knowledge (DKQ24) | 10 months                |

|                                              |                                                                                                                                                                                                                                                                                                                                                                     |                                                                                 |                 |                                                                                                                                                                                                                                                                                                                                                     |           |
|----------------------------------------------|---------------------------------------------------------------------------------------------------------------------------------------------------------------------------------------------------------------------------------------------------------------------------------------------------------------------------------------------------------------------|---------------------------------------------------------------------------------|-----------------|-----------------------------------------------------------------------------------------------------------------------------------------------------------------------------------------------------------------------------------------------------------------------------------------------------------------------------------------------------|-----------|
|                                              |                                                                                                                                                                                                                                                                                                                                                                     |                                                                                 |                 |                                                                                                                                                                                                                                                                                                                                                     |           |
| Basudev<br>2016<br>UK                        | <p><b>Patient participants</b><br/>235 Patients (93 Intervention and 115 Control)<br/>Mean age: 59.9<br/>% male: 57.4%<br/>T2DM with HbA1c &gt; 8.5%<br/>Mean HbA1c: 10.3<br/>Mean BP: 135/ 78<br/>% insulin baseline: 38%<br/>Mean diabetes duration: NR</p> <p><b>Practitioner and practice participants</b><br/>From six general practices in London</p>         | Virtual clinic integrating primary and specialist care.                         | Organisational  | <p>Primary outcomes:<br/>HbA1c at 12 months</p> <p>Secondary outcomes: BP; BMI; Lipids; Renal Function (eGFR).</p>                                                                                                                                                                                                                                  | 12 months |
| Blackberry<br>2013<br>Victoria,<br>Australia | <p><b>Patient participants</b><br/>473 Patients (236 Intervention and 237 Control)<br/>Mean age: 62.8<br/>% male: 57%<br/>T2DM with HbA1c &gt; 7.5%<br/>Mean HbA1c: 8.06<br/>Mean BP: NR<br/>% insulin baseline: 27%<br/>Mean diabetes duration 10 (5-14 range)</p> <p><b>Practitioner and practice participants</b><br/>59 practices<br/>Practice-based nurses</p> | Telephone coaching by nurses to support diabetes management and self monitoring | Patient-centred | <p>Primary outcomes:<br/>HbA1c at 18 months</p> <p>Secondary outcomes: Lipid and TAG profile; eGFR and urine ACR; BP; BMI; waist circumference; smoking status; Quality of Life; Diabetes Self efficacy; Diabetes support; Depression status; Intensification of diabetes.<br/>Others: Health service utilization; Physical activity, Nutrition</p> | 18 months |
| Capozza<br>2015<br>USA                       | <p><b>Patient participants</b><br/>93 patients (58 Intervention; 35 Control)<br/>Mean age: 58.7<br/>% male: 35.5%<br/>T2DM with HbA1c &gt; 8%<br/>Mean Baseline HbA1c 9.1%<br/>Mean Baseline BP: NR<br/>% insulin baseline: NR<br/>Diabetes duration: NR</p> <p><b>Practitioner and practice participants</b><br/>Recruited from 18 primary clinics</p>             | Text-message based behavioural intervention for T2DM                            | Patient-centred | <p>Primary outcome:<br/>Change in HbA1c from day 0 to day 180</p> <p>Secondary outcomes:<br/>Patient interaction and satisfaction (CSQ8) with the program</p>                                                                                                                                                                                       | 6 months  |

|                                            |                                                                                                                                                                                                                                                                                                                                                                                                                                                                                                     |                                                                                                                                            |                  |                                                                                                                                                                                                                                                                                                     |                                                                                                     |
|--------------------------------------------|-----------------------------------------------------------------------------------------------------------------------------------------------------------------------------------------------------------------------------------------------------------------------------------------------------------------------------------------------------------------------------------------------------------------------------------------------------------------------------------------------------|--------------------------------------------------------------------------------------------------------------------------------------------|------------------|-----------------------------------------------------------------------------------------------------------------------------------------------------------------------------------------------------------------------------------------------------------------------------------------------------|-----------------------------------------------------------------------------------------------------|
| Choe<br>2005<br>USA                        | <p><b>Patient participants</b><br/>80 patients (41 Intervention and 39 Control)<br/>Age: 51.0 (all less 70)<br/>% male: 46%<br/>HbA1c <math>\geq</math> 8.0%<br/>Mean HbA1c 10.1<br/>Mean BP: NR<br/>% insulin baseline: 30%<br/>Diabetes duration: NR</p> <p><b>Practitioner and practice participants</b><br/>1 clinic<br/>1 pharmacist case manager</p>                                                                                                                                          | Pharmacist case management                                                                                                                 | Organisational.  | <p>Primary outcome:<br/>HbA1c level at 12 months</p> <p>Secondary outcomes: Rates of diabetes process measures (LDL, dilated retinal examination, urine ACR or use of ACE Inhibitors, monofilament testing for diabetic neuropathy, by chart review over 24 months); Rate of HbA1c measurement.</p> | 12 month intervention with primary outcome reporting at 12 months and a further 24 month follow up. |
| Crowley<br>2015<br>USA                     | <p><b>Patient participants</b><br/>50 patients (25 Intervention and 25 Control)<br/>Age: 60<br/>% male: 24%<br/>HbA1c &gt; 9%<br/>Definition: Yes, defined as 'persistently poor diabetes'<br/>Mean HbA1c 10.5%<br/>Mean SBP: 127/ 80<br/>% insulin baseline: NR<br/>Diabetes duration: 12</p> <p><b>Practitioner and practice participants</b><br/>Patients all receiving care by Durham VA primary care and endocrinology</p>                                                                     | Intensive telemedicine intervention for veterans                                                                                           | Organisational   | <p>Primary outcome:<br/>HbA1c</p> <p>Secondary outcomes: Diabetes self-management (Self-care inventory revised); Depression (PHQ-9); Self reported medication adherence (Morisky medication adherence); BP; Adverse events; Telephone encounters</p>                                                | 6 months                                                                                            |
| Dale<br>2009<br>England<br>Exploratory RCT | <p><b>Patient participants</b><br/>231 (90 (PS) Intervention 1, 44 (NS) Intervention 2 and 97 Control)<br/>Age: No mean age provided, but wide spectrum of ages from below 50 to over 70 in each of the intervention and control groups.<br/>% male: 57%<br/>HbA1c <math>\geq</math> 7.5%<br/>Mean HbA1c: 8.6%<br/>Mean BP: NR<br/>% insulin baseline: 0%<br/>Diabetes duration: No mean, but between 1- 15 years mostly.</p> <p><b>Practitioner and practice participants</b><br/>29 practices</p> | <p>Two intervention telecare groups:</p> <p>a) Peer-support telecare intervention</p> <p>b) Diabetic specialist nurse telecare support</p> | Patient-centred. | <p>Primary outcome:<br/>Self efficacy (DMSES)</p> <p>Secondary outcomes: HbA1c; Cholesterol; BMI. Diabetes distress (PAID)</p>                                                                                                                                                                      | 6 months                                                                                            |

|                                                                    |                                                                                                                                                                                                                                                                                                                                                                                                                                                                                      |                                                                                                                                          |                 |                                                                                                                                                                                                                                        |           |
|--------------------------------------------------------------------|--------------------------------------------------------------------------------------------------------------------------------------------------------------------------------------------------------------------------------------------------------------------------------------------------------------------------------------------------------------------------------------------------------------------------------------------------------------------------------------|------------------------------------------------------------------------------------------------------------------------------------------|-----------------|----------------------------------------------------------------------------------------------------------------------------------------------------------------------------------------------------------------------------------------|-----------|
|                                                                    | Peer coaching or diabetes specialist nurse delivered                                                                                                                                                                                                                                                                                                                                                                                                                                 |                                                                                                                                          |                 |                                                                                                                                                                                                                                        |           |
| DePue<br>2013<br>U.S. Territory of America<br>Somoa<br>Cluster RCT | <p><b>Patient participants</b><br/>268 patients (104 Intervention and 164 Control)<br/>Age: 55<br/>% male: 38%</p> <p>Intervention did not target poor control per se, mean baseline HbA1c of 9.6% (SD of 2.1%) was deemed eligible for inclusion<br/>Mean HbA1c 9.8<br/>Mean BP: 133/ 84<br/>% insulin baseline: NR<br/>Mean diabetes duration: NR</p> <p><b>Practitioner and practice participants</b><br/>Cluster RCT based upon twelve village units<br/>Nurse care managers</p> | Nurse–Community Health Worker Team in American Somoa                                                                                     | Organisational. | <p>Primary outcome:<br/>HbA1c</p> <p>Secondary outcomes: BP; BMI; Dietary intake; Medication adherence; Physical activity; Adapted measures of diabetes beliefs</p>                                                                    | 12 months |
| Edelman<br>2010<br>North Carolina and Virginia, USA.               | <p><b>Patient participants</b><br/>239 patients (133 Intervention and 106 Control)<br/>Age: 61.9<br/>% male: 96%</p> <p>T2DM HbA1c &gt;7.5 AND (SPB &gt; 140 DBP &gt; 90)<br/>Mean HbA1c: 9.2%<br/>Mean BP: 152/ 84<br/>% insulin baseline: unclear<br/>Duration of diabetes: NR</p> <p><b>Practitioner and practice participants</b><br/>2 VA centres<br/>A care team involving internist, pharmacist, a nurse and educator</p>                                                     | Enrollment into a general medical clinic (GMC) with an internist, pharmacist and a nurse or educator that met seven times over 12 months | Organisational. | <p>Primary outcomes:<br/>HbA1c</p> <p>Secondary outcomes: Systolic blood pressure; Adherence to medications; Self-efficacy; Adverse events through structured self report and medical record review; Health utilization; Cost data</p> | 12 months |
| Edelman<br>2015<br>USA                                             | <p><b>Patient participants</b><br/>377 patients (193 Intervention and 184 Control)<br/>Age: 58.7<br/>% male: 45.4%</p> <p>HbA1c <math>\geq</math> 7.5 (and HTN)<br/>Mean HbA1c 9.1%<br/>Mean BP: 142.2/ 80.7<br/>% insulin baseline: NR</p>                                                                                                                                                                                                                                          | Nurse case management                                                                                                                    | Organisational  | <p>Primary outcome:<br/>HbA1c</p> <p>Secondary outcomes: BP; Weight; Physical activity; Self-efficacy; Health literacy; Medication adherence (via self report)</p>                                                                     | 24 months |

|                         |                                                                                                                                                                                                                                                                                                                                                                                                   |                                                                                                                                                                                                                                                    |                 |                                                                                                                                                                                                                                                                                                                                                                                                                             |                                                          |
|-------------------------|---------------------------------------------------------------------------------------------------------------------------------------------------------------------------------------------------------------------------------------------------------------------------------------------------------------------------------------------------------------------------------------------------|----------------------------------------------------------------------------------------------------------------------------------------------------------------------------------------------------------------------------------------------------|-----------------|-----------------------------------------------------------------------------------------------------------------------------------------------------------------------------------------------------------------------------------------------------------------------------------------------------------------------------------------------------------------------------------------------------------------------------|----------------------------------------------------------|
|                         | Diabetes duration: NR<br><b>Practitioner and practice participants</b><br>9 primary care practices in Duke.                                                                                                                                                                                                                                                                                       |                                                                                                                                                                                                                                                    |                 |                                                                                                                                                                                                                                                                                                                                                                                                                             |                                                          |
| Farmer<br>2012<br>UK    | <b>Patient participants</b><br>211 patients (126 Intervention and 85 Control)<br>Age: 63.2<br>% male: 65%<br>HbA1c $\geq$ 7.5%<br>Mean HbA1c: 8.3%<br>Mean BP: 136.9/ 78.2<br>% insulin baseline: NR<br>Mean diabetes duration: 6.8 years<br><b>Practitioner and practice participants</b><br>13 practices<br>Practice nurses                                                                     | Nurse-led, multilevel intervention to support medication adherence                                                                                                                                                                                 | Organisational  | Primary outcome:<br>% days over a 12 week period on which the correct number of doses of main glucose lowering medication was taken each day as prescribed.<br><br>Secondary outcomes: Hba1c at 0 and 20 weeks (from protocol); Functional status as per SF 12 Physical and SF 12 Mental; Diabetes treatment satisfaction and satisfaction with nurse; MARS Self reported adherence (range 5-25); % reporting hypoglycaemia | 12 weeks (intervention was 8 weeks into a 20 week trial) |
| Forjough<br>2014<br>USA | <b>Patient participants</b><br>376 patients (101 Intervention 1 (CDSMP), 81 Intervention 2 (PDA), 99 Intervention 3 (PDA, CDSMP and 95 Control)<br>Age: 57.6<br>% male: 44.0%<br>HbA1c >7.5%<br>Mean HbA1c: 9.3<br>Mean BP: 134.8/ 77<br>% insulin baseline: NR<br>Mean diabetes duration: NR<br><b>Practitioner and practice participants</b><br>7 practices involved<br>Technology intervention | Three intervention groups, reflecting the individual and combined effects of a behavioural and technology intervention; a chronic Disease Self-Management Program (CDSMP) and a diabetes self-care software on a personal digital assistant (PDA). | Patient-centred | Primary:<br>HbA1c<br><br>Secondary: BMI; BP; Self management behavioural measures (e.g. foot care)                                                                                                                                                                                                                                                                                                                          | 12 months                                                |
| Frosch<br>2011<br>USA   | <b>Patient participants</b><br>201 patients (100 Intervention and 101 Control)<br>Age: 55.5<br>% male: 51.5%<br>HbA1c > 8.0<br>Mean HbA1c: 9.6%<br>Mean BP: 127.7/ 74.0<br>% insulin baseline: NR<br>Mean diabetes duration: 9.5<br><b>Practitioner and practice participants</b><br>3 academic primary care practices and 1                                                                      | A video behavioural support intervention by nurse educators with a workbook followed by 5 sessions of telephone coaching.                                                                                                                          | Patient-centred | Primary:<br>HbA1c<br><br>Secondary: LDL Cholesterol; BP; BMI; Prescribed medications; Diabetes knowledge (23 point Diabetes knowledge test); Self-care behaviours (SDSCA)                                                                                                                                                                                                                                                   | Unclear, possibly over 6 months                          |



|                          |                                                                                                                                                                                                                                                                                                                                                                          |                                                                                                                  |                 |                                                                                                                                                                                 |           |
|--------------------------|--------------------------------------------------------------------------------------------------------------------------------------------------------------------------------------------------------------------------------------------------------------------------------------------------------------------------------------------------------------------------|------------------------------------------------------------------------------------------------------------------|-----------------|---------------------------------------------------------------------------------------------------------------------------------------------------------------------------------|-----------|
|                          | community based safety net clinic<br>Nurse educators                                                                                                                                                                                                                                                                                                                     |                                                                                                                  |                 |                                                                                                                                                                                 |           |
| Guerci<br>2003<br>France | <b>Patient participants</b><br>988 patients (510 Intervention and 478 Control)<br>Age: 60.6<br>% male: 53.7%<br>HbA1c $\geq$ (7.5 and 11)<br>diabetes.<br>Mean HbA1c 8.95%<br>Mean SBP: 139.6, 80.4<br>% insulin baseline: 0%<br>Mean diabetes duration months: 96.6<br><b>Practitioner and practice participants</b><br>265 GPs involved, uncertain number of practices | A self-monitoring of blood glucose<br>intervention<br><br>Auto-Surveillance Intervention Active<br>(ASIA) study. | Patient-centred | Primary:<br>HbA1c<br><br>Secondary: Changes in fasting glucose; Symptomatic<br>hyoglycaemia; BP; Weight; Diet; Drugs; Adverse drug event                                        | 6 months  |
| Heisler<br>2010<br>USA   | <b>Patient participants</b><br>244 patients (126 Intervention and 119 Control<br>(NCM))<br>Age: 62.0<br>% male: 100%<br>HbA1c > 7.5%<br>Mean HbA1c 7.98<br>Mean BP: 138.4/ 76.5<br>% insulin baseline: 56%<br>Diabetes duration: NR<br><b>Practitioner and practice participants</b><br>Two VA facilities<br>Nurse and peer case managers                                | Reciprocal peer support                                                                                          | Patient-centred | Primary<br>HbA1c 6 months<br><br>Secondary: Medication adherence; Diabetes emotional<br>distress; Diabetes specific social support; Medication<br>changes Attendance at clinics | 6 months  |
| Jacobs<br>2012<br>USA    | <b>Patient participants</b><br>396 patients (195 Intervention and 201 Control)<br>Age: 62.9<br>% male: 50%<br>HbA1c > 8.0%<br>Mean HbA1c 9.35<br>Mean BP: 138.7/ 78.9<br>% insulin baseline: NR<br>Mean diabetes duration: NR<br><b>Practitioner and practice participants</b><br>5 pharmacists, patients came from practices of                                         | A pharmacist assisted medication<br>program intervention                                                         | Organisational  | Primary<br>No specific primary outcome given or sample size:<br><br>Secondary: HbA1c < 7%; LDL Cholesterol < 100mg/dl; BP <<br>130/ 80mmHg                                      | 12 months |

|                          |                                                                                                                                                                                                                                                                                                                                                                |                                                                |                 |                                                                                                                                                                                                                                                                                                                                                                                                   |                     |
|--------------------------|----------------------------------------------------------------------------------------------------------------------------------------------------------------------------------------------------------------------------------------------------------------------------------------------------------------------------------------------------------------|----------------------------------------------------------------|-----------------|---------------------------------------------------------------------------------------------------------------------------------------------------------------------------------------------------------------------------------------------------------------------------------------------------------------------------------------------------------------------------------------------------|---------------------|
|                          | 66 primary care physicians.                                                                                                                                                                                                                                                                                                                                    |                                                                |                 |                                                                                                                                                                                                                                                                                                                                                                                                   |                     |
| Jameson<br>2010<br>USA   | <p><b>Patient participants</b><br/>104 patients (52 Intervention and 52 Control)<br/>Age: 49.6<br/>% male: 49%<br/>HbA1c <math>\geq</math> 9.0% (two of the population had T1DM)<br/>Mean HbA1c: 10.8%<br/>Mean BP: NR<br/>% insulin baseline: 49.6%<br/>Mean diabetes duration: NR</p> <p><b>Practitioner and practice participants</b><br/>1 pharmacist.</p> | A pharmacist collaborative management intervention             | Organisational  | <p>Primary:<br/>HbA1c</p> <p>Secondary: % of patients with a 1.0% decrease in HbA1c.</p>                                                                                                                                                                                                                                                                                                          | 12 months           |
| Jovanovic<br>2004<br>USA | <p><b>Patient participants</b><br/>362 patients (186 Intervention and 172 Control)<br/>Age: 57.0<br/>% male: 23.8%<br/>HbA1c &gt; 7.5<br/>Mean HbA1c: 9.65%<br/>Mean BP: 135/ 79<br/>% insulin baseline: NR<br/>Mean diabetes duration: 11.1</p> <p><b>Practitioner and practice participants</b><br/>Unclear number of case managers and practices</p>        | Diabetes case management by a nurse or dietician               | Organisational  | <p>Primary:<br/>HbA1c</p> <p>Secondary: % participants achieving HbA1c goals medication usage; BP ; Lipids; BMI; Frequency of hypoglycaemia</p>                                                                                                                                                                                                                                                   | 36 months           |
| Keogh<br>2011<br>Ireland | <p><b>Patient participants</b><br/>121 patients (60 Intervention and 61 Control)<br/>Age: 58.6<br/>% male: 64%<br/>HbA1c <math>\geq</math> 8.0%<br/>Median HbA1c: 9.2<br/>Mean BP: 138.8/ 76.8<br/>% insulin baseline: 52%<br/>Mean diabetes duration: 9.4</p> <p><b>Practitioner and practice participants</b><br/>One practice<br/>One psychologist</p>      | Psychological family intervention                              | Organisational  | <p>Primary outcome:<br/>Hba1c</p> <p>Secondary outcomes: Illness perceptions (Brief illness Perception Questionnaire); Psychological wellbeing (12-item Well-Being questionnaire); BP; BMI; Diabetes self management (Summary of Diabetes Self-care Activities Questionnaire); Self Efficacy (UK version Diabetes Self-Efficacy Scale); Family support (Diabetes Family Behaviour Checklist).</p> | 6 months            |
| Kim<br>2009              | <p><b>Patient participants</b><br/>83 patients (41 Intervention and 42 Control)<br/>Age: 56.4</p>                                                                                                                                                                                                                                                              | A Community-based, culturally tailored behavioral intervention | Patient-centred | <p>Primary:<br/>HbA1c</p>                                                                                                                                                                                                                                                                                                                                                                         | 30 weeks (7 months) |

|                           |                                                                                                                                                                                                                                                                                                                                                                                                                                                                            |                                                                                              |                 |                                                                                                                                                                                                                                                                                                    |                      |
|---------------------------|----------------------------------------------------------------------------------------------------------------------------------------------------------------------------------------------------------------------------------------------------------------------------------------------------------------------------------------------------------------------------------------------------------------------------------------------------------------------------|----------------------------------------------------------------------------------------------|-----------------|----------------------------------------------------------------------------------------------------------------------------------------------------------------------------------------------------------------------------------------------------------------------------------------------------|----------------------|
| USA                       | <p>% male: 55.4%</p> <p>HbA1c <math>\geq</math> 7.5%</p> <p>Mean HbA1c: 9.25%</p> <p>Mean BP 132.1/ 79.3</p> <p>% insulin baseline: NR</p> <p>Mean diabetes duration: NR</p> <p><b>Practitioner and practice participants</b></p> <p>Uncertain number practices</p> <p>Community nurse delivered</p>                                                                                                                                                                       |                                                                                              |                 | <p>Secondary: Diabetes knowledge test (DKT)* Self efficacy (Stanford Chronic Disease Self-Efficacy scale); Self care (Diabetes self care activitiis (SDSCA); Depression (Kim Depression Scale for Korean Americans); Quality of Life (Diabetes Quality of Life Measure (DQQL); Lipids; BP; BMI</p> | 6 month intervention |
| Krein<br>2004<br>USA      | <p><b>Patient participants</b></p> <p>246 patients (123 Intervention and 123 Control)</p> <p>Age: 61</p> <p>% male: 97%</p> <p>HbA1c <math>\geq</math>7.5%</p> <p>Mean HbA1c 9.25</p> <p>Mean BP: 145/ 86</p> <p>% insulin baseline: 59%</p> <p>Mean diabetes duration: 11</p> <p><b>Practitioner and practice participants</b></p> <p>One VA centre, unclear number of practices</p> <p>Two nurse case managers</p>                                                       | Case management by nurse practitioners                                                       | Organisational  | <p>Primary: HbA1c</p> <p>Secondary: LDL; Cholesterol; BP; Health status; Patient satisfaction; Inpatient and outpatient encounters, pharmacy and laboratory use; Semi structured interviews also done.</p>                                                                                         | 18 months            |
| Long<br>2012<br>USA       | <p><b>Patient participants</b></p> <p>118 patients (38 Intervention 1 (PM), 40 Intervention 2 (FI) and 39 Control)</p> <p>Age: 60</p> <p>% male: 94%</p> <p>HbA1c &gt; 8.0% (two patients may have had T1DM)</p> <p>HbA1c Mean: 9.7</p> <p>Mean BP: NR</p> <p>% insulin baseline: 74%</p> <p>Mean diabetes duration: NR</p> <p>Diabetes over 10 years: 58%</p> <p><b>Practitioner and practice participants</b></p> <p>Unclear number of practices</p> <p>Peer mentors</p> | <p>Two interventions:</p> <p>Peer mentoring</p> <p>Financial incentivisation of patients</p> | Patient-centred | <p>Primary: Hba1c</p> <p>Secondary: Patient recollection of hypoglycaemic event</p>                                                                                                                                                                                                                | 6 months             |
| Maislos<br>2002<br>Israel | <p><b>Patient participants</b></p> <p>82 patients (48 Intervention and 34 Control)</p> <p>Age: 60.5</p> <p>% male: 29.5%</p> <p>HbA1c <math>\geq</math> 10%</p>                                                                                                                                                                                                                                                                                                            | A mobile clinic providing interdisciplinary care                                             | Organisational  | <p>Primary: Decrease of HbA1c of 0.5% at six months</p> <p>Secondary: Compliance with study protocol at six months</p>                                                                                                                                                                             | 6 months             |

|                                                            |                                                                                                                                                                                                                                                                                                                                                                                             |                                                                                                                                                                                                 |                       |                                                                                                                                                                                                                                                                                                 |                  |
|------------------------------------------------------------|---------------------------------------------------------------------------------------------------------------------------------------------------------------------------------------------------------------------------------------------------------------------------------------------------------------------------------------------------------------------------------------------|-------------------------------------------------------------------------------------------------------------------------------------------------------------------------------------------------|-----------------------|-------------------------------------------------------------------------------------------------------------------------------------------------------------------------------------------------------------------------------------------------------------------------------------------------|------------------|
|                                                            | <p>Mean HbA1c 11.35<br/> Mean BP: NR<br/> % insulin baseline: 20%<br/> Duration diabetes: 10<br/> <b>Practitioner and practice participants</b><br/> 2 practices involved via 1 mobile clinic</p>                                                                                                                                                                                           |                                                                                                                                                                                                 |                       |                                                                                                                                                                                                                                                                                                 |                  |
| <p>Mathers<br/> 2012<br/> UK<br/> Cluster RCT</p>          | <p><b>Patient participants</b><br/> 175 patients (95 Intervention and 80 Control)<br/> Age: 64<br/> % male: 54%<br/> HbA1c <math>\geq</math> 7.5<br/> Mean HbA1c: 8.7%<br/> Mean BP: NR<br/> % insulin baseline: NR<br/> Duration diabetes: 7.8<br/> <b>Practitioner and practice participants</b><br/> 49 practices involved<br/> GPs and nurses from practices delivered intervention</p> | <p>Patient decision aid to improve decision quality and glycaemic control</p>                                                                                                                   | <p>Professional</p>   | <p>Primary:<br/> HbA1c</p> <p>Secondary: Decisional conflict scale score- indicator of decision quality; Knowledge and realistic expectations of the risks and benefits; Regret scale</p>                                                                                                       | <p>6 months</p>  |
| <p>McDermott<br/> 2015<br/> Australia<br/> Cluster RCT</p> | <p><b>Patient participants</b><br/> 213 patients (113 Intervention and 100 Control)<br/> Age: 47.9<br/> % male: 37.6%<br/> HbA1c <math>\geq</math> 8.5 (69mmol/mol)<br/> Mean HbA1c 10.7<br/> Mean BP: 131/ 79.3<br/> % insulin baseline: 44.4%<br/> Diabetes duration: NR<br/> <b>Practitioner and practice participants</b><br/> 12 remote communities in north Queensland.</p>           | <p>Community-based health-worker led case management approach to the care of Indigenous adults with poorly controlled type 2 diabetes in primary care services in remote northern Australia</p> | <p>Organisational</p> | <p>Primary outcome:<br/> HbA1c level at 18 months</p> <p>Secondary outcomes:<br/> BP<br/> BMI<br/> Lipids<br/> Medications<br/> ACR<br/> eGFR<br/> Test of Functional Health Literacy for Adults (TOFHLA)<br/> Assessment of Quality of Life (AQoL) instrument<br/> Implementation Fidelity</p> | <p>18 months</p> |
| <p>McMahon<br/> 2005<br/> USA</p>                          | <p><b>Patient participants</b><br/> 104 patients (52 Intervention and 52 Control)<br/> Age: 63.5<br/> % male: 99%<br/> HbA1c <math>\geq</math> 9%<br/> Mean HbA1c: 10.0%<br/> Mean BP: 140/ 81<br/> % insulin baseline: 54%<br/> Duration diabetes: 12.3 years</p>                                                                                                                          | <p>Web-based care management</p>                                                                                                                                                                | <p>Organisational</p> | <p>Primary:<br/> HbA1c</p> <p>Secondary<br/> Systolic BP<br/> Diastolic BP<br/> TAG<br/> LDL Cholesterol<br/> HDL Cholesterol</p>                                                                                                                                                               | <p>12 months</p> |

1  
2  
3  
4  
5  
6  
7  
8  
9  
10  
11  
12  
13  
14  
15  
16  
17  
18  
19  
20  
21  
22  
23  
24  
25  
26  
27  
28  
29  
30  
31  
32  
33  
34  
35  
36  
37  
38  
39  
40  
41  
42  
43  
44  
45  
46  
47  
48  
49

|                                        |                                                                                                                                                                                                                                                                                                                                                                                                 |                                                                                                  |                 |                                                                                                                                                                                                                                      |                                             |
|----------------------------------------|-------------------------------------------------------------------------------------------------------------------------------------------------------------------------------------------------------------------------------------------------------------------------------------------------------------------------------------------------------------------------------------------------|--------------------------------------------------------------------------------------------------|-----------------|--------------------------------------------------------------------------------------------------------------------------------------------------------------------------------------------------------------------------------------|---------------------------------------------|
|                                        | <b>Practitioner and practice participants</b><br>Practice number unclear<br>Care manager available                                                                                                                                                                                                                                                                                              |                                                                                                  |                 |                                                                                                                                                                                                                                      |                                             |
| Mons<br>2013<br>Germany                | <b>Patient participants</b><br>204 patients (103 Intervention and 101 Control)<br>Age: 67.5<br>% male: 61%<br>HbA1c > 7.5%<br>Mean HbA1c: 8.1%<br>Mean BP: 137.5/ 80<br>% insulin baseline: NR<br>Duration diabetes: NR<br><b>Practitioner and practice participants</b><br>10 GP practices<br>Practice nurses                                                                                  | Supportive telephone counseling                                                                  | Patient-centred | Primary<br>HbA1c<br><br>Secondary Systolic BP; Diastolic BP; Cholesterol; Health related quality of life (Short Form General Health Survey: SF-12); Symptoms of depression: Geriatric depression scale                               | 18 months                                   |
| O'Connor<br>2014<br>USA<br>Cluster RCT | <b>Patient participants</b><br>1102 patients (569 Intervention and 533 Control)<br>Age: 43% ≥ 65 years. ~ 61 mean<br>% male: 51.3%<br>HbA1c ≥ 8%<br>Mean HbA1c: 9.8%<br>Mean BP: NR<br>% insulin baseline: NR<br>Diabetes duration: NR<br><b>Practitioner and practice participants</b><br>Large medical groups in California.<br>Clusters defined on their linkage to primary care physicians. | Telephone Outreach to Improve Medication Adherence and Metabolic Control in Adults With Diabetes | Organisational  | Primary Outcome:<br>Medication adherence (at least one prescription fill within 60 days of prescription date).<br><br>Secondary Outcomes: Medication persistence (two or more prescription fills within 180 days); HbA1c; BP; Lipids | 6 months                                    |
| Odegard<br>2005<br>USA                 | <b>Patient participants</b><br>77 patients (43 Intervention and 34 Control)<br>Age: 51.8<br>% male: 57%<br>HbA1c ≥ 9.0%<br>Mean HbA1c: 10.4%<br>Mean BP: NR<br>% insulin baseline: 32%<br>Duration diabetes: 7.6<br><b>Practitioner and practice participants</b><br>7 primary care clinics                                                                                                     | A pharmacist intervention care management intervention                                           | Organisational  | Primary<br>HbA1c 12 months<br><br>Secondary: Medication appropriateness (Medication Appropriate Index/ MAI); Self reported adherence by questionnaire                                                                                | 6 month intervention but HbA1c at 12 months |

|                                        |                                                                                                                                                                                                                                                                                                                                                                            |                                                                      |                 |                                                                                                                                                                                                                                  |                                                                                         |
|----------------------------------------|----------------------------------------------------------------------------------------------------------------------------------------------------------------------------------------------------------------------------------------------------------------------------------------------------------------------------------------------------------------------------|----------------------------------------------------------------------|-----------------|----------------------------------------------------------------------------------------------------------------------------------------------------------------------------------------------------------------------------------|-----------------------------------------------------------------------------------------|
|                                        | Pharmacists: Unclear number                                                                                                                                                                                                                                                                                                                                                |                                                                      |                 |                                                                                                                                                                                                                                  |                                                                                         |
| Palmas<br>2014<br>USA                  | <p><b>Patient participants</b><br/>360 patients (181 Intervention and 179 Control)<br/>Age: 57.6<br/>% male: 38%<br/>HbA1c <math>\geq</math> 8.0%<br/>Mean HbA1c: 8.7%<br/>Mean BP: 136/ 81<br/>% insulin baseline: NR<br/>Duration diabetes: NR</p> <p><b>Practitioner and practice participants</b><br/>Unclear number GP practices<br/>Two community health workers</p> | Community health worker (CHW) intervention in an Hispanic population | Patient-centred | <p>Primary:<br/>HbA1c</p> <p>Secondary: Systolic BP; Diastolic BP; LDL Cholesterol; Medication adherence; Dosage and intensity; Physical activity; Diet; Depression</p>                                                          | 12 months                                                                               |
| Phillis-Tsimikas<br>2011<br>USA        | <p><b>Patient participants</b><br/>207 patients (104 Intervention and 103 Control)<br/>Age: 50.7<br/>% male: 29.5%<br/>HbA1c &gt; 8.0%<br/>Mean HbA1c: 10.4%<br/>Mean BP: 122.6/75<br/>Duration diabetes: NR<br/>% insulin baseline: NR</p> <p><b>Practitioner and practice participants</b><br/>Unclear number GP practices participating<br/>Peer educators</p>          | Peer-led diabetes education programs in high-risk Mexican Americans  | Patient-centred | <p>Primary:<br/>HbA1c</p> <p>Secondary: Lipids; BP; BMI; Self management behaviours and Depression (in separate publication)</p>                                                                                                 | 10 months<br><br>Intervention was 4 months and primary outcome was 6 months after this. |
| Polonsky<br>2011<br>USA<br>Cluster RCT | <p><b>Patient participants</b><br/>499 patients (256 Intervention and 227 Control)<br/>Age: 55.8<br/>% male: 53.2%<br/>HbA1c &gt; 7.5%<br/>Mean HbA1c: 8.9<br/>Mean BP: NR<br/>% on insulin: 0%<br/>Duration diabetes: 7.6</p> <p><b>Practitioner and practice participants</b><br/>34 GP practices participating</p>                                                      | Self blood glucose monitoring                                        | Patient-centred | <p>Primary:<br/>Hba1c</p> <p>Secondary: Treatment intensification; Total number of visits with medication or lifestyle modifications; Time to the first treatment change; Frequency of SMBG; GWB from WHO-5 Well-Being Index</p> | 12 months                                                                               |
| Protheroe                              | <b>Patient participants</b>                                                                                                                                                                                                                                                                                                                                                | Lay Health Trainer (LHT) interviews with                             | Organisational  | Feasibility study                                                                                                                                                                                                                | 7 months                                                                                |

|                                     |                                                                                                                                                                                                                                                                                                                                                                                                                                                             |                                                                                   |                 |                                                                                                                                                                                                                                                               |           |
|-------------------------------------|-------------------------------------------------------------------------------------------------------------------------------------------------------------------------------------------------------------------------------------------------------------------------------------------------------------------------------------------------------------------------------------------------------------------------------------------------------------|-----------------------------------------------------------------------------------|-----------------|---------------------------------------------------------------------------------------------------------------------------------------------------------------------------------------------------------------------------------------------------------------|-----------|
| 2016                                | 76 Patients (37 Intervention and 39 Control)<br>Mean age: 63.1<br>% male: 50.3%<br>T2DM with HbA1c > 7.5%<br>Mean HbA1c: 9.3<br>Mean BP: NR<br>% insulin baseline: NR<br>Mean diabetes duration: 61% > 5 years<br><b>Practitioner and practice participants</b><br>From six family doctor practices                                                                                                                                                         | patients, creating a self-management plan, with supportive phone calls.           |                 | Outcomes included: Deprivation; Health literacy; Diabetes self care; Diabetes Quality of Life; Diabetes UK Scale Items, Health-related Quality of Life, Warwick- Edinburgh Mental Well-Being, Illness Perception, health Status Measure, Resource Use, HbA1c. |           |
| UK<br>Feasibility study             |                                                                                                                                                                                                                                                                                                                                                                                                                                                             |                                                                                   |                 |                                                                                                                                                                                                                                                               |           |
| Quinn<br>2011<br>USA<br>Cluster RCT | <b>Patient participants</b><br>Cluster trial, 3 intervention groups, 1 control<br>163 patients (Intervention 1 (CO) 23, Intervention 2 (CPP) 22, Intervention 3 (CPDS) 62 and Control 56)<br>Age: 52.9 (weighted average)<br>% male: 52.5% (weighted average)<br>HbA1c ≥ 7.5%<br>Mean HbA1c: 9.4<br>Mean SBP: 131/ NR<br>% insulin baseline: NR<br>Duration diabetes: 8.2<br><b>Practitioner and practice participants</b><br>26 GP practices participating | Mobile phone-based treatment/ behavioural coaching intervention                   | Patient-centred | Primary:<br>HbA1c<br><br>Secondary: PHQ-9 questionnaire for depressive symptoms; Self completion patient outcome instrument; Diabetes Distress Scale; BP; Lipids; Hypoglycaemic events; Hospitalisations and ED visits                                        | 12 months |
| Rothman<br>2005<br>USA              | <b>Patient participants</b><br>217 patients (112 Intervention and 105 Control)<br>Age: 55.5<br>% male: 44%<br>HbA1c ≥ 8.0%<br>Mean HbA1c: 11<br>Mean BP: 138.5/ 81<br>% insulin baseline: 39%<br>Duration diabetes: 8.5<br><b>Practitioner and practice participants</b><br>Three pharmacists                                                                                                                                                               | A primary care-based disease management program delivered by trained pharmacists. | Organisational  | Primary:<br>HbA1c<br><br>Secondary: BP; Aspirin; Lipids; Diabetes knowledge Satisfaction (Diabetes Treatment Satisfaction Questionnaire); Use of clinical services; Adverse events; Process measures (time spent with patients and medication changes)        | 12 months |
| Schillinger<br>2009                 | <b>Patient participants</b><br>339 patients (112 intervention 1 (ATSM), 113 intervention 2 (GVC) and 114 Control)<br>Age: 56.1                                                                                                                                                                                                                                                                                                                              | Two interventions:<br><br>Self-Management Support via 1/                          | Patient-centred | Primary:<br>Self management behaviour<br><br>Secondary: Patient assessment of chronic illness care                                                                                                                                                            | 12 months |

|                         |                                                                                                                                                                                                                                                                                                                                                                                                                  |                                                                                        |                 |                                                                                                                                                                                                                                                                              |           |
|-------------------------|------------------------------------------------------------------------------------------------------------------------------------------------------------------------------------------------------------------------------------------------------------------------------------------------------------------------------------------------------------------------------------------------------------------|----------------------------------------------------------------------------------------|-----------------|------------------------------------------------------------------------------------------------------------------------------------------------------------------------------------------------------------------------------------------------------------------------------|-----------|
| USA                     | % male: 41 %<br>HbA1c $\geq$ 8.0%<br>Mean HbA1c: 9.5%<br>Mean BP: 140/ 77.3<br>% insulin baseline: 38%<br>Duration diabetes: 9.5<br><b>Practitioner and practice participants</b><br>Uncertain number GPs- in a safety net health system                                                                                                                                                                         | Automated telephone self management support (ATSM) and 2/ Group medical visits (GMVs). |                 | (PACIC); Diabetes Quality Improvement Program; Interpersonal Processes of Care for Diverse Populations (IPC) instrument; Self management behavior (Foods, diets, exercise, self monitoring); SF-12 instrument for QoL; Functional status- likert scale; HbA1c; SBP; DBP; BMI |           |
| Sen<br>2014<br>USA      | <b>Patient participants</b><br>75 patients (21 Intervention 1 (low), 26 Intervention 2 (high) and 28 Control)<br>Age: 54.3<br>% male: 36%<br>HbA1c $\geq$ 7.5% (90-95% had T2DM from personal correspondence with author)<br>Mean HbA1c 9.5%<br>Mean BP: 132.9/ 86.1<br>% insulin baseline: NR<br>Mean diabetes duration: NR<br><b>Practitioner and practice participants</b><br>1 practice                      | Financial incentives for home based monitoring- two interventions                      | Financial       | Primary:<br>Adherence over three months<br><br>Secondary: HbA1c                                                                                                                                                                                                              | 12 weeks  |
| Sugiyama<br>2015<br>USA | <b>Patient participants</b><br>516 patients (258 Intervention and 258 Control)<br>Age: 63<br>% male: 30%<br>HbA1c $\geq$ 8.0%<br>Mean HbA1c: 9.7<br>Mean BP: NR<br>% insulin baseline: NR<br>Diabetes duration: NR<br><b>Practitioner and practice participants</b><br>Participants were recruited from senior centers, churches, community clinics, and Los Angeles County Community and Senior Service Centers | Diabetes self management education by trained health educators.                        | Patient-centred | Primary:<br>HbA1c<br><br>Secondary: Change Mental Component Summary Score (MCS-12) from the SF-12; Social support score from the Diabetes Care Profile                                                                                                                       | 6 months  |
| Tang<br>2013            | <b>Patient participants</b><br>415 patients (203 Intervention and 213 Control)<br>Age: 54<br>% male: 60%                                                                                                                                                                                                                                                                                                         | Online disease management of diabetes                                                  | Patient-centred | Primary:<br>HbA1c<br><br>Secondary: SBP; DBP; LDL; 10 year Framingham risk;                                                                                                                                                                                                  | 12 months |



|                       |                                                                                                                                                                                                                                                                                                                                      |                                                                                                                        |                 |                                                                                                                                                                                                                                                                                                                                                          |           |
|-----------------------|--------------------------------------------------------------------------------------------------------------------------------------------------------------------------------------------------------------------------------------------------------------------------------------------------------------------------------------|------------------------------------------------------------------------------------------------------------------------|-----------------|----------------------------------------------------------------------------------------------------------------------------------------------------------------------------------------------------------------------------------------------------------------------------------------------------------------------------------------------------------|-----------|
| USA                   | HbA1c $\geq$ 7.5%<br>Mean HbA1c: 9.3<br>Mean BP: 126.6/ 72.7<br>% insulin baseline: NR<br>Mean diabetes duration: NR<br><b>Practitioner and practice participants</b><br>Uncertain number practices                                                                                                                                  |                                                                                                                        |                 | Satisfaction; Psychosocial wellbeing; Healthcare utilization                                                                                                                                                                                                                                                                                             |           |
| Taylor<br>2003<br>USA | <b>Patient participants</b><br>169 patients (84 Intervention and 85 Control)<br>Age: 55.2<br>% male: 52.7%<br>HbA1c > 10.0%<br>Mean HbA1c: 9.5%<br>Mean BP: 127.5/ 72.8<br>% insulin baseline: NR<br>Mean diabetes duration NR<br><b>Practitioner and practice participants</b><br>Uncertain number practices<br>Nurse care managers | Nurse care management (NCM)                                                                                            | Organisational  | Primary:<br>% of patients in 'target' HbA1c<br><br>Secondary: Total cholesterol; HDL Cholesterol; LDL cholesterol; TAGs; Glucose; Microalbuminuria; SBP; DBP; Processes of care (foot, eye, dental exam and flu shot); Psychosocial (SF 26 for QoL and Duke Activity Status); Patient and physician satisfaction; Medical utilization (physician visits) | 12 months |
| Thom<br>2013<br>USA   | <b>Patient participants</b><br>299 patients (151 Intervention and 148 Control)<br>Age: 55.2<br>% male: 47.8%<br>HbA1c $\geq$ 8.0%<br>Mean HbA1c: 10.0<br>Mean BP: 143.2/ NR<br>% insulin baseline: 55%<br>Mean diabetes duration: 8.9<br><b>Practitioner and practice participants</b><br>6 practices included<br>Peer coaches       | Peer health coaching                                                                                                   | Patient-centred | Primary:<br>HbA1c<br><br>Secondary: % patients whose HbA1c dropped 1%; % patients with a HbA1c less 7.5; LDL; SBP; BMI                                                                                                                                                                                                                                   | 6 months  |
| Wild<br>2016<br>UK    | <b>Patient participants</b><br>231 Patients (160 Intervention and 161 Control)<br>Mean age: 61<br>% male: 66.8%<br>T2DM with HbA1c > 7.5%<br>Mean HbA1c: 8.9<br>Mean BP: 134/79<br>% insulin baseline: 26%                                                                                                                           | Supported telemonitoring involving twice-weekly self-measurement of glucose and transmission to a general practitioner | Patient-centred | Primary outcomes:<br>HbA1c at 9 months<br><br>Secondary outcomes: BP; BMI; Lipid and TAG profile; eGFR and urine ACR; UKPDS risk score; Anxiety and Depression score; Quality of Life; Diabetes Self efficacy; Self-reported physical activity, alcohol intake, exercise tolerance and diabetes knowledge; healthcare utilization.                       | 9 months  |

1  
2  
3  
4  
5  
6  
7  
8  
9  
10  
11  
12  
13  
14  
15  
16  
17  
18  
19  
20  
21  
22  
23  
24  
25  
26  
27  
28  
29  
30  
31  
32  
33  
34  
35  
36  
37  
38  
39  
40  
41  
42  
43  
44  
45  
46  
47  
48  
49

|  |                                                                                                                        |  |  |  |  |
|--|------------------------------------------------------------------------------------------------------------------------|--|--|--|--|
|  | Mean diabetes duration 7.4<br><b>Practitioner and practice participants</b><br>From 44 practices from four UK regions. |  |  |  |  |
|--|------------------------------------------------------------------------------------------------------------------------|--|--|--|--|

**Glossary of abbreviations:**

ACR (albumin-creatinine ratio), AqoL (assessment of quality of life), ATSM (automated telephone self management support) , BMI (body mass index), BP (blood pressure), CDSMP (chronic disease self-management program) , CO (coach-only), CPDS (coach primary care provider portal with decision support), CPP (coach primary care physician portal), CSQ8 (client satisfaction scale 8), DBP (diastolic blood pressure), DMSES (diabetes management self efficacy scale) , DQOL (diabetes quality of life measure), ED (emergency department), eGFR (estimated glomerular filtration rate), FI (financial incentivisation), GMV (group medical visits), GWB (blobal well being), LDL (low density lipoproetin), MAI (medication appropriate index), MARS (medication adherence rating scale), MCS-12 (mental component summary score), NR (not recorded), PACIC (Patient assessment of chronic illness care), PAID (problems areas in diabetes scale), PDA (personal digital assistant), PHQ-9 (patient health questionnaire 9), PM (peer mentoring), SBP (systolic blood pressure), SDSCA (summary of diabetes self-care behaviours scale), SF-12 (short Form general health survey), T2DM (type 2 diabetes mellitus), TOFHLA (test of functional health literacy for adults), VA (veteran’s affairs), WHO (World Health Organisation).

1  
2  
3  
4 Interventions were all complex with multiple components. Studies were categorised  
5 based on the predominant intervention element using the EPOC taxonomy. The  
6 included interventions were categorised as predominantly patient-centred (n=20,  
7 48%); organisational (n=20, 48%), financial (n=1, 2%) or professional (n=1, 2%). One  
8 study (Long et al. 2012) comprised two intervention arms with a patient-centred and  
9 financial intervention (included as a patient-centred predominant intervention in our  
10 analysis). Descriptions of the interventions are outlined in *Table 1*.

11  
12  
13  
14  
15  
16  
17  
18 The twenty patient-centred interventions in our review included four telephone- (34,  
19 41, 56, 58), five computerised/ mobile phone based- (32, 36, 52, 61, 68), one video-  
20 based- (51), five peer-support- (30, 38, 44, 49, 65), three self-monitoring-based (37,  
21 50, 64) and two-culturally-supportive self-management interventions (39, 45). The  
22 twenty organisational interventions included five pharmacist interventions  
23 performing case management (35, 40, 47, 48, 57), six nurse case management  
24 interventions (23, 31, 46, 53, 55, 60), three web-based/ telemedicine/ telephone  
25 case management interventions (24, 59, 63), three new-clinic-based interventions  
26 (43, 54, 66), one community health-worker intervention (62), one psychological  
27 intervention (22) and one lay health worker intervention (67). Eight interventions  
28 had an mHealth or telehealth component (33, 36, 45, 52, 56, 59, 65, 68). More  
29 detailed descriptions of the interventions are outlined in *Appendix 3*.

### 30 31 32 33 34 35 36 37 38 39 40 41 42 43 44 45 46 47 48 49 50 51 52 53 54 55 56 57 58 59 60

#### *Risk of bias*

All 42 studies were RCTs, with six being cluster RCTs. Overall, 25 studies were  
classified as having a predominant low-risk of bias (59.5%) (22-24, 32-36, 39, 41, 42,  
45, 46, 51, 53-55, 58, 59, 62-66, 68), thirteen studies had an unclear-risk (31%) (30,  
31, 37, 38, 40, 44, 47, 49, 56, 57, 60, 61, 67) and four RCTs were classified as having a  
high-risk of bias (9.5%) (43, 48, 50, 52) (*Appendix 4*). Blinding of outcome assessment  
was classified as low-risk in all studies. Attrition bias was evident in seven studies.  
*Appendix 5* outlines the summary judgements for both overall risk of bias and  
predominant intervention type, which were used in the meta-regression analysis.

There was no evidence of publication bias in the studies included in the HbA1c (p

1  
2  
3 =0.37) or SPB analysis ( $p=0.54$ ). However, there was some evidence of publication  
4 bias in the studies included in the DBP analysis ( $p < 0.01$ ). See *Appendix 6*.

### 7 *Primary outcomes*

#### 10 HbA1c

11  
12 Overall 40 of the 42 studies were included in a meta-analysis, which found a mean  
13 difference (MD) in HbA1c of -3.7 mmol/mol (-0.34%; 95% CI: -0.46%, -0.22%)  
14 favouring intervention groups, but with statistical heterogeneity ( $I^2 = 69%$ ). *Figure*  
15 *2(a)* outlines the overall effect of interventions on HbA1c, across EPOC categories.

16  
17  
18  
19  
20  
21 Subgroup analyses were performed based upon the predominant intervention type  
22 (*Figure 2(a)*), the baseline HbA1c level (*Figure 2(b)*), study duration (*Figure 2(c)*) and  
23 study quality (*Figure 2(d)*). These analyses suggested that organisational  
24 interventions (MD in HbA1c of -5.2 mmol/mol (-0.42%; 95% CI: -0.66%, -0.18%;  $I^2 =$   
25 79%) had better improvements in HbA1c than patient-centred interventions (-0.30%;  
26 95% CI: -0.43%, -0.18%;  $I^2 = 48%$ ) ( $p=0.05$ ). Similarly interventions performed when  
27 the baseline population-HbA1c was over 80mmol/mol (9.5%) (MD in HbA1c of -6.3  
28 mmol/mol (-0.58%; 95% CI: -0.81%, -0.35%;  $I^2 = 75%$ ) had better improvements in  
29 HbA1c than populations with a baseline-HbA1c  $< 9.5%$  (-0.17%; 95% CI: -0.29%, -  
30 0.05%;  $I^2 = 51%$ ) ( $p=0.002$ ). Study duration did not appear to affect HbA1c (*Figure*  
31 *2(c)*). Lastly, studies with a low-risk of bias (MD in HbA1c was -2.8 mmol/mol (-  
32 0.26%; 95% CI: -0.39%, -0.13%;  $I^2 = 59%$ ) appeared to have a smaller reduction in  
33 HbA1c compared to unclear (-0.49%; 95% CI: -0.84%, -0.15%;  $I^2 = 81%$ ) and high-  
34 risk studies (-0.41%; 95% CI: -0.74%, -0.09%;  $I^2 = 61%$ ), but there was no evidence of  
35 a statistically significant difference ( $p=0.35$ ). Though not considered in our original  
36 protocol, subgroup analysis did not highlight additional benefit from those  
37 interventions (included in both organisational and patient-centred intervention  
38 types), which had a telemedicine or mHealth component (*Appendix 7*) (33, 36, 45,  
39 52, 56, 59, 65, 68).

40  
41  
42  
43  
44  
45  
46  
47  
48  
49  
50  
51  
52  
53  
54  
55  
56 As the overall results showed statistical heterogeneity, meta-regression analysis was  
57 also conducted to explore the components of this heterogeneity. As with the meta-  
58  
59  
60

1  
2  
3 analyses, higher baseline HbA1c was associated with a greater reduction in HbA1c  
4 ( $\beta$ -Coefficient: -0.27; 95% CI: -0.41, -0.13;  $p < 0.001$ ). The predominant-intervention  
5 type, risk of bias and study-duration were not associated with improved glycaemic  
6 control.  
7  
8  
9

### 10 Blood pressure

11  
12 Overall there was small improvement in SBP in the twenty-six interventions included  
13 in the meta-analysis, (MD SBP – 1.13 mmHg (95% CI -2.19, -0.08)) with moderate  
14 heterogeneity ( $I^2 = 47%$ ) (*Appendix 8*) (22-24, 30-36, 38, 39, 41, 45, 46, 48-51, 54, 58-  
15 60, 62, 65, 66, 68). DBP improved modestly in the twenty-two studies included in the  
16 meta-analysis (MD DBP – 1.37mmHg (95% CI -2.25, -0.50)) with moderate  
17 heterogeneity ( $I^2 = 44%$ ) (*Appendix 9*) (22-24, 31, 32, 34-36, 38, 39, 41, 45, 46, 48, 49,  
18 51, 54, 58, 59, 62, 65, 66, 68).  
19  
20  
21  
22  
23  
24  
25  
26

27 In the subgroup analysis, organisational interventions appeared to improve SBP  
28 modestly (MD SBP: – 2.69mmHg; 95% CI: -5.11, -0.26;  $I^2 = 57%$ ) compared to patient-  
29 centred interventions (MD SBP: – 0.52mmHg; 95% CI: -1.41, 0.38;  $I^2 = 20%$ ) which  
30 showed no statistically significant improvement (*Appendix 8*). However, there was  
31 no evidence of a statistically significant difference between intervention types.  
32 Similarly with DBP, organisational interventions appeared to improve DBP modestly  
33 (MD DBP: -2.87mmHg; 95% CI: -4.29, -1.45;  $I^2 = 30%$ ) compared to patient-centred  
34 interventions (MD DBP: -1.37mmHg; 95% CI: -1.42, 0.2;  $I^2 = 30%$ ) (*Appendix 9*) and  
35 there was evidence of a statistically significant difference ( $p = 0.007$ ). Meta-regression  
36 analysis was not conducted for SBP or DBP as significant heterogeneity was not  
37 present on the overall effect sizes.  
38  
39  
40  
41  
42  
43  
44  
45  
46

### 47 Lipids

48  
49 Twenty of the 42 studies reported total cholesterol, LDL-cholesterol, HDL-cholesterol  
50 or triacylglycerides (23, 24, 30-32, 35, 36, 38, 39, 41, 45, 46, 48, 51, 56, 58, 62, 65, 66,  
51 68). Statistically significant improvements in lipids were only demonstrated in four of  
52 these 20 studies (31, 32, 45, 48). Baseline lipid levels were generally not reported.  
53  
54 Eleven of the twenty studies reported data relating to total cholesterol. Meta-  
55  
56  
57  
58  
59  
60

1  
2  
3 analysis was undertaken on these studies, which indicated a modest improvement in  
4 total cholesterol, favouring intervention groups (MD Total Cholesterol – 4.29 mg/dl  
5 (95% CI -7.68, -0.89);  $I^2 = 0\%$ ) (*Appendix 10*) (35, 36, 38, 41, 45, 46, 58, 62, 65, 66, 68).  
6  
7

### 8 9 *Secondary outcomes*

10  
11 All but one the 42 included studies reported at least one of the eligible secondary  
12 outcomes (*Appendix 11*). Overall, interventions had very limited effect on secondary  
13 outcomes. Twenty-six studies reported other physical outcomes (e.g. BMI, and  
14 estimated glomerular filtration rate). Of the fifteen studies that reported on weight  
15 or BMI, only one showed significant improvement (56). Ten studies reported mental  
16 health outcomes (36, 38, 41, 45, 58, 59, 64) with two showing a significant  
17 improvement in the Change Mental Component Summary Score and the Short Form-  
18 12 Mental Health Score (64, 67). Twenty-eight studies reported PROMs, eleven  
19 showing an improvement with the intervention. Ten studies reported medication  
20 adherence outcomes, two showing improvement. Eighteen studies reported  
21 utilisation outcomes with four improving processes of care.  
22  
23  
24  
25  
26  
27  
28  
29  
30  
31  
32  
33  
34

## 35 **Discussion**

### 36 37 38 *Statement of principle findings*

39  
40 Healthcare interventions have positive, albeit modest, effects on HbA1c in poorly  
41 controlled T2DM. Interventions targeting those with a higher baseline HbA1c ( $\geq 80$   
42 mmol/mol (9.5%)) show the greatest effects. There was also evidence of a modest  
43 impact on both blood pressure and lipids, though baseline control of these risk  
44 factors was generally good. Generally little effect on secondary outcomes was found.  
45  
46 Our results suggest that a targeted approach to T2DM management, focussing on  
47 individuals with very poor glycaemic control, may represent a prudent strategy for  
48 future management.  
49  
50  
51  
52  
53  
54

### 55 56 *Strengths and weaknesses of the study*

57  
58  
59  
60

1  
2  
3 The methodology of our systematic review addresses key credibility issues (69, 70).  
4 The research question was sensible, our search of the literature was exhaustive and  
5 our results are outlined clearly for primary and secondary outcomes. The effect of  
6 baseline HbA1c was consistent across studies, biologically plausible and was an a  
7 priori hypothesis (70).  
8  
9  
10

11  
12  
13 We performed meta-regression to explore the heterogeneity, which also confirmed  
14 the increased effectiveness of interventions on those with HbA1c  $\geq$  80 mmol/mol  
15 (9.5%). However, a major limitation is that meta-regression is usually underpowered  
16 to detect anything but very large associations. Meta-regression considers the  
17 interactions between trial level covariates and the treatment effect, but it inherits  
18 difficulties of interpretation attached to non-randomised studies, as it is not possible  
19 to randomise patients to one covariate value or another, so causality cannot be  
20 attached its findings (71). Though we do not believe the subgroup findings occurred  
21 by chance, there remained high heterogeneity and we explored between-study  
22 comparisons rather than within-study comparisons (70). There was some evidence  
23 of publication bias in the DBP analysis, but this was not present for the twenty-two  
24 studies reporting SBP. It should also be noted that the power of Egger's test is low  
25 when the number of studies is small and should only be used if the analysis includes  
26 a range of study sizes.  
27  
28  
29  
30  
31  
32  
33  
34  
35  
36  
37  
38  
39

40 This study will inform researchers regarding the range of interventions that have  
41 been deployed to target patients with poorly controlled T2DM. There is no specific  
42 definition for 'poor control' of T2DM in the literature, but by including all studies  
43 that had patients with a HbA1c  $>$  59 mmol/mol (7.5%), we captured the full range of  
44 poor glycaemic control. Studies examining poor control of HbA1c possess a risk of  
45 regression towards the mean. However, all included studies were RCTs with control  
46 groups, which should have accounted for this. Targeted interventions in poorly  
47 controlled T2DM need to be distinguished from interventions, which are designed to  
48 intensively reduce HbA1c in all patients. Though persons with very poor glycaemic  
49 control are also at risk of the adverse effects of hypoglycaemic agents, targeting this  
50 population is more likely to reach the right balance of reducing harms of  
51  
52  
53  
54  
55  
56  
57  
58  
59  
60

1  
2  
3 overtreatment and maximising potential benefits (18). The relative importance of  
4 targeting glycaemic or cardiovascular risk has been debated in the literature (17).  
5  
6 We did not account for medication use in the studies, but given that all included  
7  
8 studies were RCTs, which would balance out delivery of medications, we think that  
9  
10 differences relating to underlying medication usage relate to how different  
11  
12 interventions types promote the intensification of medications.  
13

### 14 15 *Comparison with other studies* 16

17  
18 The existing literature examining healthcare interventions to improve glycaemic  
19  
20 control has focussed on a range of approaches. There have been systematic reviews  
21  
22 of interventions including QI initiatives, education, self-management support, case-  
23  
24 management, adherence to medication and professional interventions, though as  
25  
26 outlined previously most have not specifically targeted patients with poor glycaemic  
27  
28 control (8, 10, 11).  
29

30  
31 A synthesis of 27 systematic reviews and 347 randomised controlled trials identified  
32  
33 the cost-effectiveness of self-management interventions in T2DM in all patients with  
34  
35 T2DM (72). This overview included studies that targeted all patients with T2DM and  
36  
37 found very good evidence that education improves blood glucose control in patients  
38  
39 with T2DM in the short term (less than 12 months) and that behavioural and  
40  
41 psychological interventions are associated with modest improvements in blood  
42  
43 glucose control (HbA1C) (72, 73). A review of computer-based diabetes self-  
44  
45 management interventions to manage T2DM reported a small beneficial effect on  
46  
47 blood glucose control (MD of -0.2%) (74). Another recent systematic review of 118  
48  
49 self-management interventions found improvements in HbA1c in 62% of studies. The  
50  
51 overall mean effect was to reduce HbA1c by -0.57%, although patients with  
52  
53 persistently elevated HbA1c over 9 had greater improvements (75). In our review,  
54  
55 patient-orientated interventions, such as self-monitoring of blood glucose and self-  
56  
57 management interventions, seemed to be less effective than organisational  
58  
59 interventions.  
60

61  
62 Case management by nurses and other professionals and case management in



1  
2  
3 socially disadvantaged have been shown to be beneficial when targeted at all  
4 patients with T2DM and our review supports this conclusion for poorly-controlled  
5 populations (5, 76-78). Pharmacist-based interventions have been studied, mainly in  
6 outpatient settings or in US primary care, and have been found to be effective and  
7 cost-effective (79, 80). The five pharmacist interventions in our review, targeting  
8 patients with poorly-controlled T2DM, showed mixed results, but overall had  
9 predominantly positive effects on HbA1c.

10  
11  
12 Attention to, and reporting of, intensification of anti-diabetic medications and  
13 patient's adherence to treatment regimens are needed to achieve optimal glycaemic  
14 control (81, 82). Evidence regarding adherence in T2DM is mixed. A previous  
15 systematic review of twenty one studies that included fourteen RCTs to enhance  
16 T2DM treatment adherence in community and hospital settings found that few  
17 studies measured or assessed adherence and that interventions to improve  
18 adherence did not show benefits or harms (83). A review by Farmer et al. found  
19 limited evidence of effect for interventions promoting the monitoring of medication  
20 use and brief messaging to support medication adherence in patients with T2DM,  
21 though the included studies did not specifically target patients with poorly controlled  
22 diabetes (84). Only ten of the 42 included studies in our review looked at adherence  
23 to medications as an outcome and only two of these nine studies had a statistically  
24 significant effect on adherence (49, 62). The baseline level of adherence varied  
25 considerably and studies used different scale ranges.

26  
27  
28 Our review identified only one professional-based interventions in poorly controlled  
29 T2DM, through a physician decision aid (42). Two systematic reviews have examined  
30 the impact of clinical decision support systems (CDSS) on the management of T2DM  
31 in primary care, between them looking at twenty eight trials, with varying results but  
32 none of these CDSS interventions were designed to promote intensification of  
33 prescribing in persons with poor glycaemic control (85, 86).

34  
35  
36  
37  
38  
39  
40  
41  
42  
43  
44  
45  
46  
47  
48  
49  
50  
51  
52  
53  
54  
55  
56  
57  
58  
59  
60  
*Future research*

1  
2  
3 There is a need for further research examining professional-based interventions in  
4 poorly controlled T2DM, such as CDSS, which promote intensification of medications  
5 (81). Studies from jurisdictions outside North America on poorly controlled  
6 populations would also be welcome. An individual patient data meta-analysis would  
7 answer further questions not possible in this review and future research should  
8 attempt to obtain individual-level patient data. It is likely that most successful  
9 interventions have their impact as a result of intensification of medicines and/ or  
10 improving adherence to medicines (81). As adherence was not measured in most of  
11 the studies and intensification poorly documented, it is important that future  
12 interventions report on these findings. Furthermore organisational interventions  
13 could incur significant costs to a health system so cost-effectiveness analyses on  
14 future interventions should be undertaken to ensure the modest improvements in  
15 HbA1c are beneficial for the health systems.  
16  
17  
18  
19  
20  
21  
22  
23  
24  
25  
26  
27

28 In conclusion, clinicians and policy makers, when considering organisation of care for  
29 T2DM should focus their effects on those patients with very poor glycaemic control  
30 ( $\geq 80$  mmol/mol (9.5%)). Prioritising interventions that emphasise structured  
31 organisation of care, which can include intensification and adherence to  
32 medications, also seem more likely to deliver optimal results in terms of glycaemic  
33 control for T2DM patients.  
34  
35  
36  
37  
38  
39  
40

#### 41 **Acknowledgements**

42 Nil  
43  
44  
45

#### 46 **Data sharing statement**

47 All collected data has been supplied as Supplementary Files. Please contact the  
48 corresponding author (MEM) if there are queries regarding this data.  
49  
50  
51  
52

#### 53 **Keywords**

54 BMI- body mass index  
55  
56  
57  
58  
59  
60

1  
2  
3 CBAs- controlled before and after studies

4 CCTs- controlled clinical trials

5 CDSS- clinical decision support system

6 CI- confidence interval

7 DBP- diastolic blood pressure

8 EPOC- Effective Practice and Organisation of Care

9 HCP- health care professional

10 HDL- high density lipoprotein

11 ITS- interrupted time series analyses

12 LDL- high density lipoprotein

13 MD- mean difference

14 PRISMA- Preferred Reporting Items for Systematic Reviews and Meta-Analyses

15 PROM- patient reported outcome measure

16 PROSPERO- international prospective register of systematic reviews

17 QI- quality improvement

18 RCT- randomised controlled trials

19 SBP- systolic blood pressure

20 T2DM- type 2 diabetes mellitus

## References

1. Wild S, Roglic G, Green A, et al. Global prevalence of diabetes: estimates for the year 2000 and projections for 2030. *Diabetes Care*. 2004;27(5):1047-53.
2. Spann SJ, Nutting PA, Galliher JM, et al. Management of type 2 diabetes in the primary care setting: a practice-based research network study. *Ann Fam Med*. 2006;4(1):23-31.
3. Campbell DJ, McGrady M, Prior DL, et al. Most individuals with treated blood pressures above target receive only one or two antihypertensive drug classes. *Intern Med J*. 2013;43(2):137-43.
4. Stratton IM, Adler AI, Neil HA, et al. Association of glycaemia with macrovascular and microvascular complications of type 2 diabetes (UKPDS 35): prospective observational study. *Bmj*. 2000;321(7258):405-12.
5. Stelfox M, Dipnarine K, Stopka C. The chronic care model and diabetes management in US primary care settings: a systematic review. *Prev Chronic Dis*. 2013;10:E26.
6. Mays N. Reducing unwarranted variations in healthcare in the English NHS. *Bmj*. 2011;342:d1849.
7. Simmons RK, Carlsen AH, Griffin SJ, et al. Variation in prescribing of lipid-lowering medication in primary care is associated with incidence of cardiovascular disease and all-cause mortality in people with screen-detected diabetes: findings from the ADDITION-Denmark trial. *Diabet Med*. 2014.
8. Seitz P, Rosemann T, Gensichen J, Huber CA. Interventions in primary care to improve cardiovascular risk factors and glycated haemoglobin (HbA1c) levels in patients with diabetes: a systematic review. *Diabetes Obes Metab*. 2011;13(6):479-89.
9. Renders CM, Valk GD, Griffin SJ, et al. Interventions to improve the management of diabetes in primary care, outpatient, and community settings: a systematic review. *Diabetes Care*. 2001;24(10):1821-33.
10. Seidu S, Walker NS, Bodicoat DH, et al. A systematic review of interventions targeting primary care or community based professionals on cardio-metabolic risk factor control in people with diabetes. *Diabetes Res Clin Pract*. 2016;113:1-13.

11. Tricco AC, Ivers NM, Grimshaw JM, et al. Effectiveness of quality improvement strategies on the management of diabetes: a systematic review and meta-analysis. *Lancet*. 2012;379(9833):2252-61.
12. Patel A, MacMahon S, Chalmers J, et al. Intensive blood glucose control and vascular outcomes in patients with type 2 diabetes. *N Engl J Med*. 2008;358(24):2560-72.
13. Gerstein HC, Miller ME, Byington RP, et al. Effects of intensive glucose lowering in type 2 diabetes. *N Engl J Med*. 2008;358(24):2545-59.
14. Duckworth W, Abraira C, Moritz T, et al. Glucose control and vascular complications in veterans with type 2 diabetes. *N Engl J Med*. 2009;360(2):129-39.
15. Turnbull FM, Abraira C, Anderson RJ, et al. Intensive glucose control and macrovascular outcomes in type 2 diabetes. *Diabetologia*. 2009;52(11):2288-98.
16. Skyler JS, Bergenstal R, Bonow RO, et al. Intensive glycemic control and the prevention of cardiovascular events: implications of the ACCORD, ADVANCE, and VA Diabetes Trials: a position statement of the American Diabetes Association and a Scientific Statement of the American College of Cardiology Foundation and the American Heart Association. *J Am Coll Cardiol*. 2009;53(3):298-304.
17. Hayward RA, Reaven PD, Wiitala WL, et al. Follow-up of glycemic control and cardiovascular outcomes in type 2 diabetes. *N Engl J Med*. 2015;372(23):2197-206.
18. Hayward RA. Excessive testing of adults with type 2 diabetes. *Bmj*. 2015;351:h6549.
19. Mossello E. Targeting Vascular Risk Factors in Older Adults: From Polypill to Personalized Prevention. *JAMA Intern Med*. 2015;175(12):1949-50.
20. Murphy M, Galvin R, Fahey T, Smith S. Effectiveness of interventions in primary care to improve glycosylated haemoglobin (HbA1c) and cardiovascular risk factor levels in patients with poorly-controlled type 2 diabetes mellitus: a systematic review. PROSPERO. 2014;CRD42014014442.
21. Effective Practice and Organisation of Care. EPOC Intervention types. Norwegian Knowledge Centre for the Health Services. 2015;Accessed on 13th April 2016: [https://epoc.cochrane.org/sites/epoc.cochrane.org/files/uploads/EPOC\\_Taxonomy\\_of\\_Interventions\\_2002.pdf](https://epoc.cochrane.org/sites/epoc.cochrane.org/files/uploads/EPOC_Taxonomy_of_Interventions_2002.pdf).

- 1
- 2
- 3 22. Keogh KM, Smith SM, White P, et al. Psychological family intervention for
- 4 poorly controlled type 2 diabetes. *Am J Manag Care*. 2011;17(2):105-13.
- 5
- 6 23. Krein SL, Klamerus ML, Vijan S, et al. Case management for patients with
- 7 poorly controlled diabetes: a randomized trial. *Am J Med*. 2004;116(11):732-9.
- 8
- 9
- 10 24. McMahon GT, Gomes HE, Hohne SH, et al. Web-based care management in
- 11 patients with poorly controlled diabetes. *Diabetes Care*. 2005;28(7):1624-9.
- 12
- 13 25. Vanselow NA, Donaldson MS, Yordy KD. A new definition of primary care.
- 14 *Jama*. 1995;273(3):192.
- 15
- 16
- 17 26. Effective Practice and Organisation of Care (EPOC). Summary assessments of
- 18 the risk of bias. EPOC Resources for review authors Oslo: Norwegian Knowledge
- 19 Centre for the Health Services.2013 [Available from: Accessed on 13th April 2016
- 20 [http://epoc.cochrane.org/sites/epoc.cochrane.org/files/uploads/16\\_Summary](http://epoc.cochrane.org/sites/epoc.cochrane.org/files/uploads/16_Summary_assessments_of_the_risk_of_bias_2013_08_12_2.pdf)
- 21 [assessments\\_of\\_the\\_risk\\_of\\_bias\\_2013\\_08\\_12\\_2.pdf](http://epoc.cochrane.org/sites/epoc.cochrane.org/files/uploads/16_Summary_assessments_of_the_risk_of_bias_2013_08_12_2.pdf).
- 22
- 23
- 24
- 25
- 26 27. StataCorp. Stata Statistical Software: Release 13. College Station, TX:
- 27 StataCorp LP; 2013.
- 28
- 29 28. Higgins J, Thompson S. Quantifying heterogeneity in a meta-analysis. *Stat*
- 30 *Med*. 2002;21:1539-58.
- 31
- 32 29. Thompson SG, Higgins JP. How should meta-regression analyses be
- 33 undertaken and interpreted? *Stat Med*. 2002;21(11):1559-73.
- 34
- 35 30. Thom DH, Ghorob A, Hessler D, et al. Impact of peer health coaching on
- 36 glycemic control in low-income patients with diabetes: a randomized controlled trial.
- 37 *Ann Fam Med*. 2013;11(2):137-44.
- 38
- 39 31. Taylor CB, Miller NH, Reilly KR, et al. Evaluation of a nurse-care management
- 40 system to improve outcomes in patients with complicated diabetes. *Diabetes Care*.
- 41 2003;26(4):1058-63.
- 42
- 43 32. Tang PC, Overhage JM, Chan AS, et al. Online disease management of
- 44 diabetes: Engaging and motivating patients online with enhanced resources-diabetes
- 45 (EMPOWER-D), a randomized controlled trial. *J Am Med Inform Assoc*.
- 46 2013;20(3):526-34.
- 47
- 48 33. Sen AP, Sewell TB, Riley EB, et al. Financial incentives for home-based health
- 49 monitoring: a randomized controlled trial. *J Gen Intern Med*. 2014;29(5):770-7.
- 50
- 51
- 52
- 53
- 54
- 55
- 56
- 57
- 58
- 59
- 60

- 1  
2  
3 34. Schillinger D, Handley M, Wang F, Hammer H. Effects of Self-Management  
4 Support on Structure, Process, and Outcomes Among Vulnerable Patients With  
5 Diabetes A three-arm practical clinical trial. *Diabetes Care*. 2009;32(4):559-66.  
6  
7
- 8 35. Rothman RL, Malone R, Bryant B, et al. A randomized trial of a primary care-  
9 based disease management program to improve cardiovascular risk factors and  
10 glycated hemoglobin levels in patients with diabetes. *Am J Med*. 2005;118(3):276-84.  
11
- 12 36. Quinn CC, Shardell MD, Terrin ML, et al. Cluster-randomized trial of a mobile  
13 phone personalized behavioral intervention for blood glucose control. *Diabetes Care*.  
14 2011;34(9):1934-42.  
15  
16
- 17 37. Polonsky WH, Fisher L, Schikman CH, et al. A structured self-monitoring of  
18 blood glucose approach in type 2 diabetes encourages more frequent, intensive, and  
19 effective physician interventions: results from the STeP study. *Diabetes Technol*  
20 *Ther*. 2011;13(8):797-802.  
21  
22
- 23 38. Philis-Tsimikas A, Fortmann A, Lleba-Ocana L, et al. Peer-Led Diabetes  
24 Education Programs in High-Risk Mexican Americans Improve Glycemic Control  
25 Compared With Standard Approaches A Project Dulce promotora randomized trial.  
26 *Diabetes Care*. 2011;34(9):1926-31.  
27  
28
- 29 39. Palmas W, Findley SE, Mejia M, et al. Results of the northern Manhattan  
30 diabetes community outreach project: a randomized trial studying a community  
31 health worker intervention to improve diabetes care in Hispanic adults. *Diabetes*  
32 *Care*. 2014;37(4):963-9.  
33  
34
- 35 40. Odegard PS, Goo A, Hummel J, et al. Caring for poorly controlled diabetes  
36 mellitus: a randomized pharmacist intervention. *Ann Pharmacother*. 2005;39(3):433-  
37 40.  
38  
39
- 40 41. Mons U, Raum E, Kramer HU, et al. Effectiveness of a Supportive Telephone  
41 Counseling Intervention in Type 2 Diabetes Patients: Randomized Controlled Study.  
42 *Plos One*. 2013;8(10).  
43  
44
- 45 42. Mathers N, Ng CJ, Campbell MJ, et al. Clinical effectiveness of a patient  
46 decision aid to improve decision quality and glycaemic control in people with  
47 diabetes making treatment choices: a cluster randomised controlled trial (PANDAs)  
48 in general practice. *BMJ Open*. 2012;2(6).  
49  
50  
51  
52  
53  
54  
55  
56  
57  
58  
59  
60

- 1  
2  
3 43. Maislos M, Weisman D. Multidisciplinary approach to patients with poorly  
4 controlled type 2 diabetes mellitus: a prospective, randomized study. *Acta Diabetol.*  
5 2004;41(2):44-8.  
6  
7  
8 44. Long JA, Jahnle EC, Richardson DM, et al. Peer mentoring and financial  
9 incentives to improve glucose control in African American veterans: a randomized  
10 trial. *Ann Intern Med.* 2012;156(6):416-24.  
11  
12 45. Kim MT, Han HR, Song HJ, et al. A community-based, culturally tailored  
13 behavioral intervention for Korean Americans with type 2 diabetes. *Diabetes Educ.*  
14 2009;35(6):986-94.  
15  
16 46. Jovanovic L, Cali Medi-Cal type2 Diabet Stu G. Closing the gap: Effect of  
17 diabetes case management on glycemic control among low-income ethnic minority  
18 populations - The California Medi-Cal type 2 diabetes study. *Diabetes Care.*  
19 2004;27(1):95-103.  
20  
21 47. Jameson JP, Baty PJ. Pharmacist collaborative management of poorly  
22 controlled diabetes mellitus: a randomized controlled trial. *Am J Manag Care.*  
23 2010;16(4):250-5.  
24  
25 48. Jacobs M, Sherry PS, Taylor LM, et al. Pharmacist Assisted Medication  
26 Program Enhancing the Regulation of Diabetes (PAMPERED) study. *J Am Pharm*  
27 *Assoc (2003).* 2012;52(5):613-21.  
28  
29 49. Heisler M, Vijan S, Makki F, Piette JD. Diabetes control with reciprocal peer  
30 support versus nurse care management: a randomized trial. *Ann Intern Med.*  
31 2010;153(8):507-15.  
32  
33 50. Guerci B, Drouin P, Grange V, et al. Self-monitoring of blood glucose  
34 significantly improves metabolic control in patients with type 2 diabetes mellitus: the  
35 Auto-Surveillance Intervention Active (ASIA) study. *Diabetes Metab.* 2003;29(6):587-  
36 94.  
37  
38 51. Frosch DL, Uy V, Ochoa S, Mangione CM. Evaluation of a behavior support  
39 intervention for patients with poorly controlled diabetes. *Arch Intern Med.*  
40 2011;171(22):2011-7.  
41  
42 52. Forjuoh SN, Bolin JN, Huber Jr JC, et al. Behavioral and technological  
43 interventions targeting glycemic control in a racially/ethnically diverse population: A  
44 randomized controlled trial. *BMC Public Health.* 2014;14(1).  
45  
46  
47  
48  
49  
50  
51  
52  
53  
54  
55  
56  
57  
58  
59  
60



- 1  
2  
3 53. Farmer A, Hardeman W, Hughes D, et al. An explanatory randomised  
4 controlled trial of a nurse-led, consultation-based intervention to support patients  
5 with adherence to taking glucose lowering medication for type 2 diabetes. *Bmc*  
6 *Family Practice*. 2012;13.  
7  
8  
9  
10 54. Edelman D, Fredrickson SK, Melnyk SD, et al. Medical clinics versus usual care  
11 for patients with both diabetes and hypertension: a randomized trial. *Ann Intern*  
12 *Med*. 2010;152(11):689-96.  
13  
14  
15 55. DePue JD, Dunsiger S, Seiden AD, et al. Nurse-Community Health Worker  
16 Team Improves Diabetes Care in American Samoa Results of a randomized  
17 controlled trial. *Diabetes Care*. 2013;36(7):1947-53.  
18  
19  
20  
21 56. Dale J, Caramlau I, Sturt J, et al. Telephone peer-delivered intervention for  
22 diabetes motivation and support: The telecare exploratory RCT. *Patient Education*  
23 *and Counseling*. 2009;75(1):91-8.  
24  
25  
26 57. Choe HM, Mitrovich S, Dubay D, et al. Proactive case management of high-  
27 risk patients with type 2 diabetes mellitus by a clinical pharmacist: a randomized  
28 controlled trial. *Am J Manag Care*. 2005;11(4):253-60.  
29  
30  
31 58. Blackberry ID, Furler JS, Best JD, et al. Effectiveness of general practice based,  
32 practice nurse led telephone coaching on glycaemic control of type 2 diabetes: the  
33 Patient Engagement and Coaching for Health (PEACH) pragmatic cluster randomised  
34 controlled trial. *Bmj*. 2013;347:f5272.  
35  
36  
37 59. Crowley MJ, Edelman D, McAndrew AT, et al. Effectiveness of a scalable  
38 telemedicine intervention for veterans with persistent poor diabetes control.  
39 *Diabetes*. 2015;64:A80.  
40  
41  
42 60. Edelman D, Dolor RJ, Coffman CJ, et al. Nurse-Led Behavioral Management of  
43 Diabetes and Hypertension in Community Practices: A Randomized Trial. *J Gen Intern*  
44 *Med*. 2015;30(5):626-33.  
45  
46  
47 61. Capozza K, Woolsey S, Georgsson M, et al. Going mobile with diabetes  
48 support: a randomized study of a text message-based personalized behavioral  
49 intervention for type 2 diabetes self-care. *Diabetes spectrum* : a publication of the  
50 American Diabetes Association. 2015;28(2):83-91.  
51  
52  
53  
54  
55  
56  
57  
58  
59  
60

- 1  
2  
3 62. McDermott RA, Schmidt B, Preece C, et al. Community health workers  
4 improve diabetes care in remote Australian Indigenous communities: results of a  
5 pragmatic cluster randomized controlled trial. *BMC Health Serv Res.* 2015;15.  
6  
7  
8 63. O'Connor PJ, Schmittiel JA, Pathak RD, et al. Randomized trial of telephone  
9 outreach to improve medication adherence and metabolic control in adults with  
10 diabetes. *Diabetes Care.* 2014;37(12):3317-24.  
11  
12  
13 64. Sugiyama T, Steers WN, Wenger NS, et al. Effect of a community-based  
14 diabetes self-management empowerment program on mental health-related quality  
15 of life: a causal mediation analysis from a randomized controlled. *BMC Health Serv*  
16 *Res.* 2015;15.  
17  
18  
19 65. Anzaldo-Campos MC, Contreras S, Vargas-Ojeda A, et al. Dulce Wireless  
20 Tijuana: A Randomized Control Trial Evaluating the Impact of Project Dulce and  
21 Short-Term Mobile Technology on Glycemic Control in a Family Medicine Clinic in  
22 Northern Mexico. *Diabetes Technol Ther.* 2016;18(4):240-51.  
23  
24  
25 66. Basudev N, Crosby-Nwaobi R, Thomas S, et al. A prospective randomized  
26 controlled study of a virtual clinic integrating primary and specialist care for patients  
27 with Type 2 diabetes mellitus. *Diabetic Medicine.* 2016;33(6):768-76.  
28  
29  
30 67. Protheroe J, Rathod T, Bartlam B, et al. The Feasibility of Health Trainer  
31 Improved Patient Self-Management in Patients with Low Health Literacy and Poorly  
32 Controlled Diabetes: A Pilot Randomised Controlled Trial. *Journal of Diabetes*  
33 *Research.* 2016;2016.  
34  
35  
36 68. Wild SH, Hanley J, Lewis SC, et al. Supported Telemonitoring and Glycemic  
37 Control in People with Type 2 Diabetes: The Telescot Diabetes Pragmatic Multicenter  
38 Randomized Controlled Trial. *Plos Medicine.* 2016;13(7).  
39  
40  
41 69. Murad MH, Montori VM, Ioannidis JP, et al. How to read a systematic review  
42 and meta-analysis and apply the results to patient care: users' guides to the medical  
43 literature. *Jama.* 2014;312(2):171-9.  
44  
45  
46 70. Sun X, Ioannidis JP, Agoritsas T, et al. How to use a subgroup analysis: users'  
47 guide to the medical literature. *Jama.* 2014;311(4):405-11.  
48  
49  
50 71. Dias S, Sutton AJ, Welton NJ, Ades A. Heterogeneity: subgroups, meta-  
51 regression, bias and bias-adjustment. NICE Decision Support Unit Technical Support  
52 Document [Internet]. 2012.  
53  
54  
55  
56  
57  
58  
59  
60

- 1  
2  
3 72. Health and Information and Quality Authority. Health technology assessment  
4 of chronic disease self- management support interventions. 2015.  
5  
6 73. Ismail K, Winkley K, Rabe-Hesketh S. Systematic review and meta-analysis of  
7 randomised controlled trials of psychological interventions to improve glycaemic  
8 control in patients with type 2 diabetes. *Lancet*. 2004;363(9421):1589-97.  
9  
10 74. Pal K, Eastwood SV, Michie S, et al. Computer-based interventions to improve  
11 self-management in adults with type 2 diabetes: a systematic review and meta-  
12 analysis. *Diabetes Care*. 2014;37(6):1759-66.  
13  
14 75. Chrvala CA, Sherr D, Lipman RD. Diabetes self-management education for  
15 adults with type 2 diabetes mellitus: A systematic review of the effect on glycemic  
16 control. *Patient Educ Couns*. 2015.  
17  
18 76. Norris SL, Nichols PJ, Caspersen CJ, et al. The effectiveness of disease and  
19 case management for people with diabetes. A systematic review. *Am J Prev Med*.  
20 2002;22(4 Suppl):15-38.  
21  
22 77. Glazier RH, Bajcar J, Kennie NR, Willson K. A systematic review of  
23 interventions to improve diabetes care in socially disadvantaged populations.  
24 *Diabetes Care*. 2006;29(7):1675-88.  
25  
26 78. Saxena S, Misra T, Car J, et al. Systematic review of primary healthcare  
27 interventions to improve diabetes outcomes in minority ethnic groups. *J Ambul Care*  
28 *Manage*. 2007;30(3):218-30.  
29  
30 79. Wang Y, Yeo QQ, Ko Y. Economic evaluations of pharmacist-managed services  
31 in people with diabetes mellitus: a systematic review. *Diabet Med*. 2015.  
32  
33 80. Santschi V, Chiolero A, Paradis G, et al. Pharmacist interventions to improve  
34 cardiovascular disease risk factors in diabetes: a systematic review and meta-analysis  
35 of randomized controlled trials. *Diabetes Care*. 2012;35(12):2706-17.  
36  
37 81. Krass I, Schieback P, Dhippayom T. Adherence to diabetes medication: a  
38 systematic review. *Diabet Med*. 2015;32(6):725-37.  
39  
40 82. Cramer JA. A systematic review of adherence with medications for diabetes.  
41 *Diabetes Care*. 2004;27(5):1218-24.  
42  
43 83. Vermeire E, Wens J, Van Royen P, et al. Interventions for improving  
44 adherence to treatment recommendations in people with type 2 diabetes mellitus.  
45 *Cochrane Database Syst Rev*. 2005(2):Cd003638.  
46  
47  
48  
49  
50  
51  
52  
53  
54  
55  
56  
57  
58  
59  
60

1  
2  
3 84. Farmer AJ, McSharry J, Rowbotham S, et al. Effects of interventions  
4 promoting monitoring of medication use and brief messaging on medication  
5 adherence for people with Type 2 diabetes: a systematic review of randomized trials.  
6 Diabet Med. 2015.  
7  
8  
9

10 85. Cleveringa FG, Gorter KJ, van den Donk M, et al. Computerized decision  
11 support systems in primary care for type 2 diabetes patients only improve patients'  
12 outcomes when combined with feedback on performance and case management: a  
13 systematic review. Diabetes Technol Ther. 2013;15(2):180-92.  
14  
15  
16

17 86. Jeffery R, Iserman E, Haynes RB. Can computerized clinical decision support  
18 systems improve diabetes management? A systematic review and meta-analysis.  
19 Diabet Med. 2012;30(6):739-45.  
20  
21  
22  
23  
24  
25  
26  
27  
28  
29  
30  
31  
32  
33  
34  
35  
36  
37  
38  
39  
40  
41  
42  
43  
44  
45  
46  
47  
48  
49  
50  
51  
52  
53  
54  
55  
56  
57  
58  
59  
60

Figure 1: PRISMA Flow Sheet



Figure 2a: Effects of interventions on HbA1c, with intervention-type subgroups



Figure 2a Effects of interventions on HbA1c, with intervention-type subgroups

209x278mm (300 x 300 DPI)

Figure 2b: Effects of interventions on HbA1c, with baseline-HbA1c subgroups

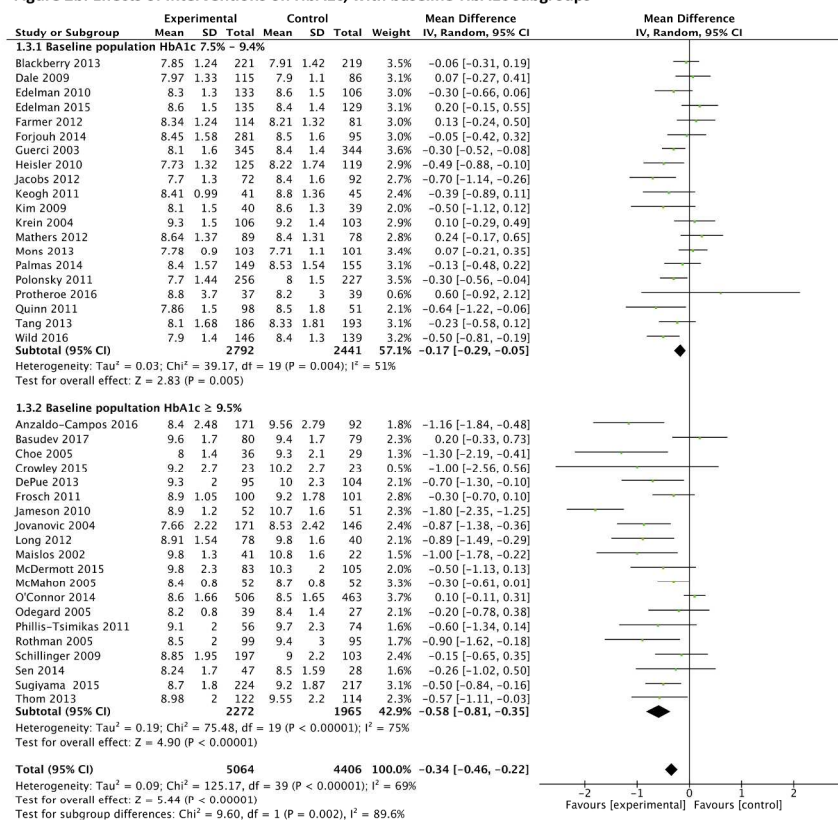

Figure 2b Effects of interventions on HbA1c, with baseline HbA1c subgroups

209x278mm (300 x 300 DPI)

Figure 2c: Effects of interventions on HbA1c, with study-duration subgroups

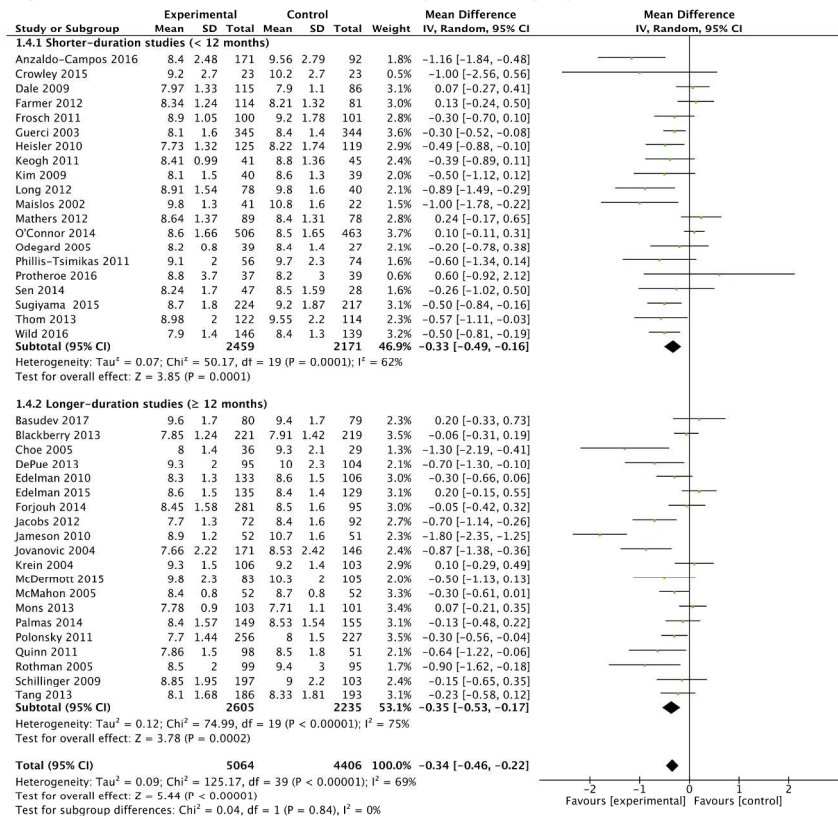

Figure 2c Effects of interventions on HbA1c, with baseline study duration subgroups

209x278mm (300 x 300 DPI)



Figure 2d: Effects of interventions on HbA1c, with study-quality subgroups

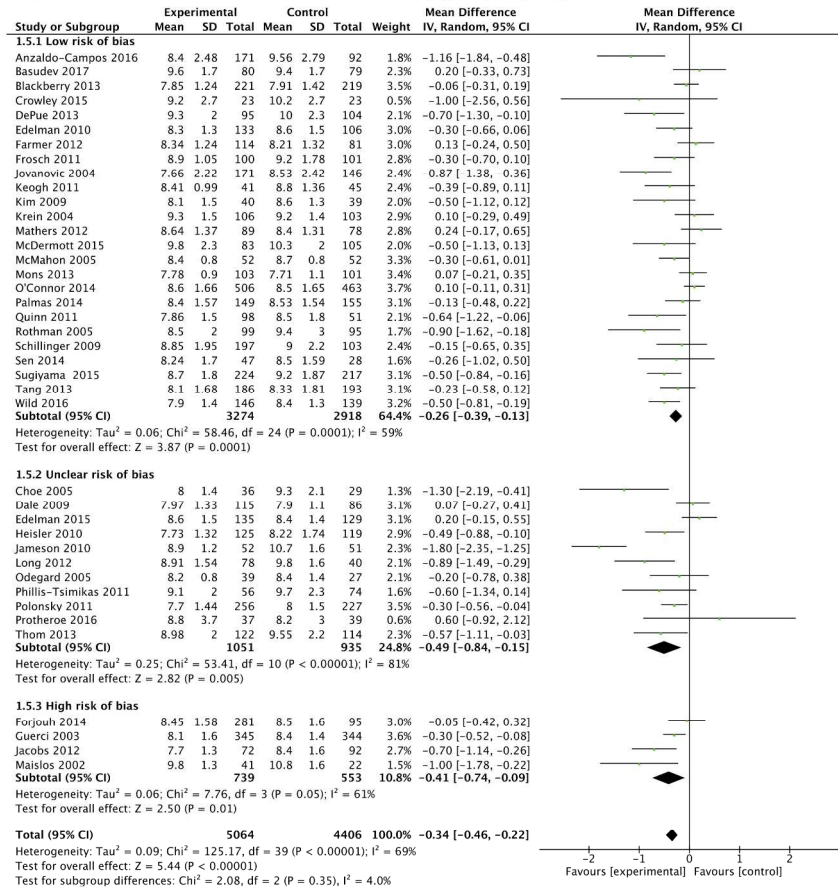

Figure 2d Effects of interventions on HbA1c, with baseline study quality subgroups

209x278mm (300 x 300 DPI)



1  
2  
3  
4 practitioner's[Title/Abstract] OR general practitioners[Title/Abstract] OR general  
5  
6 practitioner[Title/Abstract] OR general practicionners[Title/Abstract] OR general  
7  
8 practive[Title/Abstract]) OR (family practice[Title/Abstract] OR family  
9  
10 practices[Title/Abstract] OR family practioner[Title/Abstract] OR family  
11  
12 practise[Title/Abstract] OR family practitioner[Title/Abstract] OR family  
13  
14 practitioners[Title/Abstract]) OR outpatient?[Title/Abstract] OR  
15  
16 clinic?[Title/Abstract] OR ambulatory[Title/Abstract] OR health  
17  
18 centre?[Title/Abstract] OR health centre?[Title/Abstract] OR office[Title/Abstract]  
19  
20 OR veterans[Title/Abstract] OR pharmacist[Title/Abstract] OR nurse[Title/Abstract]  
21  
22 OR doctor[Title/Abstract] OR psychologist[Title/Abstract] OR health care  
23  
24 provider[Title/Abstract] OR case manager[Title/Abstract] OR "case  
25  
26 management"[Title/Abstract] OR "care management"[Title/Abstract]) AND  
27  
28 ("1990/01/01"[PDAT] : "2016/12/31"[PDAT])) AND ((Lipid[Title/Abstract] OR  
29  
30 cholesterol[Title/Abstract] OR blood pressure[Title/Abstract] OR  
31  
32 hypertension[Title/Abstract] OR cardiovascular risk[Title/Abstract] OR  
33  
34 glycaemic[Title/Abstract] OR glycemic[Title/Abstract] OR HbA1c[Title/Abstract] OR  
35  
36 A1c[Title/Abstract] OR (HbA[Title/Abstract] AND 1c[All Fields]) AND Title/Abstract[All  
37  
38 Fields] OR haemoglobin[Title/Abstract] OR hemoglobin[Title/Abstract]) AND  
39  
40 ("1990/01/01"[PDAT] : "2016/12/31"[PDAT])) AND ((Diabetes[Title/Abstract] OR  
41  
42 T2D\$[Title/Abstract] OR NIDDM[Title/Abstract] OR MODY[Title/Abstract] OR Non-  
43  
44 insulin dependent[Title/Abstract] OR Insulin[Title/Abstract] OR IDDM[Title/Abstract]  
45  
46 OR Poorly-controlled[Title/Abstract]) AND ("1990/01/01"[PDAT] :  
47  
48 "2016/12/31"[PDAT])) AND ("1990/01/01"[PDAT] : "2016/12/31"[PDAT])  
49  
50  
51  
52  
53  
54  
55  
56  
57  
58  
59  
60

1  
2  
3 **WoS search**  
4

5  
6  
7 TS = (Diabetes OR T2D\$ OR NIDDM OR MODY OR Non-insulin dependent OR Insulin  
8  
9 OR IDDM OR Poorly-controlled )

10  
11  
12  
13 AND

14  
15  
16 TS = (Lipid OR cholesterol OR blood pressure OR hypertension OR cardiovascular risk  
17  
18 OR glycaemic OR glycemic OR HbA1c OR A1c OR (HbA AND (1c)) OR haemoglobin OR  
19  
20 hemoglobin)  
21

22  
23  
24 AND

25  
26  
27 TS = (primary care or primary health or family physician\* or general practi\* or family  
28  
29 practi\* or outpatient? or clinic? or ambulatory or health centre? or health centre? or  
30  
31 office)  
32

33  
34  
35  
36  
37 TI = (Diabetes OR T2D\$ OR NIDDM OR MODY OR Non-insulin dependent OR Insulin  
38  
39 OR IDDM OR Poorly-controlled ) AND TS = (Lipid OR cholesterol OR blood pressure  
40  
41 OR hypertension OR cardiovascular risk OR glycaemic OR glycemic OR HbA1c OR A1c  
42  
43 OR (HbA AND (1c)) OR haemoglobin OR hemoglobin) AND TS = (primary care or  
44  
45 primary health or family physician\* or general practi\* or family practi\* or  
46  
47 outpatient? or clinic? or ambulatory or health centre? or health centre? or office)  
48

49  
50 *Indexes=SCI-EXPANDED, SSCI, CPCI-S, CPCI-SSH Timespan=1990-2016*  
51  
52  
53  
54  
55  
56  
57  
58  
59  
60

**SCOPUS**

lipid OR cholesterol OR blood pressure OR hypertension OR cardiovascular risk

OR glycaemic OR glycemic OR hba1c OR a1c OR ( hba AND ( 1c ) ) OR haemogl  
obin OR hemoglobin AND diabetes OR t2d\$ OR niddm OR mody OR non-  
insulin dependent OR insulin OR iddm OR poorly-  
controlled AND primary care OR primary health OR family physician\* OR gener  
al practi\* OR family practi\* OR outpatient? OR clinic? OR ambulatory OR healt  
h centre? OR health centre? OR office AND ( EXCLUDE ( SUBJAREA , "DENT" ) O  
R EXCLUDE ( SUBJAREA , "ENVI" ) OR EXCLUDE ( SUBJAREA , "DENT" ) OR EXCLUD  
E ( SUBJAREA , "ENVI" ) OR EXCLUDE ( SUBJAREA , "ARTS" ) OR EXCLUDE ( SUBJAR  
EA , "CHEM" ) OR EXCLUDE ( SUBJAREA , "ENGI" ) OR EXCLUDE ( SUBJAREA , "BUS  
I" ) OR EXCLUDE ( SUBJAREA , "ECON" ) OR EXCLUDE ( SUBJAREA , "VETE" ) OR E  
XCLUDE ( SUBJAREA , "MATE" ) OR EXCLUDE ( SUBJAREA , "COMP" ) OR EXCLUDE  
( SUBJAREA , "MATH" ) OR EXCLUDE ( SUBJAREA , "EART" ) OR EXCLUDE ( SUBJAR  
EA , "PHYS" ) )

1990- 2016 Title abstract

**Embase**

(primary care OR primary health OR family physician\* OR general practi\* OR family  
practi\* OR outpatient? OR clinic? OR ambulatory OR health centre? OR health  
centre? OR office OR veterans OR pharmacist OR nurse OR doctor OR psychologist  
OR OR health care provider OR case manager OR case management OR care  
management):ab,ti

AND

(Lipid OR cholesterol OR blood pressure OR hypertension OR cardiovascular risk OR  
glycaemic OR glycemic OR HbA1c OR A1c OR (HbA AND (1c)) OR haemoglobin OR  
haemoglobin):ab,ti

AND

(Diabetes OR T2D\$ OR NIDDM OR MODY OR Non-insulin dependent OR Insulin OR  
IDDM OR Poorly-controlled):ab,ti

1  
2  
3 **Cochrane Library = 74**  
4  
5  
6  
7

8  
9 (Diabetes OR T2D\$ OR NIDDM OR MODY OR Non-insulin dependent OR Insulin OR  
10  
11 IDDM OR Poorly-controlled)

12  
13  
14  
15 AND

16  
17  
18 (Lipid OR cholesterol OR blood pressure OR hypertension OR cardiovascular risk OR  
19  
20 glycaemic OR glycemic OR HbA1c OR A1c OR (HbA AND (1c)) OR haemoglobin OR  
21  
22 hemoglobin)  
23

24  
25  
26  
27 AND

28  
29 (primary care or primary health or family physician\* or general practi\* or family  
30  
31 practi\* or outpatient? or clinic? or ambulatory or health centre? or health centre? or  
32  
33 office or veterans OR pharmacist OR nurse OR doctor OR psychologist OR health care  
34  
35 provider OR case manager OR case management OR care management)  
36  
37  
38

39  
40  
41  
42 (Diabetes OR T2D\$ OR NIDDM OR MODY OR Non-insulin dependent OR Insulin OR  
43  
44 IDDM OR Poorly-controlled) AND ( Lipid OR cholesterol OR blood pressure OR  
45  
46 hypertension OR cardiovascular risk OR glycaemic OR glycemic OR HbA1c OR A1c OR  
47  
48 (HbA AND (1c)) OR haemoglobin) AND (primary care or primary health or family  
49  
50 physician\* or general practi\* or family practi\* or outpatient? or clinic? or  
51  
52 ambulatory or health centre? or health centre? or office or veterans OR pharmacist  
53  
54 OR nurse OR doctor OR psychologist OR health care provider OR case manager OR  
55  
56 case management OR care management) in Title, Abstract, Keywords in Cochrane  
57  
58 Reviews  
59  
60

| <b>Appendix 2: Cochrane Effective Practice And Organisation of Care Review Group taxonomy of interventions:</b> |                                                                                                                                                                                                                                                                                       |
|-----------------------------------------------------------------------------------------------------------------|---------------------------------------------------------------------------------------------------------------------------------------------------------------------------------------------------------------------------------------------------------------------------------------|
| <b>Professional interventions</b>                                                                               | For example; distribution of educational materials to healthcare professional, or educational meetings, or audit and feedback.                                                                                                                                                        |
| <b>Organisational interventions</b>                                                                             | For example; Revision of professional role (e.g. community pharmacist providing case management for patient with diabetes) or skill mix changes (changes in numbers, types or qualifications of staff). Included telemedicine interventions with predominant organisational elements. |
| <b>Patient-orientated interventions</b>                                                                         | For example; patient education, peer support or support for self management. Including telephone and telemedicine interventions with predominant patients elements (with focus on self-management)                                                                                    |
| <b>Financial interventions</b>                                                                                  | For example; Fee-for-service for provider or a penalty for the patient.                                                                                                                                                                                                               |
| <b>Regulatory interventions</b>                                                                                 | For example; changes to local or national regulations designed to alter care delivery to improve outcomes.                                                                                                                                                                            |



## Appendix 3: Detailed description of study interventions

| N  | Study                                    | Brief intervention description                                                                                                                                                                                                                                                                                                            | Intervention description                                                                                                                                                                                                                                                                                                                                                                                                                                                                                                                                                                                                                                                                                                                                                                                                                                                                                                                                                                                                                                                                                                                                                                                                                                                                                                                                                                                                                                                                                                                                                                                                                                                                                                                                                |
|----|------------------------------------------|-------------------------------------------------------------------------------------------------------------------------------------------------------------------------------------------------------------------------------------------------------------------------------------------------------------------------------------------|-------------------------------------------------------------------------------------------------------------------------------------------------------------------------------------------------------------------------------------------------------------------------------------------------------------------------------------------------------------------------------------------------------------------------------------------------------------------------------------------------------------------------------------------------------------------------------------------------------------------------------------------------------------------------------------------------------------------------------------------------------------------------------------------------------------------------------------------------------------------------------------------------------------------------------------------------------------------------------------------------------------------------------------------------------------------------------------------------------------------------------------------------------------------------------------------------------------------------------------------------------------------------------------------------------------------------------------------------------------------------------------------------------------------------------------------------------------------------------------------------------------------------------------------------------------------------------------------------------------------------------------------------------------------------------------------------------------------------------------------------------------------------|
| N. | Author<br>Year<br>Country                | Brief Intervention description                                                                                                                                                                                                                                                                                                            | Intervention description (detailed)<br><br>Length intervention<br><br>Predominant Intervention type<br><br>Comparison                                                                                                                                                                                                                                                                                                                                                                                                                                                                                                                                                                                                                                                                                                                                                                                                                                                                                                                                                                                                                                                                                                                                                                                                                                                                                                                                                                                                                                                                                                                                                                                                                                                   |
| 1  | Anzaldo-Campos<br><br>2016<br><br>Mexico | Two interventions:<br><br>Nurse care support and peer-led diabetes self-management education intervention (called Project Dulce).<br><br>Nurse care support and peer-led diabetes self-management education intervention. A technology-enhanced intervention, using cell phone uploads of glucose and BP levels and text message support. | Two interventions, called the Project Dulce Model:<br><br>1. Nurse care management through a combination of a multidisciplinary team of clinicians and nurse, as well as trained peer-led diabetes self-management education (this collectively is the called Project Dulce (PD) model. Clinicians underwent 16 hours of training and monthly ongoing education. The nurses, trained in diabetes care, provided personalized education to patients, in accordance with national guidelines. They also liaised with the peer educators, who either had diabetes themselves or lived or worked with people with diabetes. They underwent a training programme, modified for a Mexican population. Addressing fears pertaining to insulin use and addressing self-management was a focus of their educational sessions.<br><br>2. The PD intervention above, was combined with a technology-enhanced intervention, using cell phone uploads of glucose and BP levels and text message support (called the PD-TE intervention). Participants received free glucose monitors and training, they were asked to check their sugars twice a day for one month, then two days per week thereafter. The glucose data was uploaded to a central system and medical staff monitored these readings. Text messages, surveys, videos and brochures were also sent out to participants.<br><br>Length: The first intervention (PD) comprised eight weekly sessions with peer educators for two months, then monthly sessions thereafter up to 10 months in total. For the PD-TE group, text messages, surveys, videos and brochures were also sent throughout the 10 months.<br><br>Predominant EPOC intervention type: Patient-centred<br><br>Comparison: Usual general practice care |

|    |   |                                              |                                                                                                                                                                                                                                                                                                                                                                                                                                                                                                                                                                                                                                                                     |
|----|---|----------------------------------------------|---------------------------------------------------------------------------------------------------------------------------------------------------------------------------------------------------------------------------------------------------------------------------------------------------------------------------------------------------------------------------------------------------------------------------------------------------------------------------------------------------------------------------------------------------------------------------------------------------------------------------------------------------------------------|
| 1  |   |                                              |                                                                                                                                                                                                                                                                                                                                                                                                                                                                                                                                                                                                                                                                     |
| 2  |   |                                              |                                                                                                                                                                                                                                                                                                                                                                                                                                                                                                                                                                                                                                                                     |
| 3  |   |                                              |                                                                                                                                                                                                                                                                                                                                                                                                                                                                                                                                                                                                                                                                     |
| 4  |   |                                              |                                                                                                                                                                                                                                                                                                                                                                                                                                                                                                                                                                                                                                                                     |
| 5  |   |                                              |                                                                                                                                                                                                                                                                                                                                                                                                                                                                                                                                                                                                                                                                     |
| 6  |   |                                              |                                                                                                                                                                                                                                                                                                                                                                                                                                                                                                                                                                                                                                                                     |
| 7  | 2 | Basudev<br>2016<br>UK                        | Virtual clinic integrating primary and specialist care                                                                                                                                                                                                                                                                                                                                                                                                                                                                                                                                                                                                              |
| 8  |   |                                              | The intervention involved four steps. Initially it involved identification of the target patients (HbA1c > 8.5%). The second step involved a virtual clinic meeting (with around 20 cases), involving the community diabetes (specialist) team and practice team. The management plan for each patient was determined. The care was then allocated to primary, intermediate or secondary care. The third step involved the patient consultation, agreeing an individualised plan of management in collaboration with the patient, including therapy changes and addressing patient goals. The fourth step involved a 3-month review by the community diabetes team. |
| 9  |   |                                              | Length: The intervention lasted 12 months with three-monthly reviews by the community diabetes team after the initial consultation.                                                                                                                                                                                                                                                                                                                                                                                                                                                                                                                                 |
| 10 |   |                                              | Predominant EPOC intervention type: Organisational.                                                                                                                                                                                                                                                                                                                                                                                                                                                                                                                                                                                                                 |
| 11 |   |                                              | Comparison: Usual general practice care.                                                                                                                                                                                                                                                                                                                                                                                                                                                                                                                                                                                                                            |
| 12 |   |                                              |                                                                                                                                                                                                                                                                                                                                                                                                                                                                                                                                                                                                                                                                     |
| 13 |   |                                              |                                                                                                                                                                                                                                                                                                                                                                                                                                                                                                                                                                                                                                                                     |
| 14 |   |                                              |                                                                                                                                                                                                                                                                                                                                                                                                                                                                                                                                                                                                                                                                     |
| 15 |   |                                              |                                                                                                                                                                                                                                                                                                                                                                                                                                                                                                                                                                                                                                                                     |
| 16 |   |                                              |                                                                                                                                                                                                                                                                                                                                                                                                                                                                                                                                                                                                                                                                     |
| 17 | 3 | Blackberry<br>2013<br>Victoria,<br>Australia | Telephone coaching by nurses to support diabetes management and self monitoring                                                                                                                                                                                                                                                                                                                                                                                                                                                                                                                                                                                     |
| 18 |   |                                              | The PEACH study:                                                                                                                                                                                                                                                                                                                                                                                                                                                                                                                                                                                                                                                    |
| 19 |   |                                              | GP based nurse led telephone coaching; dealing with lifestyle issues, medication adherence and dosing, self monitoring of their disease, how to take greater initiative in the therapeutic alliance with their doctor, facilitating appropriate intensification of medications to achieve treatment goals. Nurses did not have prescribing rights.                                                                                                                                                                                                                                                                                                                  |
| 20 |   |                                              | Length: In the first six months there were five telephone-coaching sessions at intervals of six weeks in the first six months, a coaching session at 8 and 10 months, a face-to-face coaching session at 12 months and a final coaching session at 15 months.                                                                                                                                                                                                                                                                                                                                                                                                       |
| 21 |   |                                              | Predominant EPOC intervention type: Patient-centred                                                                                                                                                                                                                                                                                                                                                                                                                                                                                                                                                                                                                 |
| 22 |   |                                              | Comparison: Usual general practice care                                                                                                                                                                                                                                                                                                                                                                                                                                                                                                                                                                                                                             |
| 23 |   |                                              |                                                                                                                                                                                                                                                                                                                                                                                                                                                                                                                                                                                                                                                                     |
| 24 |   |                                              |                                                                                                                                                                                                                                                                                                                                                                                                                                                                                                                                                                                                                                                                     |
| 25 |   |                                              |                                                                                                                                                                                                                                                                                                                                                                                                                                                                                                                                                                                                                                                                     |
| 26 |   |                                              |                                                                                                                                                                                                                                                                                                                                                                                                                                                                                                                                                                                                                                                                     |
| 27 |   |                                              |                                                                                                                                                                                                                                                                                                                                                                                                                                                                                                                                                                                                                                                                     |
| 28 | 4 | Capozza<br>2015<br>USA                       | Text-message based behavioural intervention for T2DM                                                                                                                                                                                                                                                                                                                                                                                                                                                                                                                                                                                                                |
| 29 |   |                                              | Receipt of 1-7 text diabetes-related messages per day, depending on the choices they made at enrolment. The content of the text messages were reviewed by certified diabetes educators and patients had control over the types and frequency of the messages. Users could turn off the program by texting the word 'stop'. The core messages related to diabetes education and health improvement (medication reminders, glucose testing reminders, BP measurement reminders and encouraging weight loss). Patients could reply to messages to get feedback.                                                                                                        |
| 30 |   |                                              | Length: 6 months of text messages                                                                                                                                                                                                                                                                                                                                                                                                                                                                                                                                                                                                                                   |
| 31 |   |                                              | Predominant EPOC intervention type: Patient                                                                                                                                                                                                                                                                                                                                                                                                                                                                                                                                                                                                                         |
| 32 |   |                                              | Comparison: Usual care                                                                                                                                                                                                                                                                                                                                                                                                                                                                                                                                                                                                                                              |
| 33 |   |                                              |                                                                                                                                                                                                                                                                                                                                                                                                                                                                                                                                                                                                                                                                     |
| 34 |   |                                              |                                                                                                                                                                                                                                                                                                                                                                                                                                                                                                                                                                                                                                                                     |
| 35 |   |                                              |                                                                                                                                                                                                                                                                                                                                                                                                                                                                                                                                                                                                                                                                     |
| 36 |   |                                              |                                                                                                                                                                                                                                                                                                                                                                                                                                                                                                                                                                                                                                                                     |
| 37 |   |                                              |                                                                                                                                                                                                                                                                                                                                                                                                                                                                                                                                                                                                                                                                     |
| 38 |   |                                              |                                                                                                                                                                                                                                                                                                                                                                                                                                                                                                                                                                                                                                                                     |
| 39 | 5 | Choe                                         | Pharmacist case                                                                                                                                                                                                                                                                                                                                                                                                                                                                                                                                                                                                                                                     |
| 40 |   |                                              | The case manager was a clinical pharmacist who was already established as a pharmacotherapy consultant at the clinic before the start of the intervention. The                                                                                                                                                                                                                                                                                                                                                                                                                                                                                                      |
| 41 |   |                                              |                                                                                                                                                                                                                                                                                                                                                                                                                                                                                                                                                                                                                                                                     |
| 42 |   |                                              |                                                                                                                                                                                                                                                                                                                                                                                                                                                                                                                                                                                                                                                                     |
| 43 |   |                                              |                                                                                                                                                                                                                                                                                                                                                                                                                                                                                                                                                                                                                                                                     |
| 44 |   |                                              |                                                                                                                                                                                                                                                                                                                                                                                                                                                                                                                                                                                                                                                                     |
| 45 |   |                                              |                                                                                                                                                                                                                                                                                                                                                                                                                                                                                                                                                                                                                                                                     |
| 46 |   |                                              |                                                                                                                                                                                                                                                                                                                                                                                                                                                                                                                                                                                                                                                                     |
| 47 |   |                                              |                                                                                                                                                                                                                                                                                                                                                                                                                                                                                                                                                                                                                                                                     |

|                                                                                                                      |                                          |                                                                                                                                            |                                                                                                                                                                                                                                                                                                                                                                                                                                                                                                                                                                                                                                                                                                                                                                                                                                                                                                                                                                                                                                                                                                                                                                                                                                                                                                                                                                                                                                                                                                                                                                                                                                                                                              |
|----------------------------------------------------------------------------------------------------------------------|------------------------------------------|--------------------------------------------------------------------------------------------------------------------------------------------|----------------------------------------------------------------------------------------------------------------------------------------------------------------------------------------------------------------------------------------------------------------------------------------------------------------------------------------------------------------------------------------------------------------------------------------------------------------------------------------------------------------------------------------------------------------------------------------------------------------------------------------------------------------------------------------------------------------------------------------------------------------------------------------------------------------------------------------------------------------------------------------------------------------------------------------------------------------------------------------------------------------------------------------------------------------------------------------------------------------------------------------------------------------------------------------------------------------------------------------------------------------------------------------------------------------------------------------------------------------------------------------------------------------------------------------------------------------------------------------------------------------------------------------------------------------------------------------------------------------------------------------------------------------------------------------------|
| 1<br>2<br>3<br>4<br>5<br>6<br>7<br>8<br>9<br>10<br>11<br>12<br>13                                                    | 2005<br><br>Michigan,<br>USA             | management                                                                                                                                 | <p>clinical pharmacist evaluated patient's therapeutic regimens based on efficacy, safety, adverse effects, drug interactions, drug costs and monitoring. All therapeutic recommendations were discussed with the primary care provider before significant therapy alterations. The pharmacist also followed up on these recommendations. Face to face consultations between pharmacist and physician were included.</p> <p>Length: Initial one-hour consultation with patient and monthly telephone contact thereafter and saw patients in conjunction with their routine primary care visits for one year.</p> <p>Predominant EPOC intervention type: Organisational.</p> <p>Comparison: Usual care.</p>                                                                                                                                                                                                                                                                                                                                                                                                                                                                                                                                                                                                                                                                                                                                                                                                                                                                                                                                                                                   |
| 14<br>15<br>16<br>17<br>18<br>19<br>20<br>21<br>22<br>23<br>24<br>25<br>26<br>27                                     | 6<br><br>Crowley<br><br>2015<br><br>USA  | Intensive telemedicine intervention for veterans                                                                                           | <p>An advanced comprehensive diabetes care (ACDC) program, including telemonitoring, physician guided medication management, self-management behavioural support and physician guided depression management. It was delivered via a telephone using existing staff in the VA.</p> <p>VA home technology (HT) nurses delivered the intervention. Usual care involves HT nurses ringing patients, but they do not deliver a comprehensive diabetes management intervention like ACDC. In terms of telemonitoring, patients were asked and prompted to perform SMBG daily and to submit this on their HT-issued equipment. They were called by a HT nurse if they did not submit data for three days. In terms of self-management every two weeks a HT nurse rang the patient, delivering a diabetes self-management support module. This was a 30-minute telephone call every 2 weeks- reviewing blood glucose data, reconciling medications and reviewed adherence. For the physician medication management component, the HT nurse then contacted the study physician (an endocrinologist) and medication changes (such as insulin changes) were transmitted back to the HT nurse via an EHR- the nurse then relaying this on to the patients. In terms of depression, if the baseline or three-month PHQ9 was high, a psychiatrist or primary care physician input was made.</p> <p>Length: Daily telemonitoring, two weekly calls by a home technology nurse, input by endocrinology to nursing staff at two weekly intervals over six months.</p> <p>Predominant EPOC intervention type: Organisational</p> <p>Comparison: Usual care but received an educational packet in addition.</p> |
| 28<br>29<br>30<br>31<br>32<br>33<br>34<br>35<br>36<br>37<br>38<br>39<br>40<br>41<br>42<br>43<br>44<br>45<br>46<br>47 | 7<br><br>Dale<br><br>2009<br><br>England | <p>Two intervention telecare groups:</p> <p>a) Peer-support telecare intervention</p> <p>b) Diabetic specialist nurse telecare support</p> | <p>Two intervention telecare (telephone) groups:</p> <p>a) Telephone peer-delivered intervention.</p> <p>b) Diabetic specialist nurse telecare support</p> <p>The telecare support was intended to supplement routine care by motivating adherence to the advice provided by the GP or practice nurse at the time of change (medication and/ or lifestyle) in diabetes care.</p> <p>Length of intervention: The first telecare call was made 3-5 days later and a standard package offered support 7-10, 14-18 28-35, 56-70, 56-120 days later.</p> <p>Training for the telecare support was with a two days training programme (motivational interviewing, active listening skills).</p> <p>Peer supporters recruited through a diabetes care user group. Otherwise they were trained as above. Two were excluded from the trial as they could not master the techniques.</p>                                                                                                                                                                                                                                                                                                                                                                                                                                                                                                                                                                                                                                                                                                                                                                                                               |

1  
2  
3  
4  
5  
6  
7  
8  
9  
10  
11  
12  
13  
14  
15  
16  
17  
18  
19  
20  
21  
22  
23  
24  
25  
26  
27  
28  
29  
30  
31  
32  
33  
34  
35  
36  
37  
38  
39  
40  
41  
42  
43  
44  
45  
46  
47

|    |                                                                                         |                                                                                                                                                 |                                                                                                                                                                                                                                                                                                                                                                                                                                                                                                                                                                                                                                                                                                                                                                                                                                                                                                                                                                                                                                                                                                                                                                                                                                                                                                                                                                                                                             |
|----|-----------------------------------------------------------------------------------------|-------------------------------------------------------------------------------------------------------------------------------------------------|-----------------------------------------------------------------------------------------------------------------------------------------------------------------------------------------------------------------------------------------------------------------------------------------------------------------------------------------------------------------------------------------------------------------------------------------------------------------------------------------------------------------------------------------------------------------------------------------------------------------------------------------------------------------------------------------------------------------------------------------------------------------------------------------------------------------------------------------------------------------------------------------------------------------------------------------------------------------------------------------------------------------------------------------------------------------------------------------------------------------------------------------------------------------------------------------------------------------------------------------------------------------------------------------------------------------------------------------------------------------------------------------------------------------------------|
|    |                                                                                         |                                                                                                                                                 | <p>The trained peer supporters had a median diabetes duration of 10 years and 6/9 had T2DM.</p> <p>They were paid a small fee and had access to an experienced DSN educationalist. They were invited to 6 monthly review meetings.</p> <p>Predominant EPOC intervention type: Patient-centred.</p> <p>Comparison: Usual care.</p>                                                                                                                                                                                                                                                                                                                                                                                                                                                                                                                                                                                                                                                                                                                                                                                                                                                                                                                                                                                                                                                                                           |
| 8* | <p>DePue<br/>2013<br/><br/>U.S. Territory of America<br/>Somoa<br/><br/>Cluster RCT</p> | <p>Nurse–Community Health Worker Team in American Somoa</p>                                                                                     | <p>Nurse–Community Health Worker Team: Nurse case manager (NCM) and four community health workers with a minimum of high school education- all staff underwent training. A field director supervised the research.</p> <p>Length: The NCM met with all patients at least once over 12 months, conducting groups sessions with patients at high risk, providing feedback to physicians and oversight of CHW visits. The CHWs helped patients make and keep healthcare appointments, helped patients understand diabetes, reinforced adherence to medications and provided support. Patients at higher risk were seen weekly in a group meeting conducted by the NCM with CHW assistance or, if unable to attend the group meeting, they were seen individually by CHWs.</p> <p>Patients at moderate risk were seen monthly by CHWs and patients at lower risk were seen every 3 months. All individual visits occurred at the patient’s home, workplace, or at TC, per the patient’s choice. Family members were encouraged to attend these visits. BG and BP were monitored at each visit and urgent levels were referred immediately to the TC physician during clinic hours or to the hospital emergency department.</p> <p>Predominant EPOC intervention type: Organisational.</p> <p>Comparison: Usual care. Patients also received a self-care diabetes book and a risk profile was placed in their medical chart.</p> |
| 9  | <p>Edelman<br/>2010<br/><br/>North Carolina and Virginia, USA.</p>                      | <p>Enrollment into a general medical clinic (GMC) with an internist, pharmacist and a nurse or educator that met seven times over 12 months</p> | <p>Patients in the intervention arm were assigned to a group medical clinic (GMC) that met on the patient’s preferred half-day. Each group had 7-8 patients and a care team (a primary care internist, a pharmacist, a nurse or certified diabetes educator).</p> <p>The groups met every 2 months (7 visits over 12 months).</p> <p>Patients were given \$10 for each GMC session they attended. The care team met the group at each visit and each group met the same care team at each visit. Each provider could be a member of more than one care team.</p> <p>Each GMC session lasted 90-120 minutes visit: BP and home glucose values were checked at each GMC session; education assessment was then delivered by nurse or educator- the patients chose certain topics so the education sessions were tailored to the member’s needs. The pharmacist and PCP reviewed the medical record, BP and glucose levels at each session and an individualized management plan directed at improving HbA1c and BP was formulated (medications and lifestyle based). The Primary Care Provider was then informed.</p> <p>Signed attendance contacts to boost attendance, telephone contact if needed to change management based upon lab results.</p> <p>All patients received usual primary care on top of this.</p>                                                                                                         |

|    |                        |                                                                    |                                                                                                                                                                                                                                                                                                                                                                                                                                                                                                                                                                                                                                                                                                                                                                                                                                                                                                                                                                                                                                                                                                                                                                                                                                                                                                                                                                                                                                                                                                                                                                                                                                                                                                                                                                                                                                                                         |
|----|------------------------|--------------------------------------------------------------------|-------------------------------------------------------------------------------------------------------------------------------------------------------------------------------------------------------------------------------------------------------------------------------------------------------------------------------------------------------------------------------------------------------------------------------------------------------------------------------------------------------------------------------------------------------------------------------------------------------------------------------------------------------------------------------------------------------------------------------------------------------------------------------------------------------------------------------------------------------------------------------------------------------------------------------------------------------------------------------------------------------------------------------------------------------------------------------------------------------------------------------------------------------------------------------------------------------------------------------------------------------------------------------------------------------------------------------------------------------------------------------------------------------------------------------------------------------------------------------------------------------------------------------------------------------------------------------------------------------------------------------------------------------------------------------------------------------------------------------------------------------------------------------------------------------------------------------------------------------------------------|
|    |                        |                                                                    | <p>Predominant EPOC intervention type: Organisational.</p> <p>Comparison: Usual care.</p>                                                                                                                                                                                                                                                                                                                                                                                                                                                                                                                                                                                                                                                                                                                                                                                                                                                                                                                                                                                                                                                                                                                                                                                                                                                                                                                                                                                                                                                                                                                                                                                                                                                                                                                                                                               |
| 10 | Edelman<br>2015<br>USA | Nurse case management                                              | <p>A single nurse with experience in case management delivered both the tailored behavioral intervention and the control.</p> <p>For the intervention arm, the content was tailored to each patient's individual barriers to controlling blood sugar or BP. This content was divided into a series of topical modules addressing one or more behaviors appropriate for improving control of BP or blood sugar, and included physical activity, weight reduction, low salt intake, smoking cessation, medication adherence, management of hypoglycemia, and blood glucose monitoring. The modules assessed barriers to specific behaviors, and the nurse then tried to engage the patient in problem-solving in order to determine actions for overcoming these barriers. In addition, barriers that might generalize to a number of problems—specifically, low levels of disease knowledge, poor memory, poor social support, and concern about the quality of physician-patient decision-making—were addressed on their own. Fidelity was assessed by two nurse-investigators (KP, BG), who listened to a sample of 5 % of total calls for delivery of intended content.</p> <p>Length: The nurse rang intervention and control patients 12 times in total over 24 months every 2 months.</p> <p>Predominant EPOC intervention type: Organisational</p> <p>Comparison: "Attention Control". The control patients received calls that were not tailored; these calls provided traditional didactic information on a range of topics that had no relationship to HTN, DM, or any of the behaviors we were trying to improve (e.g., flu shots, skin cancer prevention). Content was tightly scripted, designed to limit the potential for productive interaction between nurse and patient, and was informed by standard guidelines as stated on government websites.</p> |
| 11 | Farmer<br>2012<br>UK   | Nurse-led, multilevel intervention to support medication adherence | <p>Nurse-led, consultation-based intervention to support patients with adherence to taking glucose lowering medications.</p> <p>This was a multi-level intervention, targeting both health professional and patient behaviour. Initially there was training for the clinic nurses provided by a clinical psychologist and an intervention facilitator as the first part of the intervention. The aim was to strengthen patient motivation to take OGLM regularly and support medicine taking through action-plans.</p> <p>8 weeks after recruitment, patients were invited to the intervention visit to record and review their medication; and then randomised to either an intervention to support medication or adherence, or to standard care.</p> <p>There were 2 components in the intervention delivered to patients. (1) nurses elicited patient beliefs about intention to take their medications as prescribed. Positive beliefs were reinforced verbally and non-verbally, through provision of tailored information. Negative beliefs were addressed using problem solving and the nurse facilitated patients in action planning.</p> <p>The intervention consultation took 30 minutes, with 20 minutes for data collection, which both intervention and control patients received.</p> <p>Predominant EPOC intervention type: Organisational.</p>                                                                                                                                                                                                                                                                                                                                                                                                                                                                                                          |

1  
2  
3  
4  
5  
6  
7  
8  
9  
10  
11  
12  
13  
14  
15  
16  
17  
18  
19  
20  
21  
22  
23  
24  
25  
26  
27  
28  
29  
30  
31  
32  
33  
34  
35  
36  
37  
38  
39  
40  
41  
42  
43  
44  
45  
46  
47

|    |                         |                                                                                                                                                                                                                                                    |                                                                                                                                                                                                                                                                                                                                                                                                                                                                                                                                                                                                                                                                                                                                                                                                                                                                                                                                                                                                                                                                                                                                                                                                                                                                                                                                                                                                                                                                                                                                                                                                                                                                                                                                                                                                                                                                                                                                            |
|----|-------------------------|----------------------------------------------------------------------------------------------------------------------------------------------------------------------------------------------------------------------------------------------------|--------------------------------------------------------------------------------------------------------------------------------------------------------------------------------------------------------------------------------------------------------------------------------------------------------------------------------------------------------------------------------------------------------------------------------------------------------------------------------------------------------------------------------------------------------------------------------------------------------------------------------------------------------------------------------------------------------------------------------------------------------------------------------------------------------------------------------------------------------------------------------------------------------------------------------------------------------------------------------------------------------------------------------------------------------------------------------------------------------------------------------------------------------------------------------------------------------------------------------------------------------------------------------------------------------------------------------------------------------------------------------------------------------------------------------------------------------------------------------------------------------------------------------------------------------------------------------------------------------------------------------------------------------------------------------------------------------------------------------------------------------------------------------------------------------------------------------------------------------------------------------------------------------------------------------------------|
|    |                         |                                                                                                                                                                                                                                                    | Comparison: Usual care. The standard care visit lasted approximately 20 minutes, during which data were collected. Same nurses delivered this.                                                                                                                                                                                                                                                                                                                                                                                                                                                                                                                                                                                                                                                                                                                                                                                                                                                                                                                                                                                                                                                                                                                                                                                                                                                                                                                                                                                                                                                                                                                                                                                                                                                                                                                                                                                             |
| 12 | Forjough<br>2014<br>USA | Three intervention groups, reflecting the individual and combined effects of a behavioural and technology intervention; a chronic Disease Self-Management Program (CDSMP) and a diabetes self-care software on a personal digital assistant (PDA). | <p>Four arms in the trial:</p> <ul style="list-style-type: none"> <li>a) Chronic Disease Self Management Program (CDSMP)</li> <li>b) Personal digital assistant (PDA)</li> <li>c) Both CDSMP and PDA</li> <li>d) Usual care</li> </ul> <p>CDSMP: Involved a 6-week, classroom-based program for diabetes self-management. Based upon 1999 paper showing effectiveness of CDSMP. Its goal was to increase self-efficacy to decrease chronic disease related symptoms and avoidable healthcare utilization. It teaches participants techniques to facilitate enhanced decision making, action planning, and effective communication. CDSMP workshops hosted in clinical environments and community-based settings. Fidelity to classes not monitored. Master trainers/ lay leaders underwent 4 days of training- and the lay leaders used pre-scripted materials.</p> <p>PDA: This intervention arm were taught how to use a diabetes self-care software. It was loaded onto a handheld device and was called "Diabetes Pilot". The Diabetes Pilot allowed recording and some monitoring of blood glucose, BP, medication usage, physical activity and dietary intake on the PDA. One-to one instruction by a project coordinator covering key areas such as data entry, foot database utilization and reports was provided. Participants were instructed to input information daily. Training effectiveness was not assessed.</p> <p>CDSMP and PDA group received both.<br/>The CDSMP was a 6 week program, based in a classroom. Unclear how many workshops.<br/>The PDA arm: Uncertain, participants asked to use it daily and input information into it.<br/>Primary outcome 12 months, followed up to 24 months</p> <p>CDSMP: 6 weeks<br/>PDA: Uncertain, possibly 2 years</p> <p>Predominant EPOC intervention type: Patient-centred.</p> <p>Comparison: Usual care along with Texas Diabetes Council patient education materials.</p> |
| 13 | Frosch<br>2011          | A video behavioural support intervention by nurse educators with a workbook                                                                                                                                                                        | Intervention participants received a 24 minute long CDC program with an accompanying booklet called "Living with Diabetes: Making lifestyle changes to last a lifetime"- this was developed by the Foundation for Informed Decision Making. The participants were also entitled to have up to 5 sessions of telephone coaching with a bilingual nurse educator, trained in patient-centred approaches to diabetes management and motivational enhancement- with a goal to collaborate with participants in identifying behavioural goals and a behavioural plan.                                                                                                                                                                                                                                                                                                                                                                                                                                                                                                                                                                                                                                                                                                                                                                                                                                                                                                                                                                                                                                                                                                                                                                                                                                                                                                                                                                           |

|    |                          |                                                                                                            |                                                                                                                                                                                                                                                                                                                                                                                                                                                                                                                                                                                                                                                                                                                                                                                                                                                                                                                                                                                                                                                                                                                                                                                 |
|----|--------------------------|------------------------------------------------------------------------------------------------------------|---------------------------------------------------------------------------------------------------------------------------------------------------------------------------------------------------------------------------------------------------------------------------------------------------------------------------------------------------------------------------------------------------------------------------------------------------------------------------------------------------------------------------------------------------------------------------------------------------------------------------------------------------------------------------------------------------------------------------------------------------------------------------------------------------------------------------------------------------------------------------------------------------------------------------------------------------------------------------------------------------------------------------------------------------------------------------------------------------------------------------------------------------------------------------------|
|    | USA                      | followed by 5 sessions of telephone coaching.                                                              | <p>The first session was 60 minutes in length (2 weeks after enrollment), the second and third were 30 minutes, fourth and fifth were 15 minutes. Interval between telephone coaching was open to participants and nurse educators to negotiate. Both groups received a telephone call one week after enrollment to review intervention materials.</p> <p>Five coaching sessions (spread over a max duration of 2.5 hours) and a 24-minute DVD to watch, as well as a booklet on lifestyle changes in diabetes.</p> <p>Predominant EPOC intervention type: Patient-centred.</p> <p>Comparison: Usual care. Participants also received a 20-page brochure entitled "4 steps to control your diabetes for life" developed by the NIH.</p>                                                                                                                                                                                                                                                                                                                                                                                                                                         |
| 14 | Guerci<br>2003<br>France | A self-monitoring of blood glucose intervention<br><br>Auto-Surveillance Intervention Active (ASIA) study. | <p>Self monitoring of blood glucose (SMBG):</p> <p>Patients received initial training by their GP at the initial inclusion visit. Patients were required to perform at least six capillary assays a week (3 different days, including the weekend).</p> <p>Standardised management including medications, blood glucose level, diet and physical exercise.<br/>Five visits were conducted during the intervention. At each visit, a clinical evaluation was performed. Laboratory values took place at 3 visits. At the third visit the GP could modify the treatments based upon the SBGM. At each consultation the patients were advised about management for T2DM.</p> <p>The intervention period was 24 weeks. Followed up every 6 weeks.</p> <p>Five visits were conducted during the intervention. At each visit, a clinical evaluation was performed (weight, SBP, DBP). Laboratory values took place at 3 visits.. At the third visit the GP could modify the treatments based upon the SBGM. . At each consultation the patients were advised about management of T2DM.</p> <p>Predominant EPOC intervention type: Patient-centred.</p> <p>Comparison: Usual care.</p> |
| 15 | Heisler<br>2010<br>USA   | Reciprocal peer support                                                                                    | <p>Initial face to face meeting in groups of 4-18 (in two age cohorts to aid cohesion and help patients get an age matched peer partner). Patients received \$20 for the initial and 6 monthly assessment.</p> <p>Reciprocal Peer support (RPS)<br/>3 hour group session facilitated by a care manager and research associate. Action planning on laboratory results. Training in peer communication, paired with an age-matched peer for peer support.<br/>Encouraged to call each other at least once per week.. Given a DVD on communication skill and a diabetes self management work book.<br/>Also offered three 1.5 hour group sessions at months 1,3 and 6- entirely patient-driven to discuss progress on action plans. Facilitation by a care manager or research associate.</p> <p>The care managers went through training- 4 hour course on motivational interviewing.</p>                                                                                                                                                                                                                                                                                          |

|    |                        |                                                       |                                                                                                                                                                                                                                                                                                                                                                                                                                                                                                                                                                                                                                                                                                                                                                                                                                                                                                                                                                                                                                                                                                                                                                                                                                                                                        |
|----|------------------------|-------------------------------------------------------|----------------------------------------------------------------------------------------------------------------------------------------------------------------------------------------------------------------------------------------------------------------------------------------------------------------------------------------------------------------------------------------------------------------------------------------------------------------------------------------------------------------------------------------------------------------------------------------------------------------------------------------------------------------------------------------------------------------------------------------------------------------------------------------------------------------------------------------------------------------------------------------------------------------------------------------------------------------------------------------------------------------------------------------------------------------------------------------------------------------------------------------------------------------------------------------------------------------------------------------------------------------------------------------|
|    |                        |                                                       | <p>Nurse care manager (NCM) was usual care: Attended a 1.5 hour session, led by the NCM, to discuss the results from the initial assessment, review results, ask questions and get information. Their care manager's phone number was given and follow up phone calls and face to face meetings were encouraged. Patients were provided with diabetes self management educational materials. In effect this is enhanced usual care- as many patients are not aware of and do not avail of this.</p> <p>Predominant EPOC intervention type: Patient-centred.</p> <p>Comparison: The comparator was enhanced usual care with nurse care management.</p>                                                                                                                                                                                                                                                                                                                                                                                                                                                                                                                                                                                                                                  |
| 16 | Jacobs<br>2012<br>USA  | A pharmacist assisted medication program intervention | <p>PAMPERED (pharmacist assisted medication program enhancing the regulation of diabetes) study:</p> <p>An initial pharmacist-patient clinic visit at baseline involved obtaining a comprehensive medication review; performing a targeted physical assessment including checking BMI, BP and a foot examination; education on diabetes; ordering laboratory values; reviewing, modifying and monitoring the patient's medication and providing detailed counselling on all therapies; facilitating self-monitoring of blood glucose; and providing reinforcement of dietary guidelines and exercise. These recommendations were based on most recent guidance. Approval by the patient's PCP was required before a treatment recommendation was made.</p> <p>Patients were required to attend a minimum of three visits with the pharmacist; at baseline, 6 months and 12 months for focused preventive and secondary diabetes management. Additional visits arranged as clinically appropriate. Laboratory outcomes checked at baseline, 6 and 12 months. On average 6.5 office visits with a pharmacist occurred over the 12 months.</p> <p>Predominant EPOC intervention type: Organisational.</p> <p>Comparison: Usual care.</p>                                                  |
| 17 | Jameson<br>2010<br>USA | A pharmacist collaborative management intervention    | <p>One pharmacist provided the intervention to the entire intervention group. This pharmacist was a board certified pharmacotherapy specialist, had an American Society of Health-System Pharmacists diabetes management traineeship, a postgraduate course in diabetes management from the American Diabetes Association and an educators training program.</p> <p>Patients met the pharmacist at the primary care site for an assessment of medication adherence, barriers to optimizing glucose control and a medication review. Individualized education was provided regarding self-management, lifestyle, medications and monitoring. Guidelines were followed. This included early switching to insulin after failure of 2 oral medications. The PCP approved any changes.</p> <p>After this visit, subsequent visits depended on control. Telephone calls also included.</p> <p>Initial visit. Telephone calls also included. Thereafter conducted as needed- as subsequent visits depended on control.</p> <p>Average 6 office visits and 3 telephone calls per patient over a one-year period. Office visits lasted between 30-60 minutes. Phone calls 10-20 minutes.</p> <p>Predominant EPOC intervention type: Organisational.</p> <p>Comparison: Probably usual care.</p> |



|                                                                                                                   |    |                          |                                                                |                                                                                                                                                                                                                                                                                                                                                                                                                                                                                                                                                                                                                                                                                                                                                                                                                                                                                                                                                                                                                                                                                                                                                                                                                                                                     |
|-------------------------------------------------------------------------------------------------------------------|----|--------------------------|----------------------------------------------------------------|---------------------------------------------------------------------------------------------------------------------------------------------------------------------------------------------------------------------------------------------------------------------------------------------------------------------------------------------------------------------------------------------------------------------------------------------------------------------------------------------------------------------------------------------------------------------------------------------------------------------------------------------------------------------------------------------------------------------------------------------------------------------------------------------------------------------------------------------------------------------------------------------------------------------------------------------------------------------------------------------------------------------------------------------------------------------------------------------------------------------------------------------------------------------------------------------------------------------------------------------------------------------|
| 1<br>2<br>3<br>4<br>5<br>6<br>7<br>8<br>9<br>10<br>11<br>12<br>13<br>14<br>15<br>16<br>17<br>18<br>19<br>20<br>21 | 18 | Jovanovic<br>2004<br>USA | Diabetes case management by a nurse or dietician               | <p>Case Management:</p> <p>Intensive diabetes case management was provided to the intervention group in addition to primary care.</p> <p>Study staff met with all patients at the beginning and end of the trial to assess overall health status and collect study outcomes. Quarterly assessments of outcomes were performed.</p> <p>The case manager was either a nurse or a dietician (working in close collaboration with an endocrinologist). Evidence based practice in terms of insulin initiation was agreed with collaboration with the PCP. Potential barriers to care were identified and educational strategies designed to address these barriers. American Diabetes Association goals for diabetes, BP and lipid treatment were used. Flexibility to allow individualized targets allowed. All patients educated about self-management and given a monitor. Diabetic educators assessed lifestyle behaviours and gave patients strategies to improve self-care. Transportation issues addressed to improve visit completion.</p> <p>Unclear how many meetings or interaction with a case manager occurred over the 36 months</p> <p>Predominant EPOC intervention type: Organisational.</p> <p>Comparison: Usual care from primary care provider.</p> |
| 22<br>23<br>24<br>25<br>26<br>27<br>28<br>29<br>30<br>31                                                          | 19 | Keogh<br>2011<br>Ireland | Psychological family intervention                              | <p>Psychological family intervention for poorly controlled Type 2 diabetes.</p> <p>Three weekly sessions delivered by a health psychologist who had received 16 hours of training in motivational interviewing. The first two sessions lasted 45 minutes, taking place in the patient's home, with a family member. The third and final session was a 10-15 minute telephone call. Each session was tailored to the patient's needs involving a/ challenging negative perceptions of diabetes, 2/ examining how negative perceptions influenced self management and 3/ developing ways to improve self management and mobilise family support. Techniques such as exchange information, elicitation of change talk, reducing resistance, building self-efficacy, problem solving and goal setting were used.</p> <p>Predominant EPOC intervention type: Organisational.</p> <p>Comparison: Usual care.</p>                                                                                                                                                                                                                                                                                                                                                          |
| 32<br>33<br>34<br>35<br>36<br>37<br>38<br>39<br>40                                                                | 20 | Kim<br>2009<br>USA       | A Community-based, culturally tailored behavioral intervention | <p>Culturally tailored comprehensive T2DM management intervention for Korean American immigrants.</p> <p>A community based self-help intervention program for type 2 diabetes mellitus (SHIP- DM) involving structured psycho-behavioural education, home glucose and BP telemonitoring and individualized telephone counselling from a bilingual nurse.</p> <p>It consisted of three concurrent programs.</p> <p>First, a 2 hourly weekly education session was delivered for 6 weeks. This was delivered at a community site by trained nurses and a nutritionist- to enhance knowledge and promote diabetes self-care behaviours for glucose control.</p>                                                                                                                                                                                                                                                                                                                                                                                                                                                                                                                                                                                                        |

41  
42  
43  
44  
45  
46  
47

|    |                      |                                                                               |                                                                                                                                                                                                                                                                                                                                                                                                                                                                                                                                                                                                                                                                                                                                                                                                                                                                                                                                                                                                                                                                                                                                                                                                                                                                                                                                                                                         |
|----|----------------------|-------------------------------------------------------------------------------|-----------------------------------------------------------------------------------------------------------------------------------------------------------------------------------------------------------------------------------------------------------------------------------------------------------------------------------------------------------------------------------------------------------------------------------------------------------------------------------------------------------------------------------------------------------------------------------------------------------------------------------------------------------------------------------------------------------------------------------------------------------------------------------------------------------------------------------------------------------------------------------------------------------------------------------------------------------------------------------------------------------------------------------------------------------------------------------------------------------------------------------------------------------------------------------------------------------------------------------------------------------------------------------------------------------------------------------------------------------------------------------------|
|    |                      |                                                                               | <p>Secondly, there was home glucose monitoring and teletransmission- this lasted for 24 weeks after the educational program- each patient received monitors and a teletransmission system. Nurses could view this information.</p> <p>Thirdly, monthly telephone counselling by a bilingual nurse for 24 weeks was provided according to a standardized protocol- to reinforce new knowledge, to discuss problems, find solutions and provide emotional support. These lasted 10-25 minutes.</p> <p>At least 7 (one meeting and monthly telephone contact X 6 months)</p> <p>Predominant EPOC intervention type: Patient-centred.</p> <p>Comparison: Usual care with delayed intervention.</p>                                                                                                                                                                                                                                                                                                                                                                                                                                                                                                                                                                                                                                                                                          |
| 21 | Krein<br>2004<br>USA | Case management by nurse practitioners                                        | <p>Collaborative case management.</p> <p>All participants in trial given a blood pressure monitor, educational material and a periodical newsletter</p> <p>Two nurse practitioner care managers worked with patients and their primary care providers, monitoring and coordinating care for the intervention group for 18 months, through telephone calls, collaborative goal setting and treatment algorithms.</p> <p>There were two nurse case managers. One nurse was present at each site, providing 20 hours of care per week, to approximately 60 patients each. They had a 2 days training program on collaborative goal setting- and training updates at 6-month intervals.</p> <p>Patient contact was predominantly by telephone, though face-to-face contact could happen. Case managers encouraged self-management, diet exercise, provided reminders of screenings and tests, monitored home glucose and BP measures and identified medication changes as needed. Medications treatment algorithms were given to the case managers. Every change was approved by the PCP- being notified of changes by email.</p> <p>Predominant EPOC intervention type: Organisational.</p> <p>Comparison: Usual care. Patients also received educational materials. All participants in trial were given a blood pressure monitor, educational materials and a periodical newsletter.</p> |
| 22 | Long<br>2012<br>USA  | Two interventions:<br>Peer mentoring<br>Financial incentivisation of patients | <p>Two intervention groups, one control. Received €25 for filling out a survey at Month 0 and Month 6. Also were notified of their starting HbA1c level and of the ADA and VA recommendations.</p> <p>1/ Peer mentoring:<br/>Patients in this group matched to a peer supporter within 1-3 weeks. Peer reviewers were all African American patients with prior poor T2Dm control in the past but well controlled recently. They were matched by sex and age (+/- 10 years).</p> <p>Training: They received a 1-hour long 1:1 training session informed by motivational interviewing techniques. Uncertain who trained the peer mentors.</p> <p>No monitoring of the calls. The mentor-mentee contacts were all telephone calls. Mentors were incentivized with \$20 per month if they talked at least once per</p>                                                                                                                                                                                                                                                                                                                                                                                                                                                                                                                                                                      |

|    |                                                         |                                                                               |                                                                                                                                                                                                                                                                                                                                                                                                                                                                                                                                                                                                                                                                                                                                                                                                                                                                                                                                                                                          |
|----|---------------------------------------------------------|-------------------------------------------------------------------------------|------------------------------------------------------------------------------------------------------------------------------------------------------------------------------------------------------------------------------------------------------------------------------------------------------------------------------------------------------------------------------------------------------------------------------------------------------------------------------------------------------------------------------------------------------------------------------------------------------------------------------------------------------------------------------------------------------------------------------------------------------------------------------------------------------------------------------------------------------------------------------------------------------------------------------------------------------------------------------------------|
|    |                                                         |                                                                               | <p>week with their mentee. Mentors were also given \$25 after the training session and after an exit interview.</p> <p>Peer mentoring: Aiming to have 4 calls per month for 6 months. The Results showed 38% mentors talked 4 times per month during the first month and by Month 6, that reduced to 16%</p> <p>2/ Financial incentives<br/>In the financial incentive arm, participants were told that they would receive \$100 at 6 months if their HbA1c level decreased by 1%, and \$200 if it reduced by 2% or to 6.5%.</p> <p>Predominant EPOC intervention type: Patient-centred.</p> <p>Comparison: Usual care.</p>                                                                                                                                                                                                                                                                                                                                                              |
| 23 | <p>Maislos</p> <p>2002</p> <p>Israel</p>                | <p>A mobile clinic providing interdisciplinary care</p>                       | <p>Interdisciplinary care via a mobile clinic offered by the Western Negev Mobile Clinic Diabetes Program (WNMCDP).</p> <p>WNMCDP is a weekly mobile diabetes clinic aimed to provide interdisciplinary care for patients, in primary care facilities. An initial visit involved a meeting with a diabetologist, the dietician and a nurse educator. After this regular follow visits were scheduled. The team held a weekly evening meeting at the clinic and the nurse and dietician have an additional weekly meeting at the primary care site. At the meeting, all patients received dietary counselling and have a session with the nurse educator. Continuation of treatment and follow up visits are scheduled according to the patient's condition. Special emphasis was placed on education, to improve compliance and lifestyle behaviours.</p> <p>Mobile clinic visited weekly.</p> <p>Predominant EPOC intervention type: Organisational.</p> <p>Comparison: Usual care.</p> |
| 24 | <p>Mathers</p> <p>2012</p> <p>UK</p> <p>Cluster RCT</p> | <p>Patient decision aid to improve decision quality and glycaemic control</p> | <p>PANDAs study: using patient decision aid (PDA):</p> <p>A complex intervention with three components; PDA, healthcare professional training workshop and use of PDA in a consultation.</p> <p>Development of PDA done with MRC framework- to facilitate decision making between clinicians and patients</p> <p>Doctors and nurses involved with diabetes care in the practice attended a 2-hour training session on how to use the PANDAs decision aid (shared decision making, communication skills, the evidence of different treatment options).</p> <p>The PANDAs decision aid was given to the patient prior to the consultation with the nurse or GP- it included information about insulin or other treatments, presented probabilities of outcomes, it clarified patient values and gave structured guidance. The patient then saw the GP and nurse, facilitated with the use of the PANDAs aid.</p> <p>This was a one off intervention given on 1 day</p>                     |

1  
2  
3  
4  
5  
6  
7  
8  
9  
10  
11  
12  
13  
14  
15  
16  
17  
18  
19  
20  
21  
22  
23  
24  
25  
26  
27  
28  
29  
30  
31  
32  
33  
34  
35  
36  
37  
38  
39  
40  
41  
42  
43  
44  
45  
46  
47

|    |                                                                  |                                                                                                                                                                                                 |                                                                                                                                                                                                                                                                                                                                                                                                                                                                                                                                                                                                                                                                                                                                                                                                                                                                                                                                                                                                                                                                                                                                                                                             |
|----|------------------------------------------------------------------|-------------------------------------------------------------------------------------------------------------------------------------------------------------------------------------------------|---------------------------------------------------------------------------------------------------------------------------------------------------------------------------------------------------------------------------------------------------------------------------------------------------------------------------------------------------------------------------------------------------------------------------------------------------------------------------------------------------------------------------------------------------------------------------------------------------------------------------------------------------------------------------------------------------------------------------------------------------------------------------------------------------------------------------------------------------------------------------------------------------------------------------------------------------------------------------------------------------------------------------------------------------------------------------------------------------------------------------------------------------------------------------------------------|
|    |                                                                  |                                                                                                                                                                                                 | <p>Predominant EPOC intervention type: Professional.</p> <p>Comparison: Usual care.</p>                                                                                                                                                                                                                                                                                                                                                                                                                                                                                                                                                                                                                                                                                                                                                                                                                                                                                                                                                                                                                                                                                                     |
| 25 | <p>McDermott</p> <p>2015</p> <p>Australia</p> <p>Cluster RCT</p> | <p>Community-based health-worker led case management approach to the care of Indigenous adults with poorly controlled type 2 diabetes in primary care services in remote northern Australia</p> | <p>Each site allocated to the intervention arm recruited an Indigenous health worker resident in the community (selected by the health service) to work as part of the primary care team, and allocated a caseload of between 9 and 26 clients. The health workers with low caseloads worked part-time. All health workers at the commencement of the study received an intensive 3-week training in clinical aspects of diabetes and other chronic condition care, including how to support patients in self-management skills, advice on medications, routine foot care, nutrition, smoking cessation, follow up referrals to other providers, and scheduled tests.</p> <p>Length: During the 18 month intervention period, the health workers attended two workshops where they underwent refresher training, including in Good Clinical Practice and reflective practice. During these sessions, they reported on their patients' progress and shared approaches to problem solving with the clinical support team and peers.</p> <p>Predominant EPOC intervention type: Organisational</p> <p>Comparison: Usual care.</p>                                                              |
| 26 | <p>McMahon</p> <p>2005</p> <p>USA</p>                            | <p>Web-based care management</p>                                                                                                                                                                | <p>Web based care management involving training and giving a notebook computer, glucose and blood pressure monitoring devices and access to a care management website. The website provided educational modules, accepted uploads from monitoring devices and had an internal messaging system for patients to communicate with the care manager. Given free internet.</p> <p>Training to each participant for mean of 2.3 hours. Home BP monitoring encouraged three times weekly. Glucose monitoring frequency was individualized. Participants could communicate with a care manager through the website. If they did not use the website for two weeks, they were contacted by phone.</p> <p>An advanced practice nurse reviewed patient information and provided recommendation to the PCP about treatment changes, based upon guidelines.</p> <p>Episodes: Unclear, one training session and then self-usage of web management (patients contacted if they didn't use after 2 weeks). 1 year.</p> <p>Predominant EPOC intervention type: Organisational.</p> <p>Comparison: Usual care. All participants attended a self-management educational session (prior to randomization).</p> |
| 27 | <p>Mons</p> <p>2013</p> <p>Germany</p>                           | <p>Supportive telephone counseling</p>                                                                                                                                                          | <p>Supportive telephone counseling intervention led by practice nurses of the participating GP practices- monthly over 12 months. Each nurse was trained before hand. Each call lasted 10 minutes, was structured and included questions on patients' physical and mental condition, medication adherence, symptoms, and lifestyle advice. The items were designed to motivate the patients, identify barriers and help self-management.</p> <p>Monthly over 12 months. Over 90% had 10-12 sessions.</p> <p>Predominant EPOC intervention type: Patient-centred.</p> <p>Comparison: Usual care.</p>                                                                                                                                                                                                                                                                                                                                                                                                                                                                                                                                                                                         |

|    |                                        |                                                                                                  |                                                                                                                                                                                                                                                                                                                                                                                                                                                                                                                                                                                                                                                                                                                                                                                                                             |
|----|----------------------------------------|--------------------------------------------------------------------------------------------------|-----------------------------------------------------------------------------------------------------------------------------------------------------------------------------------------------------------------------------------------------------------------------------------------------------------------------------------------------------------------------------------------------------------------------------------------------------------------------------------------------------------------------------------------------------------------------------------------------------------------------------------------------------------------------------------------------------------------------------------------------------------------------------------------------------------------------------|
| 28 | O'Connor<br>2014<br>USA<br>Cluster RCT | Telephone Outreach to Improve Medication Adherence and Metabolic Control in Adults With Diabetes | <p>The telephone intervention was delivered by interventionists who were pharmacists, diabetes educators, or nurse health managers trained in the use of the study protocol and intervention. Those randomized to the intervention, who had recently been prescribed a new medication for poorly controlled T2DM, received a single structured telephone call to ascertain if the patient had started the medication. Positive reinforcement was made to those who had started. For those who had not started, the interventionist probed for reasons of non-adherence and resolved to solve any barriers.</p> <p>Length: One phone-call lasting &lt; 5 minutes. Most calls occurred within 2-6 weeks after prescription date.</p> <p>Predominant EPOC intervention type: Organisational</p> <p>Comparison: Usual care.</p> |
| 29 | Odegard<br>2005<br>USA                 | A pharmacist intervention care management intervention                                           | <p>Pharmacist intervention was composed of a diabetes care plan (DCP), a regular pharmacist-patient communication on diabetes care progress and pharmacist-provider communication on the subject's diabetes care progress. Medication related problems were identified. The intervention commenced one week after baseline data interview. A face-to-face appointment created this DCP which was communicated to the PCP.</p> <p>Weekly face-to-face or telephone communication was kept with the patient and the pharmacist- then reduced to monthly when deemed necessary over a 6-month period.</p> <p>On average there were 4.5 telephone contacts and 2.1 in person visits.</p> <p>Predominant EPOC intervention type: Organisational.</p> <p>Comparison: Usual care.</p>                                              |
| 30 | Palmas<br>2014<br>USA                  | Community health worker (CHW) intervention in an Hispanic population                             | <p>12-month CHW intervention or enhanced usual care</p> <p>Two full time CHWs delivered a multicomponent intervention that included one-to-one visits, group visits and telephone follow up. They used the Small Steps, Big Rewards framework. Goal setting and discussing barriers were features of the visits. A needs assessment was performed throughout the year.</p> <p>Episodes of care:<br/>Aimed for 4 1:1 visits, 10 groups sessions and 20 follow up phone calls over the year per subject.</p> <p>Predominant EPOC intervention type: Patient-centred.</p> <p>Comparison: 'Enhanced usual care'. Spanish-language educational material posted every three months, preceded by phone calls, to ensure participants received the brochures.</p>                                                                   |
| 31 | Phillis-Tsimikas                       | Peer-led diabetes education programs in high-risk Mexican                                        | <p>Assessments at month 0, 4 (post intervention) and 10- intervention participants were given a glucometer and a small gift card. The Project Dulce (intervention) group received eight weekly 2 hour diabetes self management classes for two months; and then monthly support groups, each 2 hours in length, led by a trained peer educator. Before the intervention those individuals, living in this community, with diabetes, that had traits of being a good leader were identified</p>                                                                                                                                                                                                                                                                                                                              |

1  
2  
3  
4  
5  
6  
7  
8  
9  
10  
11  
12  
13  
14  
15  
16  
17  
18  
19  
20  
21  
22  
23  
24  
25  
26  
27  
28  
29  
30  
31  
32  
33  
34  
35  
36  
37  
38  
39  
40  
41  
42  
43  
44  
45  
46  
47

|    |                                                    |                                                                                                                 |                                                                                                                                                                                                                                                                                                                                                                                                                                                                                                                                                                                                                                                                                                                                                                                                                                                                                                                                                                                                                                                                                                                                                                                                                                                                                                                                                                                                                                                                                                                                                                                                                                                                                                                                                                         |
|----|----------------------------------------------------|-----------------------------------------------------------------------------------------------------------------|-------------------------------------------------------------------------------------------------------------------------------------------------------------------------------------------------------------------------------------------------------------------------------------------------------------------------------------------------------------------------------------------------------------------------------------------------------------------------------------------------------------------------------------------------------------------------------------------------------------------------------------------------------------------------------------------------------------------------------------------------------------------------------------------------------------------------------------------------------------------------------------------------------------------------------------------------------------------------------------------------------------------------------------------------------------------------------------------------------------------------------------------------------------------------------------------------------------------------------------------------------------------------------------------------------------------------------------------------------------------------------------------------------------------------------------------------------------------------------------------------------------------------------------------------------------------------------------------------------------------------------------------------------------------------------------------------------------------------------------------------------------------------|
|    | 2011<br><br>USA                                    | Americans                                                                                                       | <p>and trained over a 3 month period. Peer educators spent 40 hours learning the curriculum, behavior modification techniques etc. Then they co-taught a session with a trainer, before being supervised giving a session before doing it alone. The curriculum covered many aspect of diabetes management. If patients were noticed not be meeting targets for diabetes care, the peer educator would direct them to the PCP- they would not make any medication related changes themselves.</p> <p>Episodes of care: Unclear how many, but envisaged as 8 weekly classes for two months, then monthly for the next three months.</p> <p>Predominant EPOC intervention type: Patient-centred.</p> <p>Comparison: Usual care.</p>                                                                                                                                                                                                                                                                                                                                                                                                                                                                                                                                                                                                                                                                                                                                                                                                                                                                                                                                                                                                                                       |
| 32 | Polonsky<br><br>2011<br><br>USA<br><br>Cluster RCT | Self blood glucose monitoring                                                                                   | <p>STeP (Structured Testing Programme) is a 12-month Cluster RCT assessing efficacy of structured self-monitoring of blood glucose (SMBG) in T2DM patients (none on insulin).</p> <p>Both physicians and patients participated in a collaborative programme to gather, interpret and act upon the structured SMBG data, at 3 monthly intervals, to make treatment modifications.</p> <p>The study's duration was 12 months with patient visits occurring at initial screening and baseline followed by visits at months 1, 3, 6, 9, and 12.</p> <p>At all subsequent visits (months 1, 3, 6, 9, and 12), ACG and STG clinic staff collected laboratory samples, recorded changes in medications, and performed brief physical examinations. Point-of-care A1C equipment (A1CNow+ test kit; Bayer Healthcare, Tarrytown, NY) was provided to all practices for clinical use only to assure that differential availability of the equipment did not affect outcomes. Patients in both groups brought their meters to each subsequent visit for electronic data uploading; physicians and clinic staff were blinded to these data and all other study-collected measures. Patients also reported all changes made to their diabetes regimen since their last visit. All patients completed the STeP questionnaire and a post-visit questionnaire to record physician discussion of SMBG results and recommendations for pharmacologic and lifestyle changes that occurred during the visit.</p> <p>Predominant EPOC intervention type: Patient-centred.</p> <p>Comparison: 'Enhanced usual care': quarterly diabetes focused physician visits, free blood glucose meters and strips and they were evaluated at months 1, 3, 6, 9 and 12 (like the intervention group).</p> |
| 33 | Protheroe<br><br>2016<br><br>UK                    | Lay Health Trainer (LHT) interviews with patients, creating a self-management plan, with supportive phone calls | <p>A structured interview with a Lay Health Trainer (LHT) and development of an individualised patient self-management plan and follow up thereafter with phone calls. The LHTs were trained on diabetes care and lifestyle advice, but they did not provide medical or nursing advice. They provided information to participants regarding advantages and disadvantages of behaviour change.</p> <p>Length: The intervention lasted 6 months. An initial structured interview was followed by up to three two-monthly support phone calls from the LHT for a maximum of 6 months.</p> <p>Predominant EPOC intervention type: Organisational</p>                                                                                                                                                                                                                                                                                                                                                                                                                                                                                                                                                                                                                                                                                                                                                                                                                                                                                                                                                                                                                                                                                                                        |

|    |                                     |                                                                                   |                                                                                                                                                                                                                                                                                                                                                                                                                                                                                                                                                                                                                                                                                                                                                                                                                                                                                                                                                                                                                                                                                                                                                                                                                                                           |
|----|-------------------------------------|-----------------------------------------------------------------------------------|-----------------------------------------------------------------------------------------------------------------------------------------------------------------------------------------------------------------------------------------------------------------------------------------------------------------------------------------------------------------------------------------------------------------------------------------------------------------------------------------------------------------------------------------------------------------------------------------------------------------------------------------------------------------------------------------------------------------------------------------------------------------------------------------------------------------------------------------------------------------------------------------------------------------------------------------------------------------------------------------------------------------------------------------------------------------------------------------------------------------------------------------------------------------------------------------------------------------------------------------------------------|
|    |                                     |                                                                                   | Comparison: Usual general practice care                                                                                                                                                                                                                                                                                                                                                                                                                                                                                                                                                                                                                                                                                                                                                                                                                                                                                                                                                                                                                                                                                                                                                                                                                   |
| 34 | Quinn<br>2011<br>USA<br>Cluster RCT | Mobile phone-based treatment/<br>behavioural coaching intervention                | <p>Mobile phone-based treatment/ behavioural coaching intervention</p> <p>26 primary care practices, randomly assigned to one of four groups:</p> <p>1/ Coach-only (CO) group- included a mobile diabetes management software application and a web portal. The mobile software allowed patients to enter diabetes self-care data (glucose, diet, medications) on a mobile phone and receive automated, real-time educational, behavioural and motivational messaging specific to the entered data.</p> <p>2/ Coach PCP portal (CPP)- The patient web portal augmented the mobile software and had a secure messaging centre with additional information.</p> <p>3/ Coach PCP portal with decision support (CPDS): This group had providers with access to analysed patient data that could make decisions linked to standards of care.</p> <p>All patients received a glucometer and mobile phone with 1 year unlimited free data and service plan. Diabetes educators intermittently reviewed the patient data. Patients could communicate by phone or electronically to educators. Patients also received an electronic action plan every 2.5 months.</p> <p>Predominant EPOC intervention type: Patient-centred.</p> <p>Comparison: Usual care.</p>   |
| 35 | Rothman<br>2005<br>USA              | A primary care-based disease management program delivered by trained pharmacists. | <p>Pharmacist intervention: Three pharmacists (trained in the outpatient department) delivered the intervention within the general medicine practice - two of them were diabetic educators. The intervention included intensive educational sessions, evidence-based algorithms, proactive management of clinical parameters and treatment recommendations that were shared with the PCP.</p> <p>A diabetes care coordinator was also part of the intervention and this person addressed health behaviour and education- this coordinator rang patients regularly.</p> <p>Pharmacists rang the patient or met them every 2-4 weeks, or more frequently if needed. Unclear if there was a face to face meeting (probably was in the General Medicine Practice. A coordinator also rang patients from time to time.</p> <p>A median of 45 contacts or care-related activities between pharmacists and patients were recorded; about 38 minutes each month.</p> <p>Predominant EPOC intervention type: Organisational.</p> <p>Comparison: Usual care after a 1-hour management session that was conducted by a clinical pharmacist practitioner from the disease management team, including education and treatment recommendations approved by the PCP.</p> |
| 36 | Schillinger                         | Two interventions:                                                                | Two interventions in the Improving Diabetes Efforts Across Language and Literacy (IDEALL) Project:                                                                                                                                                                                                                                                                                                                                                                                                                                                                                                                                                                                                                                                                                                                                                                                                                                                                                                                                                                                                                                                                                                                                                        |

1  
2  
3  
4  
5  
6  
7  
8  
9  
10  
11  
12  
13  
14  
15  
16  
17  
18  
19  
20  
21  
22  
23  
24  
25  
26  
27  
28  
29  
30  
31  
32  
33  
34  
35  
36  
37  
38  
39  
40  
41  
42  
43  
44  
45  
46  
47

|           |                             |                                                                                                                              |                                                                                                                                                                                                                                                                                                                                                                                                                                                                                                                                                                                                                                                                                                                                                                                                                                                                                                                                                                                                                                                                                                                                                                                                                                                                                                                                                                                       |
|-----------|-----------------------------|------------------------------------------------------------------------------------------------------------------------------|---------------------------------------------------------------------------------------------------------------------------------------------------------------------------------------------------------------------------------------------------------------------------------------------------------------------------------------------------------------------------------------------------------------------------------------------------------------------------------------------------------------------------------------------------------------------------------------------------------------------------------------------------------------------------------------------------------------------------------------------------------------------------------------------------------------------------------------------------------------------------------------------------------------------------------------------------------------------------------------------------------------------------------------------------------------------------------------------------------------------------------------------------------------------------------------------------------------------------------------------------------------------------------------------------------------------------------------------------------------------------------------|
|           | <p>2009<br/>USA</p>         | <p>Self-Management Support via 1/ Automated telephone self-management support (ATSM) and 2/ Group medical visits (GMVs).</p> | <p>Two self management support (SMS) systems, conducted in a safety net health system were tested against a control; a) Automated telephone self management support (ATSM) and b) Group medical visits (GMVs).</p> <p>ATSM and GVCs attempt to activate patients, routed in efficacy theory.</p> <p>ATSM:<br/>ATSM patients received automated (pre-recorded) telephone calls over 39 weeks (9 months). Patient responses triggered immediate automated education messages and/ or a subsequent nurse phone follow-up. Each call took 5-10 minutes. The mean number automated calls completed over 9 months was 21.9 (envisaged to be 39); mean number of call backs was 9.2.</p> <p>GVC:<br/>The GVC group received 90-minute monthly sessions over 9 months, with 6-10 participants, co-facilitated by a primary care physician and health educator. Participants in this group received bus tokens and snacks. Mean number of GMVs attended was 4.8 out of 9.</p> <p>There was no specific expectation regarding co-management with the primary care physician. In both interventions action plans regarding self management were generated (information in other papers).</p> <p>All participants received €15 and €25 dollars for the baseline and one year follow up assessment.</p> <p>Predominant EPOC intervention type: Patient-centred.</p> <p>Comparison: Usual care.</p> |
| <p>37</p> | <p>Sen<br/>2014<br/>USA</p> | <p>Financial incentives for home based monitoring- two interventions</p>                                                     | <p>Two intervention groups received financial incentives for home-based health monitoring. All three groups received three biometric devices, a self monitoring glucose device, a digital BP monitor and a device to automatically transmit readings from the biometric devices to the study website. All patients were instructed to use the biometric devices daily. In the intervention arms, participants who used all three devices on a given day were entered into a lottery to win something on the following day. In the daily lottery process, numbers between 0-99 were picked by the participant.</p> <p>In the high incentive intervention the average daily reward was €2.80; a two digit match (1: 100 chance) yielded a €100 award and a one digit match (1: 5 chance) yielded a €10 award.</p> <p>In the low incentive intervention, rewards were €50 and €5 respectively, expecting an average daily reward of €1.40.</p> <p>Each day all incentive arm participants were reminded by text message or email informing them of the lottery numbers. A study coordinator met with all participants at 3 and 6 months- participants were paid €25 for each visit.</p> <p>Episodes of care: daily</p> <p>Predominant EPOC intervention type: Financial</p> <p>Comparison: 'Daily home monitoring control group' received biometric devices.</p>                         |



|                                                                                                                                                    |    |                                 |                                                                 |                                                                                                                                                                                                                                                                                                                                                                                                                                                                                                                                                                                                                                                                                                                                                                                                                                                                                                                                                                                                                                                                                                                                                                                                                                                                                                                                                                                                                                                                                                                                                                                                                         |
|----------------------------------------------------------------------------------------------------------------------------------------------------|----|---------------------------------|-----------------------------------------------------------------|-------------------------------------------------------------------------------------------------------------------------------------------------------------------------------------------------------------------------------------------------------------------------------------------------------------------------------------------------------------------------------------------------------------------------------------------------------------------------------------------------------------------------------------------------------------------------------------------------------------------------------------------------------------------------------------------------------------------------------------------------------------------------------------------------------------------------------------------------------------------------------------------------------------------------------------------------------------------------------------------------------------------------------------------------------------------------------------------------------------------------------------------------------------------------------------------------------------------------------------------------------------------------------------------------------------------------------------------------------------------------------------------------------------------------------------------------------------------------------------------------------------------------------------------------------------------------------------------------------------------------|
| 1<br>2<br>3<br>4<br>5<br>6<br>7<br>8<br>9<br>10<br>11<br>12<br>13<br>14<br>15<br>16<br>17<br>18<br>19<br>20<br>21<br>22                            | 38 | Sugiyama<br><br>2015<br><br>USA | Diabetes self-management education by trained health educators. | <p>Called the Diabetes Self-Care Study, the intervention involved community-based diabetes self-management education (DSME).</p> <p>All study participants were given glucose meters and testing strips, and received a 2-hour training on self-monitoring of blood glucose by a certified diabetes educator. Health educators, who delivered the education, completed a one-year training program and received 8 hours of curricula delivered by the study team about diabetes and its clinical presentations and complications. Additionally, they received 12 hours of training and implementation of the empowerment sessions.</p> <p>Length: Participants in the intervention group received six weekly two-hour group self-care sessions consisting of 8 to 10 persons per group, conducted in English or Spanish, and facilitated by health educators. In the group session, participants identified self-management challenges and discussed why each activity was challenging and how to solve it.</p> <p>Each participant also had a one-on-one session with the health educator to review his or her baseline and follow-up laboratory and biometric data during one of the group sessions.</p> <p>There was also a \$10 gift card for each assessment.</p> <p>Predominant EPOC intervention type: Patient</p> <p>Comparison: Usual care.</p>                                                                                                                                                                                                                                                                |
| 23<br>24<br>25<br>26<br>27<br>28<br>29<br>30<br>31<br>32<br>33<br>34<br>35<br>36<br>37<br>38<br>39<br>40<br>41<br>42<br>43<br>44<br>45<br>46<br>47 | 39 | Tang<br><br>2013<br><br>USA     | Online disease management of diabetes                           | <p>Online disease management of diabetes: Engaging and Motivating Patients online with Enhanced Resources- Diabetes (EMPOWER-D):</p> <p>A personalized healthcare program (PHCP) comprising nurse care managers authorized to change medications, multi-disciplinary team based care, patient self-management tools and an online communication channel between patients and their healthcare team. This intervention comprised:</p> <ol style="list-style-type: none"> <li>1/ Wireless glucometer uploading of information to the electronic health record</li> <li>2/ A diabetes summary sheet with a personalized action plan and treatment goals, including displaying the risk of a variety of diabetes related complications, medication information and monitoring information.</li> <li>3/ A nutrition log</li> <li>4/ Insulin record</li> <li>5/ Exercise log</li> <li>6/ Online communication/ messaging system</li> <li>7/ Nurse care managers who provide advice and can make medication changes.</li> <li>8/ Patient specific text and video educational material.</li> </ol> <p>On top of this, participants in the intervention group had 3 in-persons visits, firstly a 90 minute group visit introducing the online tools, a 90 minute 1:1 meeting with a nurse care manager to develop a shared care plan and 3/ a 60 minute visit with a registered dietician. Also a pharmacist reviewed all intervention group medications and made recommendations- they were also consulted throughout the trial.</p> <p>Predominant EPOC intervention type: Patient-centred.</p> <p>Comparison: Usual care.</p> |

|    |                       |                                                                                                                        |                                                                                                                                                                                                                                                                                                                                                                                                                                                                                                                                                                                                                                                                                                                                                                                                                                                                                                                                                                                                                 |
|----|-----------------------|------------------------------------------------------------------------------------------------------------------------|-----------------------------------------------------------------------------------------------------------------------------------------------------------------------------------------------------------------------------------------------------------------------------------------------------------------------------------------------------------------------------------------------------------------------------------------------------------------------------------------------------------------------------------------------------------------------------------------------------------------------------------------------------------------------------------------------------------------------------------------------------------------------------------------------------------------------------------------------------------------------------------------------------------------------------------------------------------------------------------------------------------------|
| 40 | Taylor<br>2003<br>USA | Nurse care management (NCM)                                                                                            | <p>Nurse care management (NCM): Initial 90 minute meeting with a registered nurse to review patient medications, lifestyle and psychosocial status. Self-management plan was developed.</p> <p>Then a weekly group class (1-2 hours with 4-10 per class) was scheduled for 4 weeks; including group discussion and problem solving.</p> <p>This was followed with telephone follow-up calls at week 4,5,8,12,16,20,28,36 and 44 (9 in total) from the nurse, averaging 15 minutes each. The nurse care managers gave advice as per agreed protocols. The PCP was called if a change in medication was recommended. The NCMs underwent specific training.</p> <p>Episodes of care: 5 visits and 9 telephone calls</p> <p>Predominant EPOC intervention type: Organisational.</p> <p>Comparison: Some educational materials, otherwise usual care.</p>                                                                                                                                                            |
| 41 | Thom<br>2013<br>USA   | Peer health coaching                                                                                                   | <p>Potential peer coaches attended 36 hours of training over 8 weeks using a curriculum developed by the study team- learning active listening, non-judgmental communication, helping with diabetes self-management skills, provision of support, assisting with lifestyle change, facilitating medication adherence and understanding and navigation of the health system. There was a written and oral assessment for these persons- those who passed became peer coaches.</p> <p>The peer coach- patient interaction was at the discretion of the patient and peer coach, either in person or by telephone contact, either outside or inside the clinic.</p> <p>The goal was for two telephone contacts every month and two or more in-person contacts over 6 months. They helped devise action plans for the patients.</p> <p>Peer coaches received €125 for training and €25 per client coached each month.</p> <p>Predominant EPOC intervention type: Patient-centred.</p> <p>Comparison: Usual care.</p> |
| 42 | Wild<br>2016<br>UK    | Supported telemonitoring involving twice-weekly self-measurement of glucose and transmission to a general practitioner | <p>The Telescot Diabetes Trial:</p> <p>Supervised, self-monitoring of glycaemic control, BP, and weight and telemetric transmission of measurements to the general practice team. A research nurse took all the baseline measures. Participants were given advice on lifestyle modification and how to contact the General Practice team.</p> <p>Length. The intervention lasted 9 months with the practice nurses checking patients' results weekly and organising changes in accordance with national guidelines.</p> <p>Predominant EPOC intervention type: Patient-centred</p> <p>Comparison: Usual general practice care</p>                                                                                                                                                                                                                                                                                                                                                                               |

Appendix 4:  
Risk of bias summary

|                       | Allocation concealment (selection bias) | Blinding of participants and personnel (performance bias) | Blinding of outcome assessment (detection bias) | Incomplete outcome data (attrition bias) | Selective reporting (reporting bias) | Other bias |
|-----------------------|-----------------------------------------|-----------------------------------------------------------|-------------------------------------------------|------------------------------------------|--------------------------------------|------------|
| Anzaldo-Campos 2016   | ?                                       | ?                                                         | ?                                               | ?                                        | ?                                    | ?          |
| Basudev 2017          | ?                                       | ?                                                         | ?                                               | ?                                        | ?                                    | ?          |
| Blackberry 2013       | ?                                       | ?                                                         | ?                                               | ?                                        | ?                                    | ?          |
| Capozza 2015          | ?                                       | ?                                                         | ?                                               | ?                                        | ?                                    | ?          |
| Choe 2005             | ?                                       | ?                                                         | ?                                               | ?                                        | ?                                    | ?          |
| Crowley 2015          | ?                                       | ?                                                         | ?                                               | ?                                        | ?                                    | ?          |
| Dale 2009             | ?                                       | ?                                                         | ?                                               | ?                                        | ?                                    | ?          |
| DeFue 2013            | ?                                       | ?                                                         | ?                                               | ?                                        | ?                                    | ?          |
| Edelman 2010          | ?                                       | ?                                                         | ?                                               | ?                                        | ?                                    | ?          |
| Edelman 2015          | ?                                       | ?                                                         | ?                                               | ?                                        | ?                                    | ?          |
| Farmer 2012           | ?                                       | ?                                                         | ?                                               | ?                                        | ?                                    | ?          |
| Forjoh 2014           | ?                                       | ?                                                         | ?                                               | ?                                        | ?                                    | ?          |
| Frosch 2011           | ?                                       | ?                                                         | ?                                               | ?                                        | ?                                    | ?          |
| Guerci 2003           | ?                                       | ?                                                         | ?                                               | ?                                        | ?                                    | ?          |
| Heisler 2010          | ?                                       | ?                                                         | ?                                               | ?                                        | ?                                    | ?          |
| Jacobs 2012           | ?                                       | ?                                                         | ?                                               | ?                                        | ?                                    | ?          |
| Jameson 2010          | ?                                       | ?                                                         | ?                                               | ?                                        | ?                                    | ?          |
| Jvannvir 2004         | ?                                       | ?                                                         | ?                                               | ?                                        | ?                                    | ?          |
| Keogh 2011            | ?                                       | ?                                                         | ?                                               | ?                                        | ?                                    | ?          |
| Kim 2009              | ?                                       | ?                                                         | ?                                               | ?                                        | ?                                    | ?          |
| Krein 2004            | ?                                       | ?                                                         | ?                                               | ?                                        | ?                                    | ?          |
| Long 2012             | ?                                       | ?                                                         | ?                                               | ?                                        | ?                                    | ?          |
| Maislos 2002          | ?                                       | ?                                                         | ?                                               | ?                                        | ?                                    | ?          |
| Mathers 2012          | ?                                       | ?                                                         | ?                                               | ?                                        | ?                                    | ?          |
| McDermott 2015        | ?                                       | ?                                                         | ?                                               | ?                                        | ?                                    | ?          |
| McMahon 2005          | ?                                       | ?                                                         | ?                                               | ?                                        | ?                                    | ?          |
| Mons 2013             | ?                                       | ?                                                         | ?                                               | ?                                        | ?                                    | ?          |
| O'Connor 2014         | ?                                       | ?                                                         | ?                                               | ?                                        | ?                                    | ?          |
| Odegard 2005          | ?                                       | ?                                                         | ?                                               | ?                                        | ?                                    | ?          |
| Palmas 2014           | ?                                       | ?                                                         | ?                                               | ?                                        | ?                                    | ?          |
| Phillis-Tsimikas 2011 | ?                                       | ?                                                         | ?                                               | ?                                        | ?                                    | ?          |
| Polonsky 2011         | ?                                       | ?                                                         | ?                                               | ?                                        | ?                                    | ?          |
| Protheroe 2016        | ?                                       | ?                                                         | ?                                               | ?                                        | ?                                    | ?          |
| Quinn 2011            | ?                                       | ?                                                         | ?                                               | ?                                        | ?                                    | ?          |
| Rothman 2005          | ?                                       | ?                                                         | ?                                               | ?                                        | ?                                    | ?          |
| Schillinger 2009      | ?                                       | ?                                                         | ?                                               | ?                                        | ?                                    | ?          |
| Sen 2014              | ?                                       | ?                                                         | ?                                               | ?                                        | ?                                    | ?          |
| Sugiyama 2015         | ?                                       | ?                                                         | ?                                               | ?                                        | ?                                    | ?          |
| Tano 2013             | ?                                       | ?                                                         | ?                                               | ?                                        | ?                                    | ?          |
| Taylor 2003           | ?                                       | ?                                                         | ?                                               | ?                                        | ?                                    | ?          |
| Thom 2013             | ?                                       | ?                                                         | ?                                               | ?                                        | ?                                    | ?          |
| Wild 2016             | ?                                       | ?                                                         | ?                                               | ?                                        | ?                                    | ?          |

209x278mm (300 x 300 DPI)

## Appendix 5: Overall quality assessment and predominant EPOC intervention type

| Study | Study_ID         | Year | Predominant EPOC intervention type | Overall quality assessment |
|-------|------------------|------|------------------------------------|----------------------------|
| 1     | Anzaldo-Campos   | 2016 | Patient                            | Low-risk                   |
| 2     | Basudev          | 2016 | Organisational                     | Low-risk                   |
| 3     | Blackberry       | 2009 | Patient                            | Low-risk                   |
| 4     | Capozza          | 2015 | Patient                            | Unclear-risk               |
| 5     | Choe             | 2012 | Organisational                     | Unclear-risk               |
| 6     | Crowley          | 2015 | Organisational                     | Low-risk                   |
| 7     | Dale             | 2003 | Patient                            | Unclear-risk               |
| 8     | DePue            | 2011 | Organisational                     | Low-risk                   |
| 9     | Edelman          | 2012 | Organisational                     | Low-risk                   |
| 10    | Edelman15        | 2015 | Organisational                     | Unclear-risk               |
| 11    | Farmer           | 2013 | Organisational                     | Low-risk                   |
| 12    | Forjough         | 2013 | Patient                            | High-risk                  |
| 13    | Frosch           | 2005 | Patient                            | Low-risk                   |
| 14    | Guerci           | 2013 | Patient                            | High-risk                  |
| 15    | Heisler          | 2010 | Patient                            | Unclear-risk               |
| 16    | Jacobs           | 2014 | Organisational                     | High-risk                  |
| 17    | Jameson          | 2011 | Organisational                     | Unclear-risk               |
| 18    | Jovanovic        | 2010 | Organisational                     | Low-risk                   |
| 19    | Keogh            | 2012 | Organisational                     | Low-risk                   |
| 20    | Kim              | 2010 | Patient                            | Low-risk                   |
| 21    | Krein            | 2004 | Organisational                     | Low-risk                   |
| 22    | Long             | 2009 | Patient                            | Unclear-risk               |
| 23    | Maislos          | 2004 | Organisational                     | High-risk                  |
| 24    | Mathers          | 2012 | Professional                       | Low-risk                   |
| 25    | McDermott        | 2015 | Organisational                     | Low-risk                   |
| 26    | McMahon          | 2004 | Organisational                     | Low-risk                   |
| 27    | Mons             | 2005 | Patient                            | Low-risk                   |
| 28    | O'Connor         | 2014 | Organisational                     | Low-risk                   |
| 29    | Odegard          | 2005 | Organisational                     | Unclear-risk               |
| 30    | Palmas           | 2014 | Patient                            | Low-risk                   |
| 31    | Phillis-Tsimikas | 2011 | Patient                            | Unclear-risk               |
| 32    | Polonsky         | 2011 | Patient                            | Unclear-risk               |
| 33    | Protheroe        | 2016 | Organisational                     | Unclear-risk               |
| 34    | Quinn            | 2011 | Patient                            | Low-risk                   |
| 35    | Rothman          | 2005 | Organisational                     | Low-risk                   |
| 36    | Schillinger      | 2009 | Patient                            | Low-risk                   |
| 37    | Sen              | 2014 | Financial                          | Low-risk                   |
| 38    | Sugiyama         | 2015 | Patient                            | Low-risk                   |
| 39    | Tang             | 2013 | Patient                            | Low-risk                   |
| 40    | Taylor           | 2003 | Organisational                     | Unclear-risk               |
| 41    | Thom             | 2013 | Patient                            | Unclear-risk               |
| 41    | Wild             | 2016 | Patient                            | Low-risk                   |

1  
2  
3  
4  
5  
6  
7  
8  
9  
10  
11  
12  
13  
14  
15  
16  
17  
18  
19  
20  
21  
22  
23  
24  
25  
26  
27  
28  
29  
30  
31  
32  
33  
34  
35  
36  
37  
38  
39  
40  
41  
42  
43  
44  
45  
46  
47  
48  
49  
50  
51  
52  
53  
54  
55  
56  
57  
58  
59  
60

**Appendix 6a:**

**Funnel plot of studies included in the HbA1c analysis**

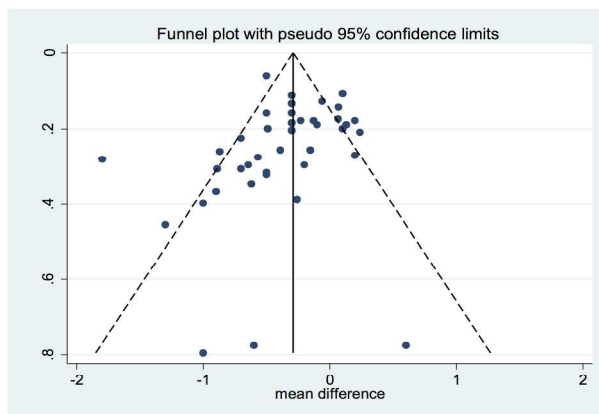

**Funnel plot of studies included in the DBP analysis**

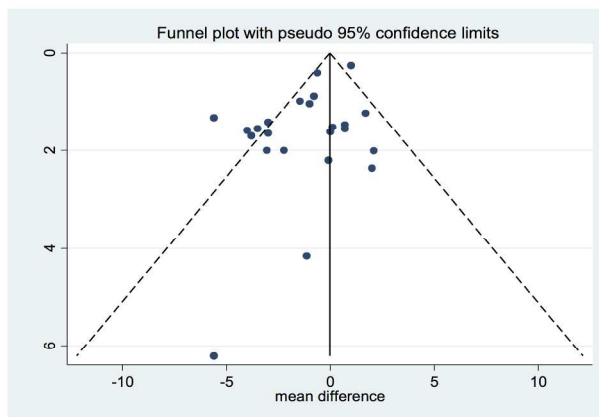

215x279mm (300 x 300 DPI)

1  
2  
3  
4  
5  
6  
7  
8  
9  
10  
11  
12  
13  
14  
15  
16  
17  
18  
19  
20  
21  
22  
23  
24  
25  
26  
27  
28  
29  
30  
31  
32  
33  
34  
35  
36  
37  
38  
39  
40  
41  
42  
43  
44  
45  
46  
47  
48  
49  
50  
51  
52  
53  
54  
55  
56  
57  
58  
59  
60

**Appendix 6b:**

**Funnel plot of studies included in the SBP analysis**



**Funnel plot of studies included in the lipid analysis**

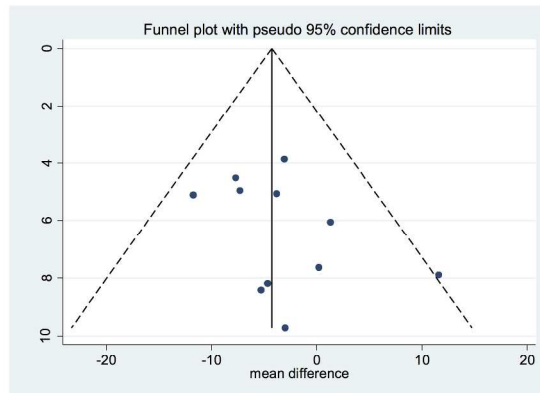

209x297mm (300 x 300 DPI)

1  
2  
3  
4  
5  
6  
7  
8  
9  
10  
11  
12  
13  
14  
15  
16  
17  
18  
19  
20  
21  
22  
23  
24  
25  
26  
27  
28  
29  
30  
31  
32  
33  
34  
35  
36  
37  
38  
39  
40  
41  
42  
43  
44  
45  
46  
47  
48  
49  
50  
51  
52  
53  
54  
55  
56  
57  
58  
59  
60

Appendix 7: Effects of interventions on HbA1c, with TeleHealth subgroups

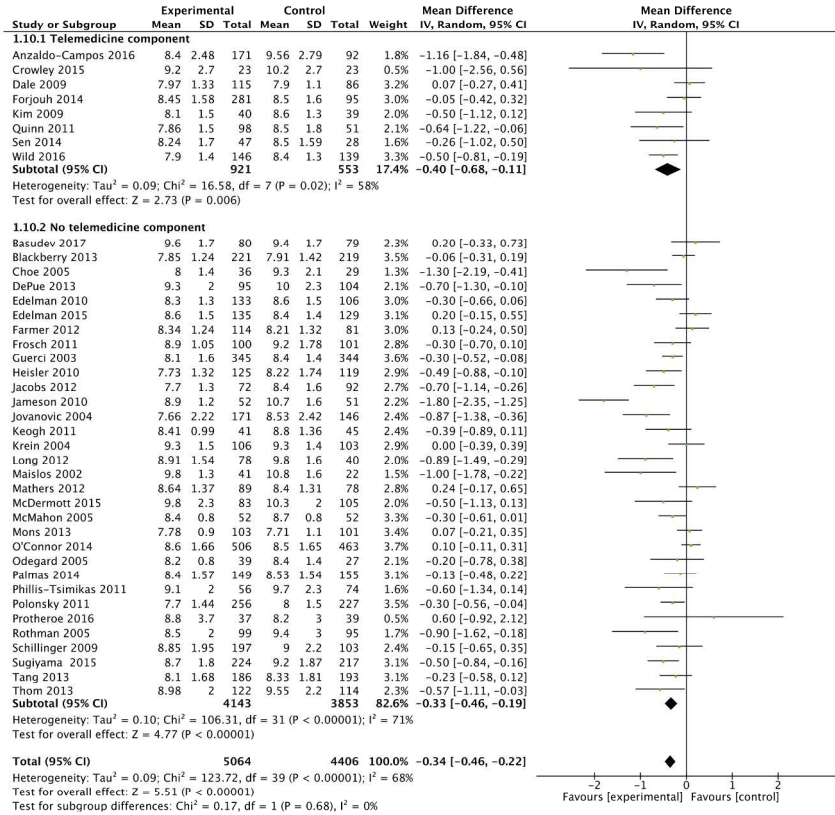

209x278mm (300 x 300 DPI)

1  
2  
3  
4  
5  
6  
7  
8  
9  
10  
11  
12  
13  
14  
15  
16  
17  
18  
19  
20  
21  
22  
23  
24  
25  
26  
27  
28  
29  
30  
31  
32  
33  
34  
35  
36  
37  
38  
39  
40  
41  
42  
43  
44  
45  
46  
47  
48  
49  
50  
51  
52  
53  
54  
55  
56  
57  
58  
59  
60

**Appendix 8: Effects of interventions on systolic blood pressure**



209x278mm (300 x 300 DPI)



1  
2  
3  
4  
5  
6  
7  
8  
9  
10  
11  
12  
13  
14  
15  
16  
17  
18  
19  
20  
21  
22  
23  
24  
25  
26  
27  
28  
29  
30  
31  
32  
33  
34  
35  
36  
37  
38  
39  
40  
41  
42  
43  
44  
45  
46  
47  
48  
49  
50  
51  
52  
53  
54  
55  
56  
57  
58  
59  
60

**Appendix 9: Effects of interventions on diastolic blood pressure**



209x278mm (300 x 300 DPI)

1  
2  
3  
4  
5  
6  
7  
8  
9  
10  
11  
12  
13  
14  
15  
16  
17  
18  
19  
20  
21  
22  
23  
24  
25  
26  
27  
28  
29  
30  
31  
32  
33  
34  
35  
36  
37  
38  
39  
40  
41  
42  
43  
44  
45  
46  
47  
48  
49  
50  
51  
52  
53  
54  
55  
56  
57  
58  
59  
60

**Appendix 10: Effects of interventions on Total Cholesterol**



209x278mm (300 x 300 DPI)

## Appendix 11: Secondary outcomes measured and results

| Number | Study           | Mental health outcomes                                                                                                                                                                                    | Psychosocial outcomes                                                                                                                                                                                                                                                                                                                                                                                                                                                                                                                                                                                                                                                                                                                                                                                                                                                                                              | Adherence outcomes | Other physical outcomes                                                                                                                                                                                                                                                                                                                                                                                                               | Healthcare utilisation outcomes | Medication related outcomes                             |
|--------|-----------------|-----------------------------------------------------------------------------------------------------------------------------------------------------------------------------------------------------------|--------------------------------------------------------------------------------------------------------------------------------------------------------------------------------------------------------------------------------------------------------------------------------------------------------------------------------------------------------------------------------------------------------------------------------------------------------------------------------------------------------------------------------------------------------------------------------------------------------------------------------------------------------------------------------------------------------------------------------------------------------------------------------------------------------------------------------------------------------------------------------------------------------------------|--------------------|---------------------------------------------------------------------------------------------------------------------------------------------------------------------------------------------------------------------------------------------------------------------------------------------------------------------------------------------------------------------------------------------------------------------------------------|---------------------------------|---------------------------------------------------------|
| 1      | Anzaoldo-Campos | Depression (PHQ-9): Unclear of MD between two intervention groups (PD or PD-TE groups) and control group. Unadjusted MD was -1.83 favouring the PD group to control and -1.84 for PD-TE group to control. | <p>Self efficacy (Spanish Self-Efficacy): Unclear of MD between two intervention groups (PD or PD-TE groups) and control group. Unadjusted MD was -2.42 favouring the PD group to control and -0.54 for PD-TE group compared to control.</p> <p>Lifestyle (IMEVID): Unclear of MD between two intervention groups (PD or PD-TE groups) and control group. Unadjusted MD was 2.3 favouring the PD group to control and 2.7 favouring the PD-TE group to control.</p> <p>Quality of life (Diabetes 39): Unclear of MD between two intervention groups (PD or PD-TE groups) and control group. Unadjusted MD was -8.88 favouring the PD group to control and -4.87 favouring the PD-TE group to control.</p> <p>Diabetes knowledge (DKQ24): Unclear of MD between two intervention groups (PD or PD-TE groups) and control group. Unadjusted MD was 2.05 favouring the PD group to control and 2.09 favouring the</p> |                    | <p>Triacylglyceride: Unclear of MD between two intervention groups (PD or PD-TE groups) and control group.. Unadjusted MD was -21.46 favouring the PD group to control and -4.55 for PD-TE group compared to control.</p> <p>BMI: Unclear of MD between two intervention groups (PD or PD-TE groups) and control group.. Unadjusted MD was +0.33 comparing the PD group to control and +0.31 for PD-TE group compared to control.</p> |                                 | Significantly higher insulin use in PD and PD-TE groups |

|   |            |                                                    |                                                                                                                                                                                                   |  |                                             |                                                                                                                                                                                                                              |                                                                                                                                                                                                                   |
|---|------------|----------------------------------------------------|---------------------------------------------------------------------------------------------------------------------------------------------------------------------------------------------------|--|---------------------------------------------|------------------------------------------------------------------------------------------------------------------------------------------------------------------------------------------------------------------------------|-------------------------------------------------------------------------------------------------------------------------------------------------------------------------------------------------------------------|
|   |            |                                                    | PD-TE group to control.                                                                                                                                                                           |  |                                             |                                                                                                                                                                                                                              |                                                                                                                                                                                                                   |
| 2 | Basudev    |                                                    |                                                                                                                                                                                                   |  | Weight MD 0 (p = NS)<br>eGFR -3.9 (p = 0.1) | Care destination: NS change<br><br>Frequency of contact: NS change                                                                                                                                                           | Medication change: 54% of intervention group had a change in glycaemic medication versus 46% in the control group (p=0.04). No other significant change in medications.<br><br>Medication optimization: NS change |
| 3 | Blackberry | Major depression<br>1.09 (0.49 to 2.46)<br>p= 0.83 | Quality of life 0.02 (CI -0.01 to 0.05) p =0.16<br><br>Diabetes self efficacy -0.06 (CI - 2.22 to 2.10) p 0.96<br><br>Diabetes support -0.09 (CI - 0.01 to 0.18) p 0.08                           |  |                                             |                                                                                                                                                                                                                              |                                                                                                                                                                                                                   |
| 4 | Capozza    |                                                    | Patient interaction and satisfaction (CSQ8) with the program by means of survey-intervention patients all scoring over 3 on a four point satisfaction scale. No clear comparison with usual care. |  |                                             |                                                                                                                                                                                                                              |                                                                                                                                                                                                                   |
| 5 | Choe       |                                                    |                                                                                                                                                                                                   |  |                                             | Process measures:<br>(% before, % after, p value)<br><br>Rate of HbA1c measurement: 82.9% 92.3% 0.21<br><br>Dilated retinal examination: 74.3% 97.3% p= 0.004<br><br>Urine ACR or use of ACE Inhibitors: 85.7% 94.9% p= 0.18 |                                                                                                                                                                                                                   |

|   |         |                                                          |                                                                                                                                                                                                                                                                                                                                                                                                                                                                                                                                                                                                                                            |                                                                                                      |                                                                                                                                                                                                                                                                                                                                                                                |                                                                                                  |  |
|---|---------|----------------------------------------------------------|--------------------------------------------------------------------------------------------------------------------------------------------------------------------------------------------------------------------------------------------------------------------------------------------------------------------------------------------------------------------------------------------------------------------------------------------------------------------------------------------------------------------------------------------------------------------------------------------------------------------------------------------|------------------------------------------------------------------------------------------------------|--------------------------------------------------------------------------------------------------------------------------------------------------------------------------------------------------------------------------------------------------------------------------------------------------------------------------------------------------------------------------------|--------------------------------------------------------------------------------------------------|--|
|   |         |                                                          |                                                                                                                                                                                                                                                                                                                                                                                                                                                                                                                                                                                                                                            |                                                                                                      |                                                                                                                                                                                                                                                                                                                                                                                | Monofilament testing for diabetic neuropathy by chart review over 24 months: 62.9% 92.3% p=0.002 |  |
| 6 | Crowley | Depression (PHQ-9): mean difference was not significant. | Diabetes self-management (Self-care inventory revised) SCI-R: mean difference was +7.0 (p=0.047) in favour of intervention                                                                                                                                                                                                                                                                                                                                                                                                                                                                                                                 | Self reported medication adherence (Morisky medication adherence scale 4): nonsignificant difference |                                                                                                                                                                                                                                                                                                                                                                                | Adverse events similar in both groups                                                            |  |
| 7 | Dale    |                                                          | <p>Diabetes distress (PAID) adjusted score showed no significant difference for two intervention groups versus control.</p> <p>Self efficacy (DMSES) adjusted score showed no significant difference for two intervention groups versus control.<br/>PS-CG, +4.17, p=0.28<br/>DSN-CG, +0.38, p=0.94.</p> <p>Self efficacy (DMSES) improved for the patients in the peer support group but there were no significant differences between groups; diabetes related problems (PAID) reduced for those in the diabetes nurse specialists group. In all groups the HbA1c improved, but there were no significant differences between groups</p> |                                                                                                      | <p>Normal ACR: 1.05 (0.62 to 1.75) p= 0.87</p> <p>Normal eGFR: 0.92 (0.55 to 1.53) p 0.76</p> <p>Current smoker 0.043 (0.55 to 1.53) p 0.72</p> <p>Healthy weight (BMI&lt;25) 2.19 (1.1 to 4.38) p=0.03</p> <p>Weight 0.12 (-1.53 to 1.77) p=0.89</p> <p>Waist circumference Men 0.90 (-1.40 to 3.19) p=0.44</p> <p>Waist circumference Women -1.52 (-4.08 to 1.04) p=0.24</p> |                                                                                                  |  |
| 8 | DePue   |                                                          | Mean perceived competence score significant difference 1.6 (CI: 0.9 to 2.4) p< 0.001                                                                                                                                                                                                                                                                                                                                                                                                                                                                                                                                                       | Adherence: self reported medication adherence                                                        |                                                                                                                                                                                                                                                                                                                                                                                |                                                                                                  |  |

|    |              |  |                                                                                                                                                                                                                                                                                                                           |                                                                                                                                      |                                                         |                                                                                                             |                                                                                                                                                                                                                                         |
|----|--------------|--|---------------------------------------------------------------------------------------------------------------------------------------------------------------------------------------------------------------------------------------------------------------------------------------------------------------------------|--------------------------------------------------------------------------------------------------------------------------------------|---------------------------------------------------------|-------------------------------------------------------------------------------------------------------------|-----------------------------------------------------------------------------------------------------------------------------------------------------------------------------------------------------------------------------------------|
|    |              |  | Physical activity Adapted measures of diabetes beliefs; no data reported.                                                                                                                                                                                                                                                 | Nonsignificant difference.                                                                                                           |                                                         |                                                                                                             |                                                                                                                                                                                                                                         |
| 9  | Edelman 2010 |  | Self-efficacy using the Perceived Competence Scale<br><br>Nonsignificant difference                                                                                                                                                                                                                                       | Adherence to medications ???<br>Morisky self-reported medication adherence scale<br><br>Nonsignificant difference                    | BMI nonsignificant differences                          | Adverse events through structured self report and medical record review<br>Health utilization Cost data     |                                                                                                                                                                                                                                         |
| 10 | Edelman 2015 |  | Self-efficacy- but no report in Results section<br>Health literacy- but no report in Results section.                                                                                                                                                                                                                     | Medication adherence (via self report) - but no report in Results section.                                                           | No significant differences weight or physical activity. | 45.2% of intervention group had GP management plan for diabetes V's 35.5% of controls (non-significant)     |                                                                                                                                                                                                                                         |
| 11 | Farmer       |  | Functional status as per SF 12<br><br>Physical and SF 12 Mental Diabetes treatment satisfaction and satisfaction with nurse<br><br><u>SF 12 Physical</u><br>46.3 (9.0) V's 44.6 (11.1)<br><br>MD -0.7 (CI -2.7, 1.4) p = 0.52<br><br><u>SF 12 Mental</u><br>49.5 (10.4) V's 52.6 (8.8)<br>MD -1.6 (CI -3.9, 0.6) p = 0.15 | MARS Self reported adherence (range 5-25) with a higher score indicating higher levels of adherence<br><br>Nonsignificant difference | BMI dietary nonsignificant difference.                  | % reporting hypoglycaemia nonsignificant difference<br><br>Treatment satisfaction nonsignificant difference | Primary outcome<br>% days over a 12 week period on which the correct number of doses of main glucose lowering medication was taken each day as prescribed.<br><br>77.4% (26.3) & days taking correct dose V's 69% = 8.4% MD (P = 0.044) |
| 12 | Forjough     |  | Self care data not given                                                                                                                                                                                                                                                                                                  |                                                                                                                                      |                                                         |                                                                                                             |                                                                                                                                                                                                                                         |
| 13 | Frosch       |  | Diabetes knowledge: (23 point Diabetes knowledge test) - nonsignificant difference.<br><br>Self-care behaviours (SDSCA) - nonsignificant difference                                                                                                                                                                       |                                                                                                                                      |                                                         |                                                                                                             | Prescribed medications measured: taking most prescribed medications (P = .01; interaction, P = .41), and taking all prescribed medications (P .001; interaction, P=.75).                                                                |

|    |           |  |                                                                                                                                                                                                                       |                                                                                                                                                              |                                                                                                |                                                                                                            |                                                                                                                                       |
|----|-----------|--|-----------------------------------------------------------------------------------------------------------------------------------------------------------------------------------------------------------------------|--------------------------------------------------------------------------------------------------------------------------------------------------------------|------------------------------------------------------------------------------------------------|------------------------------------------------------------------------------------------------------------|---------------------------------------------------------------------------------------------------------------------------------------|
|    |           |  | Diabetes knowledge and behavioural outcomes by group over time: Exercise was statistically significantly reduced                                                                                                      |                                                                                                                                                              |                                                                                                |                                                                                                            | Nonsignificant difference.                                                                                                            |
| 14 | Guerci    |  |                                                                                                                                                                                                                       |                                                                                                                                                              |                                                                                                | Symptomatic hyoglycaemia<br>Any hypoglycaemia: 53 (10.4%) in SMBG and 25 (5.2%) in control p= 0.003        | Medications nonsignificant difference                                                                                                 |
| 15 | Heisler   |  | Diabetes social support score - nonsignificant difference<br><br>Diabetes distress Diabetes QoL -nonsignificant difference                                                                                            | Medication adherence nonsignificant difference<br><br>Medication intensification: Significant increase in insulin and oral diabetic medication prescribing . | BMI nonsignificant difference                                                                  |                                                                                                            | Medication intensification: Significant increase in insulin and oral diabetic medication prescribing .                                |
| 16 | Jacobs    |  |                                                                                                                                                                                                                       |                                                                                                                                                              | Weight and diet nonsignificant difference                                                      | Intervention group had more screening parameters performed (retinal screening, nephropathy and neuropathy) | Medication sse; intervention group had higher use of antiplatelet, diabetic and statin medications.                                   |
| 17 | Jameson   |  |                                                                                                                                                                                                                       |                                                                                                                                                              |                                                                                                |                                                                                                            | Intervention group- 28.8% commenced basal bolus insulin V's 1 (2%) patient in the control group.                                      |
| 18 | Jovanovic |  |                                                                                                                                                                                                                       |                                                                                                                                                              | HbA1c < 7%<br>35% V's 21% (but p = 0105)                                                       |                                                                                                            | Medication usage Increase in oral agents in intervention group, without any increase in numbers on insulin. Control group- no change. |
| 19 | Keogh     |  | The intervention group reported better personal control, a better understanding of diabetes and an increased belief in treatment effectiveness. They also had fewer symptoms and lower levels of diabetes concern and |                                                                                                                                                              | Statistically more patients in intervention group achieved at least 1.0% improvement in HbA1c. |                                                                                                            |                                                                                                                                       |

1  
2  
3  
4  
5  
6  
7  
8  
9  
10  
11  
12  
13  
14  
15  
16  
17  
18  
19  
20  
21  
22  
23  
24  
25  
26  
27  
28  
29  
30  
31  
32  
33  
34  
35  
36  
37  
38  
39  
40  
41  
42  
43  
44  
45  
46  
47

|    |     |                                                                                                                                                                                   |                                                                                                                                                                                                                                                                                                                                                                                                                                                                                                                                                                                                                                                  |  |                                                                                                                                                                                                                                                    |  |
|----|-----|-----------------------------------------------------------------------------------------------------------------------------------------------------------------------------------|--------------------------------------------------------------------------------------------------------------------------------------------------------------------------------------------------------------------------------------------------------------------------------------------------------------------------------------------------------------------------------------------------------------------------------------------------------------------------------------------------------------------------------------------------------------------------------------------------------------------------------------------------|--|----------------------------------------------------------------------------------------------------------------------------------------------------------------------------------------------------------------------------------------------------|--|
|    |     |                                                                                                                                                                                   | <p>distress. They also had better psychological well being, adherence to lifestyle factors, self efficacy and family support.</p> <p>Illness perceptions (Brief illness Perception Questionnaire)- statistically significant improvement</p> <p>Psychological wellbeing (12-item Well-Being questionnaire)- statistically significant improvement</p> <p>Diabetes self management (Summary of Diabetes Self-care Activities Questionnaire) Self Efficacy (UK version Diabetes Self-Efficacy Scale)- statistically significant improvement</p> <p>Family support (Diabetes Family Behaviour Checklist)- statistically significant improvement</p> |  |                                                                                                                                                                                                                                                    |  |
| 20 | Kim | <p>Depression (Kim Depression Scale for Korean Americans) nonsignificant difference</p> <p>Quality of Life (Diabetes Quality of Life Measure (DQOL) nonsignificant difference</p> | <p>Diabetes knowledge test (DKT) statistically significant difference</p> <p>Self efficacy (Stanford Chronic Disease Self-Efficacy scale) statistically significant difference</p> <p>Self care (Diabetes self care activitiis (SDSCA) statistically significant difference</p>                                                                                                                                                                                                                                                                                                                                                                  |  | <p>% participants achieving HbA1c goals</p> <p>% participants achieving HbA1c goals &amp; achieving HbA1c less 6.5, 7 and 7.5 greater in intervention group (Fig 3). statistically significant. But data not shown.</p> <p>BMI- nonsignificant</p> |  |



|    |         |  |                                                                                                                                                                                                                                                                                                                                                                                                                                                             |  |                               |                                                                                                                                                                                       |                                                                                   |
|----|---------|--|-------------------------------------------------------------------------------------------------------------------------------------------------------------------------------------------------------------------------------------------------------------------------------------------------------------------------------------------------------------------------------------------------------------------------------------------------------------|--|-------------------------------|---------------------------------------------------------------------------------------------------------------------------------------------------------------------------------------|-----------------------------------------------------------------------------------|
|    |         |  |                                                                                                                                                                                                                                                                                                                                                                                                                                                             |  | difference                    |                                                                                                                                                                                       |                                                                                   |
| 21 | Krein   |  | General satisfaction score and rating of diabetes provider score was marginally better and statistically better in the intervention group.                                                                                                                                                                                                                                                                                                                  |  | BMI nonsignificant difference |                                                                                                                                                                                       |                                                                                   |
| 22 | Long    |  |                                                                                                                                                                                                                                                                                                                                                                                                                                                             |  | BMI nonsignificant difference | Uptake of intervention<br>Peer mentoring: Aiming to have 4 calls per month for 6 months. The Results showed 38% mentors talked 4 times per month and by Month 6, that reduced to 16%. | No difference in hypoglycaemia                                                    |
| 23 | Maisios |  |                                                                                                                                                                                                                                                                                                                                                                                                                                                             |  |                               | Adherence to follow up: 41/48 and 23/34 patients returned for follow up. 29% intervention group non-compliant.                                                                        | Use of insulin nonsignificant difference<br>INT: 25% to 40%<br>CONTROL: 15 to 17% |
| 24 | Mathers |  | Decisional conflict:<br><br>Mean difference between intervention and control groups on the total score for decisional conflict on the total score was -7.72 (CI -12.5, -2.97)<br><br>Realistic expectations: Were better in intervention group<br><br>Preferred option: - Proportion undecided: No significant difference<br><br>Participation in decision-making: Statistically significant difference, intervention group had higher participation rates. |  |                               |                                                                                                                                                                                       |                                                                                   |

|    |           |                                                                                       |                                                                                                                                                                                         |                                                                                                                                                                                                                                          |                                                                                       |                                                                                                                                                             |                                                                         |
|----|-----------|---------------------------------------------------------------------------------------|-----------------------------------------------------------------------------------------------------------------------------------------------------------------------------------------|------------------------------------------------------------------------------------------------------------------------------------------------------------------------------------------------------------------------------------------|---------------------------------------------------------------------------------------|-------------------------------------------------------------------------------------------------------------------------------------------------------------|-------------------------------------------------------------------------|
|    |           |                                                                                       | Regret score. No significant difference.                                                                                                                                                |                                                                                                                                                                                                                                          |                                                                                       |                                                                                                                                                             |                                                                         |
|    |           |                                                                                       | Acceptability: Most found PDA useful.                                                                                                                                                   |                                                                                                                                                                                                                                          |                                                                                       |                                                                                                                                                             |                                                                         |
| 25 | McDermott |                                                                                       | Test of Functional Health Literacy for Adults (TOFHLA)- unclear if significant result present<br>Assessment of Quality of Life (AQoL) instrument- unclear if significant result present | Waitlist patients had better self-report adherence<br>Adherence: SS reduction                                                                                                                                                            | Slight non-significant reductions in rest of other physical outcomes (BMI, ACR, eGFR) | Intervention group patients statistically significantly more likely to have seen a dietician and dentist, be taking inculin and have influenza vaccination. |                                                                         |
| 26 | McMahon   |                                                                                       |                                                                                                                                                                                         |                                                                                                                                                                                                                                          |                                                                                       | Frequency of data uploads on web-based care management system (used to look at effect on HbA1c primary outcome)                                             |                                                                         |
| 27 | Mons      | Symptoms of depression: Geriatric depression scale GDS: No difference between groups. | Health related quality of life (Short Form General Health Survey: SF-12)<br>No difference <u>between</u> groups at 12 months.<br>Statistically significant change at 18 months.         |                                                                                                                                                                                                                                          |                                                                                       |                                                                                                                                                             |                                                                         |
| 28 | O'Connor  |                                                                                       |                                                                                                                                                                                         | No significant difference between groups regarding medication adherence (one prescription fill within 60 days of prescription date)- 88% in intervention group vs 86% in control group.<br>Similarly there was no significant difference |                                                                                       |                                                                                                                                                             | Medication persistence (two or more prescription fills within 180 days) |

|    |                  |                                                                                                                       |                                                                                                                      |                                                                                                  |  |                                                                                                                                                                                                                                                                                                                                                                                                                                                                               |                                                                                |
|----|------------------|-----------------------------------------------------------------------------------------------------------------------|----------------------------------------------------------------------------------------------------------------------|--------------------------------------------------------------------------------------------------|--|-------------------------------------------------------------------------------------------------------------------------------------------------------------------------------------------------------------------------------------------------------------------------------------------------------------------------------------------------------------------------------------------------------------------------------------------------------------------------------|--------------------------------------------------------------------------------|
|    |                  |                                                                                                                       |                                                                                                                      | between groups regarding medication persistence (two or more prescription fills within 180 days) |  |                                                                                                                                                                                                                                                                                                                                                                                                                                                                               |                                                                                |
| 29 | Odegard          |                                                                                                                       |                                                                                                                      | No improvement on self reported adherence.                                                       |  |                                                                                                                                                                                                                                                                                                                                                                                                                                                                               | No significant difference in MAI (medication appropriateness) at end of study. |
| 30 | Palmas           |                                                                                                                       |                                                                                                                      |                                                                                                  |  |                                                                                                                                                                                                                                                                                                                                                                                                                                                                               |                                                                                |
| 31 | Phillis-Tsimikas | Self management behaviours and Depression (in separate publication) - not published at time of search so not included | Self management behaviours and Depression (in separate publication)- not published at time of search so not included |                                                                                                  |  |                                                                                                                                                                                                                                                                                                                                                                                                                                                                               |                                                                                |
| 32 | Polonsky         |                                                                                                                       | GWB WHO-5 - nonsignificant difference                                                                                |                                                                                                  |  | <p>Treatment intensification</p> <p>Changes in treatment: 75.5% of STG patients received a medication change at month 1 V's 28% of ACG patients (p &lt;0.0001).</p> <p>Twice as many STB patients started on insulin between month 1 and 12. Heightened attention paid to subjects.</p> <p>Free meters: Requirement to bring meters to all study visits</p> <p>More frequent study visits<br/>STG physicians trained on a treatment algorithm<br/>SMBG: Lower test use in</p> |                                                                                |

1  
2  
3  
4  
5  
6  
7  
8  
9  
10  
11  
12  
13  
14  
15  
16  
17  
18  
19  
20  
21  
22  
23  
24  
25  
26  
27  
28  
29  
30  
31  
32  
33  
34  
35  
36  
37  
38  
39  
40  
41  
42  
43  
44  
45  
46  
47

|    |             |                                                                                                                                                                      |                                                                                                                                                                                                                                                                                                                                                                                                                                                  |  |                                          |                                                                                                                                                                                                                                                                      |  |
|----|-------------|----------------------------------------------------------------------------------------------------------------------------------------------------------------------|--------------------------------------------------------------------------------------------------------------------------------------------------------------------------------------------------------------------------------------------------------------------------------------------------------------------------------------------------------------------------------------------------------------------------------------------------|--|------------------------------------------|----------------------------------------------------------------------------------------------------------------------------------------------------------------------------------------------------------------------------------------------------------------------|--|
|    |             |                                                                                                                                                                      |                                                                                                                                                                                                                                                                                                                                                                                                                                                  |  |                                          | STG group (0.77) V's ACG group 1.05 (nonsignificant difference)                                                                                                                                                                                                      |  |
| 33 | Protheroe   | Warwick- Edinburgh Mental Well-Being: Adjusted MD was -0.17 (p=0.87)<br><br>Health Status Measure (from Sf12) Adjusted MD for mental health score was 5.46 (p=0.049) | Diabetes self care (Summary of Diabetes Self-Care Activities Measure) : Adjusted MD was 0.33 (p=0.2)<br><br>Diabetes Quality of Life (Diabetes Quality of Life Inventory) : Adjusted MD was -4.24 (p=0.46)<br><br>Diabetes UK Scale Items: Adjusted MD was 0.4 (p=0.22)<br><br>Health-related Quality of Life (EQ5D) : Adjusted MD was 0.1 (p=0.135)<br><br>Illness Perception (Brief Illness Perception Score) : Adjusted MD was -5.74 (p=0.04) |  |                                          | No significant difference in resource use (inpatient nights, Emergency Department visits, Outpatient visits, GP visits or practice nurse visits)                                                                                                                     |  |
| 34 | Quinn       | PHQ-9 depression - nonsignificant difference                                                                                                                         | Diabetes distress scale - nonsignificant difference<br><br>Diabetes diabetes inventory - nonsignificant difference                                                                                                                                                                                                                                                                                                                               |  | BMI unclear if statistically significant | Hypoglycaemic events and hospitalizations were infrequent in all groups.                                                                                                                                                                                             |  |
| 35 | Rothman     |                                                                                                                                                                      | Diabetes knowledge Satisfaction:<br><br>(Diabetes Treatment Satisfaction Questionnaire) MD in scores (INT V's control)<br><br>Diabetes knowledge: +14 (CI 9 to 20)<br><br>Diabetes treatment satisfaction +3 (CI 1 to 6) statistically significant reduction                                                                                                                                                                                     |  |                                          | Process measures (time spent with patients) and medication changes. But did not factor in any changes made by PCP. Aspirin use higher in intervention group at 12 months. Statin use equal. No statistically significant increase in services in intervention group. |  |
| 36 | Schillinger |                                                                                                                                                                      | SF-12 instrument for QoL                                                                                                                                                                                                                                                                                                                                                                                                                         |  |                                          | Functional outcomes:                                                                                                                                                                                                                                                 |  |

|    |     |  |                                                                                                                                                                                                                                                                                                                                                                                                                                                                                                                                               |  |  |                                                                                                                                                                                                                                                                                                                                |  |
|----|-----|--|-----------------------------------------------------------------------------------------------------------------------------------------------------------------------------------------------------------------------------------------------------------------------------------------------------------------------------------------------------------------------------------------------------------------------------------------------------------------------------------------------------------------------------------------------|--|--|--------------------------------------------------------------------------------------------------------------------------------------------------------------------------------------------------------------------------------------------------------------------------------------------------------------------------------|--|
|    |     |  | <p>nonsignificant difference</p> <p>Patient assessment of chronic illness care (PACIC) score out of 100</p> <p>Statistically significant difference ATSM +12.2 V's control GVC +12.6 V's control<br/>Data present</p> <p>Diabetes Quality Improvement Program (100 score)</p> <p>Self management behavior statistically significant difference ATSM +0.6 V's control GVC +0.3 V's control<br/>Data present</p> <p>Diabetes self efficacy statistically significant difference ATSM +6.0 V's control GVC +5.5 V's control<br/>Data present</p> |  |  | <p>Bed days: ATSM significant reduction</p> <p>Restricted activity, ATSM significant improvement</p> <p><b><u>Interpersonal Processes of Care</u></b> for Diverse Populations (IPC) instrument to capture reports of provider's communication. Statistically significant difference ATSM +9.0 V's control</p>                  |  |
| 37 | Sen |  |                                                                                                                                                                                                                                                                                                                                                                                                                                                                                                                                               |  |  | <p>Primary outcome was adherence to biometric tests:</p> <p>At three months; total adherence rates were 81% in the low incentive arm V's 58% in control (p 0.007) and 77% in high incentive arm V's 58% (p0.02).</p> <p>No difference between the incentive arms.</p> <p>But no difference in the high incentive group V's</p> |  |

1  
2  
3  
4  
5  
6  
7  
8  
9  
10  
11  
12  
13  
14  
15  
16  
17  
18  
19  
20  
21  
22  
23  
24  
25  
26  
27  
28  
29  
30  
31  
32  
33  
34  
35  
36  
37  
38  
39  
40  
41  
42  
43  
44  
45  
46  
47

1  
2  
3  
4  
5  
6  
7  
8  
9  
10  
11  
12  
13  
14  
15  
16  
17  
18  
19  
20  
21  
22  
23  
24  
25  
26  
27  
28  
29  
30  
31  
32  
33  
34  
35  
36  
37  
38  
39  
40  
41  
42  
43  
44  
45  
46  
47

|    |          |                                                                                                                                                               |                                                                                                                                                                                                                                   |  |                                                   |                                                                                                                                                                                               |                                                                                                                                                                                                                      |
|----|----------|---------------------------------------------------------------------------------------------------------------------------------------------------------------|-----------------------------------------------------------------------------------------------------------------------------------------------------------------------------------------------------------------------------------|--|---------------------------------------------------|-----------------------------------------------------------------------------------------------------------------------------------------------------------------------------------------------|----------------------------------------------------------------------------------------------------------------------------------------------------------------------------------------------------------------------|
|    |          |                                                                                                                                                               |                                                                                                                                                                                                                                   |  |                                                   | control at month 6 (at 3 month post intervention follow up)..<br><br>But the low incentive group still had significant improvement in adherence at month 6 Vs control (62% V's 27%, p 0.002). |                                                                                                                                                                                                                      |
| 38 | Sugiyama | Change Mental Component Summary Score (MCS-12) from the SF-12: A mean difference of +1.6 between intervention and control which was statistically significant | Secondary outcomes: Social support score from the Diabetes Care Profile: non-significant change                                                                                                                                   |  |                                                   |                                                                                                                                                                                               |                                                                                                                                                                                                                      |
| 39 | Tang     |                                                                                                                                                               | Satisfaction/ Psychosocial wellbeing<br><br>Intervention group had higher treatment satisfaction (statistically significant) and lower treatment distress scores. Other scales of diabetes distress had no change between groups. |  | BMI nonsignificant difference                     | Healthcare utilisation - nonsignificant difference in total physician visits.                                                                                                                 | Significant increase in new medications started and insulin commencement in intervention group. Patients already on insulin- the intervention group had a statistically significant higher number of dose increases. |
| 40 | Taylor   |                                                                                                                                                               | Psychosocial (SF 26 for QoL and Duke Activity Status):<br><br>Nonsignificant difference in psychological variables Patient and physician satisfaction nonsignificant difference                                                   |  |                                                   | Medical utilization (physician visits) nonsignificant difference in physician or ED visits                                                                                                    |                                                                                                                                                                                                                      |
| 41 | Thom     |                                                                                                                                                               |                                                                                                                                                                                                                                   |  | 10-year framingham risk nonsignificant difference |                                                                                                                                                                                               |                                                                                                                                                                                                                      |

|    |      |                                                                                                                            |                                                                                                                                                                                                                                                      |                      |                                                                                                                                                                     |                                                                                   |                                                                                                                                                                                    |
|----|------|----------------------------------------------------------------------------------------------------------------------------|------------------------------------------------------------------------------------------------------------------------------------------------------------------------------------------------------------------------------------------------------|----------------------|---------------------------------------------------------------------------------------------------------------------------------------------------------------------|-----------------------------------------------------------------------------------|------------------------------------------------------------------------------------------------------------------------------------------------------------------------------------|
| 42 | Wild | EQ-5D index:<br>Adjusted MD was 0.00 (non-significant)<br><br>Total HADS score:<br>Adjusted MD was -0.31 (non-significant) | Self-efficacy: Adjusted MD was +0.69 (non-significant)<br><br>Self-reported total physical activity score (IPAQ): Adjusted MD was -467.31 (non-significant)<br><br>Diabetes Knowledge (first 14 items only): Adjusted MD was +0.04 (non-significant) | Medication adherence | Weight: adjusted MD supporting telemonitoring group - 0.35 (p = 0.6)<br><br>No significant differences in alcohol use, smoking, or urinary sodium/creatinine ratio. | Greater number of telephone calls in intervention group (rate ratio 7.5 p<0.0001) | No significant change in use of insulin or other medications (from Supplementary File 1).<br><br>No change in forgetfulness taking medications or carelessness taking medications. |
|----|------|----------------------------------------------------------------------------------------------------------------------------|------------------------------------------------------------------------------------------------------------------------------------------------------------------------------------------------------------------------------------------------------|----------------------|---------------------------------------------------------------------------------------------------------------------------------------------------------------------|-----------------------------------------------------------------------------------|------------------------------------------------------------------------------------------------------------------------------------------------------------------------------------|



# PRISMA 2009 Checklist

1  
2  
3  
4  
5  
6  
7  
8  
9  
10  
11  
12  
13  
14  
15  
16  
17  
18  
19  
20  
21  
22  
23  
24  
25  
26  
27  
28  
29  
30  
31  
32  
33  
34  
35  
36  
37  
38  
39  
40  
41  
42  
43  
44  
45  
46  
47  
48  
49

| Section/topic                      | #  | Checklist item                                                                                                                                                                                                                                                                                              | Reported on page # |
|------------------------------------|----|-------------------------------------------------------------------------------------------------------------------------------------------------------------------------------------------------------------------------------------------------------------------------------------------------------------|--------------------|
| <b>TITLE</b>                       |    |                                                                                                                                                                                                                                                                                                             |                    |
| Title                              | 1  | Identify the report as a systematic review, meta-analysis, or both.                                                                                                                                                                                                                                         | 1                  |
| <b>ABSTRACT</b>                    |    |                                                                                                                                                                                                                                                                                                             |                    |
| Structured summary                 | 2  | Provide a structured summary including, as applicable: background; objectives; data sources; study eligibility criteria, participants, and interventions; study appraisal and synthesis methods; results; limitations; conclusions and implications of key findings; systematic review registration number. | 3                  |
| <b>INTRODUCTION</b>                |    |                                                                                                                                                                                                                                                                                                             |                    |
| Rationale                          | 3  | Describe the rationale for the review in the context of what is already known.                                                                                                                                                                                                                              | 6                  |
| Objectives                         | 4  | Provide an explicit statement of questions being addressed with reference to participants, interventions, comparisons, outcomes, and study design (PICOS).                                                                                                                                                  | 7                  |
| <b>METHODS</b>                     |    |                                                                                                                                                                                                                                                                                                             |                    |
| Protocol and registration          | 5  | Indicate if a review protocol exists, if and where it can be accessed (e.g., Web address), and, if available, provide registration information including registration number.                                                                                                                               | 8                  |
| Eligibility criteria               | 6  | Specify study characteristics (e.g., PICOS, length of follow-up) and report characteristics (e.g., years considered, language, publication status) used as criteria for eligibility, giving rationale.                                                                                                      | 8, 9               |
| Information sources                | 7  | Describe all information sources (e.g., databases with dates of coverage, contact with study authors to identify additional studies) in the search and date last searched.                                                                                                                                  | 8                  |
| Search                             | 8  | Present full electronic search strategy for at least one database, including any limits used, such that it could be repeated.                                                                                                                                                                               | 8                  |
| Study selection                    | 9  | State the process for selecting studies (i.e., screening, eligibility, included in systematic review, and, if applicable, included in the meta-analysis).                                                                                                                                                   | 8                  |
| Data collection process            | 10 | Describe method of data extraction from reports (e.g., piloted forms, independently, in duplicate) and any processes for obtaining and confirming data from investigators.                                                                                                                                  | 9, 10              |
| Data items                         | 11 | List and define all variables for which data were sought (e.g., PICOS, funding sources) and any assumptions and simplifications made.                                                                                                                                                                       | 9, 10              |
| Risk of bias in individual studies | 12 | Describe methods used for assessing risk of bias of individual studies (including specification of whether this was done at the study or outcome level), and how this information is to be used in any data synthesis.                                                                                      | 10                 |
| Summary measures                   | 13 | State the principal summary measures (e.g., risk ratio, difference in means).                                                                                                                                                                                                                               | 10, 11             |
| Synthesis of results               | 14 | Describe the methods of handling data and combining results of studies, if done, including measures of consistency (e.g., $I^2$ for each meta-analysis).                                                                                                                                                    | 10, 11             |



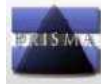

# PRISMA 2009 Checklist

Page 1 of 2

| Section/topic                 | #  | Checklist item                                                                                                                                                                                           | Reported on page # |
|-------------------------------|----|----------------------------------------------------------------------------------------------------------------------------------------------------------------------------------------------------------|--------------------|
| Risk of bias across studies   | 15 | Specify any assessment of risk of bias that may affect the cumulative evidence (e.g., publication bias, selective reporting within studies).                                                             | 10                 |
| Additional analyses           | 16 | Describe methods of additional analyses (e.g., sensitivity or subgroup analyses, meta-regression), if done, indicating which were pre-specified.                                                         | 10, 11             |
| <b>RESULTS</b>                |    |                                                                                                                                                                                                          |                    |
| Study selection               | 17 | Give numbers of studies screened, assessed for eligibility, and included in the review, with reasons for exclusions at each stage, ideally with a flow diagram.                                          | 12                 |
| Study characteristics         | 18 | For each study, present characteristics for which data were extracted (e.g., study size, PICOS, follow-up period) and provide the citations.                                                             | 12, 13             |
| Risk of bias within studies   | 19 | Present data on risk of bias of each study and, if available, any outcome level assessment (see item 12).                                                                                                | 13                 |
| Results of individual studies | 20 | For all outcomes considered (benefits or harms), present, for each study: (a) simple summary data for each intervention group (b) effect estimates and confidence intervals, ideally with a forest plot. | 13, 14, 15         |
| Synthesis of results          | 21 | Present results of each meta-analysis done, including confidence intervals and measures of consistency.                                                                                                  | 13, 14, 15         |
| Risk of bias across studies   | 22 | Present results of any assessment of risk of bias across studies (see Item 15).                                                                                                                          | 13                 |
| Additional analysis           | 23 | Give results of additional analyses, if done (e.g., sensitivity or subgroup analyses, meta-regression [see Item 16]).                                                                                    | 15                 |
| <b>DISCUSSION</b>             |    |                                                                                                                                                                                                          |                    |
| Summary of evidence           | 24 | Summarize the main findings including the strength of evidence for each main outcome; consider their relevance to key groups (e.g., healthcare providers, users, and policy makers).                     | 16                 |
| Limitations                   | 25 | Discuss limitations at study and outcome level (e.g., risk of bias), and at review-level (e.g., incomplete retrieval of identified research, reporting bias).                                            | 16, 17             |
| Conclusions                   | 26 | Provide a general interpretation of the results in the context of other evidence, and implications for future research.                                                                                  | 19                 |
| <b>FUNDING</b>                |    |                                                                                                                                                                                                          |                    |
| Funding                       | 27 | Describe sources of funding for the systematic review and other support (e.g., supply of data); role of funders for the systematic review.                                                               | 4                  |

From: Moher D, Liberati A, Tetzlaff J, Altman DG, The PRISMA Group (2009). Preferred Reporting Items for Systematic Reviews and Meta-Analyses: The PRISMA Statement. PLoS Med 6(6): e1000097. doi:10.1371/journal.pmed1000097

For more information, visit: [www.prisma-statement.org](http://www.prisma-statement.org).

For peer review only - <http://bmjopen.bmj.com/site/about/guidelines.xhtml>

Page 2 of 2
