# Supplementary material for: Improving risk factor management for patients with poorly controlled type 2 diabetes: a systematic review of healthcare interventions in primary care and community settings
Source: PubMed Central journal article supplement — BMJ Open. 2017 Aug 4;7(8):e015135. doi: 10.1136/bmjopen-2016-015135 (PMC5724222; doi:10.1136/bmjopen-2016-015135), 2017-08-04
Supplement: bmjopen-2016-015135supp001.pdf [file bmjopen-2016-015135supp001.pdf]

practitioner's[Title/Abstract] OR general practitioners[Title/Abstract] OR general practitioner[Title/Abstract] OR general practicionners[Title/Abstract] OR general practice[Title/Abstract]) OR (family practice[Title/Abstract] OR family practices[Title/Abstract] OR family practioner[Title/Abstract] OR family practise[Title/Abstract] OR family practitioner[Title/Abstract] OR family practitioners[Title/Abstract]) OR outpatient?[Title/Abstract] OR clinic?[Title/Abstract] OR ambulatory[Title/Abstract] OR health centre?[Title/Abstract] OR health centre?[Title/Abstract] OR office[Title/Abstract] OR veterans[Title/Abstract] OR pharmacist[Title/Abstract] OR nurse[Title/Abstract] OR doctor[Title/Abstract] OR psychologist[Title/Abstract] OR health care provider[Title/Abstract] OR case manager[Title/Abstract] OR "case management"[Title/Abstract] OR "care management"[Title/Abstract]) AND ("1990/01/01"[PDAT] : "2016/12/31"[PDAT])) AND ((Lipid[Title/Abstract] OR cholesterol[Title/Abstract] OR blood pressure[Title/Abstract] OR hypertension[Title/Abstract] OR cardiovascular risk[Title/Abstract] OR glycaemic[Title/Abstract] OR glycemic[Title/Abstract] OR HbA1c[Title/Abstract] OR A1c[Title/Abstract] OR (HbA[Title/Abstract] AND 1c[All Fields]) AND Title/Abstract[All Fields] OR haemoglobin[Title/Abstract] OR hemoglobin[Title/Abstract]) AND ("1990/01/01"[PDAT] : "2016/12/31"[PDAT])) AND ((Diabetes[Title/Abstract] OR T2D\$[Title/Abstract] OR NIDDM[Title/Abstract] OR MODY[Title/Abstract] OR Non-insulin dependent[Title/Abstract] OR Insulin[Title/Abstract] OR IDDM[Title/Abstract] OR Poorly-controlled[Title/Abstract]) AND ("1990/01/01"[PDAT] : "2016/12/31"[PDAT])) AND ("1990/01/01"[PDAT] : "2016/12/31"[PDAT]))

## WoS search

TS = (Diabetes OR T2D\$ OR NIDDM OR MODY OR Non-insulin dependent OR Insulin OR IDDM OR Poorly-controlled )

AND

TS = (Lipid OR cholesterol OR blood pressure OR hypertension OR cardiovascular risk OR glycaemic OR glycemic OR HbA1c OR A1c OR (HbA AND (1c)) OR haemoglobin OR hemoglobin)

AND

TS = (primary care or primary health or family physician\* or general practi\* or family practi\* or outpatient? or clinic? or ambulatory or health centre? or health centre? or office)

TI = (Diabetes OR T2D\$ OR NIDDM OR MODY OR Non-insulin dependent OR Insulin OR IDDM OR Poorly-controlled ) AND TS = (Lipid OR cholesterol OR blood pressure OR hypertension OR cardiovascular risk OR glycaemic OR glycemic OR HbA1c OR A1c OR (HbA AND (1c)) OR haemoglobin OR hemoglobin) AND TS = (primary care or primary health or family physician\* or general practi\* or family practi\* or outpatient? or clinic? or ambulatory or health centre? or health centre? or office)

*Indexes=SCI-EXPANDED, SSCI, CPCI-S, CPCI-SSH Timespan=1990-2016*

## SCOPUS

lipid OR cholesterol OR blood pressure OR hypertension OR cardiovascular risk

OR glycaemic OR glycemic OR hba1c OR a1c OR ( hba AND ( 1c ) ) OR haemoglobin OR hemoglobin AND diabetes OR t2d\$ OR niddm OR mody OR non-insulin dependent OR insulin OR iddm OR poorly-controlled AND primary care OR primary health OR family physician\* OR general practi\* OR family practi\* OR outpatient? OR clinic? OR ambulatory OR health centre? OR health centre? OR office AND ( EXCLUDE ( SUBJAREA , "DENT" ) OR EXCLUDE ( SUBJAREA , "ENVI" ) OR EXCLUDE ( SUBJAREA , "DENT" ) OR EXCLUDE ( SUBJAREA , "ENVI" ) OR EXCLUDE ( SUBJAREA , "ARTS" ) OR EXCLUDE ( SUBJAREA , "CHEM" ) OR EXCLUDE ( SUBJAREA , "ENGI" ) OR EXCLUDE ( SUBJAREA , "BUSI" ) OR EXCLUDE ( SUBJAREA , "ECON" ) OR EXCLUDE ( SUBJAREA , "VETE" ) OR EXCLUDE ( SUBJAREA , "MATE" ) OR EXCLUDE ( SUBJAREA , "COMP" ) OR EXCLUDE ( SUBJAREA , "MATH" ) OR EXCLUDE ( SUBJAREA , "EART" ) OR EXCLUDE ( SUBJAREA , "PHYS" ) )

1990- 2016 Title abstract

## Embase

(primary care OR primary health OR family physician\* OR general practi\* OR family practi\* OR outpatient? OR clinic? OR ambulatory OR health centre? OR health centre? OR office OR veterans OR pharmacist OR nurse OR doctor OR psychologist OR OR health care provider OR case manager OR case management OR care management):ab,ti

AND

(Lipid OR cholesterol OR blood pressure OR hypertension OR cardiovascular risk OR glycaemic OR glycemic OR HbA1c OR A1c OR (HbA AND (1c)) OR haemoglobin OR haemoglobin):ab,ti

AND

(Diabetes OR T2D\$ OR NIDDM OR MODY OR Non-insulin dependent OR Insulin OR IDDM OR Poorly-controlled):ab,ti

**Cochrane Library = 74**

(Diabetes OR T2D\$ OR NIDDM OR MODY OR Non-insulin dependent OR Insulin OR IDDM OR Poorly-controlled)

AND

(Lipid OR cholesterol OR blood pressure OR hypertension OR cardiovascular risk OR glycaemic OR glycemic OR HbA1c OR A1c OR (HbA AND (1c)) OR haemoglobin OR hemoglobin)

AND

(primary care or primary health or family physician\* or general practi\* or family practi\* or outpatient? or clinic? or ambulatory or health centre? or health centre? or office or veterans OR pharmacist OR nurse OR doctor OR psychologist OR health care provider OR case manager OR case management OR care management)

(Diabetes OR T2D\$ OR NIDDM OR MODY OR Non-insulin dependent OR Insulin OR IDDM OR Poorly-controlled) AND ( Lipid OR cholesterol OR blood pressure OR hypertension OR cardiovascular risk OR glycaemic OR glycemic OR HbA1c OR A1c OR (HbA AND (1c)) OR haemoglobin) AND (primary care or primary health or family physician\* or general practi\* or family practi\* or outpatient? or clinic? or ambulatory or health centre? or health centre? or office or veterans OR pharmacist OR nurse OR doctor OR psychologist OR health care provider OR case manager OR case management OR care management) in Title, Abstract, Keywords in Cochrane Reviews
