# Supplementary material for: Improving risk factor management for patients with poorly controlled type 2 diabetes: a systematic review of healthcare interventions in primary care and community settings
Source: PubMed Central journal article supplement — BMJ Open. 2017 Aug 4;7(8):e015135. doi: 10.1136/bmjopen-2016-015135 (PMC5724222; doi:10.1136/bmjopen-2016-015135), 2017-08-04
Supplement: bmjopen-2016-015135supp002.pdf [file bmjopen-2016-015135supp002.pdf]

| <b>Appendix 2: Cochrane Effective Practice And Organisation of Care Review Group taxonomy of interventions:</b> |                                                                                                                                                                                                                                                                                       |
|-----------------------------------------------------------------------------------------------------------------|---------------------------------------------------------------------------------------------------------------------------------------------------------------------------------------------------------------------------------------------------------------------------------------|
| <b>Professional interventions</b>                                                                               | For example; distribution of educational materials to healthcare professional, or educational meetings, or audit and feedback.                                                                                                                                                        |
| <b>Organisational interventions</b>                                                                             | For example; Revision of professional role (e.g. community pharmacist providing case management for patient with diabetes) or skill mix changes (changes in numbers, types or qualifications of staff). Included telemedicine interventions with predominant organisational elements. |
| <b>Patient-orientated interventions</b>                                                                         | For example; patient education, peer support or support for self management. Including telephone and telemedicine interventions with predominant patients elements (with focus on self-management)                                                                                    |
| <b>Financial interventions</b>                                                                                  | For example; Fee-for-service for provider or a penalty for the patient.                                                                                                                                                                                                               |
| <b>Regulatory interventions</b>                                                                                 | For example; changes to local or national regulations designed to alter care delivery to improve outcomes.                                                                                                                                                                            |
